# Supplementary material
Source: publisher site journal article supplement (https://www.dovepress.com/article/454180)
Supplement: Supplementary file 1 [file get_supplementary_file.php]

Comparison and visualization of the balance of covariates among the three groups weighted by the generalized propensity score

In **Supplementary Figure S1**: "1" stands for "CON group"; "2" stands for "QYKL group"; "3" stands for "Q&D group";

(1) Age (**Supplementary Figure S1A**);

(2) Gender(**Supplementary Figure S1B**);

(3) Etiology (**Supplementary Figure S1C**);

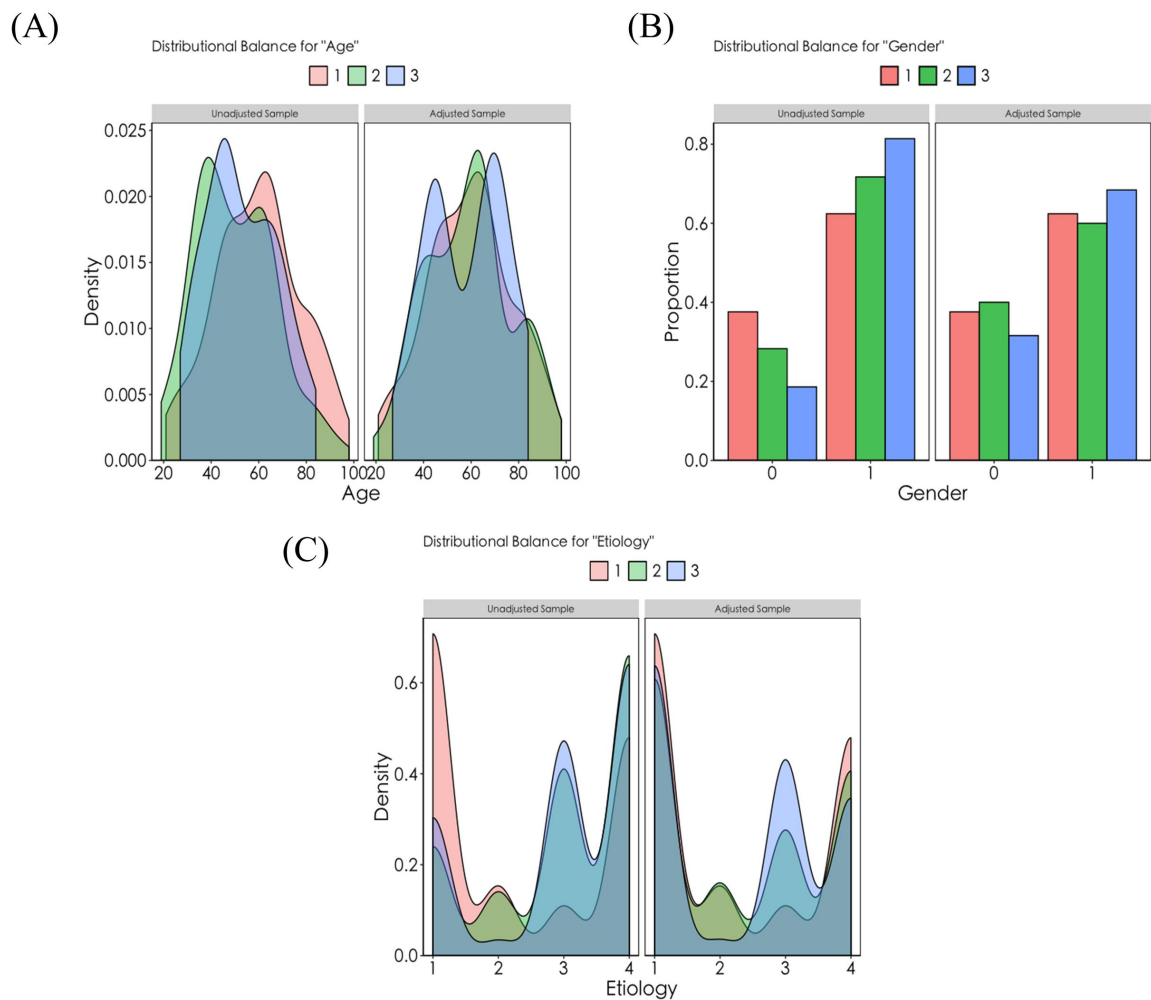

**Supplementary Figure S1.** Comparison of the distribution of the age (A), gender (B), and etiologies (C) of the three groups before and after GPSW.

**Supplementary Figure 2.** The total ion chromatogram.

QYKL-POS

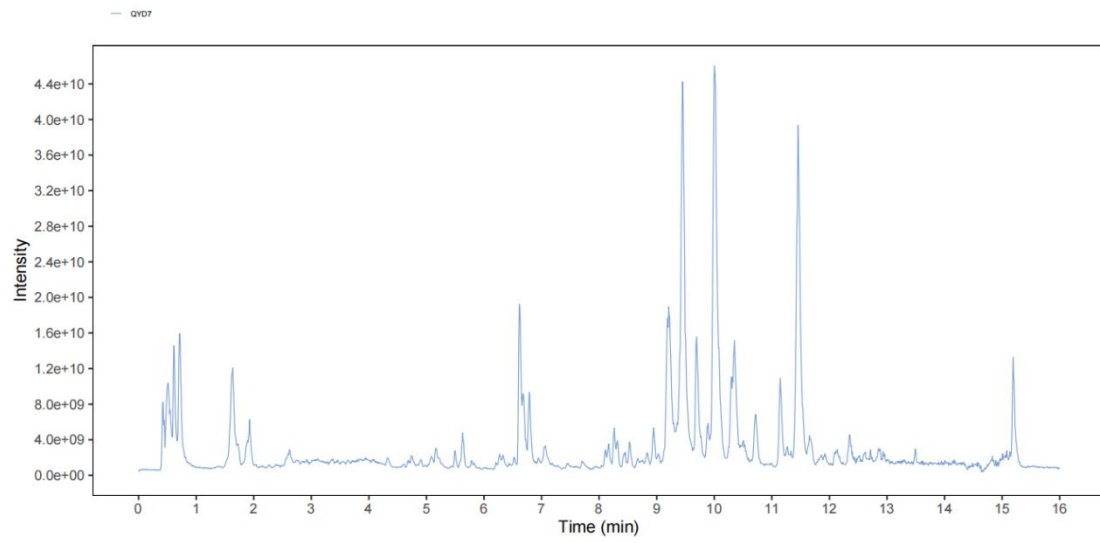

QYKL-NET

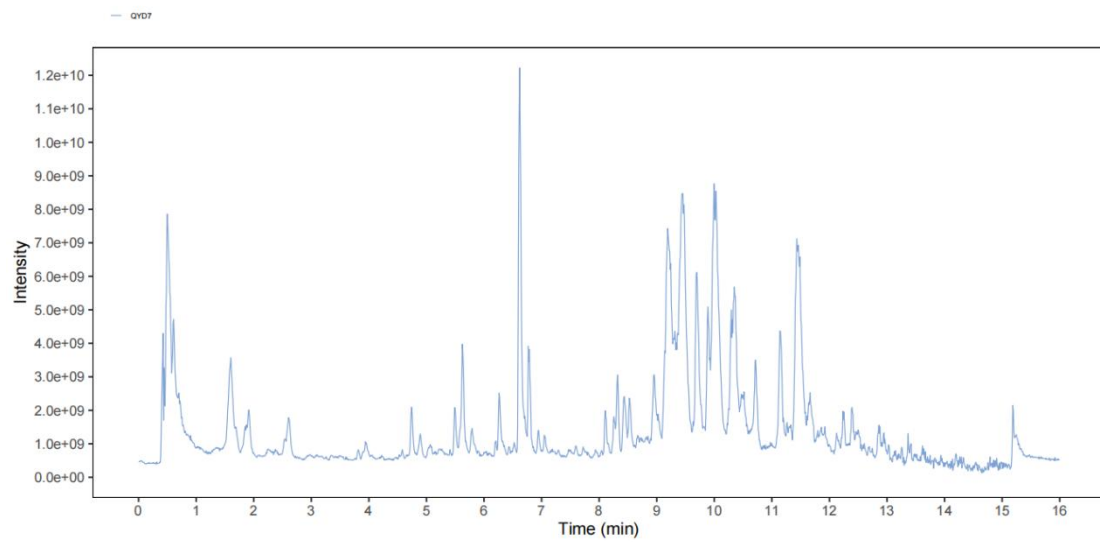

## Blank serum-POS

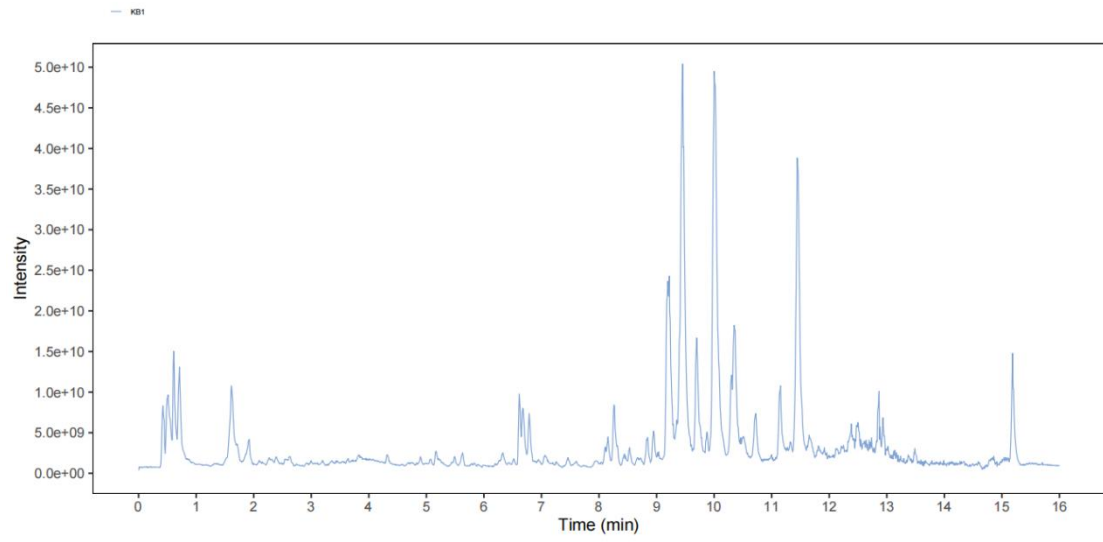

## Blank serum-NET

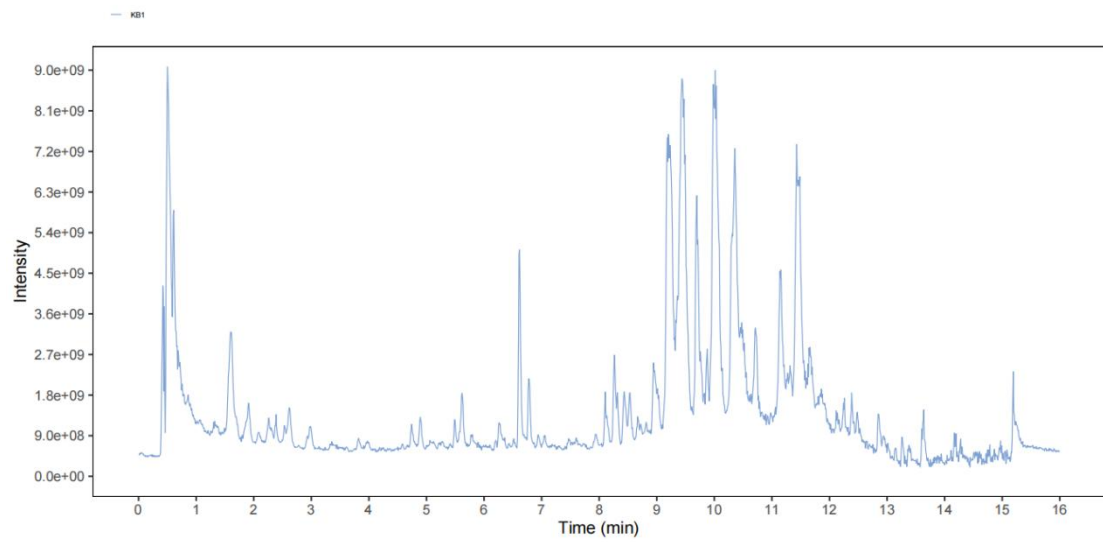

### QYKL serum-POS

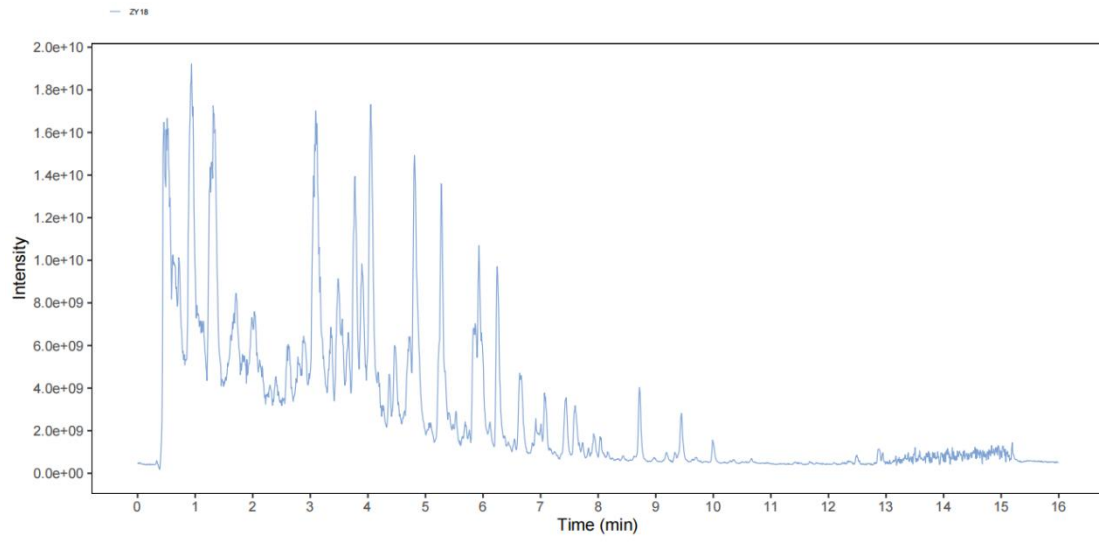

### QYKL serum-NET

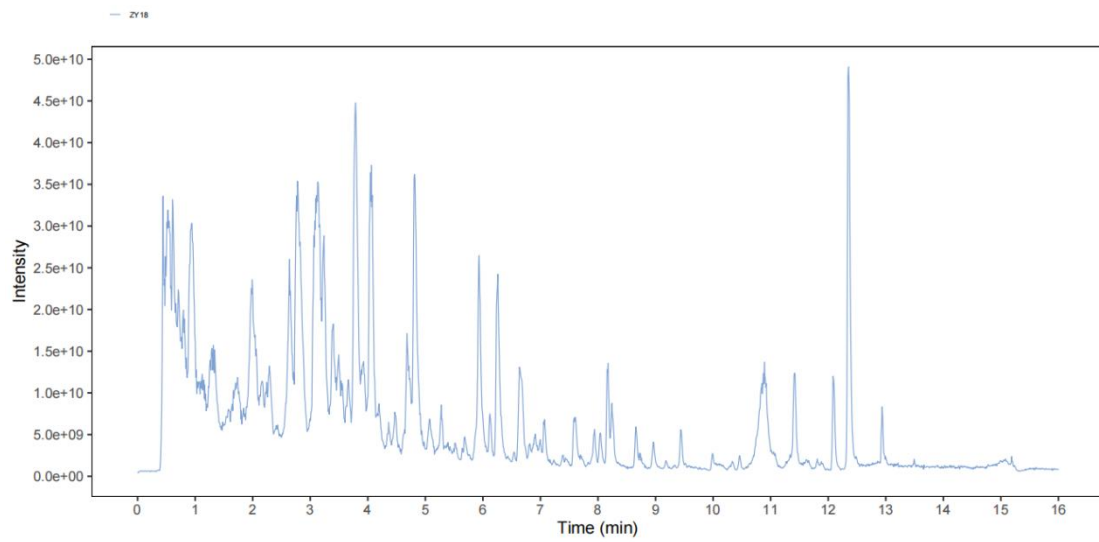



## Supplementary method S1

### Retrospective Study

#### 1. *Diagnostic criteria*

The diagnosis was confirmed by meeting two of the following criteria (refer to the 2012 Atlanta diagnostic criteria (Banks et al., 2013)):

1. Abdominal pain consistent with AP (acute, sudden, continuous, severe upper abdominal pain, which can radiate to the back);
2. Serum amylase (Amy) and lipase (Lps) are more than three times higher than the upper limit of normal;
3. Imaging examinations (enhanced CT/MRI or abdominal ultrasound) show AP characteristic changes (pancreatic edema or peripancreatic osmosis effusion).

#### 2. *Inclusion criteria*

1. AP patients who meet the above diagnostic criteria;
2. Moderate severe acute pancreatitis (MSAP) is characterized by organ failure/local complication that last less than 48 hours—severe acute pancreatitis (SAP) is characterized by persistent organ dysfunction lasting more than 48 hours. The diagnostic criteria for organ dysfunction are based on the modified Marshall score system, with any organ score  $\geq 2$  being defined as having organ dysfunction;
3. Age > 18 years.

#### 3. *Exclusion criteria*

1. Patients with severe heart, liver, and kidney diseases;
2. Patients with shock and cachexia;
3. Patients with recurrent AP;
4. Patients with a previous hematopoietic system primary disease;
5. Patients with earlier complications of rheumatic immune disorders or mental illness;
6. Pregnant and puerperal patients;
7. Patients with incomplete medical records.

#### 4. *Dropout or termination criteria*

1. Those patients who failed to meet the diagnostic criteria after being included;
2. Those who were found to have other treatment options after being formed;
3. Those who had insufficient clinical data, which affected the judgment of the

curative effect;

4. Those who had been contained but did not adhere to the study's intervention methods;

5. Patients with serious adverse events caused by the study drug;

6. Patients who failed to follow the treatment plan and had poor compliance.

## 5 Grouping methods

### 5.1 CON group

The treatment of this group mainly refers to the *American College of Gastroenterology Guideline: Management of Acute Pancreatitis* published by the American College of Gastroenterology (ACG) in 2013 (Tenner et al., 2013), *The IAP/APA evidence-based guidelines for the management of acute pancreatitis*, issued by the International Association of Pancreatology (IAP) and the American Pancreatic Association (APA) (Working Group IAP/APA Acute Pancreatitis Guidelines 2013). Patients followed routine treatment plans, including general treatment, early fasting of water, continuous gastrointestinal decompression, acid suppression, enteral nutrition, maintenance of water, electrolyte and acid-base balance, preventive application of antibiotics and symptomatic treatment (analgesia and sedation, blood sugar control, anticoagulation, etc.).

### 5.2 QYKL group-"routine treatment plans + Qingyi granules"

The Qingyi granules used were prepared and developed by the Abdominal Emergency Surgery Department of the First Affiliated Hospital of Dalian Medical University. The ingredients include rhubarb, mirabilite, Gardenia, Scutellaria, Bupleurum, Putchunk, Corydalis, and Radix Paeoniae Alba. After admission, the AP patients were treated by a doctor of traditional Chinese medicine in the department after syndrome differentiation and treatment, including symptomatic treatment such as "removing stasis by purgation, soothing liver to regulate qi". The doctors also performed symptomatic therapy with Chinese medicine as early as possible for the patients in the hospital. The route of administration was oral administration, gastric tube injection, enema, or self-dispense with treatment. The dosage was 10 g, with two

daily doses. The dosing course varied from 2 to 10 days until the patient's AP symptoms were relieved.

### *5.3 Q&D group-"routine treatment plans + Qingyi granules + DEX"*

The routine treatment and Qingyi Granules dosing regimen are the same as above. The DEX preparation was the DEX sodium phosphate injection produced by Sinopharm Rongsheng Pharmaceutical Co. Ltd, with the standard Sinopharm H41020036. The administration time was during the symptomatic treatment when the patient developed SIRS. The administration route was via intravenous injection. The administration dose was 5 mg/piece and was according to the different heights, weights of the patients and the clinician's judgment of the patient's condition. Then, the corresponding dose was given. The treatment course varied from 2 to 10 days, and treatment was given until the patient's AP symptoms were relieved.

## *6 Observation indicators*

### *6.1 Baseline data*

The baseline data included age, sex, nation, respiratory rate, body temperature, pulse, surgical history, etiology, severity classification, and symptoms at admission (such as nausea and vomiting).

### *6.2 Main efficacy indicators*

The main efficacy indicators included (1) incidence of ALI/ARDS, (2) incidence of pleural effusion, and (3) mortality.

### *6.3 Secondary efficacy indicators*

(1) Symptom improvement: duration of abdominal pain and bloating after admission; (2) Changes in physical signs: whether there were abnormal bowel sounds during hospitalization; (3) Laboratory indicators (difference between discharge and admission), including serum Amy and Lps, white blood cell count (WBC#), and neutrophil count (Neut#). Since Amy and Lps did not correlate with the severity of AP, it was only used as a secondary observation in this study. (4) Whether to admit the patient to the ICU; (5) Whether the patient should be treated with a ventilator.

The normal reference range of laboratory indicators in the First Affiliated Hospital of Dalian Medical University is as follows: serum Amy (30-110 U/L), serum Lps

(23-300 U/L), WBC# ( $3.5-9.5 \times 10^9/L$ ), and Neut# ( $1.8-6.3 \times 10^9/L$ ).

#### 6.4 Economic indicators

The economic indicators included (1) length of hospital stay, (2) ICU stay and (3) treatment expense.

#### 7. Statistical analysis

Statistical software R (Version 4.1.1; R Core Team, 2021) was used for statistical description and inference. The quantitative data was expressed as the mean and standard deviation, and the qualitative data was expressed as the frequency and percentage. The characteristics of the CON group, QYKL group, and Q&D group of patients were compared by one-factor analysis of variance, rank sum test, and test. A general linear model based on generalized propensity score weighting (GPSW) (Feng et al., 2012) and a binary logistic regression model was used to estimate the aforementioned curative effect, prognosis, and safety indicators between the various treatment groups in order to reduce the influence of confounding factors caused by the differences in baseline characteristics on prognosis and the differences in the safety indices between the groups. The inspection level is  $\alpha = 0.05$ . When  $P < 0.05$ , the difference was considered statistically significant.

Based on the calculated propensity scores, GPSW uses the principle of the standardization method to assign a corresponding weight to each study subject by the propensity score value for weighting so that the propensity score distribution is consistent in each group, thus achieving the purpose of eliminating the influence of confounding factors

## References

- Banks, P.A., Bollen, T.L., Dervenis, C., Gooszen, H.G., Johnson, C.D., Sarr, M.G., et al., 2013. Classification of acute pancreatitis--2012: revision of the Atlanta classification and definitions by international consensus. *Gut* 62, 102-111.
- Working Group IAP/APA Acute Pancreatitis Guidelines, 2013. IAP/APA evidence-based guidelines for the management of acute pancreatitis. *Pancreatology* 13, e1-15.
- Feng, P., Zhou, X.H., Zou, Q.M., Fan, M.Y., Li, X.S., 2012. Generalized propensity score for estimating the average treatment effect of multiple treatments. *Stat Med* 31, 681-697.

Tenner, S., Baillie, J., DeWitt, J., Vege, S.S., American College of Gastroenterology, 2013. American College of Gastroenterology guideline: management of acute pancreatitis. *Am. J. Gastroenterol.* 108, 1400-1415; 1416.

## Supplementary method S2

### 2.2 Studies on the ingredients absorbed into the serum of QYKL

#### 1. *Materials, instruments, and reagents*

HPLC-grade methanol and acetonitrile were purchased from CNW Technologies. HPLC-grade formic acid was purchased from SIGMA. QYKL was obtained as hospital preparations. Ultra-high-performance liquid chromatography (1290 UHPLC) was purchased from Agilent. High-resolution mass spectrometry (Q Exactive Focus) was purchased from Thermo Fisher Scientific, and column (ACQUITY UPLC BEH C18 1.7  $\mu\text{m}$  2.1\*100 mm) was from Waters.

#### 2. *Analysis methods and data processing*

Six QYKL samples, each weighing 100 mg, were collected, and 500  $\mu\text{L}$  of the extract was added, followed by a vortex, homogenization, and an ultrasonic immersion in cold water. The samples were left at  $-40\text{ }^{\circ}\text{C}$  for 1 h before being centrifuged at  $4\text{ }^{\circ}\text{C}$  and 12,000 rpm for 15 min. The supernatant was filtered through a 0.22  $\mu\text{m}$  microporous membrane filter and stored at  $-80\text{ }^{\circ}\text{C}$ . 400  $\mu\text{L}$  of serum was thawed at ambient temperature, and 40  $\mu\text{L}$  of hydrochloric acid was added. The mixture was vortexed at  $4\text{ }^{\circ}\text{C}$  for 15 min. After repeating the preceding steps four times: 1) Add 1.6 mL acetonitrile vortex; 2) Centrifuge at 12000 rpm for 5 min; 3) Take 1.8 mL of supernatant blow-drying by using nitrogen. Then 150  $\mu\text{L}$  80 % methanol was added for resolution. The resolution was vortexed and centrifuged at 12000 rpm for 5 min. The sample vial contained 120  $\mu\text{L}$  of supernatant for detection.

At  $55\text{ }^{\circ}\text{C}$ , 5  $\mu\text{L}$  of samples were separated using a UPLC BEH C18 column (1.7  $\mu\text{m}$  2.1\*100 mm) with an optimal flow rate of 500  $\mu\text{L}/\text{min}$ . For primary and secondary mass spectrum data acquisition, the Q Exactive Focus mass spectrometer was controlled by control software (Xcalibur, Thermo Fisher Scientific) based on the FullScan-ddMS2 function. XCMS software was used to import the original mass spectrum. Retention time correction, peak recognition, peak extraction, peak integration, and peak alignment were carried out. The self-built secondary mass spectrum database and

corresponding cracking law matching method were utilized to identify the constituents of MSMS data-containing peaks. The collected raw mass spectrum data was processed to determine the chemical composition of QYKL. We converted the mass spectrum serum data to CSV format and uploaded it to the Metaboanalyst (<https://www.metaboanalyst.ca/>). Separately, we conducted principal component analysis and partial least square discriminant analysis, and VIP and P values were calculated between the components of the two groups. Compounds with a VIP value greater than 1 and a P value less than 0.05 were considered prototype constituents of QYKL absorbed into the serum.

**Supplementary Table S1**

| AP_ARDS_SNPs    |                            |                           |                           |                          |                   |                  |                  |                |                   |                 |                 |
|-----------------|----------------------------|---------------------------|---------------------------|--------------------------|-------------------|------------------|------------------|----------------|-------------------|-----------------|-----------------|
| SNP             | effect_allele.e<br>xposure | other_allele.e<br>xposure | effect_allele.o<br>utcome | other_allele.<br>outcome | beta.ex<br>posure | beta.ou<br>tcome | pval.out<br>come | se.out<br>come | pval.exp<br>osure | se.exp<br>osure | F               |
| rs1136<br>06801 | T                          | C                         | T                         | C                        | -0.3394<br>77     | -0.1735<br>78    | 0.4928<br>11     | 0.253<br>086   | 1.73E-0<br>7      | 0.0649<br>534   | 27.315<br>98922 |
| rs1153<br>43810 | G                          | A                         | G                         | A                        | 0.30873<br>4      | -0.2913          | 0.3172<br>36     | 0.291<br>255   | 4.21E-0<br>7      | 0.0610<br>242   | 25.595<br>56555 |
| rs1167<br>43228 | C                          | T                         | C                         | T                        | 0.33181<br>7      | 0.0458<br>345    | 0.8202<br>72     | 0.201<br>741   | 3.69E-1<br>5      | 0.0421<br>888   | 61.859<br>00351 |
| rs1478<br>39099 | G                          | A                         | G                         | A                        | 0.23521<br>9      | -0.0916<br>796   | 0.6251<br>17     | 0.187<br>633   | 5.88E-0<br>9      | 0.0404<br>137   | 33.875<br>64492 |
| rs1501<br>76211 | A                          | G                         | A                         | G                        | -0.4809<br>93     | -0.2250<br>66    | 0.3837<br>57     | 0.258<br>401   | 2.59E-1<br>2      | 0.0687<br>322   | 48.973<br>03527 |
| rs1504<br>50809 | T                          | C                         | T                         | C                        | 0.25689<br>1      | 0.0632<br>874    | 0.7874<br>65     | 0.234<br>741   | 4.29E-0<br>7      | 0.0508<br>128   | 25.559<br>4512  |
| rs1786<br>4109  | A                          | G                         | A                         | G                        | 0.30516<br>2      | -0.1036<br>51    | 0.7325<br>6      | 0.303<br>319   | 2.78E-0<br>6      | 0.0651<br>204   | 21.959<br>71938 |
| rs1910<br>41365 | T                          | C                         | T                         | C                        | 0.42757<br>8      | -0.2250<br>48    | 0.4012<br>48     | 0.268<br>108   | 3.22E-1<br>5      | 0.0542<br>459   | 62.129<br>35787 |
| rs2395<br>184   | A                          | G                         | A                         | G                        | 0.11252<br>7      | 0.0181<br>226    | 0.8586<br>48     | 0.101<br>758   | 1.17E-0<br>6      | 0.0231<br>544   | 23.618<br>17945 |
| rs3098<br>843   | G                          | A                         | G                         | A                        | -0.0888<br>568    | -0.0679<br>977   | 0.3852<br>23     | 0.078<br>3101  | 1.05E-0<br>6      | 0.0181<br>991   | 23.838<br>6422  |
| rs4888          | C                          | T                         | C                         | T                        | 0.18837           | 0.0559           | 0.6580           | 0.126          | 8.65E-1           | 0.0307          | 37.607          |



|        |   |   |   |   |         |         |        |       |         |        |        |
|--------|---|---|---|---|---------|---------|--------|-------|---------|--------|--------|
| 362    |   |   |   |   | 6       | 296     | 02     | 345   | 0       | 178    | 19351  |
| rs4987 | A | G | A | G | 0.20415 | -0.0073 | 0.9543 | 0.129 | 5.81E-1 | 0.0283 | 51.908 |
| 704    |   |   |   |   | 1       | 9205    | 23     | 055   | 3       | 357    | 09986  |
| rs6206 | A | G | A | G | -0.1827 | -0.0601 | 0.6995 | 0.155 | 1.48E-0 | 0.0379 | 23.179 |
| 3640   |   |   |   |   | 2       | 634     | 33     | 883   | 6       | 523    | 06816  |
| rs7376 | A | G | A | G | 0.08458 | -0.0490 | 0.5324 | 0.078 | 3.11E-0 | 0.0181 | 21.749 |
| 7325   |   |   |   |   | 82      | 129     | 44     | 511   | 6       | 378    | 55369  |
| rs7624 | A | G | A | G | 0.08871 | 0.0099  | 0.9011 | 0.080 | 1.56E-0 | 0.0184 | 23.070 |
| 577    |   |   |   |   | 49      | 7981    | 17     | 3203  | 6       | 702    | 12451  |
| rs7702 | T | G | T | G | 0.67687 | 0.8380  | 0.2882 | 0.789 | 4.88E-0 | 0.1481 | 20.885 |
| 8101   |   |   |   |   | 5       | 37      | 7      | 169   | 6       | 1      | 65905  |
| rs7935 | T | C | T | C | -0.6752 | 0.9909  | 0.0202 | 0.426 | 6.06E-0 | 0.1246 | 29.345 |
| 9283   |   |   |   |   | 81      | 84      | 838    | 954   | 8       | 56     | 57927  |
| rs9494 | A | G | A | G | -0.2365 | -0.0777 | 0.6368 | 0.164 | 7.51E-0 | 0.0409 | 33.398 |
| 25     |   |   |   |   | 42      | 914     | 56     | 778   | 9       | 301    | 80419  |
| rs9636 | A | G | A | G | -0.0910 | -0.0504 | 0.5246 | 0.079 | 7.83E-0 | 0.0184 | 24.398 |
| 516    |   |   |   |   | 94      | 334     | 03     | 2647  | 7       | 421    | 25691  |

| AP_Pleural effusion |                            |                           |                           |                          |                   |                  |                  |                |                   |                 |        |
|---------------------|----------------------------|---------------------------|---------------------------|--------------------------|-------------------|------------------|------------------|----------------|-------------------|-----------------|--------|
| SNP                 | effect_allele.<br>exposure | other_allele.<br>exposure | effect_allele.<br>outcome | other_allele.<br>outcome | beta.exp<br>osure | beta.out<br>come | pval.out<br>come | se.out<br>come | pval.exp<br>osure | se.exp<br>osure | F      |
| rs1136              | T                          | C                         | T                         | C                        | -0.3394           | -0.0328          | 0.64165          | 0.0705         | 1.73E-0           | 0.0649          | 27.315 |
| 06801               |                            |                           |                           |                          | 77                | 385              | 7                | 624            | 7                 | 534             | 98922  |
| rs1153              | G                          | A                         | G                         | A                        | 0.30873           | 0.01145          | 0.88652          | 0.0802         | 4.21E-0           | 0.0610          | 25.595 |
| 43810               |                            |                           |                           |                          | 4                 | 77               |                  | 871            | 7                 | 242             | 56555  |

|                 |   |   |   |   |                |                 |               |               |              |               |                 |
|-----------------|---|---|---|---|----------------|-----------------|---------------|---------------|--------------|---------------|-----------------|
| rs1167<br>43228 | C | T | C | T | 0.33181<br>7   | -0.0220<br>977  | 0.68793<br>3  | 0.0550<br>157 | 3.69E-1<br>5 | 0.0421<br>888 | 61.859<br>00351 |
| rs1478<br>39099 | G | A | G | A | 0.23521<br>9   | -0.0470<br>504  | 0.35875<br>6  | 0.0512<br>677 | 5.88E-0<br>9 | 0.0404<br>137 | 33.875<br>64492 |
| rs1501<br>76211 | A | G | A | G | -0.4809<br>93  | -0.0075<br>3508 | 0.91822<br>5  | 0.0733<br>909 | 2.59E-1<br>2 | 0.0687<br>322 | 48.973<br>03527 |
| rs1504<br>50809 | T | C | T | C | 0.25689<br>1   | 0.08642<br>01   | 0.18196<br>6  | 0.0647<br>475 | 4.29E-0<br>7 | 0.0508<br>128 | 25.559<br>4512  |
| rs1786<br>4109  | A | G | A | G | 0.30516<br>2   | -0.1331<br>26   | 0.10610<br>1  | 0.0823<br>814 | 2.78E-0<br>6 | 0.0651<br>204 | 21.959<br>71938 |
| rs1910<br>41365 | T | C | T | C | 0.42757<br>8   | -0.0367<br>825  | 0.62299<br>7  | 0.0748<br>209 | 3.22E-1<br>5 | 0.0542<br>459 | 62.129<br>35787 |
| rs3098<br>843   | G | A | G | A | -0.0888<br>568 | -0.0482<br>86   | 0.02369<br>08 | 0.0213<br>456 | 1.05E-0<br>6 | 0.0181<br>991 | 23.838<br>6422  |
| rs4888<br>362   | C | T | C | T | 0.18837<br>6   | 0.03877<br>48   | 0.25607<br>9  | 0.0341<br>415 | 8.65E-1<br>0 | 0.0307<br>178 | 37.607<br>19351 |
| rs4987<br>704   | A | G | A | G | 0.20415<br>1   | 0.03740<br>38   | 0.28799<br>2  | 0.0352<br>024 | 5.81E-1<br>3 | 0.0283<br>357 | 51.908<br>09986 |
| rs6206<br>3640  | A | G | A | G | -0.1827<br>2   | 0.04433<br>46   | 0.29750<br>1  | 0.0425<br>554 | 1.48E-0<br>6 | 0.0379<br>523 | 23.179<br>06816 |
| rs7376<br>7325  | A | G | A | G | 0.08458<br>82  | -0.0054<br>7883 | 0.79793<br>1  | 0.0213<br>996 | 3.11E-0<br>6 | 0.0181<br>378 | 21.749<br>55369 |
| rs7624<br>577   | A | G | A | G | 0.08871<br>49  | 0.00458<br>439  | 0.83394<br>2  | 0.0218<br>67  | 1.56E-0<br>6 | 0.0184<br>702 | 23.070<br>12451 |
| rs7702<br>8101  | T | G | T | G | 0.67687<br>5   | 0.08113<br>24   | 0.70788<br>1  | 0.2165<br>24  | 4.88E-0<br>6 | 0.1481<br>1   | 20.885<br>65905 |

|                |   |   |   |   |               |                |              |               |              |               |                 |
|----------------|---|---|---|---|---------------|----------------|--------------|---------------|--------------|---------------|-----------------|
| rs7935<br>9283 | T | C | T | C | -0.6752<br>81 | 0.18734<br>9   | 0.11140<br>9 | 0.1176<br>89  | 6.06E-0<br>8 | 0.1246<br>56  | 29.345<br>57927 |
| rs9494<br>25   | A | G | A | G | -0.2365<br>42 | -0.0594<br>625 | 0.18625<br>5 | 0.0449<br>88  | 7.51E-0<br>9 | 0.0409<br>301 | 33.398<br>80419 |
| rs9636<br>516  | A | G | A | G | -0.0910<br>94 | -0.0489<br>553 | 0.02372<br>9 | 0.0216<br>473 | 7.83E-0<br>7 | 0.0184<br>421 | 24.398<br>25691 |

| AP_Pulmonary edema |                            |                           |                           |                          |                   |                  |                  |                |                   |                 |                 |
|--------------------|----------------------------|---------------------------|---------------------------|--------------------------|-------------------|------------------|------------------|----------------|-------------------|-----------------|-----------------|
| SNP                | effect_allele.<br>exposure | other_allele.<br>exposure | effect_allele.<br>outcome | other_allele.<br>outcome | beta.exp<br>osure | beta.out<br>come | pval.out<br>come | se.out<br>come | pval.exp<br>osure | se.exp<br>osure | F               |
| rs1136<br>06801    | T                          | C                         | T                         | C                        | -0.3394<br>77     | 0.04370<br>3     | 0.83452<br>2     | 0.2092         | 0.00000<br>0173   | 0.0649<br>534   | 27.315<br>98922 |
| rs1153<br>43810    | G                          | A                         | G                         | A                        | 0.30873<br>4      | 0.19918<br>2     | 0.40837<br>3     | 0.2409<br>19   | 0.00000<br>0421   | 0.0610<br>242   | 25.595<br>56555 |
| rs1167<br>43228    | C                          | T                         | C                         | T                        | 0.33181<br>7      | 0.06850<br>82    | 0.68207<br>8     | 0.1672<br>45   | 3.69E-1<br>5      | 0.0421<br>888   | 61.859<br>00351 |
| rs1478<br>39099    | G                          | A                         | G                         | A                        | 0.23521<br>9      | -0.2479<br>03    | 0.10779<br>1     | 0.1541<br>49   | 5.88E-0<br>9      | 0.0404<br>137   | 33.875<br>64492 |
| rs1501<br>76211    | A                          | G                         | A                         | G                        | -0.4809<br>93     | -0.0184<br>385   | 0.93149<br>8     | 0.2145         | 2.59E-1<br>2      | 0.0687<br>322   | 48.973<br>03527 |
| rs1504<br>50809    | T                          | C                         | T                         | C                        | 0.25689<br>1      | 0.14970<br>4     | 0.43955<br>2     | 0.1936<br>78   | 0.00000<br>0429   | 0.0508<br>128   | 25.559<br>4512  |
| rs1786<br>4109     | A                          | G                         | A                         | G                        | 0.30516<br>2      | -0.4924<br>21    | 0.05131<br>8     | 0.2526<br>78   | 0.00000<br>278    | 0.0651<br>204   | 21.959<br>71938 |
| rs1910             | T                          | C                         | T                         | C                        | 0.42757           | 0.07570          | 0.73612          | 0.2246         | 3.22E-1           | 0.0542          | 62.129          |

|        |   |   |   |   |         |         |         |        |         |        |        |
|--------|---|---|---|---|---------|---------|---------|--------|---------|--------|--------|
| 41365  |   |   |   |   | 8       | 5       | 7       | 53     | 5       | 459    | 35787  |
| rs2395 |   |   |   |   | 0.11252 | -0.0459 | 0.58635 | 0.0845 | 0.00000 | 0.0231 | 23.618 |
| 184    | A | G | A | G | 7       | 919     | 8       | 252    | 117     | 544    | 17945  |
| rs3098 |   |   |   |   | -0.0888 | -0.0525 | 0.41761 | 0.0648 | 0.00000 | 0.0181 | 23.838 |
| 843    | G | A | G | A | 568     | 773     | 4       | 648    | 105     | 991    | 6422   |
| rs4888 |   |   |   |   | 0.18837 | 0.01804 | 0.86381 | 0.1051 | 8.65E-1 | 0.0307 | 37.607 |
| 362    | C | T | C | T | 6       | 07      | 7       | 83     | 0       | 178    | 19351  |
| rs4987 |   |   |   |   | 0.20415 | -0.0034 | 0.97412 | 0.1070 | 5.81E-1 | 0.0283 | 51.908 |
| 704    | A | G | A | G | 1       | 7237    | 6       | 6      | 3       | 357    | 09986  |
| rs6206 |   |   |   |   | -0.1827 | 0.12121 | 0.34906 | 0.1294 | 0.00000 | 0.0379 | 23.179 |
| 3640   | A | G | A | G | 2       | 1       | 4       | 43     | 148     | 523    | 06816  |
| rs7376 |   |   |   |   | 0.08458 | 0.11812 | 0.07042 | 0.0652 | 0.00000 | 0.0181 | 21.749 |
| 7325   | A | G | A | G | 82      | 6       | 06      | 918    | 311     | 378    | 55369  |
| rs7624 |   |   |   |   | 0.08871 | 0.01762 | 0.79137 | 0.0666 | 0.00000 | 0.0184 | 23.070 |
| 577    | A | G | A | G | 49      | 94      | 1       | 442    | 156     | 702    | 12451  |
| rs7702 |   |   |   |   | 0.67687 | 0.80575 | 0.23352 | 0.6763 | 0.00000 | 0.1481 | 20.885 |
| 8101   | T | G | T | G | 5       | 5       | 2       | 45     | 488     | 1      | 65905  |
| rs7935 |   |   |   |   | -0.6752 | -0.3300 | 0.35506 | 0.3568 | 6.06E-0 | 0.1246 | 29.345 |
| 9283   | T | C | T | C | 81      | 6       |         | 92     | 8       | 56     | 57927  |
| rs9494 |   |   |   |   | -0.2365 | -0.0438 | 0.74904 | 0.1371 | 7.51E-0 | 0.0409 | 33.398 |
| 25     | A | G | A | G | 42      | 711     |         | 37     | 9       | 301    | 80419  |
| rs9636 |   |   |   |   | -0.0910 | 0.20497 | 0.00128 | 0.0636 | 0.00000 | 0.0184 | 24.398 |
| 516    | A | G | A | G | 94      |         | 301     | 604    | 0783    | 421    | 25691  |

AAP\_ARDS

| SNP             | effect_allele.<br>exposure | other_allele.<br>exposure | effect_allele.<br>outcome | other_allele.<br>outcome | beta.exp<br>osure | beta.out<br>come | pval.out<br>come | se.out<br>come | pval.exp<br>osure | se.exp<br>osure | F               |
|-----------------|----------------------------|---------------------------|---------------------------|--------------------------|-------------------|------------------|------------------|----------------|-------------------|-----------------|-----------------|
| rs10035<br>432  | A                          | G                         | A                         | G                        | 0.19216<br>8      | 0.02399<br>23    | 0.83535<br>4     | 0.1154<br>36   | 3.22E-0<br>8      | 0.0347<br>572   | 30.5683<br>9064 |
| rs10755<br>490  | G                          | A                         | G                         | A                        | 0.11311<br>2      | 0.04972<br>39    | 0.52546<br>2     | 0.0783<br>116  | 4.63E-0<br>6      | 0.0246<br>928   | 20.9834<br>399  |
| rs10847<br>506  | T                          | C                         | T                         | C                        | 0.14256<br>9      | -0.0058<br>0512  | 0.95209<br>7     | 0.0966<br>339  | 4.95E-0<br>6      | 0.0312<br>186   | 20.8556<br>3226 |
| rs11443<br>4804 | G                          | T                         | G                         | T                        | 0.32014<br>7      | 0.06505<br>89    | 0.79170<br>2     | 0.2463<br>42   | 4.10E-0<br>6      | 0.0695<br>015   | 21.2182<br>9668 |
| rs11534<br>3810 | G                          | A                         | G                         | A                        | 0.50865<br>1      | -0.2913          | 0.31723<br>6     | 0.2912<br>55   | 5.02E-1<br>1      | 0.0774<br>163   | 43.1692<br>9769 |
| rs11542<br>8418 | T                          | C                         | T                         | C                        | -0.3408<br>4      | -0.2256<br>18    | 0.23178<br>4     | 0.1886<br>79   | 1.99E-0<br>7      | 0.0655<br>378   | 27.0468<br>938  |
| rs11618<br>0834 | A                          | G                         | A                         | G                        | 0.42979<br>5      | 0.09985<br>4     | 0.73800<br>3     | 0.2985<br>18   | 1.07E-0<br>7      | 0.0808<br>774   | 28.2402<br>3816 |
| rs11627<br>6626 | T                          | C                         | T                         | C                        | 0.43172<br>7      | 0.06586<br>19    | 0.84182<br>1     | 0.3300<br>27   | 3.48E-0<br>6      | 0.0930<br>409   | 21.5313<br>1797 |
| rs11674<br>3228 | C                          | T                         | C                         | T                        | 0.47202<br>6      | 0.04583<br>45    | 0.82027<br>2     | 0.2017<br>41   | 5.52E-1<br>8      | 0.0546<br>195   | 74.6855<br>187  |
| rs12532<br>408  | A                          | G                         | A                         | G                        | 0.24527<br>7      | 0.13960<br>9     | 0.40777<br>3     | 0.1686<br>47   | 6.01E-0<br>7      | 0.0491<br>44    | 24.9099<br>3801 |
| rs14783<br>9099 | G                          | A                         | G                         | A                        | 0.32653<br>1      | -0.0916<br>796   | 0.62511<br>7     | 0.1876<br>33   | 8.54E-1<br>0      | 0.0532<br>278   | 37.6332<br>568  |
| rs18084<br>1391 | T                          | G                         | T                         | G                        | 0.36308<br>5      | 0.00375<br>726   | 0.98863<br>6     | 0.2637<br>93   | 1.64E-0<br>6      | 0.0757<br>563   | 22.9709<br>5782 |

|         |   |   |   |   |         |         |         |        |         |        |         |
|---------|---|---|---|---|---------|---------|---------|--------|---------|--------|---------|
| rs19104 | T | C | T | C | 0.65080 | -0.2250 | 0.40124 | 0.2681 | 1.04E-2 | 0.0679 | 91.6352 |
| 1365    |   |   |   |   | 1       | 48      | 8       | 08     | 1       | 856    | 4677    |
| rs20997 | A | G | A | G | 0.17961 | 0.06851 | 0.59697 | 0.1295 | 3.96E-0 | 0.0389 | 21.2832 |
| 00      |   |   |   |   | 8       | 67      | 8       | 82     | 6       | 342    | 135     |
| rs47265 | G | T | G | T | 0.16679 | -0.0519 | 0.52051 | 0.0807 | 8.35E-1 | 0.0256 | 42.1741 |
| 75      |   |   |   |   | 6       | 109     | 7       | 891    | 1       | 84     | 1135    |
| rs53127 | A | G | A | G | -0.4868 | -0.5330 | 0.04698 | 0.2683 | 6.04E-0 | 0.0975 | 24.8989 |
| 1210    |   |   |   |   | 14      | 54      | 83      | 51     | 7       | 601    | 8509    |
| rs64539 | T | C | T | C | 0.12303 | 0.02066 | 0.79514 | 0.0796 | 8.78E-0 | 0.0250 | 24.1780 |
| 12      |   |   |   |   | 7       | 74      | 3       | 008    | 7       | 222    | 0619    |
| rs65014 | T | C | T | C | -0.1261 | -0.0467 | 0.59412 | 0.0877 | 3.25E-0 | 0.0271 | 21.6649 |
| 57      |   |   |   |   | 49      | 768     | 1       | 822    | 6       | 022    | 9198    |
| rs65760 | C | T | C | T | 0.12964 | -0.0056 | 0.94513 | 0.0825 | 4.64E-0 | 0.0257 | 25.4087 |
| 81      |   |   |   |   | 9       | 8063    | 3       | 441    | 7       | 204    | 2693    |
| rs72815 | A | G | A | G | 0.29349 | 0.07497 | 0.72230 | 0.2109 | 1.22E-0 | 0.0604 | 23.5418 |
| 830     |   |   |   |   | 3       | 21      | 7       | 65     | 6       | 892    | 08      |
| rs92713 | A | G | A | G | 0.12591 | 0.12979 | 0.10235 | 0.0794 | 5.53E-0 | 0.0251 | 25.0688 |
| 67      |   |   |   |   | 2       | 7       | 1       | 562    | 7       | 478    | 4062    |
| rs96358 | A | G | A | G | -0.1331 | -0.1009 | 0.24612 | 0.0870 | 1.86E-0 | 0.0279 | 22.7323 |
| 12      |   |   |   |   | 75      | 59      | 5       | 475    | 6       | 319    | 5627    |
| rs98427 | T | G | T | G | 0.11558 | 0.11474 | 0.14358 | 0.0784 | 2.80E-0 | 0.0246 | 21.9469 |
| 94      |   |   |   |   | 6       | 2       | 1       | 517    | 6       | 728    | 2061    |

---

AAP\_Pleural effusion

---

| SNP | effect_allele. | other_allele. | effect_allele. | other_allele. | beta.exp | beta.out | pval.out | se.out | pval.exp | se.exp | F |
|-----|----------------|---------------|----------------|---------------|----------|----------|----------|--------|----------|--------|---|
|-----|----------------|---------------|----------------|---------------|----------|----------|----------|--------|----------|--------|---|

---

|        | exposure | exposure | outcome | outcome | osure   | come    | come    | come   | osure   | osure  |        |
|--------|----------|----------|---------|---------|---------|---------|---------|--------|---------|--------|--------|
| rs1003 |          |          |         |         | 0.19216 | -0.0198 | 0.52852 | 0.0314 | 3.22E-0 | 0.0347 | 30.568 |
| 5432   | A        | G        | A       | G       | 8       | 518     | 1       | 975    | 8       | 572    | 39064  |
| rs1075 |          |          |         |         | 0.11311 | -0.0165 | 0.43884 | 0.0213 | 4.63E-0 | 0.0246 | 20.983 |
| 5490   | G        | A        | G       | A       | 2       | 487     | 4       | 767    | 6       | 928    | 4399   |
| rs1084 |          |          |         |         | 0.14256 | 0.03389 | 0.19779 | 0.0263 | 4.95E-0 | 0.0312 | 20.855 |
| 7506   | T        | C        | T       | C       | 9       | 27      | 2       | 169    | 6       | 186    | 63226  |
| rs1144 |          |          |         |         | 0.32014 | -0.0265 | 0.69327 | 0.0671 | 4.10E-0 | 0.0695 | 21.218 |
| 34804  | G        | T        | G       | T       | 7       | 014     | 4       | 916    | 6       | 015    | 29668  |
| rs1153 |          |          |         |         | 0.50865 | 0.01145 | 0.88652 | 0.0802 | 5.02E-1 | 0.0774 | 43.169 |
| 43810  | G        | A        | G       | A       | 1       | 77      |         | 871    | 1       | 163    | 29769  |
| rs1154 |          |          |         |         | -0.3408 | -0.0715 | 0.15767 | 0.0506 | 1.99E-0 | 0.0655 | 27.046 |
| 28418  | T        | C        | T       | C       | 4       | 699     | 1       | 53     | 7       | 378    | 8938   |
| rs1161 |          |          |         |         | 0.42979 | 0.03352 | 0.68645 | 0.0830 | 1.07E-0 | 0.0808 | 28.240 |
| 80834  | A        | G        | A       | G       | 5       | 02      | 3       | 383    | 7       | 774    | 23816  |
| rs1162 |          |          |         |         | 0.43172 | 0.12737 | 0.16533 | 0.0918 | 3.48E-0 | 0.0930 | 21.531 |
| 76626  | T        | C        | T       | C       | 7       | 8       | 5       | 14     | 6       | 409    | 31797  |
| rs1167 |          |          |         |         | 0.47202 | -0.0220 | 0.68793 | 0.0550 | 5.52E-1 | 0.0546 | 74.685 |
| 43228  | C        | T        | C       | T       | 6       | 977     | 3       | 157    | 8       | 195    | 5187   |
| rs1253 |          |          |         |         | 0.24527 | 0.08840 | 0.05412 | 0.0459 | 6.01E-0 | 0.0491 | 24.909 |
| 2408   | A        | G        | A       | G       | 7       | 4       | 28      | 039    | 7       | 44     | 93801  |
| rs1478 |          |          |         |         | 0.32653 | -0.0470 | 0.35875 | 0.0512 | 8.54E-1 | 0.0532 | 37.633 |
| 39099  | G        | A        | G       | A       | 1       | 504     | 6       | 677    | 0       | 278    | 2568   |
| rs1808 |          |          |         |         | 0.36308 | 0.04729 | 0.52328 | 0.0740 | 1.64E-0 | 0.0757 | 22.970 |
| 41391  | T        | G        | T       | G       | 5       | 62      | 5       | 983    | 6       | 563    | 95782  |
| rs1910 |          |          |         |         | 0.65080 | -0.0367 | 0.62299 | 0.0748 | 1.04E-2 | 0.0679 | 91.635 |

|        |   |   |   |   |         |         |         |        |         |        |        |
|--------|---|---|---|---|---------|---------|---------|--------|---------|--------|--------|
| 41365  |   |   |   |   | 1       | 825     | 7       | 209    | 1       | 856    | 24677  |
| rs2099 | A | G | A | G | 0.17961 | 0.03676 | 0.29992 | 0.0354 | 3.96E-0 | 0.0389 | 21.283 |
| 700    |   |   |   |   | 8       | 87      | 8       | 709    | 6       | 342    | 2135   |
| rs4726 | G | T | G | T | 0.16679 | 0.01601 | 0.46743 | 0.0220 | 8.35E-1 | 0.0256 | 42.174 |
| 575    |   |   |   |   | 6       | 31      | 7       | 367    | 1       | 84     | 11135  |
| rs5312 | A | G | A | G | -0.4868 | 0.05428 | 0.47814 | 0.0765 | 6.04E-0 | 0.0975 | 24.898 |
| 71210  |   |   |   |   | 14      | 48      |         | 333    | 7       | 601    | 98509  |
| rs6453 | T | C | T | C | 0.12303 | -0.0319 | 0.14117 | 0.0216 | 8.78E-0 | 0.0250 | 24.178 |
| 912    |   |   |   |   | 7       | 246     | 9       | 965    | 7       | 222    | 00619  |
| rs6501 | T | C | T | C | -0.1261 | -0.0142 | 0.55179 | 0.0239 | 3.25E-0 | 0.0271 | 21.664 |
| 457    |   |   |   |   | 49      | 696     | 7       | 797    | 6       | 022    | 99198  |
| rs6576 | C | T | C | T | 0.12964 | 0.01126 | 0.61778 | 0.0225 | 4.64E-0 | 0.0257 | 25.408 |
| 081    |   |   |   |   | 9       | 7       | 9       | 798    | 7       | 204    | 72693  |
| rs7281 | A | G | A | G | 0.29349 | -0.0522 | 0.36570 | 0.0577 | 1.22E-0 | 0.0604 | 23.541 |
| 5830   |   |   |   |   | 3       | 28      | 6       | 394    | 6       | 892    | 808    |
| rs9635 | A | G | A | G | -0.1331 | -0.0145 | 0.53916 | 0.0236 | 1.86E-0 | 0.0279 | 22.732 |
| 812    |   |   |   |   | 75      | 501     | 9       | 945    | 6       | 319    | 35627  |
| rs9842 | T | G | T | G | 0.11558 | -0.0206 | 0.33704 | 0.0214 | 2.80E-0 | 0.0246 | 21.946 |
| 794    |   |   |   |   | 6       | 091     | 8       | 675    | 6       | 728    | 92061  |

AAP\_Pulmonary edema

| SNP            | effect_allele.<br>exposure | other_allele.<br>exposure | effect_allele.<br>outcome | other_allele.<br>outcome | beta.exp<br>osure | beta.out<br>come | pval.out<br>come | se.out<br>come | pval.exp<br>osure | se.exp<br>osure | F      |
|----------------|----------------------------|---------------------------|---------------------------|--------------------------|-------------------|------------------|------------------|----------------|-------------------|-----------------|--------|
| rs1003<br>5432 | A                          | G                         | A                         | G                        | 0.19216           | 0.06958          | 0.46720          | 0.0957         | 3.22E-0           | 0.0347          | 30.568 |
|                |                            |                           |                           |                          | 8                 | 33               | 7                | 087            | 8                 | 572             | 39064  |



|                 |   |   |   |   |              |                |              |               |              |               |                 |
|-----------------|---|---|---|---|--------------|----------------|--------------|---------------|--------------|---------------|-----------------|
| rs1075<br>5490  | G | A | G | A | 0.11311<br>2 | -0.0535<br>866 | 0.41079<br>6 | 0.0651<br>514 | 4.63E-0<br>6 | 0.0246<br>928 | 20.983<br>4399  |
| rs1084<br>7506  | T | C | T | C | 0.14256<br>9 | 0.03319<br>09  | 0.67886<br>9 | 0.0801<br>7   | 4.95E-0<br>6 | 0.0312<br>186 | 20.855<br>63226 |
| rs1144<br>34804 | G | T | G | T | 0.32014<br>7 | -0.0561<br>972 | 0.78270<br>5 | 0.2037<br>64  | 4.10E-0<br>6 | 0.0695<br>015 | 21.218<br>29668 |
| rs1153<br>43810 | G | A | G | A | 0.50865<br>1 | 0.19918<br>2   | 0.40837<br>3 | 0.2409<br>19  | 5.02E-1<br>1 | 0.0774<br>163 | 43.169<br>29769 |
| rs1154<br>28418 | T | C | T | C | -0.3408<br>4 | -0.0355<br>068 | 0.81860<br>2 | 0.1548<br>19  | 1.99E-0<br>7 | 0.0655<br>378 | 27.046<br>8938  |
| rs1161<br>80834 | A | G | A | G | 0.42979<br>5 | 0.22608<br>9   | 0.36765<br>9 | 0.2509<br>69  | 1.07E-0<br>7 | 0.0808<br>774 | 28.240<br>23816 |
| rs1162<br>76626 | T | C | T | C | 0.43172<br>7 | -0.2277<br>91  | 0.41149<br>6 | 0.2773<br>66  | 3.48E-0<br>6 | 0.0930<br>409 | 21.531<br>31797 |
| rs1167<br>43228 | C | T | C | T | 0.47202<br>6 | 0.06850<br>82  | 0.68207<br>8 | 0.1672<br>45  | 5.52E-1<br>8 | 0.0546<br>195 | 74.685<br>5187  |
| rs1253<br>2408  | A | G | A | G | 0.24527<br>7 | 0.03951<br>43  | 0.77699<br>1 | 0.1395<br>07  | 6.01E-0<br>7 | 0.0491<br>44  | 24.909<br>93801 |
| rs1478<br>39099 | G | A | G | A | 0.32653<br>1 | -0.2479<br>03  | 0.10779<br>1 | 0.1541<br>49  | 8.54E-1<br>0 | 0.0532<br>278 | 37.633<br>2568  |
| rs1808<br>41391 | T | G | T | G | 0.36308<br>5 | 0.03986<br>51  | 0.85476<br>9 | 0.2177<br>98  | 1.64E-0<br>6 | 0.0757<br>563 | 22.970<br>95782 |
| rs1910<br>41365 | T | C | T | C | 0.65080<br>1 | 0.07570<br>5   | 0.73612<br>7 | 0.2246<br>53  | 1.04E-2<br>1 | 0.0679<br>856 | 91.635<br>24677 |
| rs2099<br>700   | A | G | A | G | 0.17961<br>8 | -0.0213<br>895 | 0.84223<br>9 | 0.1074<br>68  | 3.96E-0<br>6 | 0.0389<br>342 | 21.283<br>2135  |

|                 |   |   |   |   |               |                 |               |               |              |               |                 |
|-----------------|---|---|---|---|---------------|-----------------|---------------|---------------|--------------|---------------|-----------------|
| rs4726<br>575   | G | T | G | T | 0.16679<br>6  | -0.0707<br>113  | 0.29223<br>9  | 0.0671<br>38  | 8.35E-1<br>1 | 0.0256<br>84  | 42.174<br>11135 |
| rs5312<br>71210 | A | G | A | G | -0.4868<br>14 | -0.0084<br>0224 | 0.96960<br>4  | 0.2205<br>01  | 6.04E-0<br>7 | 0.0975<br>601 | 24.898<br>98509 |
| rs6453<br>912   | T | C | T | C | 0.12303<br>7  | 0.02198<br>21   | 0.73924<br>3  | 0.0660<br>409 | 8.78E-0<br>7 | 0.0250<br>222 | 24.178<br>00619 |
| rs6501<br>457   | T | C | T | C | -0.1261<br>49 | 0.06102<br>41   | 0.40361       | 0.0730<br>661 | 3.25E-0<br>6 | 0.0271<br>022 | 21.664<br>99198 |
| rs6576<br>081   | C | T | C | T | 0.12964<br>9  | 0.13677<br>5    | 0.04662<br>41 | 0.0687<br>419 | 4.64E-0<br>7 | 0.0257<br>204 | 25.408<br>72693 |
| rs7281<br>5830  | A | G | A | G | 0.29349<br>3  | 0.05937<br>06   | 0.73399<br>5  | 0.1747<br>13  | 1.22E-0<br>6 | 0.0604<br>892 | 23.541<br>808   |
| rs9271<br>367   | A | G | A | G | 0.12591<br>2  | -0.0812<br>964  | 0.21841<br>7  | 0.0660<br>544 | 5.53E-0<br>7 | 0.0251<br>478 | 25.068<br>84062 |
| rs9635<br>812   | A | G | A | G | -0.1331<br>75 | 0.03405<br>67   | 0.63840<br>3  | 0.0724<br>716 | 1.86E-0<br>6 | 0.0279<br>319 | 22.732<br>35627 |
| rs9842<br>794   | T | G | T | G | 0.11558<br>6  | 0.03468         | 0.59536<br>2  | 0.0653<br>006 | 2.80E-0<br>6 | 0.0246<br>728 | 21.946<br>92061 |

| AP_Cytokine    |                        |                       |                       |                      |                |               |             |                    |              |                |               |                |
|----------------|------------------------|-----------------------|-----------------------|----------------------|----------------|---------------|-------------|--------------------|--------------|----------------|---------------|----------------|
| SNP            | effect_allele.exposure | other_allele.exposure | effect_allele.outcome | other_allele.outcome | beta.e.xposure | beta.o.utcome | se.ou.tcome | outcome.deprecated | pval.outcome | pval.e.xposure | se.exposure   | F              |
| rs113<br>60680 | T                      | C                     | T                     | C                    | -0.339<br>477  | -0.011<br>8   | 0.082<br>6  | CTACK levels       | 0.8771       | 1.73E-<br>07   | 0.064<br>9534 | 27.31<br>59892 |

|       |   |   |   |   |        |        |       |              |        |        |       |       |       |
|-------|---|---|---|---|--------|--------|-------|--------------|--------|--------|-------|-------|-------|
| 1     |   |   |   |   |        |        |       |              |        |        |       |       | 2     |
| rs115 |   |   |   |   | 0.3087 | 0.087  | 0.114 |              |        |        |       |       | 25.59 |
| 34381 | G | A | G | A | 34     | 8      | 2     | CTACK levels | 0.4453 | 4.21E- | 0.061 | 55655 |       |
| 0     |   |   |   |   |        |        |       |              |        | 07     | 0242  | 5     |       |
| rs116 |   |   |   |   | 0.3318 | 0.118  | 0.063 |              |        |        |       |       | 61.85 |
| 74322 | C | T | C | T | 17     | 9      | 1     | CTACK levels | 0.0586 | 3.69E- | 0.042 | 90035 |       |
| 8     |   |   |   |   |        |        |       |              |        | 503    | 15    | 1888  | 1     |
| rs147 |   |   |   |   | 0.2352 | -0.066 | 0.061 |              |        |        |       |       | 33.87 |
| 83909 | G | A | G | A | 19     | 2      | 9     | CTACK levels | 0.2862 | 5.88E- | 0.040 | 56449 |       |
| 9     |   |   |   |   |        |        |       |              |        | 09     | 4137  | 2     |       |
| rs150 |   |   |   |   | 0.2568 | -0.051 | 0.072 |              |        |        |       |       | 25.55 |
| 45080 | T | C | T | C | 91     | 2      | 6     | CTACK levels | 0.5187 | 4.29E- | 0.050 | 25.55 |       |
| 9     |   |   |   |   |        |        |       |              |        | 07     | 8128  | 94512 |       |
| rs178 |   |   |   |   | 0.3051 | 0.041  | 0.090 |              |        |        |       |       | 21.95 |
| 64109 | A | G | A | G | 62     | 2      | 9     | CTACK levels | 0.616  | 2.78E- | 0.065 | 97193 |       |
|       |   |   |   |   |        |        |       |              |        | 06     | 1204  | 8     |       |
| rs239 |   |   |   |   | 0.1125 | -0.029 | 0.030 |              |        |        |       |       | 23.61 |
| 5184  | A | G | A | G | 27     |        | 9     | CTACK levels | 0.3447 | 1.17E- | 0.023 | 81794 |       |
|       |   |   |   |   |        |        |       |              |        | 06     | 1544  | 5     |       |
| rs309 |   |   |   |   | -0.088 | -0.015 | 0.024 |              |        |        |       |       | 23.83 |
| 8843  | G | A | G | A | 8568   | 4      | 7     | CTACK levels | 0.5322 | 1.05E- | 0.018 | 86422 |       |
|       |   |   |   |   |        |        |       |              |        | 06     | 1991  |       |       |
| rs488 |   |   |   |   | 0.1883 | -0.025 | 0.037 |              |        |        |       |       | 37.60 |
| 8362  | C | T | C | T | 76     | 4      | 5     | CTACK levels | 0.4992 | 8.65E- | 0.030 | 71935 |       |
|       |   |   |   |   |        |        |       |              |        | 10     | 7178  | 1     |       |
| rs498 |   |   |   |   | 0.2041 | -0.044 | 0.039 |              |        |        |       |       | 51.90 |
| 7704  | A | G | A | G | 51     | 9      | 2     | CTACK levels | 0.2537 | 5.81E- | 0.028 | 80998 |       |
|       |   |   |   |   |        |        |       |              |        | 13     | 3357  |       |       |



|       |   |   |   |   |        |        |       |                   |        |        |       |       |
|-------|---|---|---|---|--------|--------|-------|-------------------|--------|--------|-------|-------|
| 74322 |   |   |   |   | 17     | 3      | 8     | factor levels     |        | 15     | 1888  | 90035 |
| 8     |   |   |   |   |        |        |       |                   |        |        |       | 1     |
| rs147 |   |   |   |   | 0.2352 | 0.013  | 0.063 | beta-nerve growth |        | 5.88E- | 0.040 | 33.87 |
| 83909 | G | A | G | A | 19     | 1      | 3     | factor levels     | 0.8345 | 09     | 4137  | 56449 |
| 9     |   |   |   |   |        |        |       |                   |        |        |       | 2     |
| rs150 |   |   |   |   | 0.2568 | 0.021  | 0.072 | beta-nerve growth |        | 4.29E- | 0.050 | 25.55 |
| 45080 | T | C | T | C | 91     | 6      | 6     | factor levels     | 0.7735 | 99     | 8128  | 94512 |
| 9     |   |   |   |   |        |        |       |                   |        |        |       |       |
| rs178 |   |   |   |   | 0.3051 | 0.148  | 0.091 | beta-nerve growth |        | 2.78E- | 0.065 | 21.95 |
| 64109 | A | G | A | G | 62     | 7      | 7     | factor levels     | 0.0888 | 301    | 1204  | 97193 |
|       |   |   |   |   |        |        |       |                   |        |        |       | 8     |
| rs239 |   |   |   |   | 0.1125 | 0.004  | 0.031 | beta-nerve growth |        | 1.17E- | 0.023 | 23.61 |
| 5184  | A | G | A | G | 27     | 7      | 4     | factor levels     | 0.8786 | 06     | 1544  | 81794 |
|       |   |   |   |   |        |        |       |                   |        |        |       | 5     |
| rs309 |   |   |   |   | -0.088 | -0.023 | 0.024 | beta-nerve growth |        | 1.05E- | 0.018 | 23.83 |
| 8843  | G | A | G | A | 8568   | 1      | 9     | factor levels     | 0.3502 | 06     | 1991  | 86422 |
|       |   |   |   |   |        |        |       |                   |        |        |       |       |
| rs488 |   |   |   |   | 0.1883 | -0.005 | 0.038 | beta-nerve growth |        | 8.65E- | 0.030 | 37.60 |
| 8362  | C | T | C | T | 76     | 6      | 2     | factor levels     | 0.8811 | 10     | 7178  | 71935 |
|       |   |   |   |   |        |        |       |                   |        |        |       | 1     |
| rs498 |   |   |   |   | 0.2041 | -0.036 | 0.039 | beta-nerve growth |        | 5.81E- | 0.028 | 51.90 |
| 7704  | A | G | A | G | 51     |        | 9     | factor levels     | 0.3711 | 13     | 3357  | 80998 |
|       |   |   |   |   |        |        |       |                   |        |        |       | 6     |
| rs620 |   |   |   |   | -0.182 | 0.012  | 0.048 | beta-nerve growth |        | 1.48E- | 0.037 | 23.17 |
| 63640 | A | G | A | G | 72     | 8      | 4     | factor levels     | 0.7886 | 06     | 9523  | 90681 |
|       |   |   |   |   |        |        |       |                   |        |        |       | 6     |
| rs737 |   |   |   |   | 0.0845 | -0.001 | 0.023 | beta-nerve growth |        | 3.11E- | 0.018 | 21.74 |
|       | A | G | A | G |        |        |       |                   | 0.9354 |        |       |       |

|       |   |   |   |   |        |        |       |                    |        |        |       |       |
|-------|---|---|---|---|--------|--------|-------|--------------------|--------|--------|-------|-------|
| 67325 |   |   |   |   | 882    | 9      | 9     | factor levels      |        | 06     | 1378  | 95536 |
|       |   |   |   |   |        |        |       |                    |        |        |       | 9     |
| rs762 | A | G | A | G | 0.0887 | 0.013  | 0.026 | beta-nerve growth  | 0.5981 | 1.56E- | 0.018 | 23.07 |
| 4577  |   |   |   |   | 149    | 9      | 7     | factor levels      | 99     | 06     | 4702  | 01245 |
|       |   |   |   |   |        |        |       |                    |        |        |       | 1     |
| rs793 | T | C | T | C | -0.675 | 0.076  | 0.143 | beta-nerve growth  | 0.6879 | 6.06E- | 0.124 | 29.34 |
| 59283 |   |   |   |   | 281    | 9      | 6     | factor levels      | 99     | 08     | 656   | 55792 |
|       |   |   |   |   |        |        |       |                    |        |        |       | 7     |
| rs963 | A | G | A | G | -0.091 | -0.022 | 0.024 | beta-nerve growth  | 0.3495 | 7.83E- | 0.018 | 24.39 |
| 6516  |   |   |   |   | 094    | 6      | 5     | factor levels      |        | 07     | 4421  | 82569 |
|       |   |   |   |   |        |        |       |                    |        |        |       | 1     |
| rs113 | T | C | T | C | -0.339 | -0.030 | 0.057 | Vascular           | 0.6012 | 1.73E- | 0.064 | 27.31 |
| 60680 |   |   |   |   | 477    | 4      | 9     | endothelial growth |        | 07     | 9534  | 59892 |
| 1     |   |   |   |   |        |        |       | factor levels      |        |        |       | 2     |
| rs115 | G | A | G | A | 0.3087 | 0.094  | 0.080 | Vascular           | 0.243  | 4.21E- | 0.061 | 25.59 |
| 34381 |   |   |   |   | 34     | 1      | 4     | endothelial growth |        | 07     | 0242  | 55655 |
| 0     |   |   |   |   |        |        |       | factor levels      |        |        |       | 5     |
| rs116 | C | T | C | T | 0.3318 | -0.006 | 0.046 | Vascular           | 0.931  | 3.69E- | 0.042 | 61.85 |
| 74322 |   |   |   |   | 17     | 1      | 9     | endothelial growth |        | 15     | 1888  | 90035 |
| 8     |   |   |   |   |        |        |       | factor levels      |        |        |       | 1     |
| rs147 | G | A | G | A | 0.2352 | 0.104  | 0.044 | Vascular           | 0.0199 | 5.88E- | 0.040 | 33.87 |
| 83909 |   |   |   |   | 19     | 2      | 4     | endothelial growth | 099    | 09     | 4137  | 56449 |
| 9     |   |   |   |   |        |        |       | factor levels      |        |        |       | 2     |
| rs150 | T | C | T | C | 0.2568 | -0.038 | 0.052 | Vascular           | 0.4513 | 4.29E- | 0.050 | 25.55 |
| 45080 |   |   |   |   | 91     | 2      | 1     | endothelial growth |        | 07     | 8128  | 94512 |
| 9     |   |   |   |   |        |        |       | factor levels      |        |        |       |       |

|                |   |   |   |   |                |             |            |                                                 |               |              |               |                     |
|----------------|---|---|---|---|----------------|-------------|------------|-------------------------------------------------|---------------|--------------|---------------|---------------------|
| rs178<br>64109 | A | G | A | G | 0.3051<br>62   | 0.105<br>6  | 0.070<br>1 | Vascular<br>endothelial growth<br>factor levels | 0.172         | 2.78E-<br>06 | 0.065<br>1204 | 21.95<br>97193<br>8 |
| rs239<br>5184  | A | G | A | G | 0.1125<br>27   | -0.046<br>8 | 0.022      | Vascular<br>endothelial growth<br>factor levels | 0.0334<br>303 | 1.17E-<br>06 | 0.023<br>1544 | 23.61<br>81794<br>5 |
| rs309<br>8843  | G | A | G | A | -0.088<br>8568 | -0.008<br>6 | 0.017<br>7 | Vascular<br>endothelial growth<br>factor levels | 0.6205        | 1.05E-<br>06 | 0.018<br>1991 | 23.83<br>86422      |
| rs488<br>8362  | C | T | C | T | 0.1883<br>76   | 0.03        | 0.027<br>5 | Vascular<br>endothelial growth<br>factor levels | 0.2916        | 8.65E-<br>10 | 0.030<br>7178 | 37.60<br>71935<br>1 |
| rs498<br>7704  | A | G | A | G | 0.2041<br>51   | 0.026<br>1  | 0.027<br>9 | Vascular<br>endothelial growth<br>factor levels | 0.359         | 5.81E-<br>13 | 0.028<br>3357 | 51.90<br>80998<br>6 |
| rs620<br>63640 | A | G | A | G | -0.182<br>72   | 0.016<br>1  | 0.034<br>9 | Vascular<br>endothelial growth<br>factor levels | 0.6343        | 1.48E-<br>06 | 0.037<br>9523 | 23.17<br>90681<br>6 |
| rs737<br>67325 | A | G | A | G | 0.0845<br>882  | -0.020<br>8 | 0.016<br>9 | Vascular<br>endothelial growth<br>factor levels | 0.2191        | 3.11E-<br>06 | 0.018<br>1378 | 21.74<br>95536<br>9 |
| rs762<br>4577  | A | G | A | G | 0.0887<br>149  | -0.009<br>4 | 0.018<br>5 | Vascular<br>endothelial growth<br>factor levels | 0.5921        | 1.56E-<br>06 | 0.018<br>4702 | 23.07<br>01245<br>1 |
| rs793<br>59283 | T | C | T | C | -0.675<br>281  | 0.090<br>2  | 0.099<br>3 | Vascular<br>endothelial growth                  | 0.3837        | 6.06E-<br>08 | 0.124<br>656  | 29.34<br>55792      |

|                     |   |   |   |   |               |             |            |                                                        |               |              |               |                |   |
|---------------------|---|---|---|---|---------------|-------------|------------|--------------------------------------------------------|---------------|--------------|---------------|----------------|---|
|                     |   |   |   |   |               |             |            |                                                        | factor levels |              |               |                | 7 |
| rs949<br>425        | A | G | A | G | -0.236<br>542 | -0.030<br>5 | 0.036<br>7 | Vascular<br>endothelial growth<br>factor levels        | 0.3974        | 7.51E-<br>09 | 0.040<br>9301 | 33.39<br>88041 |   |
| rs963<br>6516       | A | G | A | G | -0.091<br>094 | -0.006<br>1 | 0.017      | Vascular<br>endothelial growth<br>factor levels        | 0.6907<br>99  | 7.83E-<br>07 | 0.018<br>4421 | 24.39<br>82569 |   |
| rs113<br>60680<br>1 | T | C | T | C | -0.339<br>477 | -0.131<br>2 | 0.082<br>6 | Macrophage<br>Migration<br>Inhibitory Factor<br>levels | 0.1127        | 1.73E-<br>07 | 0.064<br>9534 | 27.31<br>59892 |   |
| rs115<br>34381<br>0 | G | A | G | A | 0.3087<br>34  | -0.083<br>3 | 0.112<br>4 | Macrophage<br>Migration<br>Inhibitory Factor<br>levels | 0.4963        | 4.21E-<br>07 | 0.061<br>0242 | 25.59<br>55655 |   |
| rs116<br>74322<br>8 | C | T | C | T | 0.3318<br>17  | -0.022<br>7 | 0.064<br>5 | Macrophage<br>Migration<br>Inhibitory Factor<br>levels | 0.7027        | 3.69E-<br>15 | 0.042<br>1888 | 61.85<br>90035 |   |
| rs147<br>83909<br>9 | G | A | G | A | 0.2352<br>19  | -0.049<br>7 | 0.062<br>5 | Macrophage<br>Migration<br>Inhibitory Factor<br>levels | 0.4284        | 5.88E-<br>09 | 0.040<br>4137 | 33.87<br>56449 |   |
| rs150<br>45080<br>9 | T | C | T | C | 0.2568<br>91  | -0.048      | 0.073<br>4 | Macrophage<br>Migration<br>Inhibitory Factor           | 0.5334<br>99  | 4.29E-<br>07 | 0.050<br>8128 | 25.55<br>94512 |   |



|                |   |   |   |   |                |              |            |                                                        |               |              |               |                     |
|----------------|---|---|---|---|----------------|--------------|------------|--------------------------------------------------------|---------------|--------------|---------------|---------------------|
| rs178<br>64109 | A | G | A | G | 0.3051<br>62   | 0.079<br>7   | 0.092<br>2 | levels<br>Macrophage<br>Migration<br>Inhibitory Factor | 0.3991        | 2.78E-<br>06 | 0.065<br>1204 | 21.95<br>97193<br>8 |
| rs239<br>5184  | A | G | A | G | 0.1125<br>27   | 0.036<br>6   | 0.031<br>5 | levels<br>Macrophage<br>Migration<br>Inhibitory Factor | 0.2449        | 1.17E-<br>06 | 0.023<br>1544 | 23.61<br>81794<br>5 |
| rs309<br>8843  | G | A | G | A | -0.088<br>8568 | 8.00E-<br>04 | 0.025      | levels<br>Macrophage<br>Migration<br>Inhibitory Factor | 0.9789        | 1.05E-<br>06 | 0.018<br>1991 | 23.83<br>86422      |
| rs488<br>8362  | C | T | C | T | 0.1883<br>76   | -0.020<br>9  | 0.038<br>3 | levels<br>Macrophage<br>Migration<br>Inhibitory Factor | 0.5859<br>01  | 8.65E-<br>10 | 0.030<br>7178 | 37.60<br>71935<br>1 |
| rs498<br>7704  | A | G | A | G | 0.2041<br>51   | 0.053<br>9   | 0.040<br>2 | levels<br>Macrophage<br>Migration<br>Inhibitory Factor | 0.1792        | 5.81E-<br>13 | 0.028<br>3357 | 51.90<br>80998<br>6 |
| rs620<br>63640 | A | G | A | G | -0.182<br>72   | -0.084<br>4  | 0.048<br>6 | levels<br>Macrophage<br>Migration<br>Inhibitory Factor | 0.0840<br>195 | 1.48E-<br>06 | 0.037<br>9523 | 23.17<br>90681<br>6 |
| rs737          | A | G | A | G | 0.0845         | 0.007        | 0.024      | levels<br>Macrophage                                   | 0.7627        | 3.11E-       | 0.018         | 21.74               |

|                     |   |   |   |   |               |             |            |                                                        |              |              |               |                     |
|---------------------|---|---|---|---|---------------|-------------|------------|--------------------------------------------------------|--------------|--------------|---------------|---------------------|
| 67325               |   |   |   |   | 882           | 2           |            | Migration<br>Inhibitory Factor<br>levels               |              | 06           | 1378          | 95536               |
| rs762<br>4577       | A | G | A | G | 0.0887<br>149 | 0.007<br>7  | 0.027<br>1 | Migration<br>Inhibitory Factor<br>levels               | 0.7685       | 1.56E-<br>06 | 0.018<br>4702 | 23.07<br>01245<br>1 |
| rs793<br>59283      | T | C | T | C | -0.675<br>281 | -0.026<br>9 | 0.138<br>3 | Macrophage<br>Migration<br>Inhibitory Factor<br>levels | 0.7867<br>99 | 6.06E-<br>08 | 0.124<br>656  | 29.34<br>55792<br>7 |
| rs949<br>425        | A | G | A | G | -0.236<br>542 | 0.030<br>6  | 0.051<br>2 | Macrophage<br>Migration<br>Inhibitory Factor<br>levels | 0.5562       | 7.51E-<br>09 | 0.040<br>9301 | 33.39<br>88041<br>9 |
| rs963<br>6516       | A | G | A | G | -0.091<br>094 | -0.004<br>6 | 0.024<br>6 | Macrophage<br>Migration<br>Inhibitory Factor<br>levels | 0.8402       | 7.83E-<br>07 | 0.018<br>4421 | 24.39<br>82569<br>1 |
| rs113<br>60680<br>1 | T | C | T | C | -0.339<br>477 | -0.002<br>9 | 0.056<br>6 | TRAIL levels                                           | 0.9714       | 1.73E-<br>07 | 0.064<br>9534 | 27.31<br>59892<br>2 |
| rs115<br>34381<br>0 | G | A | G | A | 0.3087<br>34  | 0.081<br>9  | 0.077<br>2 | TRAIL levels                                           | 0.2882       | 4.21E-<br>07 | 0.061<br>0242 | 25.59<br>55655<br>5 |
| rs116               | C | T | C | T | 0.3318        | 0.043       | 0.043      | TRAIL levels                                           | 0.3262       | 3.69E-       | 0.042         | 61.85               |

|       |   |   |   |   |        |        |       |              |        |        |       |       |
|-------|---|---|---|---|--------|--------|-------|--------------|--------|--------|-------|-------|
| 74322 |   |   |   |   | 17     | 4      | 5     |              |        | 15     | 1888  | 90035 |
| 8     |   |   |   |   |        |        |       |              |        |        |       | 1     |
| rs147 |   |   |   |   |        |        |       |              |        |        |       | 33.87 |
| 83909 | G | A | G | A | 0.2352 | -0.057 | 0.041 | TRAIL levels | 0.1647 | 5.88E- | 0.040 | 56449 |
| 9     |   |   |   |   | 19     |        | 2     |              |        | 09     | 4137  | 2     |
| rs150 |   |   |   |   |        |        |       |              |        |        |       | 25.55 |
| 45080 | T | C | T | C | 0.2568 | -0.019 | 0.049 | TRAIL levels | 0.7209 | 4.29E- | 0.050 | 94512 |
| 9     |   |   |   |   | 91     | 6      | 2     |              |        | 07     | 8128  |       |
| rs178 |   |   |   |   |        |        |       |              |        |        |       | 21.95 |
| 64109 | A | G | A | G | 0.3051 | -0.087 | 0.064 | TRAIL levels | 0.1901 | 2.78E- | 0.065 | 97193 |
|       |   |   |   |   | 62     | 7      | 3     |              |        | 06     | 1204  | 8     |
| rs191 |   |   |   |   |        |        |       |              |        |        |       | 62.12 |
| 04136 | T | C | T | C | 0.4275 | 0.138  | 0.082 | TRAIL levels | 0.0917 | 3.22E- | 0.054 | 93578 |
| 5     |   |   |   |   | 78     | 5      |       |              | 804    | 15     | 2459  | 7     |
| rs239 |   |   |   |   |        |        |       |              |        |        |       | 23.61 |
| 5184  | A | G | A | G | 0.1125 | 0.003  | 0.020 | TRAIL levels | 0.8683 | 1.17E- | 0.023 | 81794 |
|       |   |   |   |   | 27     | 4      | 6     |              |        | 06     | 1544  | 5     |
| rs309 |   |   |   |   |        |        |       |              |        |        |       | 23.83 |
| 8843  | G | A | G | A | -0.088 | -0.026 | 0.016 | TRAIL levels | 0.1107 | 1.05E- | 0.018 | 86422 |
|       |   |   |   |   | 8568   | 2      | 5     |              |        | 06     | 1991  |       |
| rs488 |   |   |   |   |        |        |       |              |        |        |       | 37.60 |
| 8362  | C | T | C | T | 0.1883 | -0.054 | 0.025 | TRAIL levels | 0.0305 | 8.65E- | 0.030 | 71935 |
|       |   |   |   |   | 76     | 8      | 5     |              | 302    | 10     | 7178  | 1     |
| rs498 |   |   |   |   |        |        |       |              |        |        |       | 51.90 |
| 7704  | A | G | A | G | 0.2041 | -0.005 | 0.026 | TRAIL levels | 0.8291 | 5.81E- | 0.028 | 80998 |
|       |   |   |   |   | 51     | 5      |       |              |        | 13     | 3357  | 6     |
| rs620 | A | G | A | G | -0.182 | -0.004 | 0.032 | TRAIL levels | 0.8987 | 1.48E- | 0.037 | 23.17 |

|       |   |   |   |   |        |        |       |                    |        |        |       |       |
|-------|---|---|---|---|--------|--------|-------|--------------------|--------|--------|-------|-------|
| 63640 |   |   |   |   | 72     | 1      | 1     |                    |        | 06     | 9523  | 90681 |
|       |   |   |   |   |        |        |       |                    |        |        |       | 6     |
| rs737 | A | G | A | G | 0.0845 | 0.005  | 0.015 | TRAIL levels       | 0.7471 | 3.11E- | 0.018 | 21.74 |
| 67325 |   |   |   |   | 882    |        | 7     |                    |        | 06     | 1378  | 95536 |
|       |   |   |   |   |        |        |       |                    |        |        |       | 9     |
| rs762 | A | G | A | G | 0.0887 | -0.001 | 0.017 | TRAIL levels       | 0.9619 | 1.56E- | 0.018 | 23.07 |
| 4577  |   |   |   |   | 149    |        | 2     |                    |        | 06     | 4702  | 01245 |
|       |   |   |   |   |        |        |       |                    |        |        |       | 1     |
| rs793 | T | C | T | C | -0.675 | 0.155  | 0.092 | TRAIL levels       | 0.1123 | 6.06E- | 0.124 | 29.34 |
| 59283 |   |   |   |   | 281    | 9      | 2     |                    |        | 08     | 656   | 55792 |
|       |   |   |   |   |        |        |       |                    |        |        |       | 7     |
| rs949 | A | G | A | G | -0.236 | -0.011 | 0.034 | TRAIL levels       | 0.7179 | 7.51E- | 0.040 | 33.39 |
| 425   |   |   |   |   | 542    | 6      | 1     |                    | 99     | 09     | 9301  | 88041 |
|       |   |   |   |   |        |        |       |                    |        |        |       | 9     |
| rs963 | A | G | A | G | -0.091 | -0.012 | 0.015 | TRAIL levels       | 0.4117 | 7.83E- | 0.018 | 24.39 |
| 6516  |   |   |   |   | 094    | 7      | 8     |                    |        | 07     | 4421  | 82569 |
|       |   |   |   |   |        |        |       |                    |        |        |       | 1     |
| rs147 | G | A | G | A | 0.2352 | 0.032  | 0.096 | Tumor necrosis     | 0.7276 | 5.88E- | 0.040 | 33.87 |
| 83909 |   |   |   |   | 19     |        | 1     | factor beta levels | 99     | 09     | 4137  | 56449 |
| 9     |   |   |   |   |        |        |       |                    |        |        |       | 2     |
| rs239 | A | G | A | G | 0.1125 | -0.045 | 0.046 | Tumor necrosis     | 0.3397 | 1.17E- | 0.023 | 23.61 |
| 5184  |   |   |   |   | 27     |        | 7     | factor beta levels |        | 06     | 1544  | 81794 |
|       |   |   |   |   |        |        |       |                    |        |        |       | 5     |
| rs309 | G | A | G | A | -0.088 | 0.035  | 0.036 | Tumor necrosis     | 0.3328 | 1.05E- | 0.018 | 23.83 |
| 8843  |   |   |   |   | 8568   | 8      | 8     | factor beta levels |        | 06     | 1991  | 86422 |
| rs488 | C | T | C | T | 0.1883 | 0.047  | 0.056 | Tumor necrosis     | 0.3923 | 8.65E- | 0.030 | 37.60 |



|                     |   |   |   |   |                |              |            |                                       |               |              |               |                     |
|---------------------|---|---|---|---|----------------|--------------|------------|---------------------------------------|---------------|--------------|---------------|---------------------|
| rs147<br>83909<br>9 | G | A | G | A | 0.2352<br>19   | 0.106<br>1   | 0.063<br>5 | Tumor necrosis<br>factor alpha levels | 0.0939<br>896 | 5.88E-<br>09 | 0.040<br>4137 | 33.87<br>56449<br>2 |
| rs150<br>45080<br>9 | T | C | T | C | 0.2568<br>91   | 0.073        | 0.074<br>3 | Tumor necrosis<br>factor alpha levels | 0.3597        | 4.29E-<br>07 | 0.050<br>8128 | 25.55<br>94512      |
| rs178<br>64109      | A | G | A | G | 0.3051<br>62   | 0.194<br>1   | 0.093<br>3 | Tumor necrosis<br>factor alpha levels | 0.0417<br>398 | 2.78E-<br>06 | 0.065<br>1204 | 21.95<br>97193<br>8 |
| rs239<br>5184       | A | G | A | G | 0.1125<br>27   | -0.029<br>8  | 0.031<br>6 | Tumor necrosis<br>factor alpha levels | 0.3503        | 1.17E-<br>06 | 0.023<br>1544 | 23.61<br>81794<br>5 |
| rs309<br>8843       | G | A | G | A | -0.088<br>8568 | -0.031<br>9  | 0.025<br>3 | Tumor necrosis<br>factor alpha levels | 0.2083        | 1.05E-<br>06 | 0.018<br>1991 | 23.83<br>86422      |
| rs488<br>8362       | C | T | C | T | 0.1883<br>76   | 0.091<br>2   | 0.038<br>4 | Tumor necrosis<br>factor alpha levels | 0.0173<br>8   | 8.65E-<br>10 | 0.030<br>7178 | 37.60<br>71935<br>1 |
| rs498<br>7704       | A | G | A | G | 0.2041<br>51   | -0.015<br>8  | 0.040<br>3 | Tumor necrosis<br>factor alpha levels | 0.6937        | 5.81E-<br>13 | 0.028<br>3357 | 51.90<br>80998<br>6 |
| rs620<br>63640      | A | G | A | G | -0.182<br>72   | 1.00E-<br>04 | 0.049<br>3 | Tumor necrosis<br>factor alpha levels | 0.9956        | 1.48E-<br>06 | 0.037<br>9523 | 23.17<br>90681<br>6 |
| rs737<br>67325      | A | G | A | G | 0.0845<br>882  | -0.015<br>5  | 0.024<br>2 | Tumor necrosis<br>factor alpha levels | 0.5213        | 3.11E-<br>06 | 0.018<br>1378 | 21.74<br>95536<br>9 |

|                     |   |   |   |   |               |             |            |                                                   |               |              |               |                     |
|---------------------|---|---|---|---|---------------|-------------|------------|---------------------------------------------------|---------------|--------------|---------------|---------------------|
| rs762<br>4577       | A | G | A | G | 0.0887<br>149 | -0.022<br>8 | 0.027      | Tumor necrosis<br>factor alpha levels             | 0.4107        | 1.56E-<br>06 | 0.018<br>4702 | 23.07<br>01245<br>1 |
| rs793<br>59283      | T | C | T | C | -0.675<br>281 | 0.280<br>7  | 0.148      | Tumor necrosis<br>factor alpha levels             | 0.0640<br>295 | 6.06E-<br>08 | 0.124<br>656  | 29.34<br>55792<br>7 |
| rs963<br>6516       | A | G | A | G | -0.091<br>094 | -0.007<br>7 | 0.024<br>8 | Tumor necrosis<br>factor alpha levels             | 0.7439<br>01  | 7.83E-<br>07 | 0.018<br>4421 | 24.39<br>82569<br>1 |
| rs113<br>60680<br>1 | T | C | T | C | -0.339<br>477 | 0.071<br>4  | 0.057<br>2 | Stromal-cell-deriv<br>ed factor 1 alpha<br>levels | 0.0512<br>495 | 1.73E-<br>07 | 0.064<br>9534 | 27.31<br>59892<br>2 |
| rs115<br>34381<br>0 | G | A | G | A | 0.3087<br>34  | -0.002<br>8 | 0.089<br>3 | Stromal-cell-deriv<br>ed factor 1 alpha<br>levels | 0.5636        | 4.21E-<br>07 | 0.061<br>0242 | 25.59<br>55655<br>5 |
| rs116<br>74322<br>8 | C | T | C | T | 0.3318<br>17  | 0.003<br>2  | 0.044<br>6 | Stromal-cell-deriv<br>ed factor 1 alpha<br>levels | 0.5287<br>99  | 3.69E-<br>15 | 0.042<br>1888 | 61.85<br>90035<br>1 |
| rs147<br>83909<br>9 | G | A | G | A | 0.2352<br>19  | 0.011       | 0.043      | Stromal-cell-deriv<br>ed factor 1 alpha<br>levels | 0.2952        | 5.88E-<br>09 | 0.040<br>4137 | 33.87<br>56449<br>2 |
| rs150<br>45080<br>9 | T | C | T | C | 0.2568<br>91  | -0.034<br>3 | 0.050<br>5 | Stromal-cell-deriv<br>ed factor 1 alpha<br>levels | 0.7816<br>01  | 4.29E-<br>07 | 0.050<br>8128 | 25.55<br>94512      |
| rs178<br>64109      | A | G | A | G | 0.3051<br>62  | -0.004<br>5 | 0.067<br>5 | Stromal-cell-deriv<br>ed factor 1 alpha           | 0.5259        | 2.78E-<br>06 | 0.065<br>1204 | 21.95<br>97193      |

|             |   |   |   |   |            |         |        |                                                      |        |          |           |             |
|-------------|---|---|---|---|------------|---------|--------|------------------------------------------------------|--------|----------|-----------|-------------|
| rs191041365 | T | C | T | C | 0.427578   | -0.0495 | 0.0846 | levels<br>Stromal-cell-derived factor 1 alpha levels | 0.8832 | 3.22E-15 | 0.0542459 | 62.12935787 |
| rs2395184   | A | G | A | G | 0.112527   | 0.0191  | 0.021  | Stromal-cell-derived factor 1 alpha levels           | 0.1286 | 1.17E-06 | 0.0231544 | 23.61817945 |
| rs3098843   | G | A | G | A | -0.0888568 | -0.0186 | 0.0169 | Stromal-cell-derived factor 1 alpha levels           | 0.4029 | 1.05E-06 | 0.0181991 | 23.8386422  |
| rs4888362   | C | T | C | T | 0.188376   | 0.0178  | 0.0263 | Stromal-cell-derived factor 1 alpha levels           | 0.813  | 8.65E-10 | 0.0307178 | 37.60719351 |
| rs4987704   | A | G | A | G | 0.204151   | 0.0111  | 0.0268 | Stromal-cell-derived factor 1 alpha levels           | 0.2779 | 5.81E-13 | 0.0283357 | 51.90809986 |
| rs62063640  | A | G | A | G | -0.18272   | -0.0147 | 0.0332 | Stromal-cell-derived factor 1 alpha levels           | 0.8104 | 1.48E-06 | 0.0379523 | 23.17906816 |
| rs73767325  | A | G | A | G | 0.0845882  | 0.0119  | 0.0161 | Stromal-cell-derived factor 1 alpha levels           | 0.2757 | 3.11E-06 | 0.0181378 | 21.74955369 |
| rs7624577   | A | G | A | G | 0.0887149  | 0.0227  | 0.0176 | Stromal-cell-derived factor 1 alpha levels           | 0.225  | 1.56E-06 | 0.0184702 | 23.07012451 |
| rs793       | T | C | T | C | -0.675     | 0.138   | 0.095  | Stromal-cell-deriv                                   | 0.4051 | 6.06E-   | 0.124     | 29.34       |



|             |   |   |   |   |           |         |        |                                            |           |          |           |             |
|-------------|---|---|---|---|-----------|---------|--------|--------------------------------------------|-----------|----------|-----------|-------------|
| 59283       |   |   |   |   | 281       | 3       |        | ed factor 1 alpha levels                   |           | 08       | 656       | 55792       |
| rs949425    | A | G | A | G | -0.236542 | 0.0186  | 0.0351 | Stromal-cell-derived factor 1 alpha levels | 0.5185    | 7.51E-09 | 0.0409301 | 33.39880419 |
| rs9636516   | A | G | A | G | -0.091094 | -0.0134 | 0.0163 | Stromal-cell-derived factor 1 alpha levels | 0.653     | 7.83E-07 | 0.0184421 | 24.39825691 |
| rs113606801 | T | C | T | C | -0.339477 | 0.1398  | 0.0819 | Stem cell growth factor beta levels        | 0.0880704 | 1.73E-07 | 0.0649534 | 27.31598922 |
| rs115343810 | G | A | G | A | 0.308734  | -0.1399 | 0.1114 | Stem cell growth factor beta levels        | 0.2038    | 4.21E-07 | 0.0610242 | 25.59556555 |
| rs116743228 | C | T | C | T | 0.331817  | 0.0167  | 0.0626 | Stem cell growth factor beta levels        | 0.7619    | 3.69E-15 | 0.0421888 | 61.85900351 |
| rs147839099 | G | A | G | A | 0.235219  | 0.0085  | 0.0612 | Stem cell growth factor beta levels        | 0.8936    | 5.88E-09 | 0.0404137 | 33.87564492 |
| rs150450809 | T | C | T | C | 0.256891  | 0.0454  | 0.0718 | Stem cell growth factor beta levels        | 0.5283    | 4.29E-07 | 0.0508128 | 25.5594512  |
| rs17864109  | A | G | A | G | 0.305162  | 0.0062  | 0.0906 | Stem cell growth factor beta levels        | 0.9518    | 2.78E-06 | 0.0651204 | 21.95971938 |

|                |   |   |   |   |                |             |            |                                        |               |              |               |                     |
|----------------|---|---|---|---|----------------|-------------|------------|----------------------------------------|---------------|--------------|---------------|---------------------|
| rs239<br>5184  | A | G | A | G | 0.1125<br>27   | -0.065<br>3 | 0.030<br>6 | Stem cell growth<br>factor beta levels | 0.0324<br>601 | 1.17E-<br>06 | 0.023<br>1544 | 23.61<br>81794<br>5 |
| rs309<br>8843  | G | A | G | A | -0.088<br>8568 | -0.058<br>1 | 0.024<br>4 | Stem cell growth<br>factor beta levels | 0.0179<br>201 | 1.05E-<br>06 | 0.018<br>1991 | 23.83<br>86422      |
| rs488<br>8362  | C | T | C | T | 0.1883<br>76   | 0.032<br>5  | 0.037<br>2 | Stem cell growth<br>factor beta levels | 0.3829        | 8.65E-<br>10 | 0.030<br>7178 | 37.60<br>71935<br>1 |
| rs498<br>7704  | A | G | A | G | 0.2041<br>51   | 0.027<br>9  | 0.038<br>9 | Stem cell growth<br>factor beta levels | 0.4733<br>01  | 5.81E-<br>13 | 0.028<br>3357 | 51.90<br>80998<br>6 |
| rs620<br>63640 | A | G | A | G | -0.182<br>72   | -0.038<br>8 | 0.047<br>7 | Stem cell growth<br>factor beta levels | 0.4155        | 1.48E-<br>06 | 0.037<br>9523 | 23.17<br>90681<br>6 |
| rs737<br>67325 | A | G | A | G | 0.0845<br>882  | 0.017<br>5  | 0.023<br>3 | Stem cell growth<br>factor beta levels | 0.452         | 3.11E-<br>06 | 0.018<br>1378 | 21.74<br>95536<br>9 |
| rs762<br>4577  | A | G | A | G | 0.0887<br>149  | 0.010<br>9  | 0.026      | Stem cell growth<br>factor beta levels | 0.6521        | 1.56E-<br>06 | 0.018<br>4702 | 23.07<br>01245<br>1 |
| rs793<br>59283 | T | C | T | C | -0.675<br>281  | -0.060<br>2 | 0.138<br>3 | Stem cell growth<br>factor beta levels | 0.587         | 6.06E-<br>08 | 0.124<br>656  | 29.34<br>55792<br>7 |
| rs963<br>6516  | A | G | A | G | -0.091<br>094  | -0.002<br>2 | 0.024      | Stem cell growth<br>factor beta levels | 0.945         | 7.83E-<br>07 | 0.018<br>4421 | 24.39<br>82569<br>1 |

|                     |   |   |   |   |                |             |            |                            |        |              |               |                     |
|---------------------|---|---|---|---|----------------|-------------|------------|----------------------------|--------|--------------|---------------|---------------------|
| rs113<br>60680<br>1 | T | C | T | C | -0.339<br>477  | 0.032<br>9  | 0.055<br>5 | Stem cell factor<br>levels | 0.5425 | 1.73E-<br>07 | 0.064<br>9534 | 27.31<br>59892<br>2 |
| rs115<br>34381<br>0 | G | A | G | A | 0.3087<br>34   | 0.072<br>6  | 0.075<br>8 | Stem cell factor<br>levels | 0.337  | 4.21E-<br>07 | 0.061<br>0242 | 25.59<br>55655<br>5 |
| rs116<br>74322<br>8 | C | T | C | T | 0.3318<br>17   | 0.034<br>2  | 0.043<br>3 | Stem cell factor<br>levels | 0.4414 | 3.69E-<br>15 | 0.042<br>1888 | 61.85<br>90035<br>1 |
| rs147<br>83909<br>9 | G | A | G | A | 0.2352<br>19   | 0.058<br>5  | 0.041<br>1 | Stem cell factor<br>levels | 0.1479 | 5.88E-<br>09 | 0.040<br>4137 | 33.87<br>56449<br>2 |
| rs150<br>45080<br>9 | T | C | T | C | 0.2568<br>91   | -0.038<br>3 | 0.048<br>8 | Stem cell factor<br>levels | 0.4503 | 4.29E-<br>07 | 0.050<br>8128 | 25.55<br>94512      |
| rs178<br>64109      | A | G | A | G | 0.3051<br>62   | -0.035<br>5 | 0.064<br>1 | Stem cell factor<br>levels | 0.7428 | 2.78E-<br>06 | 0.065<br>1204 | 21.95<br>97193<br>8 |
| rs191<br>04136<br>5 | T | C | T | C | 0.4275<br>78   | -0.04       | 0.082<br>4 | Stem cell factor<br>levels | 0.6296 | 3.22E-<br>15 | 0.054<br>2459 | 62.12<br>93578<br>7 |
| rs239<br>5184       | A | G | A | G | 0.1125<br>27   | 0.018<br>3  | 0.020<br>4 | Stem cell factor<br>levels | 0.3698 | 1.17E-<br>06 | 0.023<br>1544 | 23.61<br>81794<br>5 |
| rs309<br>8843       | G | A | G | A | -0.088<br>8568 | 0.015<br>9  | 0.016<br>3 | Stem cell factor<br>levels | 0.3277 | 1.05E-<br>06 | 0.018<br>1991 | 23.83<br>86422      |

|                     |   |   |   |   |               |              |            |                            |               |              |               |                     |
|---------------------|---|---|---|---|---------------|--------------|------------|----------------------------|---------------|--------------|---------------|---------------------|
| rs488<br>8362       | C | T | C | T | 0.1883<br>76  | -0.052<br>1  | 0.025<br>4 | Stem cell factor<br>levels | 0.0441<br>205 | 8.65E-<br>10 | 0.030<br>7178 | 37.60<br>71935<br>1 |
| rs498<br>7704       | A | G | A | G | 0.2041<br>51  | 0.037        | 0.025<br>9 | Stem cell factor<br>levels | 0.1536        | 5.81E-<br>13 | 0.028<br>3357 | 51.90<br>80998<br>6 |
| rs620<br>63640      | A | G | A | G | -0.182<br>72  | 0.006<br>1   | 0.032<br>2 | Stem cell factor<br>levels | 0.837         | 1.48E-<br>06 | 0.037<br>9523 | 23.17<br>90681<br>6 |
| rs737<br>67325      | A | G | A | G | 0.0845<br>882 | 9.00E-<br>04 | 0.015<br>6 | Stem cell factor<br>levels | 0.9551        | 3.11E-<br>06 | 0.018<br>1378 | 21.74<br>95536<br>9 |
| rs762<br>4577       | A | G | A | G | 0.0887<br>149 | -0.036<br>5  | 0.017      | Stem cell factor<br>levels | 0.0338<br>298 | 1.56E-<br>06 | 0.018<br>4702 | 23.07<br>01245<br>1 |
| rs793<br>59283      | T | C | T | C | -0.675<br>281 | -0.078<br>5  | 0.091<br>4 | Stem cell factor<br>levels | 0.4361        | 6.06E-<br>08 | 0.124<br>656  | 29.34<br>55792<br>7 |
| rs963<br>6516       | A | G | A | G | -0.091<br>094 | 0.010<br>2   | 0.015<br>7 | Stem cell factor<br>levels | 0.5044        | 7.83E-<br>07 | 0.018<br>4421 | 24.39<br>82569<br>1 |
| rs113<br>60680<br>1 | T | C | T | C | -0.339<br>477 | -0.008<br>9  | 0.084<br>5 | Interleukin-16<br>levels   | 0.9306        | 1.73E-<br>07 | 0.064<br>9534 | 27.31<br>59892<br>2 |
| rs115<br>34381      | G | A | G | A | 0.3087<br>34  | 0.082        | 0.116<br>7 | Interleukin-16<br>levels   | 0.4804        | 4.21E-<br>07 | 0.061<br>0242 | 25.59<br>55655      |

|       |   |   |   |   |        |        |       |                |        |        |       |       |       |
|-------|---|---|---|---|--------|--------|-------|----------------|--------|--------|-------|-------|-------|
| 0     |   |   |   |   |        |        |       |                |        |        |       |       | 5     |
| rs116 |   |   |   |   |        |        |       |                |        |        |       |       | 61.85 |
| 74322 | C | T | C | T | 0.3318 | -0.084 | 0.065 | Interleukin-16 | 0.2145 | 3.69E- | 0.042 | 90035 |       |
| 8     |   |   |   |   | 17     | 5      | 2     | levels         |        | 15     | 1888  | 1     |       |
| rs147 |   |   |   |   |        |        |       |                |        |        |       |       | 33.87 |
| 83909 | G | A | G | A | 0.2352 | -0.027 | 0.063 | Interleukin-16 | 0.672  | 5.88E- | 0.040 | 56449 |       |
| 9     |   |   |   |   | 19     | 5      | 3     | levels         |        | 09     | 4137  | 2     |       |
| rs150 |   |   |   |   |        |        |       |                |        |        |       |       | 25.55 |
| 45080 | T | C | T | C | 0.2568 | -0.089 | 0.072 | Interleukin-16 | 0.2342 | 4.29E- | 0.050 | 94512 |       |
| 9     |   |   |   |   | 91     |        | 9     | levels         |        | 07     | 8128  |       |       |
| rs178 |   |   |   |   |        |        |       |                |        |        |       |       | 21.95 |
| 64109 | A | G | A | G | 0.3051 | 0.145  | 0.095 | Interleukin-16 | 0.1306 | 2.78E- | 0.065 | 97193 |       |
|       |   |   |   |   | 62     |        | 9     | levels         |        | 06     | 1204  | 8     |       |
| rs239 |   |   |   |   |        |        |       |                |        |        |       |       | 23.61 |
| 5184  | A | G | A | G | 0.1125 | 0.010  | 0.031 | Interleukin-16 | 0.7373 | 1.17E- | 0.023 | 81794 |       |
|       |   |   |   |   | 27     | 5      | 7     | levels         |        | 06     | 1544  | 5     |       |
| rs309 |   |   |   |   |        |        |       |                |        |        |       |       | 23.83 |
| 8843  | G | A | G | A | -0.088 | 9.00E- | 0.025 | Interleukin-16 | 0.9784 | 1.05E- | 0.018 | 86422 |       |
|       |   |   |   |   | 8568   | 04     |       | levels         |        | 06     | 1991  |       |       |
| rs488 |   |   |   |   |        |        |       |                |        |        |       |       | 37.60 |
| 8362  | C | T | C | T | 0.1883 | 0.027  | 0.037 | Interleukin-16 | 0.4758 | 8.65E- | 0.030 | 71935 |       |
|       |   |   |   |   | 76     |        | 9     | levels         |        | 10     | 7178  | 1     |       |
| rs498 |   |   |   |   |        |        |       |                |        |        |       |       | 51.90 |
| 7704  | A | G | A | G | 0.2041 | 0.023  | 0.040 | Interleukin-16 | 0.5675 | 5.81E- | 0.028 | 80998 |       |
|       |   |   |   |   | 51     |        | 1     | levels         |        | 13     | 3357  | 6     |       |
| rs620 |   |   |   |   |        |        |       |                |        |        |       |       | 23.17 |
| 63640 | A | G | A | G | -0.182 | -0.041 | 0.049 | Interleukin-16 | 0.4039 | 1.48E- | 0.037 | 90681 |       |
|       |   |   |   |   | 72     | 7      | 6     | levels         |        | 06     | 9523  |       |       |

|                     |   |   |   |   |               |              |            |                          |        |              |               |                     |
|---------------------|---|---|---|---|---------------|--------------|------------|--------------------------|--------|--------------|---------------|---------------------|
| rs737<br>67325      | A | G | A | G | 0.0845<br>882 | 6.00E-<br>04 | 0.024      | Interleukin-16<br>levels | 0.983  | 3.11E-<br>06 | 0.018<br>1378 | 21.74<br>95536<br>9 |
| rs762<br>4577       | A | G | A | G | 0.0887<br>149 | 0.004<br>8   | 0.026<br>7 | Interleukin-16<br>levels | 0.846  | 1.56E-<br>06 | 0.018<br>4702 | 23.07<br>01245<br>1 |
| rs793<br>59283      | T | C | T | C | -0.675<br>281 | 0.084<br>1   | 0.142<br>6 | Interleukin-16<br>levels | 0.5944 | 6.06E-<br>08 | 0.124<br>656  | 29.34<br>55792<br>7 |
| rs949<br>425        | A | G | A | G | -0.236<br>542 | -0.068<br>2  | 0.050<br>8 | Interleukin-16<br>levels | 0.1744 | 7.51E-<br>09 | 0.040<br>9301 | 33.39<br>88041<br>9 |
| rs963<br>6516       | A | G | A | G | -0.091<br>094 | 0.003<br>1   | 0.024<br>7 | Interleukin-16<br>levels | 0.9218 | 7.83E-<br>07 | 0.018<br>4421 | 24.39<br>82569<br>1 |
| rs113<br>60680<br>1 | T | C | T | C | -0.339<br>477 | -0.125<br>4  | 0.084      | RANTES levels            | 0.1357 | 1.73E-<br>07 | 0.064<br>9534 | 27.31<br>59892<br>2 |
| rs115<br>34381<br>0 | G | A | G | A | 0.3087<br>34  | -0.184<br>4  | 0.113<br>8 | RANTES levels            | 0.1099 | 4.21E-<br>07 | 0.061<br>0242 | 25.59<br>55655<br>5 |
| rs116<br>74322<br>8 | C | T | C | T | 0.3318<br>17  | 0.034<br>4   | 0.064      | RANTES levels            | 0.5452 | 3.69E-<br>15 | 0.042<br>1888 | 61.85<br>90035<br>1 |
| rs147               | G | A | G | A | 0.2352        | 0.023        | 0.062      | RANTES levels            | 0.7007 | 5.88E-       | 0.040         | 33.87               |

|       |   |   |   |   |        |        |       |               |        |        |        |       |       |
|-------|---|---|---|---|--------|--------|-------|---------------|--------|--------|--------|-------|-------|
| 83909 |   |   |   |   | 19     | 2      | 2     |               |        | 09     | 4137   | 56449 |       |
| 9     |   |   |   |   |        |        |       |               |        |        |        | 2     |       |
| rs150 |   |   |   |   | 0.2568 | 0.149  | 0.074 |               |        | 0.0497 | 4.29E- | 0.050 | 25.55 |
| 45080 | T | C | T | C | 91     | 3      | 4     | RANTES levels | 496    | 07     | 8128   | 94512 |       |
| 9     |   |   |   |   |        |        |       |               |        |        |        |       |       |
| rs178 |   |   |   |   | 0.3051 | 0.100  | 0.094 |               |        | 0.3032 | 2.78E- | 0.065 | 21.95 |
| 64109 | A | G | A | G | 62     | 6      | 8     | RANTES levels |        | 06     | 1204   | 97193 |       |
|       |   |   |   |   |        |        |       |               |        |        |        | 8     |       |
| rs239 |   |   |   |   | 0.1125 | -3.00E | 0.031 |               |        | 0.9983 | 1.17E- | 0.023 | 23.61 |
| 5184  | A | G | A | G | 27     | -04    | 8     | RANTES levels |        | 06     | 1544   | 81794 |       |
|       |   |   |   |   |        |        |       |               |        |        |        | 5     |       |
| rs309 |   |   |   |   | -0.088 | 0.008  | 0.025 |               |        | 0.723  | 1.05E- | 0.018 | 23.83 |
| 8843  | G | A | G | A | 8568   | 7      | 4     | RANTES levels |        | 06     | 1991   | 86422 |       |
|       |   |   |   |   |        |        |       |               |        |        |        |       |       |
| rs488 |   |   |   |   | 0.1883 | 0.022  | 0.038 |               |        | 0.5636 | 8.65E- | 0.030 | 37.60 |
| 8362  | C | T | C | T | 76     | 4      | 8     | RANTES levels |        | 10     | 7178   | 71935 |       |
|       |   |   |   |   |        |        |       |               |        |        |        | 1     |       |
| rs498 |   |   |   |   | 0.2041 | -0.032 | 0.040 |               |        | 0.4204 | 5.81E- | 0.028 | 51.90 |
| 7704  | A | G | A | G | 51     | 4      | 5     | RANTES levels |        | 13     | 3357   | 80998 |       |
|       |   |   |   |   |        |        |       |               |        |        |        | 6     |       |
| rs620 |   |   |   |   | -0.182 | 0.087  | 0.049 |               |        | 0.0773 | 1.48E- | 0.037 | 23.17 |
| 63640 | A | G | A | G | 72     | 1      |       | RANTES levels | 695    | 06     | 9523   | 90681 |       |
|       |   |   |   |   |        |        |       |               |        |        |        | 6     |       |
| rs737 |   |   |   |   | 0.0845 | 0.012  | 0.024 |               |        | 0.6167 | 3.11E- | 0.018 | 21.74 |
| 67325 | A | G | A | G | 882    | 1      | 2     | RANTES levels | 99     | 06     | 1378   | 95536 |       |
|       |   |   |   |   |        |        |       |               |        |        |        | 9     |       |
| rs762 | A | G | A | G | 0.0887 | -0.021 | 0.027 | RANTES levels | 0.4399 | 1.56E- | 0.018  | 23.07 |       |

|       |   |   |   |   |        |        |       |                                          |        |        |       |       |   |
|-------|---|---|---|---|--------|--------|-------|------------------------------------------|--------|--------|-------|-------|---|
| 4577  |   |   |   |   | 149    | 2      | 2     |                                          |        | 06     | 4702  | 01245 |   |
|       |   |   |   |   |        |        |       |                                          |        |        |       |       | 1 |
| rs793 | T | C | T | C | -0.675 | -0.074 | 0.146 | RANTES levels                            | 0.6001 | 6.06E- | 0.124 | 29.34 |   |
| 59283 |   |   |   |   | 281    | 1      | 1     |                                          | 01     | 08     | 656   | 55792 | 7 |
| rs963 | A | G | A | G | -0.091 | -0.042 | 0.024 | RANTES levels                            | 0.0887 | 7.83E- | 0.018 | 24.39 |   |
| 6516  |   |   |   |   | 094    | 5      | 9     |                                          | 606    | 07     | 4421  | 82569 | 1 |
| rs113 | T | C | T | C | -0.339 | -0.092 | 0.055 | Platelet-derived growth factor BB levels | 0.1042 | 1.73E- | 0.064 | 27.31 |   |
| 60680 |   |   |   |   | 477    | 5      | 7     |                                          |        | 07     | 9534  | 59892 | 2 |
| rs115 | G | A | G | A | 0.3087 | 0.006  | 0.076 | Platelet-derived growth factor BB levels | 0.9214 | 4.21E- | 0.061 | 25.59 |   |
| 34381 |   |   |   |   | 34     | 7      | 6     |                                          |        | 07     | 0242  | 55655 | 5 |
| rs116 | C | T | C | T | 0.3318 | 0.029  | 0.043 | Platelet-derived growth factor BB levels | 0.5374 | 3.69E- | 0.042 | 61.85 |   |
| 74322 |   |   |   |   | 17     | 1      | 6     |                                          | 99     | 15     | 1888  | 90035 | 1 |
| rs147 | G | A | G | A | 0.2352 | 0.054  | 0.041 | Platelet-derived growth factor BB levels | 0.2074 | 5.88E- | 0.040 | 33.87 |   |
| 83909 |   |   |   |   | 19     |        | 5     |                                          |        | 09     | 4137  | 56449 | 2 |
| rs150 | T | C | T | C | 0.2568 | -0.034 | 0.048 | Platelet-derived growth factor BB levels | 0.4684 | 4.29E- | 0.050 | 25.55 |   |
| 45080 |   |   |   |   | 91     | 3      | 9     |                                          |        | 07     | 8128  | 94512 |   |
| rs178 | A | G | A | G | 0.3051 | 0.077  | 0.064 | Platelet-derived growth factor BB levels | 0.267  | 2.78E- | 0.065 | 21.95 |   |
| 64109 |   |   |   |   | 62     | 1      |       |                                          |        | 06     | 1204  | 97193 | 8 |



|             |   |   |   |   |            |         |        |                                          |           |          |           |             |
|-------------|---|---|---|---|------------|---------|--------|------------------------------------------|-----------|----------|-----------|-------------|
| rs191041365 | T | C | T | C | 0.427578   | 0.0528  | 0.0844 | Platelet-derived growth factor BB levels | 0.5428    | 3.22E-15 | 0.0542459 | 62.12935787 |
| rs2395184   | A | G | A | G | 0.112527   | 0.0146  | 0.0204 | Platelet-derived growth factor BB levels | 0.4785    | 1.17E-06 | 0.0231544 | 23.61817945 |
| rs3098843   | G | A | G | A | -0.0888568 | -0.0227 | 0.0164 | Platelet-derived growth factor BB levels | 0.1669    | 1.05E-06 | 0.0181991 | 23.8386422  |
| rs4888362   | C | T | C | T | 0.188376   | 0.0024  | 0.0254 | Platelet-derived growth factor BB levels | 0.9437    | 8.65E-10 | 0.0307178 | 37.60719351 |
| rs4987704   | A | G | A | G | 0.204151   | 0.0521  | 0.026  | Platelet-derived growth factor BB levels | 0.0452397 | 5.81E-13 | 0.0283357 | 51.90809986 |
| rs62063640  | A | G | A | G | -0.18272   | 0.0134  | 0.0322 | Platelet-derived growth factor BB levels | 0.6643    | 1.48E-06 | 0.0379523 | 23.17906816 |
| rs73767325  | A | G | A | G | 0.0845882  | 0.0104  | 0.0157 | Platelet-derived growth factor BB levels | 0.5076    | 3.11E-06 | 0.0181378 | 21.74955369 |
| rs7624577   | A | G | A | G | 0.0887149  | 0.0156  | 0.0171 | Platelet-derived growth factor BB levels | 0.3905    | 1.56E-06 | 0.0184702 | 23.07012451 |
| rs79359283  | T | C | T | C | -0.675281  | 0.0638  | 0.0905 | Platelet-derived growth factor BB levels | 0.4673    | 6.06E-08 | 0.124656  | 29.3455792  |

|                     |   |   |   |   |               |             |            |                                                 |              |              |               |                |   |
|---------------------|---|---|---|---|---------------|-------------|------------|-------------------------------------------------|--------------|--------------|---------------|----------------|---|
|                     |   |   |   |   |               |             |            |                                                 | levels       |              |               |                | 7 |
| rs949<br>425        | A | G | A | G | -0.236<br>542 | -0.018<br>3 | 0.033<br>8 | Platelet-derived<br>growth factor BB<br>levels  | 0.5541       | 7.51E-<br>09 | 0.040<br>9301 | 33.39<br>88041 | 9 |
| rs963<br>6516       | A | G | A | G | -0.091<br>094 | 0.023<br>4  | 0.015<br>8 | Platelet-derived<br>growth factor BB<br>levels  | 0.1371       | 7.83E-<br>07 | 0.018<br>4421 | 24.39<br>82569 | 1 |
| rs113<br>60680<br>1 | T | C | T | C | -0.339<br>477 | -0.021<br>6 | 0.056<br>7 | Macrophage<br>inflammatory<br>protein 1b levels | 0.7037<br>01 | 1.73E-<br>07 | 0.064<br>9534 | 27.31<br>59892 | 2 |
| rs115<br>34381<br>0 | G | A | G | A | 0.3087<br>34  | 0.020<br>8  | 0.075<br>9 | Macrophage<br>inflammatory<br>protein 1b levels | 0.7765<br>99 | 4.21E-<br>07 | 0.061<br>0242 | 25.59<br>55655 | 5 |
| rs116<br>74322<br>8 | C | T | C | T | 0.3318<br>17  | 0.040<br>2  | 0.043<br>4 | Macrophage<br>inflammatory<br>protein 1b levels | 0.3234       | 3.69E-<br>15 | 0.042<br>1888 | 61.85<br>90035 | 1 |
| rs147<br>83909<br>9 | G | A | G | A | 0.2352<br>19  | 0.057<br>8  | 0.041<br>1 | Macrophage<br>inflammatory<br>protein 1b levels | 0.1625       | 5.88E-<br>09 | 0.040<br>4137 | 33.87<br>56449 | 2 |
| rs150<br>45080<br>9 | T | C | T | C | 0.2568<br>91  | -0.022<br>8 | 0.049<br>1 | Macrophage<br>inflammatory<br>protein 1b levels | 0.6118<br>99 | 4.29E-<br>07 | 0.050<br>8128 | 25.55<br>94512 |   |
| rs178<br>64109      | A | G | A | G | 0.3051<br>62  | 0.041<br>6  | 0.065      | Macrophage<br>inflammatory<br>protein 1b levels | 0.5882       | 2.78E-<br>06 | 0.065<br>1204 | 21.95<br>97193 | 8 |
| rs191               | T | C | T | C | 0.4275        | 0.09        | 0.082      | Macrophage                                      | 0.2756       | 3.22E-       | 0.054         | 62.12          |   |

|       |   |   |   |   |        |        |       |                   |        |        |       |       |
|-------|---|---|---|---|--------|--------|-------|-------------------|--------|--------|-------|-------|
| 04136 |   |   |   |   | 78     |        | 8     | inflammatory      |        | 15     | 2459  | 93578 |
| 5     |   |   |   |   |        |        |       | protein 1b levels |        |        |       | 7     |
| rs239 | A | G | A | G | 0.1125 | -0.003 | 0.020 | Macrophage        |        |        |       | 23.61 |
| 5184  |   |   |   |   | 27     | 2      | 4     | inflammatory      | 0.8673 | 1.17E- | 0.023 | 81794 |
|       |   |   |   |   |        |        |       | protein 1b levels |        | 06     | 1544  | 5     |
| rs309 | G | A | G | A | -0.088 | -0.020 | 0.016 | Macrophage        |        |        |       | 23.83 |
| 8843  |   |   |   |   | 8568   | 8      | 4     | inflammatory      | 0.2043 | 1.05E- | 0.018 | 86422 |
|       |   |   |   |   |        |        |       | protein 1b levels |        | 06     | 1991  |       |
| rs488 | C | T | C | T | 0.1883 | 0.006  | 0.025 | Macrophage        |        |        |       | 37.60 |
| 8362  |   |   |   |   | 76     | 1      | 5     | inflammatory      | 0.8025 | 8.65E- | 0.030 | 71935 |
|       |   |   |   |   |        |        |       | protein 1b levels |        | 10     | 7178  | 1     |
| rs498 | A | G | A | G | 0.2041 | 0.052  | 0.026 | Macrophage        |        |        |       | 51.90 |
| 7704  |   |   |   |   | 51     | 5      |       | inflammatory      | 0.0435 | 5.81E- | 0.028 | 80998 |
|       |   |   |   |   |        |        |       | protein 1b levels | 101    | 13     | 3357  | 6     |
| rs620 | A | G | A | G | -0.182 | 0.010  | 0.032 | Macrophage        |        |        |       | 23.17 |
| 63640 |   |   |   |   | 72     | 6      | 2     | inflammatory      | 0.7573 | 1.48E- | 0.037 | 90681 |
|       |   |   |   |   |        |        |       | protein 1b levels | 99     | 06     | 9523  | 6     |
| rs737 | A | G | A | G | 0.0845 | -0.022 | 0.015 | Macrophage        |        |        |       | 21.74 |
| 67325 |   |   |   |   | 882    | 8      | 7     | inflammatory      | 0.1451 | 3.11E- | 0.018 | 95536 |
|       |   |   |   |   |        |        |       | protein 1b levels |        | 06     | 1378  | 9     |
| rs762 | A | G | A | G | 0.0887 | 0.021  | 0.017 | Macrophage        |        |        |       | 23.07 |
| 4577  |   |   |   |   | 149    | 8      | 1     | inflammatory      | 0.2056 | 1.56E- | 0.018 | 01245 |
|       |   |   |   |   |        |        |       | protein 1b levels |        | 06     | 4702  | 1     |
| rs793 | T | C | T | C | -0.675 | 0.163  | 0.090 | Macrophage        |        |        |       | 29.34 |
| 59283 |   |   |   |   | 281    | 3      | 9     | inflammatory      | 0.0694 | 6.06E- | 0.124 | 55792 |
|       |   |   |   |   |        |        |       | protein 1b levels | 992    | 08     | 656   | 7     |

|                     |   |   |   |   |               |             |            |                                                 |              |              |               |                     |
|---------------------|---|---|---|---|---------------|-------------|------------|-------------------------------------------------|--------------|--------------|---------------|---------------------|
| rs949<br>425        | A | G | A | G | -0.236<br>542 | -0.004<br>9 | 0.033<br>9 | Macrophage<br>inflammatory<br>protein 1b levels | 0.8849       | 7.51E-<br>09 | 0.040<br>9301 | 33.39<br>88041<br>9 |
| rs963<br>6516       | A | G | A | G | -0.091<br>094 | -0.009<br>2 | 0.015<br>8 | Macrophage<br>inflammatory<br>protein 1b levels | 0.5606       | 7.83E-<br>07 | 0.018<br>4421 | 24.39<br>82569<br>1 |
| rs113<br>60680<br>1 | T | C | T | C | -0.339<br>477 | -0.103<br>2 | 0.083<br>1 | Macrophage<br>inflammatory<br>protein 1a levels | 0.214        | 1.73E-<br>07 | 0.064<br>9534 | 27.31<br>59892<br>2 |
| rs115<br>34381<br>0 | G | A | G | A | 0.3087<br>34  | 0.070<br>9  | 0.113      | Macrophage<br>inflammatory<br>protein 1a levels | 0.5247       | 4.21E-<br>07 | 0.061<br>0242 | 25.59<br>55655<br>5 |
| rs116<br>74322<br>8 | C | T | C | T | 0.3318<br>17  | 0.007<br>1  | 0.063<br>3 | Macrophage<br>inflammatory<br>protein 1a levels | 0.9294       | 3.69E-<br>15 | 0.042<br>1888 | 61.85<br>90035<br>1 |
| rs147<br>83909<br>9 | G | A | G | A | 0.2352<br>19  | 0.088       | 0.061<br>4 | Macrophage<br>inflammatory<br>protein 1a levels | 0.1529       | 5.88E-<br>09 | 0.040<br>4137 | 33.87<br>56449<br>2 |
| rs150<br>45080<br>9 | T | C | T | C | 0.2568<br>91  | -0.017<br>6 | 0.073<br>3 | Macrophage<br>inflammatory<br>protein 1a levels | 0.7420<br>99 | 4.29E-<br>07 | 0.050<br>8128 | 25.55<br>94512      |
| rs178<br>64109      | A | G | A | G | 0.3051<br>62  | 0.017<br>7  | 0.092<br>4 | Macrophage<br>inflammatory<br>protein 1a levels | 0.8605       | 2.78E-<br>06 | 0.065<br>1204 | 21.95<br>97193<br>8 |
| rs239<br>5184       | A | G | A | G | 0.1125<br>27  | -0.028<br>8 | 0.031<br>3 | Macrophage<br>inflammatory                      | 0.362        | 1.17E-<br>06 | 0.023<br>1544 | 23.61<br>81794      |

|                |   |   |   |   |                |             |            |                            |                   |              |               |                |   |
|----------------|---|---|---|---|----------------|-------------|------------|----------------------------|-------------------|--------------|---------------|----------------|---|
|                |   |   |   |   |                |             |            |                            | protein 1a levels |              |               |                | 5 |
| rs309<br>8843  | G | A | G | A | -0.088<br>8568 | -0.045<br>9 | 0.025      | Macrophage<br>inflammatory | 0.0655<br>194     | 1.05E-<br>06 | 0.018<br>1991 | 23.83<br>86422 |   |
| rs488<br>8362  | C | T | C | T | 0.1883<br>76   | 0.068<br>5  | 0.038      | Macrophage<br>inflammatory | 0.0713<br>001     | 8.65E-<br>10 | 0.030<br>7178 | 37.60<br>71935 |   |
| rs498<br>7704  | A | G | A | G | 0.2041<br>51   | 0.022<br>9  | 0.040<br>1 | Macrophage<br>inflammatory | 0.5684<br>99      | 5.81E-<br>13 | 0.028<br>3357 | 51.90<br>80998 |   |
| rs620<br>63640 | A | G | A | G | -0.182<br>72   | 0.038<br>9  | 0.049<br>1 | Macrophage<br>inflammatory | 0.4438            | 1.48E-<br>06 | 0.037<br>9523 | 23.17<br>90681 |   |
| rs737<br>67325 | A | G | A | G | 0.0845<br>882  | -0.021<br>3 | 0.024      | Macrophage<br>inflammatory | 0.3732            | 3.11E-<br>06 | 0.018<br>1378 | 21.74<br>95536 |   |
| rs762<br>4577  | A | G | A | G | 0.0887<br>149  | 0.033<br>2  | 0.026<br>7 | Macrophage<br>inflammatory | 0.2195            | 1.56E-<br>06 | 0.018<br>4702 | 23.07<br>01245 |   |
| rs793<br>59283 | T | C | T | C | -0.675<br>281  | 0.238<br>8  | 0.144<br>1 | Macrophage<br>inflammatory | 0.1079            | 6.06E-<br>08 | 0.124<br>656  | 29.34<br>55792 |   |
| rs963<br>6516  | A | G | A | G | -0.091<br>094  | -0.033<br>6 | 0.024<br>6 | Macrophage<br>inflammatory | 0.1659            | 7.83E-<br>07 | 0.018<br>4421 | 24.39<br>82569 |   |
| rs113          | T | C | T | C | -0.339         | 0.029       | 0.083      | Monokine induced           | 0.721             | 1.73E-       | 0.064         | 27.31          |   |

|       |   |   |   |   |        |        |       |                   |        |        |       |       |
|-------|---|---|---|---|--------|--------|-------|-------------------|--------|--------|-------|-------|
| 60680 |   |   |   |   | 477    | 6      | 7     | by gamma          |        | 07     | 9534  | 59892 |
| 1     |   |   |   |   |        |        |       | interferon levels |        |        |       | 2     |
| rs115 |   |   |   |   | 0.3087 | 0.324  | 0.112 | Monokine induced  | 0.0039 | 4.21E- | 0.061 | 25.59 |
| 34381 | G | A | G | A | 34     | 4      | 6     | by gamma          | 4203   | 07     | 0242  | 55655 |
| 0     |   |   |   |   |        |        |       | interferon levels |        |        |       | 5     |
| rs116 |   |   |   |   | 0.3318 | 0.013  |       | Monokine induced  |        | 3.69E- | 0.042 | 61.85 |
| 74322 | C | T | C | T | 17     | 6      | 0.063 | by gamma          | 0.8487 | 15     | 1888  | 90035 |
| 8     |   |   |   |   |        |        |       | interferon levels |        |        |       | 1     |
| rs147 |   |   |   |   | 0.2352 | 0.004  | 0.061 | Monokine induced  |        | 5.88E- | 0.040 | 33.87 |
| 83909 | G | A | G | A | 19     | 1      | 5     | by gamma          | 0.9517 | 09     | 4137  | 56449 |
| 9     |   |   |   |   |        |        |       | interferon levels |        |        |       | 2     |
| rs150 |   |   |   |   | 0.2568 | -0.003 | 0.071 | Monokine induced  |        | 4.29E- | 0.050 | 25.55 |
| 45080 | T | C | T | C | 91     | 4      | 6     | by gamma          | 0.9433 | 07     | 8128  | 94512 |
| 9     |   |   |   |   |        |        |       | interferon levels |        |        |       |       |
| rs178 |   |   |   |   | 0.3051 | -0.02  | 0.091 | Monokine induced  |        | 2.78E- | 0.065 | 21.95 |
| 64109 | A | G | A | G | 62     |        | 2     | by gamma          | 0.8399 | 06     | 1204  | 97193 |
|       |   |   |   |   |        |        |       | interferon levels |        |        |       | 8     |
| rs239 |   |   |   |   | 0.1125 | -0.004 | 0.030 | Monokine induced  |        | 1.17E- | 0.023 | 23.61 |
| 5184  | A | G | A | G | 27     | 4      | 6     | by gamma          | 0.8883 | 06     | 1544  | 81794 |
|       |   |   |   |   |        |        |       | interferon levels |        |        |       | 5     |
| rs309 |   |   |   |   | -0.088 | 0.009  | 0.024 | Monokine induced  |        | 1.05E- | 0.018 | 23.83 |
| 8843  | G | A | G | A | 8568   | 4      | 5     | by gamma          | 0.7013 | 06     | 1991  | 86422 |
|       |   |   |   |   |        |        |       | interferon levels |        |        |       |       |
| rs488 |   |   |   |   | 0.1883 | -0.041 | 0.037 | Monokine induced  |        | 8.65E- | 0.030 | 37.60 |
| 8362  | C | T | C | T | 76     | 5      | 1     | by gamma          | 0.264  | 10     | 7178  | 71935 |
|       |   |   |   |   |        |        |       | interferon levels |        |        |       | 1     |

|                     |   |   |   |   |               |             |            |                                                   |              |              |               |                     |
|---------------------|---|---|---|---|---------------|-------------|------------|---------------------------------------------------|--------------|--------------|---------------|---------------------|
| rs498<br>7704       | A | G | A | G | 0.2041<br>51  | 0.037<br>7  | 0.038<br>8 | Monokine induced<br>by gamma<br>interferon levels | 0.3289       | 5.81E-<br>13 | 0.028<br>3357 | 51.90<br>80998<br>6 |
| rs620<br>63640      | A | G | A | G | -0.182<br>72  | 0.013<br>9  | 0.047<br>7 | Monokine induced<br>by gamma<br>interferon levels | 0.7653<br>01 | 1.48E-<br>06 | 0.037<br>9523 | 23.17<br>90681<br>6 |
| rs737<br>67325      | A | G | A | G | 0.0845<br>882 | -0.008<br>9 | 0.023<br>3 | Monokine induced<br>by gamma<br>interferon levels | 0.6984       | 3.11E-<br>06 | 0.018<br>1378 | 21.74<br>95536<br>9 |
| rs762<br>4577       | A | G | A | G | 0.0887<br>149 | 0.012<br>3  | 0.026<br>1 | Monokine induced<br>by gamma<br>interferon levels | 0.6045       | 1.56E-<br>06 | 0.018<br>4702 | 23.07<br>01245<br>1 |
| rs793<br>59283      | T | C | T | C | -0.675<br>281 | -0.008<br>1 | 0.139<br>9 | Monokine induced<br>by gamma<br>interferon levels | 0.9675       | 6.06E-<br>08 | 0.124<br>656  | 29.34<br>55792<br>7 |
| rs949<br>425        | A | G | A | G | -0.236<br>542 | 0.073<br>7  | 0.049<br>9 | Monokine induced<br>by gamma<br>interferon levels | 0.1439       | 7.51E-<br>09 | 0.040<br>9301 | 33.39<br>88041<br>9 |
| rs963<br>6516       | A | G | A | G | -0.091<br>094 | -0.017      | 0.024      | Monokine induced<br>by gamma<br>interferon levels | 0.4872       | 7.83E-<br>07 | 0.018<br>4421 | 24.39<br>82569<br>1 |
| rs113<br>60680<br>1 | T | C | T | C | -0.339<br>477 | -0.013<br>6 | 0.098<br>2 | Macrophage<br>colony stimulating<br>factor levels | 0.9379       | 1.73E-<br>07 | 0.064<br>9534 | 27.31<br>59892<br>2 |
| rs115<br>34381      | G | A | G | A | 0.3087<br>34  | 0.156<br>9  | 0.132<br>9 | Macrophage<br>colony stimulating                  | 0.2364       | 4.21E-<br>07 | 0.061<br>0242 | 25.59<br>55655      |

|       |   |   |   |   |        |        |       |        |                    |        |       |       |       |
|-------|---|---|---|---|--------|--------|-------|--------|--------------------|--------|-------|-------|-------|
| 0     |   |   |   |   |        |        |       |        | factor levels      |        |       |       | 5     |
| rs116 |   |   |   |   |        |        |       |        | Macrophage         |        |       |       | 61.85 |
| 74322 | C | T | C | T | 0.3318 | 0.074  | 0.076 | 0.3399 | colony stimulating | 3.69E- | 0.042 | 90035 |       |
| 8     |   |   |   |   | 17     | 5      | 8     |        | factor levels      | 15     | 1888  |       | 1     |
| rs147 |   |   |   |   |        |        |       |        | Macrophage         |        |       |       | 33.87 |
| 83909 | G | A | G | A | 0.2352 | 0.059  | 0.074 | 0.4216 | colony stimulating | 5.88E- | 0.040 | 56449 |       |
| 9     |   |   |   |   | 19     | 6      | 4     |        | factor levels      | 09     | 4137  |       | 2     |
| rs150 |   |   |   |   |        |        |       |        | Macrophage         |        |       |       | 25.55 |
| 45080 | T | C | T | C | 0.2568 | -0.123 | 0.089 | 0.1686 | colony stimulating | 4.29E- | 0.050 | 94512 |       |
| 9     |   |   |   |   | 91     | 1      | 7     |        | factor levels      | 07     | 8128  |       | 25.55 |
| rs178 |   |   |   |   |        |        |       |        | Macrophage         |        |       |       | 21.95 |
| 64109 | A | G | A | G | 0.3051 | 0.063  | 0.114 | 0.5779 | colony stimulating | 2.78E- | 0.065 | 97193 |       |
|       |   |   |   |   | 62     | 3      | 6     |        | factor levels      | 06     | 1204  |       | 8     |
| rs239 |   |   |   |   |        |        |       |        | Macrophage         |        |       |       | 23.61 |
| 5184  | A | G | A | G | 0.1125 | 0.018  | 0.037 | 0.6156 | colony stimulating | 1.17E- | 0.023 | 81794 |       |
|       |   |   |   |   | 27     | 8      | 4     |        | factor levels      | 01     | 06    | 1544  | 5     |
| rs309 |   |   |   |   |        |        |       |        | Macrophage         |        |       |       | 23.83 |
| 8843  | G | A | G | A | -0.088 | -0.021 | 0.029 | 0.4683 | colony stimulating | 1.05E- | 0.018 | 86422 |       |
|       |   |   |   |   | 8568   | 4      | 5     |        | factor levels      | 06     | 1991  |       | 23.83 |
| rs488 |   |   |   |   |        |        |       |        | Macrophage         |        |       |       | 37.60 |
| 8362  | C | T | C | T | 0.1883 | -0.001 | 0.045 | 0.9589 | colony stimulating | 8.65E- | 0.030 | 71935 |       |
|       |   |   |   |   | 76     | 3      | 5     |        | factor levels      | 10     | 7178  |       | 1     |
| rs498 |   |   |   |   |        |        |       |        | Macrophage         |        |       |       | 51.90 |
| 7704  | A | G | A | G | 0.2041 | -0.051 | 0.047 | 0.2769 | colony stimulating | 5.81E- | 0.028 | 80998 |       |
|       |   |   |   |   | 51     | 4      | 3     |        | factor levels      | 13     | 3357  |       | 6     |
| rs620 | A | G | A | G | -0.182 | -0.042 | 0.059 | 0.4727 | Macrophage         | 1.48E- | 0.037 | 23.17 |       |





|                |   |   |   |   |                |             |            |                                                 |              |              |               |                     |
|----------------|---|---|---|---|----------------|-------------|------------|-------------------------------------------------|--------------|--------------|---------------|---------------------|
| rs309<br>8843  | G | A | G | A | -0.088<br>8568 | -0.013<br>9 | 0.045<br>4 | Monocyte<br>chemoattractant<br>protein-3 levels | 0.7615       | 1.05E-<br>06 | 0.018<br>1991 | 23.83<br>86422      |
| rs488<br>8362  | C | T | C | T | 0.1883<br>76   | 0.083<br>3  | 0.070<br>9 | Monocyte<br>chemoattractant<br>protein-3 levels | 0.2389       | 8.65E-<br>10 | 0.030<br>7178 | 37.60<br>71935<br>1 |
| rs498<br>7704  | A | G | A | G | 0.2041<br>51   | 0.004<br>6  | 0.071<br>3 | Monocyte<br>chemoattractant<br>protein-3 levels | 0.9444       | 5.81E-<br>13 | 0.028<br>3357 | 51.90<br>80998<br>6 |
| rs620<br>63640 | A | G | A | G | -0.182<br>72   | 0.063<br>1  | 0.091<br>3 | Monocyte<br>chemoattractant<br>protein-3 levels | 0.4823       | 1.48E-<br>06 | 0.037<br>9523 | 23.17<br>90681<br>6 |
| rs737<br>67325 | A | G | A | G | 0.0845<br>882  | 0.054       | 0.043<br>6 | Monocyte<br>chemoattractant<br>protein-3 levels | 0.2093       | 3.11E-<br>06 | 0.018<br>1378 | 21.74<br>95536<br>9 |
| rs762<br>4577  | A | G | A | G | 0.0887<br>149  | -0.069<br>8 | 0.047<br>7 | Monocyte<br>chemoattractant<br>protein-3 levels | 0.1439       | 1.56E-<br>06 | 0.018<br>4702 | 23.07<br>01245<br>1 |
| rs949<br>425   | A | G | A | G | -0.236<br>542  | 0.076<br>7  | 0.089<br>2 | Monocyte<br>chemoattractant<br>protein-3 levels | 0.3981       | 7.51E-<br>09 | 0.040<br>9301 | 33.39<br>88041<br>9 |
| rs963<br>6516  | A | G | A | G | -0.091<br>094  | -0.033<br>2 | 0.044<br>8 | Monocyte<br>chemoattractant<br>protein-3 levels | 0.4556       | 7.83E-<br>07 | 0.018<br>4421 | 24.39<br>82569<br>1 |
| rs113<br>60680 | T | C | T | C | -0.339<br>477  | 0.020<br>3  | 0.055<br>8 | Monocyte<br>chemoattractant                     | 0.7308<br>01 | 1.73E-<br>07 | 0.064<br>9534 | 27.31<br>59892      |

|       |   |   |   |   |        |        |       |        |                  |        |       |       |       |
|-------|---|---|---|---|--------|--------|-------|--------|------------------|--------|-------|-------|-------|
| 1     |   |   |   |   |        |        |       |        | protein-1 levels |        |       |       | 2     |
| rs115 |   |   |   |   |        |        |       |        | Monocyte         |        |       |       | 25.59 |
| 34381 | G | A | G | A | 0.3087 | 0.109  | 0.076 | 0.1564 | chemoattractant  | 4.21E- | 0.061 | 55655 |       |
| 0     |   |   |   |   | 34     | 7      |       |        | protein-1 levels | 07     | 0242  | 5     |       |
| rs116 |   |   |   |   |        |        |       |        | Monocyte         |        |       |       | 61.85 |
| 74322 | C | T | C | T | 0.3318 | 0.010  | 0.043 | 0.7835 | chemoattractant  | 3.69E- | 0.042 | 90035 |       |
| 8     |   |   |   |   | 17     | 9      | 5     |        | protein-1 levels | 15     | 1888  | 1     |       |
| rs147 |   |   |   |   |        |        |       |        | Monocyte         |        |       |       | 33.87 |
| 83909 | G | A | G | A | 0.2352 | 0.022  | 0.041 | 0.5884 | chemoattractant  | 5.88E- | 0.040 | 56449 |       |
| 9     |   |   |   |   | 19     | 2      |       |        | protein-1 levels | 99     | 4137  | 2     |       |
| rs150 |   |   |   |   |        |        |       |        | Monocyte         |        |       |       | 25.55 |
| 45080 | T | C | T | C | 0.2568 | -0.018 | 0.049 | 0.6881 | chemoattractant  | 4.29E- | 0.050 | 25.55 |       |
| 9     |   |   |   |   | 91     | 7      | 1     |        | protein-1 levels | 01     | 8128  | 94512 |       |
| rs178 |   |   |   |   |        |        |       |        | Monocyte         |        |       |       | 21.95 |
| 64109 | A | G | A | G | 0.3051 | 0.076  | 0.064 | 0.267  | chemoattractant  | 2.78E- | 0.065 | 97193 |       |
|       |   |   |   |   | 62     |        | 8     |        | protein-1 levels | 06     | 1204  | 8     |       |
| rs191 |   |   |   |   |        |        |       |        | Monocyte         |        |       |       | 62.12 |
| 04136 | T | C | T | C | 0.4275 | 0.037  | 0.082 | 0.6473 | chemoattractant  | 3.22E- | 0.054 | 93578 |       |
| 5     |   |   |   |   | 78     | 6      |       |        | protein-1 levels | 01     | 2459  | 7     |       |
| rs239 |   |   |   |   |        |        |       |        | Monocyte         |        |       |       | 23.61 |
| 5184  | A | G | A | G | 0.1125 | 0.047  | 0.020 | 0.0198 | chemoattractant  | 1.17E- | 0.023 | 81794 |       |
|       |   |   |   |   | 27     | 3      | 5     |        | protein-1 levels | 701    | 1544  | 5     |       |
| rs309 |   |   |   |   |        |        |       |        | Monocyte         |        |       |       | 23.83 |
| 8843  | G | A | G | A | -0.088 | -0.010 | 0.016 | 0.5214 | chemoattractant  | 1.05E- | 0.018 | 86422 |       |
|       |   |   |   |   | 8568   | 6      | 4     |        | protein-1 levels | 06     | 1991  |       |       |
| rs488 | C | T | C | T | 0.1883 | -0.019 | 0.025 | 0.4571 | Monocyte         | 8.65E- | 0.030 | 37.60 |       |



|                     |   |   |   |   |                |              |            |                             |        |              |               |                     |
|---------------------|---|---|---|---|----------------|--------------|------------|-----------------------------|--------|--------------|---------------|---------------------|
| rs115<br>34381<br>0 | G | A | G | A | 0.3087<br>34   | 0.111        | 0.075<br>6 | Interleukin-12p70<br>levels | 0.1406 | 4.21E-<br>07 | 0.061<br>0242 | 25.59<br>55655<br>5 |
| rs116<br>74322<br>8 | C | T | C | T | 0.3318<br>17   | 5.00E-<br>04 | 0.043<br>5 | Interleukin-12p70<br>levels | 0.9779 | 3.69E-<br>15 | 0.042<br>1888 | 61.85<br>90035<br>1 |
| rs147<br>83909<br>9 | G | A | G | A | 0.2352<br>19   | 0.065<br>2   | 0.041      | Interleukin-12p70<br>levels | 0.1146 | 5.88E-<br>09 | 0.040<br>4137 | 33.87<br>56449<br>2 |
| rs150<br>45080<br>9 | T | C | T | C | 0.2568<br>91   | 0.029<br>8   | 0.049      | Interleukin-12p70<br>levels | 0.5549 | 4.29E-<br>07 | 0.050<br>8128 | 25.55<br>94512      |
| rs178<br>64109      | A | G | A | G | 0.3051<br>62   | 0.055<br>1   | 0.063<br>9 | Interleukin-12p70<br>levels | 0.4599 | 2.78E-<br>06 | 0.065<br>1204 | 21.95<br>97193<br>8 |
| rs191<br>04136<br>5 | T | C | T | C | 0.4275<br>78   | 0.128<br>5   | 0.083<br>2 | Interleukin-12p70<br>levels | 0.1222 | 3.22E-<br>15 | 0.054<br>2459 | 62.12<br>93578<br>7 |
| rs239<br>5184       | A | G | A | G | 0.1125<br>27   | 0.023<br>3   | 0.020<br>4 | Interleukin-12p70<br>levels | 0.2541 | 1.17E-<br>06 | 0.023<br>1544 | 23.61<br>81794<br>5 |
| rs309<br>8843       | G | A | G | A | -0.088<br>8568 | -0.019<br>1  | 0.016<br>4 | Interleukin-12p70<br>levels | 0.2429 | 1.05E-<br>06 | 0.018<br>1991 | 23.83<br>86422      |
| rs488<br>8362       | C | T | C | T | 0.1883<br>76   | -0.005       | 0.025<br>5 | Interleukin-12p70<br>levels | 0.8129 | 8.65E-<br>10 | 0.030<br>7178 | 37.60<br>71935<br>1 |

|                     |   |   |   |   |               |             |            |                                                  |               |              |               |                     |
|---------------------|---|---|---|---|---------------|-------------|------------|--------------------------------------------------|---------------|--------------|---------------|---------------------|
| rs498<br>7704       | A | G | A | G | 0.2041<br>51  | 0.033<br>5  | 0.026      | Interleukin-12p70<br>levels                      | 0.2012        | 5.81E-<br>13 | 0.028<br>3357 | 51.90<br>80998<br>6 |
| rs620<br>63640      | A | G | A | G | -0.182<br>72  | -0.007<br>2 | 0.032<br>2 | Interleukin-12p70<br>levels                      | 0.8323        | 1.48E-<br>06 | 0.037<br>9523 | 23.17<br>90681<br>6 |
| rs737<br>67325      | A | G | A | G | 0.0845<br>882 | -0.010<br>9 | 0.015<br>7 | Interleukin-12p70<br>levels                      | 0.4877        | 3.11E-<br>06 | 0.018<br>1378 | 21.74<br>95536<br>9 |
| rs762<br>4577       | A | G | A | G | 0.0887<br>149 | 0.010<br>6  | 0.017<br>2 | Interleukin-12p70<br>levels                      | 0.5642        | 1.56E-<br>06 | 0.018<br>4702 | 23.07<br>01245<br>1 |
| rs793<br>59283      | T | C | T | C | -0.675<br>281 | 0.090<br>8  | 0.091<br>9 | Interleukin-12p70<br>levels                      | 0.3254        | 6.06E-<br>08 | 0.124<br>656  | 29.34<br>55792<br>7 |
| rs949<br>425        | A | G | A | G | -0.236<br>542 | -0.028<br>3 | 0.033<br>9 | Interleukin-12p70<br>levels                      | 0.3974        | 7.51E-<br>09 | 0.040<br>9301 | 33.39<br>88041<br>9 |
| rs963<br>6516       | A | G | A | G | -0.091<br>094 | -0.006<br>1 | 0.015<br>8 | Interleukin-12p70<br>levels                      | 0.6865<br>01  | 7.83E-<br>07 | 0.018<br>4421 | 24.39<br>82569<br>1 |
| rs113<br>60680<br>1 | T | C | T | C | -0.339<br>477 | 0.140<br>1  | 0.081<br>9 | Interferon<br>gamma-induced<br>protein 10 levels | 0.0867<br>301 | 1.73E-<br>07 | 0.064<br>9534 | 27.31<br>59892<br>2 |
| rs115<br>34381      | G | A | G | A | 0.3087<br>34  | 0.266<br>3  | 0.112<br>5 | Interferon<br>gamma-induced                      | 0.0168<br>601 | 4.21E-<br>07 | 0.061<br>0242 | 25.59<br>55655      |

|       |   |   |   |   |        |        |       |  |                   |        |        |       |       |
|-------|---|---|---|---|--------|--------|-------|--|-------------------|--------|--------|-------|-------|
| 0     |   |   |   |   |        |        |       |  | protein 10 levels |        |        |       | 5     |
| rs116 |   |   |   |   |        |        |       |  | Interferon        |        |        |       | 61.85 |
| 74322 | C | T | C | T | 0.3318 | -0.043 | 0.063 |  | gamma-induced     | 0.5139 | 3.69E- | 0.042 | 90035 |
| 8     |   |   |   |   | 17     |        | 1     |  | protein 10 levels |        | 15     | 1888  | 1     |
| rs147 |   |   |   |   |        |        |       |  | Interferon        |        |        |       | 33.87 |
| 83909 | G | A | G | A | 0.2352 | 0.004  | 0.061 |  | gamma-induced     | 0.9444 | 5.88E- | 0.040 | 56449 |
| 9     |   |   |   |   | 19     | 9      | 1     |  | protein 10 levels |        | 09     | 4137  | 2     |
| rs150 |   |   |   |   |        |        |       |  | Interferon        |        |        |       | 25.55 |
| 45080 | T | C | T | C | 0.2568 | -0.026 | 0.071 |  | gamma-induced     | 0.7173 | 4.29E- | 0.050 | 94512 |
| 9     |   |   |   |   | 91     | 5      | 5     |  | protein 10 levels |        | 99     | 8128  | 2     |
| rs178 |   |   |   |   |        |        |       |  | Interferon        |        |        |       | 21.95 |
| 64109 | A | G | A | G | 0.3051 | 0.009  | 0.091 |  | gamma-induced     | 0.8677 | 2.78E- | 0.065 | 97193 |
|       |   |   |   |   | 62     | 3      | 2     |  | protein 10 levels |        | 06     | 1204  | 8     |
| rs239 |   |   |   |   |        |        |       |  | Interferon        |        |        |       | 23.61 |
| 5184  | A | G | A | G | 0.1125 | 0.010  | 0.030 |  | gamma-induced     | 0.7151 | 1.17E- | 0.023 | 81794 |
|       |   |   |   |   | 27     | 9      | 7     |  | protein 10 levels |        | 06     | 1544  | 5     |
| rs309 |   |   |   |   |        |        |       |  | Interferon        |        |        |       | 23.83 |
| 8843  | G | A | G | A | -0.088 | -0.044 | 0.024 |  | gamma-induced     | 0.0723 | 1.05E- | 0.018 | 86422 |
|       |   |   |   |   | 8568   | 1      | 5     |  | protein 10 levels |        | 702    | 1991  | 2     |
| rs488 |   |   |   |   |        |        |       |  | Interferon        |        |        |       | 37.60 |
| 8362  | C | T | C | T | 0.1883 | 0.026  | 0.037 |  | gamma-induced     | 0.4822 | 8.65E- | 0.030 | 71935 |
|       |   |   |   |   | 76     | 1      | 1     |  | protein 10 levels |        | 10     | 7178  | 1     |
| rs498 |   |   |   |   |        |        |       |  | Interferon        |        |        |       | 51.90 |
| 7704  | A | G | A | G | 0.2041 | 0.055  | 0.039 |  | gamma-induced     | 0.1523 | 5.81E- | 0.028 | 80998 |
|       |   |   |   |   | 51     | 8      |       |  | protein 10 levels |        | 13     | 3357  | 6     |
| rs620 | A | G | A | G | -0.182 | -0.059 | 0.047 |  | Interferon        | 0.2167 | 1.48E- | 0.037 | 23.17 |

|       |   |   |   |   |        |        |       |                                 |        |          |       |       |
|-------|---|---|---|---|--------|--------|-------|---------------------------------|--------|----------|-------|-------|
| 63640 |   |   |   |   | 72     |        | 8     | gamma-induced protein 10 levels |        | 06       | 9523  | 90681 |
| rs737 | A | G | A | G | 0.0845 | -0.001 | 0.023 | Interferon                      |        |          |       | 21.74 |
| 67325 |   |   |   |   | 882    | 1      | 3     | gamma-induced protein 10 levels | 0.9609 | 3.11E-06 | 0.018 | 95536 |
| rs762 | A | G | A | G | 0.0887 | 0.009  | 0.026 | Interferon                      |        |          |       | 23.07 |
| 4577  |   |   |   |   | 149    | 6      | 1     | gamma-induced protein 10 levels | 0.7152 | 1.56E-06 | 0.018 | 01245 |
| rs793 | T | C | T | C | -0.675 | -0.051 | 0.140 | Interferon                      |        |          |       | 29.34 |
| 59283 |   |   |   |   | 281    |        | 6     | gamma-induced protein 10 levels | 0.8007 | 6.06E-08 | 0.124 | 55792 |
| rs949 | A | G | A | G | -0.236 | 0.097  | 0.050 | Interferon                      |        |          |       | 33.39 |
| 425   |   |   |   |   | 542    | 8      | 2     | gamma-induced protein 10 levels | 0.0522 | 7.51E-09 | 0.040 | 88041 |
| rs963 | A | G | A | G | -0.091 | -0.009 | 0.024 | Interferon                      |        |          |       | 24.39 |
| 6516  |   |   |   |   | 094    | 7      |       | gamma-induced protein 10 levels | 0.6729 | 7.83E-07 | 0.018 | 82569 |
| rs113 | T | C | T | C | -0.339 | 0.144  | 0.082 | Interleukin-18                  |        |          |       | 27.31 |
| 60680 |   |   |   |   | 477    | 9      | 9     | levels                          | 0.0788 | 1.73E-07 | 0.064 | 59892 |
| 1     |   |   |   |   |        |        |       |                                 | 297    | 9534     | 2     |       |
| rs115 | G | A | G | A | 0.3087 | 0.088  | 0.111 | Interleukin-18                  |        |          |       | 25.59 |
| 34381 |   |   |   |   | 34     | 1      | 6     | levels                          | 0.4176 | 4.21E-07 | 0.061 | 55655 |
| 0     |   |   |   |   |        |        |       |                                 |        | 0242     | 5     |       |
| rs116 | C | T | C | T | 0.3318 | 0.077  | 0.063 | Interleukin-18                  |        |          |       | 61.85 |
| 74322 |   |   |   |   | 17     | 3      | 3     | levels                          | 0.2288 | 3.69E-15 | 0.042 | 90035 |
| 8     |   |   |   |   |        |        |       |                                 |        | 1888     | 1     |       |



|                     |   |   |   |   |                |             |            |                          |              |              |               |                     |
|---------------------|---|---|---|---|----------------|-------------|------------|--------------------------|--------------|--------------|---------------|---------------------|
| rs147<br>83909<br>9 | G | A | G | A | 0.2352<br>19   | 0.025<br>7  | 0.062<br>3 | Interleukin-18<br>levels | 0.6849       | 5.88E-<br>09 | 0.040<br>4137 | 33.87<br>56449<br>2 |
| rs150<br>45080<br>9 | T | C | T | C | 0.2568<br>91   | 0.036<br>1  | 0.071<br>9 | Interleukin-18<br>levels | 0.6224<br>01 | 4.29E-<br>07 | 0.050<br>8128 | 25.55<br>94512      |
| rs178<br>64109      | A | G | A | G | 0.3051<br>62   | 0.074<br>5  | 0.091<br>2 | Interleukin-18<br>levels | 0.3896       | 2.78E-<br>06 | 0.065<br>1204 | 21.95<br>97193<br>8 |
| rs239<br>5184       | A | G | A | G | 0.1125<br>27   | 0.014<br>1  | 0.030<br>8 | Interleukin-18<br>levels | 0.6517       | 1.17E-<br>06 | 0.023<br>1544 | 23.61<br>81794<br>5 |
| rs309<br>8843       | G | A | G | A | -0.088<br>8568 | 0.014<br>2  | 0.024<br>5 | Interleukin-18<br>levels | 0.5608       | 1.05E-<br>06 | 0.018<br>1991 | 23.83<br>86422      |
| rs488<br>8362       | C | T | C | T | 0.1883<br>76   | -0.028      | 0.037<br>4 | Interleukin-18<br>levels | 0.4524       | 8.65E-<br>10 | 0.030<br>7178 | 37.60<br>71935<br>1 |
| rs498<br>7704       | A | G | A | G | 0.2041<br>51   | 0.055       | 0.039<br>3 | Interleukin-18<br>levels | 0.1618       | 5.81E-<br>13 | 0.028<br>3357 | 51.90<br>80998<br>6 |
| rs620<br>63640      | A | G | A | G | -0.182<br>72   | -0.025<br>6 | 0.048<br>2 | Interleukin-18<br>levels | 0.6153       | 1.48E-<br>06 | 0.037<br>9523 | 23.17<br>90681<br>6 |
| rs737<br>67325      | A | G | A | G | 0.0845<br>882  | 0.019<br>5  | 0.023<br>5 | Interleukin-18<br>levels | 0.4099       | 3.11E-<br>06 | 0.018<br>1378 | 21.74<br>95536<br>9 |

|                     |   |   |   |   |               |             |            |                          |              |              |               |                     |
|---------------------|---|---|---|---|---------------|-------------|------------|--------------------------|--------------|--------------|---------------|---------------------|
| rs762<br>4577       | A | G | A | G | 0.0887<br>149 | -0.031<br>5 | 0.026<br>3 | Interleukin-18<br>levels | 0.2234       | 1.56E-<br>06 | 0.018<br>4702 | 23.07<br>01245<br>1 |
| rs793<br>59283      | T | C | T | C | -0.675<br>281 | 0.151<br>6  | 0.142<br>2 | Interleukin-18<br>levels | 0.2777       | 6.06E-<br>08 | 0.124<br>656  | 29.34<br>55792<br>7 |
| rs949<br>425        | A | G | A | G | -0.236<br>542 | -0.064<br>2 | 0.050<br>2 | Interleukin-18<br>levels | 0.209        | 7.51E-<br>09 | 0.040<br>9301 | 33.39<br>88041<br>9 |
| rs963<br>6516       | A | G | A | G | -0.091<br>094 | 0.019<br>8  | 0.024<br>2 | Interleukin-18<br>levels | 0.41         | 7.83E-<br>07 | 0.018<br>4421 | 24.39<br>82569<br>1 |
| rs113<br>60680<br>1 | T | C | T | C | -0.339<br>477 | -0.062<br>1 | 0.056<br>9 | Interleukin-17<br>levels | 0.28         | 1.73E-<br>07 | 0.064<br>9534 | 27.31<br>59892<br>2 |
| rs115<br>34381<br>0 | G | A | G | A | 0.3087<br>34  | 0.118       | 0.078<br>8 | Interleukin-17<br>levels | 0.1291       | 4.21E-<br>07 | 0.061<br>0242 | 25.59<br>55655<br>5 |
| rs116<br>74322<br>8 | C | T | C | T | 0.3318<br>17  | -0.001<br>3 | 0.044<br>6 | Interleukin-17<br>levels | 0.9784       | 3.69E-<br>15 | 0.042<br>1888 | 61.85<br>90035<br>1 |
| rs147<br>83909<br>9 | G | A | G | A | 0.2352<br>19  | 0.041<br>4  | 0.042<br>4 | Interleukin-17<br>levels | 0.3442       | 5.88E-<br>09 | 0.040<br>4137 | 33.87<br>56449<br>2 |
| rs150<br>45080      | T | C | T | C | 0.2568<br>91  | -0.018<br>3 | 0.050<br>2 | Interleukin-17<br>levels | 0.6775<br>99 | 4.29E-<br>07 | 0.050<br>8128 | 25.55<br>94512      |

9

|                     |   |   |   |   |                |               |            |                          |                |              |               |                     |
|---------------------|---|---|---|---|----------------|---------------|------------|--------------------------|----------------|--------------|---------------|---------------------|
| rs178<br>64109      | A | G | A | G | 0.3051<br>62   | 0.024<br>2    | 0.066<br>8 | Interleukin-17<br>levels | 0.7991         | 2.78E-<br>06 | 0.065<br>1204 | 21.95<br>97193<br>8 |
| rs191<br>04136<br>5 | T | C | T | C | 0.4275<br>78   | 0.017         | 0.084<br>5 | Interleukin-17<br>levels | 0.8398         | 3.22E-<br>15 | 0.054<br>2459 | 62.12<br>93578<br>7 |
| rs239<br>5184       | A | G | A | G | 0.1125<br>27   | 0.017<br>3    | 0.021      | Interleukin-17<br>levels | 0.4057         | 1.17E-<br>06 | 0.023<br>1544 | 23.61<br>81794<br>5 |
| rs309<br>8843       | G | A | G | A | -0.088<br>8568 | -0.022        | 0.016<br>9 | Interleukin-17<br>levels | 0.1954         | 1.05E-<br>06 | 0.018<br>1991 | 23.83<br>86422      |
| rs488<br>8362       | C | T | C | T | 0.1883<br>76   | -4.00E<br>-04 | 0.026<br>2 | Interleukin-17<br>levels | 0.9746         | 8.65E-<br>10 | 0.030<br>7178 | 37.60<br>71935<br>1 |
| rs498<br>7704       | A | G | A | G | 0.2041<br>51   | 0.016<br>2    | 0.026<br>6 | Interleukin-17<br>levels | 0.5494         | 5.81E-<br>13 | 0.028<br>3357 | 51.90<br>80998<br>6 |
| rs620<br>63640      | A | G | A | G | -0.182<br>72   | 0.038<br>1    | 0.033<br>1 | Interleukin-17<br>levels | 0.2563         | 1.48E-<br>06 | 0.037<br>9523 | 23.17<br>90681<br>6 |
| rs737<br>67325      | A | G | A | G | 0.0845<br>882  | -0.003<br>6   | 0.016<br>2 | Interleukin-17<br>levels | 0.8241         | 3.11E-<br>06 | 0.018<br>1378 | 21.74<br>95536<br>9 |
| rs762<br>4577       | A | G | A | G | 0.0887<br>149  | 0.046<br>1    | 0.017<br>7 | Interleukin-17<br>levels | 0.0095<br>7701 | 1.56E-<br>06 | 0.018<br>4702 | 23.07<br>01245      |

|       |   |   |   |   |        |        |       |                |        |        |       |       |
|-------|---|---|---|---|--------|--------|-------|----------------|--------|--------|-------|-------|
| rs793 | T | C | T | C | -0.675 | 0.071  | 0.094 | Interleukin-17 | 0.4411 | 6.06E- | 0.124 | 1     |
| 59283 |   |   |   |   | 281    | 7      | 9     | levels         | 99     | 08     | 656   | 29.34 |
|       |   |   |   |   |        |        |       |                |        |        |       | 55792 |
|       |   |   |   |   |        |        |       |                |        |        |       | 7     |
| rs963 | A | G | A | G | -0.091 | -0.002 | 0.016 | Interleukin-17 | 0.8369 | 7.83E- | 0.018 | 24.39 |
| 6516  |   |   |   |   | 094    | 8      | 3     | levels         |        | 07     | 4421  | 82569 |
|       |   |   |   |   |        |        |       |                |        |        |       | 1     |
| rs113 | T | C | T | C | -0.339 | -0.059 | 0.081 | Interleukin-13 | 0.475  | 1.73E- | 0.064 | 27.31 |
| 60680 |   |   |   |   | 477    |        | 9     | levels         |        | 07     | 9534  | 59892 |
| 1     |   |   |   |   |        |        |       |                |        |        |       | 2     |
| rs115 | G | A | G | A | 0.3087 | 0.092  | 0.111 | Interleukin-13 | 0.4034 | 4.21E- | 0.061 | 25.59 |
| 34381 |   |   |   |   | 34     |        | 8     | levels         |        | 07     | 0242  | 55655 |
| 0     |   |   |   |   |        |        |       |                |        |        |       | 5     |
| rs116 | C | T | C | T | 0.3318 | -0.025 | 0.063 | Interleukin-13 | 0.6862 | 3.69E- | 0.042 | 61.85 |
| 74322 |   |   |   |   | 17     | 7      | 8     | levels         |        | 15     | 1888  | 90035 |
| 8     |   |   |   |   |        |        |       |                |        |        |       | 1     |
| rs147 | G | A | G | A | 0.2352 | 0.124  | 0.062 | Interleukin-13 | 0.0439 | 5.88E- | 0.040 | 33.87 |
| 83909 |   |   |   |   | 19     | 9      | 1     | levels         | 997    | 09     | 4137  | 56449 |
| 9     |   |   |   |   |        |        |       |                |        |        |       | 2     |
| rs150 | T | C | T | C | 0.2568 | -0.008 | 0.073 | Interleukin-13 | 0.8782 | 4.29E- | 0.050 | 25.55 |
| 45080 |   |   |   |   | 91     | 3      |       | levels         |        | 07     | 8128  | 94512 |
| 9     |   |   |   |   |        |        |       |                |        |        |       |       |
| rs178 | A | G | A | G | 0.3051 | 0.156  | 0.093 | Interleukin-13 | 0.101  | 2.78E- | 0.065 | 21.95 |
| 64109 |   |   |   |   | 62     | 8      | 3     | levels         |        | 06     | 1204  | 97193 |
|       |   |   |   |   |        |        |       |                |        |        |       | 8     |
| rs239 | A | G | A | G | 0.1125 | -0.017 | 0.031 | Interleukin-13 | 0.5961 | 1.17E- | 0.023 | 23.61 |

|       |   |   |   |   |        |        |       |                |        |        |       |       |
|-------|---|---|---|---|--------|--------|-------|----------------|--------|--------|-------|-------|
| 5184  |   |   |   |   | 27     | 1      | 2     | levels         |        | 06     | 1544  | 81794 |
|       |   |   |   |   |        |        |       |                |        |        |       | 5     |
| rs309 | G | A | G | A | -0.088 | -0.028 | 0.024 | Interleukin-13 | 0.2503 | 1.05E- | 0.018 | 23.83 |
| 8843  |   |   |   |   | 8568   | 6      | 9     | levels         |        | 06     | 1991  | 86422 |
|       |   |   |   |   |        |        |       |                |        |        |       | 37.60 |
| rs488 | C | T | C | T | 0.1883 | 0.061  | 0.037 | Interleukin-13 | 0.102  | 8.65E- | 0.030 | 71935 |
| 8362  |   |   |   |   | 76     | 8      | 8     | levels         |        | 10     | 7178  | 1     |
|       |   |   |   |   |        |        |       |                |        |        |       | 51.90 |
| rs498 | A | G | A | G | 0.2041 | 0.039  | 0.039 | Interleukin-13 | 0.3204 | 5.81E- | 0.028 | 80998 |
| 7704  |   |   |   |   | 51     | 4      | 7     | levels         |        | 13     | 3357  | 6     |
|       |   |   |   |   |        |        |       |                |        |        |       | 23.17 |
| rs620 | A | G | A | G | -0.182 | -0.025 | 0.048 | Interleukin-13 | 0.6017 | 1.48E- | 0.037 | 90681 |
| 63640 |   |   |   |   | 72     | 6      | 6     | levels         |        | 06     | 9523  | 6     |
|       |   |   |   |   |        |        |       |                |        |        |       | 21.74 |
| rs737 | A | G | A | G | 0.0845 | -0.025 | 0.023 | Interleukin-13 | 0.2946 | 3.11E- | 0.018 | 95536 |
| 67325 |   |   |   |   | 882    |        | 8     | levels         |        | 06     | 1378  | 9     |
|       |   |   |   |   |        |        |       |                |        |        |       | 23.07 |
| rs762 | A | G | A | G | 0.0887 | -0.001 | 0.026 | Interleukin-13 | 0.9665 | 1.56E- | 0.018 | 01245 |
| 4577  |   |   |   |   | 149    | 1      | 6     | levels         |        | 06     | 4702  | 1     |
|       |   |   |   |   |        |        |       |                |        |        |       | 29.34 |
| rs793 | T | C | T | C | -0.675 | 0.106  | 0.140 | Interleukin-13 | 0.4686 | 6.06E- | 0.124 | 55792 |
| 59283 |   |   |   |   | 281    | 3      | 3     | levels         |        | 08     | 656   | 7     |
|       |   |   |   |   |        |        |       |                |        |        |       | 24.39 |
| rs963 | A | G | A | G | -0.091 | -0.005 | 0.024 | Interleukin-13 | 0.8227 | 7.83E- | 0.018 | 82569 |
| 6516  |   |   |   |   | 094    | 2      | 5     | levels         |        | 07     | 4421  | 1     |
|       |   |   |   |   |        |        |       |                |        |        |       | 27.31 |
| rs113 | T | C | T | C | -0.339 | -0.029 | 0.056 | Interleukin-10 | 0.6086 | 1.73E- | 0.064 |       |





|                     |   |   |   |   |                |             |            |                         |                |              |               |                     |
|---------------------|---|---|---|---|----------------|-------------|------------|-------------------------|----------------|--------------|---------------|---------------------|
| rs115<br>34381<br>0 | G | A | G | A | 0.3087<br>34   | 0.183<br>2  | 0.114<br>8 | Interleukin-8<br>levels | 0.1107         | 4.21E-<br>07 | 0.061<br>0242 | 25.59<br>55655<br>5 |
| rs116<br>74322<br>8 | C | T | C | T | 0.3318<br>17   | 0.061<br>9  | 0.063<br>5 | Interleukin-8<br>levels | 0.3382         | 3.69E-<br>15 | 0.042<br>1888 | 61.85<br>90035<br>1 |
| rs147<br>83909<br>9 | G | A | G | A | 0.2352<br>19   | 0.197<br>9  | 0.062<br>6 | Interleukin-8<br>levels | 0.0016<br>3599 | 5.88E-<br>09 | 0.040<br>4137 | 33.87<br>56449<br>2 |
| rs150<br>45080<br>9 | T | C | T | C | 0.2568<br>91   | 0.001<br>6  | 0.073      | Interleukin-8<br>levels | 0.9857         | 4.29E-<br>07 | 0.050<br>8128 | 25.55<br>94512      |
| rs178<br>64109      | A | G | A | G | 0.3051<br>62   | 0.074<br>2  | 0.092<br>7 | Interleukin-8<br>levels | 0.4588         | 2.78E-<br>06 | 0.065<br>1204 | 21.95<br>97193<br>8 |
| rs239<br>5184       | A | G | A | G | 0.1125<br>27   | -0.019<br>6 | 0.031<br>2 | Interleukin-8<br>levels | 0.537          | 1.17E-<br>06 | 0.023<br>1544 | 23.61<br>81794<br>5 |
| rs309<br>8843       | G | A | G | A | -0.088<br>8568 | -0.001<br>4 | 0.024<br>9 | Interleukin-8<br>levels | 0.9563         | 1.05E-<br>06 | 0.018<br>1991 | 23.83<br>86422      |
| rs488<br>8362       | C | T | C | T | 0.1883<br>76   | 0.028<br>7  | 0.037<br>9 | Interleukin-8<br>levels | 0.4496         | 8.65E-<br>10 | 0.030<br>7178 | 37.60<br>71935<br>1 |
| rs498<br>7704       | A | G | A | G | 0.2041<br>51   | -0.042<br>9 | 0.039<br>9 | Interleukin-8<br>levels | 0.2822         | 5.81E-<br>13 | 0.028<br>3357 | 51.90<br>80998<br>6 |



|                     |   |   |   |   |               |             |            |                         |               |              |               |                     |
|---------------------|---|---|---|---|---------------|-------------|------------|-------------------------|---------------|--------------|---------------|---------------------|
| rs620<br>63640      | A | G | A | G | -0.182<br>72  | 0.008<br>7  | 0.048<br>7 | Interleukin-8<br>levels | 0.8654        | 1.48E-<br>06 | 0.037<br>9523 | 23.17<br>90681<br>6 |
| rs737<br>67325      | A | G | A | G | 0.0845<br>882 | -0.006<br>3 | 0.023<br>9 | Interleukin-8<br>levels | 0.7901        | 3.11E-<br>06 | 0.018<br>1378 | 21.74<br>95536<br>9 |
| rs762<br>4577       | A | G | A | G | 0.0887<br>149 | 0.022<br>9  | 0.026<br>6 | Interleukin-8<br>levels | 0.377         | 1.56E-<br>06 | 0.018<br>4702 | 23.07<br>01245<br>1 |
| rs793<br>59283      | T | C | T | C | -0.675<br>281 | 0.287<br>3  | 0.147<br>9 | Interleukin-8<br>levels | 0.0568<br>801 | 6.06E-<br>08 | 0.124<br>656  | 29.34<br>55792<br>7 |
| rs963<br>6516       | A | G | A | G | -0.091<br>094 | -0.014      | 0.024<br>5 | Interleukin-8<br>levels | 0.5695        | 7.83E-<br>07 | 0.018<br>4421 | 24.39<br>82569<br>1 |
| rs113<br>60680<br>1 | T | C | T | C | -0.339<br>477 | -0.035<br>1 | 0.055<br>8 | Interleukin-6<br>levels | 0.5353        | 1.73E-<br>07 | 0.064<br>9534 | 27.31<br>59892<br>2 |
| rs115<br>34381<br>0 | G | A | G | A | 0.3087<br>34  | 0.133<br>7  | 0.076<br>2 | Interleukin-6<br>levels | 0.0786<br>702 | 4.21E-<br>07 | 0.061<br>0242 | 25.59<br>55655<br>5 |
| rs116<br>74322<br>8 | C | T | C | T | 0.3318<br>17  | 0.009<br>4  | 0.043<br>7 | Interleukin-6<br>levels | 0.8083        | 3.69E-<br>15 | 0.042<br>1888 | 61.85<br>90035<br>1 |
| rs147<br>83909      | G | A | G | A | 0.2352<br>19  | 0.021<br>5  | 0.041<br>7 | Interleukin-6<br>levels | 0.6304        | 5.88E-<br>09 | 0.040<br>4137 | 33.87<br>56449      |

|             |   |   |   |   |            |         |        |                      |           |          |           |             |   |
|-------------|---|---|---|---|------------|---------|--------|----------------------|-----------|----------|-----------|-------------|---|
| 9           |   |   |   |   |            |         |        |                      |           |          |           |             | 2 |
| rs150450809 | T | C | T | C | 0.256891   | 0.0795  | 0.0492 | Interleukin-6 levels | 0.1131    | 4.29E-07 | 0.0508128 | 25.5594512  |   |
| rs17864109  | A | G | A | G | 0.305162   | 0.0885  | 0.065  | Interleukin-6 levels | 0.2361    | 2.78E-06 | 0.0651204 | 21.95971938 |   |
| rs2395184   | A | G | A | G | 0.112527   | 0.0238  | 0.0206 | Interleukin-6 levels | 0.2422    | 1.17E-06 | 0.0231544 | 23.61817945 |   |
| rs3098843   | G | A | G | A | -0.0888568 | 0.0062  | 0.0165 | Interleukin-6 levels | 0.7047    | 1.05E-06 | 0.0181991 | 23.8386422  |   |
| rs4888362   | C | T | C | T | 0.188376   | 0.001   | 0.0256 | Interleukin-6 levels | 0.9996    | 8.65E-10 | 0.0307178 | 37.60719351 |   |
| rs4987704   | A | G | A | G | 0.204151   | 0.0361  | 0.0261 | Interleukin-6 levels | 0.1659    | 5.81E-13 | 0.0283357 | 51.90809986 |   |
| rs62063640  | A | G | A | G | -0.18272   | 0.017   | 0.0324 | Interleukin-6 levels | 0.593     | 1.48E-06 | 0.0379523 | 23.17906816 |   |
| rs73767325  | A | G | A | G | 0.0845882  | -0.0055 | 0.0158 | Interleukin-6 levels | 0.7275    | 3.11E-06 | 0.0181378 | 21.74955369 |   |
| rs7624577   | A | G | A | G | 0.0887149  | 0.0378  | 0.0172 | Interleukin-6 levels | 0.0291998 | 1.56E-06 | 0.0184702 | 23.0701245  |   |

|       |   |   |   |   |        |        |       |                    |        |        |       |       |
|-------|---|---|---|---|--------|--------|-------|--------------------|--------|--------|-------|-------|
| rs793 | T | C | T | C | -0.675 | 0.054  | 0.092 | Interleukin-6      | 0.5489 | 6.06E- | 0.124 | 1     |
| 59283 |   |   |   |   | 281    |        | 6     | levels             |        | 08     | 656   | 29.34 |
| rs963 | A | G | A | G | -0.091 | -0.033 | 0.015 | Interleukin-6      | 0.0338 | 7.83E- | 0.018 | 24.39 |
| 6516  |   |   |   |   | 094    | 5      | 9     | levels             | 501    | 07     | 4421  | 82569 |
| rs113 | T | C | T | C | -0.339 | -0.151 | 0.082 | Interleukin-1-rece | 0.0693 | 1.73E- | 0.064 | 27.31 |
| 60680 |   |   |   |   | 477    | 4      | 9     | ptor antagonist    | 506    | 07     | 9534  | 59892 |
| 1     |   |   |   |   |        |        |       | levels             |        |        |       | 2     |
| rs115 | G | A | G | A | 0.3087 | 0.136  | 0.111 | Interleukin-1-rece | 0.2232 | 4.21E- | 0.061 | 25.59 |
| 34381 |   |   |   |   | 34     | 1      | 8     | ptor antagonist    |        | 07     | 0242  | 55655 |
| 0     |   |   |   |   |        |        |       | levels             |        |        |       | 5     |
| rs116 | C | T | C | T | 0.3318 | -0.031 | 0.063 | Interleukin-1-rece | 0.5957 | 3.69E- | 0.042 | 61.85 |
| 74322 |   |   |   |   | 17     | 6      | 1     | ptor antagonist    | 01     | 15     | 1888  | 90035 |
| 8     |   |   |   |   |        |        |       | levels             |        |        |       | 1     |
| rs147 | G | A | G | A | 0.2352 | 0.086  | 0.061 | Interleukin-1-rece | 0.1654 | 5.88E- | 0.040 | 33.87 |
| 83909 |   |   |   |   | 19     | 1      | 7     | ptor antagonist    |        | 09     | 4137  | 56449 |
| 9     |   |   |   |   |        |        |       | levels             |        |        |       | 2     |
| rs150 | T | C | T | C | 0.2568 | -0.042 | 0.072 | Interleukin-1-rece | 0.5227 | 4.29E- | 0.050 | 25.55 |
| 45080 |   |   |   |   | 91     | 3      | 4     | ptor antagonist    | 01     | 07     | 8128  | 94512 |
| 9     |   |   |   |   |        |        |       | levels             |        |        |       |       |
| rs178 | A | G | A | G | 0.3051 | 0.240  | 0.091 | Interleukin-1-rece | 0.0119 | 2.78E- | 0.065 | 21.95 |
| 64109 |   |   |   |   | 62     | 3      | 7     | ptor antagonist    | 3      | 06     | 1204  | 97193 |
|       |   |   |   |   |        |        |       | levels             |        |        |       | 8     |
| rs239 | A | G | A | G | 0.1125 | -4.00E | 0.030 | Interleukin-1-rece | 0.9851 | 1.17E- | 0.023 | 23.61 |

|                |   |   |   |   |                |             |            |                                          |        |              |               |                     |
|----------------|---|---|---|---|----------------|-------------|------------|------------------------------------------|--------|--------------|---------------|---------------------|
| 5184           |   |   |   |   | 27             | -04         | 9          | ptor antagonist levels                   |        | 06           | 1544          | 81794               |
|                |   |   |   |   |                |             |            |                                          |        |              |               | 5                   |
| rs309<br>8843  | G | A | G | A | -0.088<br>8568 | 0.010<br>9  | 0.024<br>6 | Interleukin-1-receptor antagonist levels | 0.6642 | 1.05E-<br>06 | 0.018<br>1991 | 23.83<br>86422      |
| rs488<br>8362  | C | T | C | T | 0.1883<br>76   | 0.054<br>6  | 0.037<br>3 | Interleukin-1-receptor antagonist levels | 0.1432 | 8.65E-<br>10 | 0.030<br>7178 | 37.60<br>71935<br>1 |
| rs498<br>7704  | A | G | A | G | 0.2041<br>51   | 0.013<br>4  | 0.039      | Interleukin-1-receptor antagonist levels | 0.7317 | 5.81E-<br>13 | 0.028<br>3357 | 51.90<br>80998<br>6 |
| rs620<br>63640 | A | G | A | G | -0.182<br>72   | 0.041<br>9  | 0.048<br>2 | Interleukin-1-receptor antagonist levels | 0.3798 | 1.48E-<br>06 | 0.037<br>9523 | 23.17<br>90681<br>6 |
| rs737<br>67325 | A | G | A | G | 0.0845<br>882  | -0.024      | 0.023<br>5 | Interleukin-1-receptor antagonist levels | 0.3071 | 3.11E-<br>06 | 0.018<br>1378 | 21.74<br>95536<br>9 |
| rs762<br>4577  | A | G | A | G | 0.0887<br>149  | 0.023<br>2  | 0.026<br>4 | Interleukin-1-receptor antagonist levels | 0.3853 | 1.56E-<br>06 | 0.018<br>4702 | 23.07<br>01245<br>1 |
| rs793<br>59283 | T | C | T | C | -0.675<br>281  | 0.106<br>3  | 0.138<br>5 | Interleukin-1-receptor antagonist levels | 0.4011 | 6.06E-<br>08 | 0.124<br>656  | 29.34<br>55792<br>7 |
| rs963<br>6516  | A | G | A | G | -0.091<br>094  | -0.021<br>7 | 0.024<br>2 | Interleukin-1-receptor antagonist levels | 0.366  | 7.83E-<br>07 | 0.018<br>4421 | 24.39<br>82569<br>1 |

|                     |   |   |   |   |                |             |            |                              |                |              |               |                     |
|---------------------|---|---|---|---|----------------|-------------|------------|------------------------------|----------------|--------------|---------------|---------------------|
| rs113<br>60680<br>1 | T | C | T | C | -0.339<br>477  | -0.116<br>3 | 0.065<br>3 | Interleukin-1-beta<br>levels | 0.0237<br>898  | 1.73E-<br>07 | 0.064<br>9534 | 27.31<br>59892<br>2 |
| rs115<br>34381<br>0 | G | A | G | A | 0.3087<br>34   | 0.073<br>4  | 0.088<br>6 | Interleukin-1-beta<br>levels | 0.9604         | 4.21E-<br>07 | 0.061<br>0242 | 25.59<br>55655<br>5 |
| rs116<br>74322<br>8 | C | T | C | T | 0.3318<br>17   | 0.047<br>6  | 0.050<br>3 | Interleukin-1-beta<br>levels | 0.7114         | 3.69E-<br>15 | 0.042<br>1888 | 61.85<br>90035<br>1 |
| rs147<br>83909<br>9 | G | A | G | A | 0.2352<br>19   | 0.092       | 0.049<br>1 | Interleukin-1-beta<br>levels | 0.0782<br>492  | 5.88E-<br>09 | 0.040<br>4137 | 33.87<br>56449<br>2 |
| rs150<br>45080<br>9 | T | C | T | C | 0.2568<br>91   | -0.012<br>9 | 0.057<br>8 | Interleukin-1-beta<br>levels | 0.4129         | 4.29E-<br>07 | 0.050<br>8128 | 25.55<br>94512      |
| rs178<br>64109      | A | G | A | G | 0.3051<br>62   | 0.196<br>8  | 0.073<br>6 | Interleukin-1-beta<br>levels | 0.0026<br>6698 | 2.78E-<br>06 | 0.065<br>1204 | 21.95<br>97193<br>8 |
| rs191<br>04136<br>5 | T | C | T | C | 0.4275<br>78   | 0.207<br>9  | 0.125<br>5 | Interleukin-1-beta<br>levels | 0.1079         | 3.22E-<br>15 | 0.054<br>2459 | 62.12<br>93578<br>7 |
| rs239<br>5184       | A | G | A | G | 0.1125<br>27   | 0.010<br>3  | 0.024<br>4 | Interleukin-1-beta<br>levels | 0.894          | 1.17E-<br>06 | 0.023<br>1544 | 23.61<br>81794<br>5 |
| rs309<br>8843       | G | A | G | A | -0.088<br>8568 | -0.005<br>1 | 0.019<br>5 | Interleukin-1-beta<br>levels | 0.7769         | 1.05E-<br>06 | 0.018<br>1991 | 23.83<br>86422      |

|                     |   |   |   |   |               |             |            |                                       |               |              |               |                     |
|---------------------|---|---|---|---|---------------|-------------|------------|---------------------------------------|---------------|--------------|---------------|---------------------|
| rs488<br>8362       | C | T | C | T | 0.1883<br>76  | 0.027<br>4  | 0.029<br>8 | Interleukin-1-beta<br>levels          | 0.215         | 8.65E-<br>10 | 0.030<br>7178 | 37.60<br>71935<br>1 |
| rs498<br>7704       | A | G | A | G | 0.2041<br>51  | -0.048      | 0.031<br>2 | Interleukin-1-beta<br>levels          | 0.2809        | 5.81E-<br>13 | 0.028<br>3357 | 51.90<br>80998<br>6 |
| rs620<br>63640      | A | G | A | G | -0.182<br>72  | -0.014<br>6 | 0.038<br>4 | Interleukin-1-beta<br>levels          | 0.9153        | 1.48E-<br>06 | 0.037<br>9523 | 23.17<br>90681<br>6 |
| rs737<br>67325      | A | G | A | G | 0.0845<br>882 | -0.014<br>2 | 0.018<br>6 | Interleukin-1-beta<br>levels          | 0.5808<br>01  | 3.11E-<br>06 | 0.018<br>1378 | 21.74<br>95536<br>9 |
| rs762<br>4577       | A | G | A | G | 0.0887<br>149 | 0.015<br>8  | 0.020<br>8 | Interleukin-1-beta<br>levels          | 0.0960<br>793 | 1.56E-<br>06 | 0.018<br>4702 | 23.07<br>01245<br>1 |
| rs793<br>59283      | T | C | T | C | -0.675<br>281 | 0.075<br>1  | 0.119<br>2 | Interleukin-1-beta<br>levels          | 0.4448        | 6.06E-<br>08 | 0.124<br>656  | 29.34<br>55792<br>7 |
| rs963<br>6516       | A | G | A | G | -0.091<br>094 | -0.030<br>7 | 0.019<br>3 | Interleukin-1-beta<br>levels          | 0.2988        | 7.83E-<br>07 | 0.018<br>4421 | 24.39<br>82569<br>1 |
| rs113<br>60680<br>1 | T | C | T | C | -0.339<br>477 | 0.038<br>3  | 0.056      | Hepatocyte<br>growth factor<br>levels | 0.4938        | 1.73E-<br>07 | 0.064<br>9534 | 27.31<br>59892<br>2 |
| rs115<br>34381      | G | A | G | A | 0.3087<br>34  | 0.008<br>8  | 0.076<br>2 | Hepatocyte<br>growth factor           | 0.9082        | 4.21E-<br>07 | 0.061<br>0242 | 25.59<br>55655      |

|       |   |   |   |   |        |        |       |  |               |        |        |       |       |
|-------|---|---|---|---|--------|--------|-------|--|---------------|--------|--------|-------|-------|
| 0     |   |   |   |   |        |        |       |  | levels        |        |        |       | 5     |
| rs116 |   |   |   |   |        |        |       |  | Hepatocyte    |        |        |       | 61.85 |
| 74322 | C | T | C | T | 0.3318 | -0.013 | 0.043 |  | growth factor | 0.7473 | 3.69E- | 0.042 | 90035 |
| 8     |   |   |   |   | 17     | 8      | 5     |  | levels        |        | 15     | 1888  | 1     |
| rs147 |   |   |   |   |        |        |       |  | Hepatocyte    |        |        |       | 33.87 |
| 83909 | G | A | G | A | 0.2352 | 0.003  | 0.041 |  | growth factor | 0.9316 | 5.88E- | 0.040 | 56449 |
| 9     |   |   |   |   | 19     | 8      | 5     |  | levels        |        | 09     | 4137  | 2     |
| rs150 |   |   |   |   |        |        |       |  | Hepatocyte    |        |        |       | 25.55 |
| 45080 | T | C | T | C | 0.2568 | -0.018 | 0.048 |  | growth factor | 0.7068 | 4.29E- | 0.050 | 25.55 |
| 9     |   |   |   |   | 91     | 7      | 8     |  | levels        | 01     | 07     | 8128  | 94512 |
| rs178 |   |   |   |   |        |        |       |  | Hepatocyte    |        |        |       | 21.95 |
| 64109 | A | G | A | G | 0.3051 | 0.101  | 0.064 |  | growth factor | 0.1185 | 2.78E- | 0.065 | 97193 |
|       |   |   |   |   | 62     | 4      | 6     |  | levels        |        | 06     | 1204  | 8     |
| rs191 |   |   |   |   |        |        |       |  | Hepatocyte    |        |        |       | 62.12 |
| 04136 | T | C | T | C | 0.4275 | -0.05  | 0.084 |  | growth factor | 0.5465 | 3.22E- | 0.054 | 93578 |
| 5     |   |   |   |   | 78     |        | 4     |  | levels        |        | 15     | 2459  | 7     |
| rs239 |   |   |   |   |        |        |       |  | Hepatocyte    |        |        |       | 23.61 |
| 5184  | A | G | A | G | 0.1125 | 0.010  | 0.020 |  | growth factor | 0.5977 | 1.17E- | 0.023 | 81794 |
|       |   |   |   |   | 27     | 7      | 4     |  | levels        |        | 06     | 1544  | 5     |
| rs309 |   |   |   |   |        |        |       |  | Hepatocyte    |        |        |       | 23.83 |
| 8843  | G | A | G | A | -0.088 | -0.006 | 0.016 |  | growth factor | 0.689  | 1.05E- | 0.018 | 23.83 |
|       |   |   |   |   | 8568   | 5      | 3     |  | levels        |        | 06     | 1991  | 86422 |
| rs488 |   |   |   |   |        |        |       |  | Hepatocyte    |        |        |       | 37.60 |
| 8362  | C | T | C | T | 0.1883 | 0.055  | 0.025 |  | growth factor | 0.0320 | 8.65E- | 0.030 | 71935 |
|       |   |   |   |   | 76     | 5      | 4     |  | levels        | 398    | 10     | 7178  | 1     |
| rs498 | A | G | A | G | 0.2041 | 0.034  | 0.026 |  | Hepatocyte    | 0.1811 | 5.81E- | 0.028 | 51.90 |

|             |   |   |   |   |           |         |        |                                 |           |          |           |             |
|-------------|---|---|---|---|-----------|---------|--------|---------------------------------|-----------|----------|-----------|-------------|
| 7704        |   |   |   |   | 51        | 8       |        | growth factor levels            |           | 13       | 3357      | 80998       |
| rs62063640  | A | G | A | G | -0.18272  | 0.024   | 0.0322 | Hepatocyte growth factor levels | 0.4464    | 1.48E-06 | 0.0379523 | 23.17906816 |
| rs73767325  | A | G | A | G | 0.0845882 | 0.0104  | 0.0156 | Hepatocyte growth factor levels | 0.510301  | 3.11E-06 | 0.0181378 | 21.74955369 |
| rs7624577   | A | G | A | G | 0.0887149 | 0.0079  | 0.0171 | Hepatocyte growth factor levels | 0.6349    | 1.56E-06 | 0.0184702 | 23.07012451 |
| rs79359283  | T | C | T | C | -0.675281 | -0.1536 | 0.0915 | Hepatocyte growth factor levels | 0.0931108 | 6.06E-08 | 0.124656  | 29.34557927 |
| rs949425    | A | G | A | G | -0.236542 | -0.025  | 0.0341 | Hepatocyte growth factor levels | 0.4511    | 7.51E-09 | 0.0409301 | 33.39880419 |
| rs9636516   | A | G | A | G | -0.091094 | 0.0059  | 0.0157 | Hepatocyte growth factor levels | 0.6947    | 7.83E-07 | 0.0184421 | 24.39825691 |
| rs113606801 | T | C | T | C | -0.339477 | -0.1023 | 0.0821 | Interleukin-9 levels            | 0.2123    | 1.73E-07 | 0.0649534 | 27.31598922 |
| rs115343810 | G | A | G | A | 0.308734  | 0.1065  | 0.1122 | Interleukin-9 levels            | 0.3435    | 4.21E-07 | 0.0610242 | 25.59556555 |





|                     |   |   |   |   |               |             |            |                         |              |              |               |                     |
|---------------------|---|---|---|---|---------------|-------------|------------|-------------------------|--------------|--------------|---------------|---------------------|
| rs737<br>67325      | A | G | A | G | 0.0845<br>882 | -0.010<br>1 | 0.023<br>6 | Interleukin-9<br>levels | 0.6666<br>99 | 3.11E-<br>06 | 0.018<br>1378 | 21.74<br>95536<br>9 |
| rs762<br>4577       | A | G | A | G | 0.0887<br>149 | 0.001<br>2  | 0.026<br>3 | Interleukin-9<br>levels | 0.9699       | 1.56E-<br>06 | 0.018<br>4702 | 23.07<br>01245<br>1 |
| rs793<br>59283      | T | C | T | C | -0.675<br>281 | 0.185<br>3  | 0.140<br>7 | Interleukin-9<br>levels | 0.1977       | 6.06E-<br>08 | 0.124<br>656  | 29.34<br>55792<br>7 |
| rs963<br>6516       | A | G | A | G | -0.091<br>094 | -0.006<br>7 | 0.024<br>3 | Interleukin-9<br>levels | 0.7826<br>99 | 7.83E-<br>07 | 0.018<br>4421 | 24.39<br>82569<br>1 |
| rs113<br>60680<br>1 | T | C | T | C | -0.339<br>477 | 0.004<br>6  | 0.084      | Interleukin-7<br>levels | 0.9355       | 1.73E-<br>07 | 0.064<br>9534 | 27.31<br>59892<br>2 |
| rs115<br>34381<br>0 | G | A | G | A | 0.3087<br>34  | 0.046<br>9  | 0.112<br>8 | Interleukin-7<br>levels | 0.6779<br>01 | 4.21E-<br>07 | 0.061<br>0242 | 25.59<br>55655<br>5 |
| rs116<br>74322<br>8 | C | T | C | T | 0.3318<br>17  | -0.029      | 0.065<br>4 | Interleukin-7<br>levels | 0.6396<br>99 | 3.69E-<br>15 | 0.042<br>1888 | 61.85<br>90035<br>1 |
| rs147<br>83909<br>9 | G | A | G | A | 0.2352<br>19  | 0.081<br>8  | 0.063<br>6 | Interleukin-7<br>levels | 0.2044       | 5.88E-<br>09 | 0.040<br>4137 | 33.87<br>56449<br>2 |
| rs150<br>45080      | T | C | T | C | 0.2568<br>91  | 0.063<br>3  | 0.074      | Interleukin-7<br>levels | 0.4069       | 4.29E-<br>07 | 0.050<br>8128 | 25.55<br>94512      |

9

|                |   |   |   |   |                |             |            |                         |               |              |               |                     |
|----------------|---|---|---|---|----------------|-------------|------------|-------------------------|---------------|--------------|---------------|---------------------|
| rs178<br>64109 | A | G | A | G | 0.3051<br>62   | 0.077       | 0.094<br>6 | Interleukin-7<br>levels | 0.4823        | 2.78E-<br>06 | 0.065<br>1204 | 21.95<br>97193<br>8 |
| rs239<br>5184  | A | G | A | G | 0.1125<br>27   | -0.016<br>2 | 0.031<br>8 | Interleukin-7<br>levels | 0.6229        | 1.17E-<br>06 | 0.023<br>1544 | 23.61<br>81794<br>5 |
| rs309<br>8843  | G | A | G | A | -0.088<br>8568 | -0.010<br>1 | 0.025<br>3 | Interleukin-7<br>levels | 0.6779<br>01  | 1.05E-<br>06 | 0.018<br>1991 | 23.83<br>86422      |
| rs488<br>8362  | C | T | C | T | 0.1883<br>76   | 0.048<br>9  | 0.038<br>4 | Interleukin-7<br>levels | 0.1998        | 8.65E-<br>10 | 0.030<br>7178 | 37.60<br>71935<br>1 |
| rs498<br>7704  | A | G | A | G | 0.2041<br>51   | -0.019<br>7 | 0.040<br>4 | Interleukin-7<br>levels | 0.6239        | 5.81E-<br>13 | 0.028<br>3357 | 51.90<br>80998<br>6 |
| rs620<br>63640 | A | G | A | G | -0.182<br>72   | 0.003<br>3  | 0.049<br>8 | Interleukin-7<br>levels | 0.9503        | 1.48E-<br>06 | 0.037<br>9523 | 23.17<br>90681<br>6 |
| rs737<br>67325 | A | G | A | G | 0.0845<br>882  | -0.042<br>9 | 0.024<br>3 | Interleukin-7<br>levels | 0.0776<br>408 | 3.11E-<br>06 | 0.018<br>1378 | 21.74<br>95536<br>9 |
| rs762<br>4577  | A | G | A | G | 0.0887<br>149  | 0.037<br>9  | 0.027<br>2 | Interleukin-7<br>levels | 0.1712        | 1.56E-<br>06 | 0.018<br>4702 | 23.07<br>01245<br>1 |
| rs793<br>59283 | T | C | T | C | -0.675<br>281  | 0.081<br>8  | 0.145<br>4 | Interleukin-7<br>levels | 0.5748        | 6.06E-<br>08 | 0.124<br>656  | 29.34<br>55792      |



|       |   |   |   |   |        |        |       |               |        |        |       |       |
|-------|---|---|---|---|--------|--------|-------|---------------|--------|--------|-------|-------|
| 5184  |   |   |   |   | 27     | 6      | 8     | levels        | 99     | 06     | 1544  | 81794 |
|       |   |   |   |   |        |        |       |               |        |        |       | 5     |
| rs309 | G | A | G | A | -0.088 | -0.036 | 0.025 | Interleukin-5 | 0.1566 | 1.05E- | 0.018 | 23.83 |
| 8843  |   |   |   |   | 8568   | 2      | 6     | levels        |        | 06     | 1991  | 86422 |
|       |   |   |   |   |        |        |       |               |        |        |       | 37.60 |
| rs488 | C | T | C | T | 0.1883 | 0.086  | 0.039 | Interleukin-5 | 0.0262 | 8.65E- | 0.030 | 71935 |
| 8362  |   |   |   |   | 76     | 8      | 1     | levels        | 198    | 10     | 7178  | 1     |
|       |   |   |   |   |        |        |       |               |        |        |       | 51.90 |
| rs498 | A | G | A | G | 0.2041 | -0.017 | 0.040 | Interleukin-5 | 0.6722 | 5.81E- | 0.028 | 80998 |
| 7704  |   |   |   |   | 51     | 2      | 6     | levels        | 01     | 13     | 3357  | 6     |
|       |   |   |   |   |        |        |       |               |        |        |       | 23.17 |
| rs620 | A | G | A | G | -0.182 | -0.003 | 0.049 | Interleukin-5 | 0.9391 | 1.48E- | 0.037 | 90681 |
| 63640 |   |   |   |   | 72     | 8      | 4     | levels        |        | 06     | 9523  | 6     |
|       |   |   |   |   |        |        |       |               |        |        |       | 21.74 |
| rs737 | A | G | A | G | 0.0845 | -0.020 | 0.024 | Interleukin-5 | 0.4049 | 3.11E- | 0.018 | 95536 |
| 67325 |   |   |   |   | 882    | 4      | 5     | levels        |        | 06     | 1378  | 9     |
|       |   |   |   |   |        |        |       |               |        |        |       | 23.07 |
| rs762 | A | G | A | G | 0.0887 | 0.05   | 0.027 | Interleukin-5 | 0.0641 | 1.56E- | 0.018 | 01245 |
| 4577  |   |   |   |   | 149    |        | 4     | levels        | 106    | 06     | 4702  | 1     |
|       |   |   |   |   |        |        |       |               |        |        |       | 29.34 |
| rs793 | T | C | T | C | -0.675 | 0.064  | 0.152 | Interleukin-5 | 0.6802 | 6.06E- | 0.124 | 55792 |
| 59283 |   |   |   |   | 281    | 1      | 4     | levels        | 99     | 08     | 656   | 7     |
|       |   |   |   |   |        |        |       |               |        |        |       | 24.39 |
| rs963 | A | G | A | G | -0.091 | -0.025 | 0.025 | Interleukin-5 | 0.3019 | 7.83E- | 0.018 | 82569 |
| 6516  |   |   |   |   | 094    | 7      | 1     | levels        |        | 07     | 4421  | 1     |
|       |   |   |   |   |        |        |       |               |        |        |       | 27.31 |
| rs113 | T | C | T | C | -0.339 | -0.089 | 0.056 | Interleukin-4 | 0.1227 | 1.73E- | 0.064 |       |

|       |   |   |   |   |        |        |       |               |        |        |       |       |
|-------|---|---|---|---|--------|--------|-------|---------------|--------|--------|-------|-------|
| 60680 |   |   |   |   | 477    | 7      | 7     | levels        |        | 07     | 9534  | 59892 |
| 1     |   |   |   |   |        |        |       |               |        |        |       | 2     |
| rs115 |   |   |   |   | 0.3087 | 0.096  | 0.075 | Interleukin-4 |        | 4.21E- | 0.061 | 25.59 |
| 34381 | G | A | G | A | 34     | 5      | 9     | levels        | 0.2037 | 07     | 0242  | 55655 |
| 0     |   |   |   |   |        |        |       |               |        |        |       | 5     |
| rs116 |   |   |   |   | 0.3318 | 0.051  | 0.043 | Interleukin-4 |        | 3.69E- | 0.042 | 61.85 |
| 74322 | C | T | C | T | 17     | 6      | 9     | levels        | 0.2528 | 15     | 1888  | 90035 |
| 8     |   |   |   |   |        |        |       |               |        |        |       | 1     |
| rs147 |   |   |   |   | 0.2352 | 0.021  | 0.042 | Interleukin-4 |        | 5.88E- | 0.040 | 33.87 |
| 83909 | G | A | G | A | 19     |        | 3     | levels        | 0.6544 | 09     | 4137  | 56449 |
| 9     |   |   |   |   |        |        |       |               |        |        |       | 2     |
| rs150 |   |   |   |   | 0.2568 | 0.002  | 0.049 | Interleukin-4 |        | 4.29E- | 0.050 | 25.55 |
| 45080 | T | C | T | C | 91     | 5      | 5     | levels        | 0.9848 | 07     | 8128  | 94512 |
| 9     |   |   |   |   |        |        |       |               |        |        |       |       |
| rs178 |   |   |   |   | 0.3051 | 0.114  | 0.065 | Interleukin-4 |        | 2.78E- | 0.065 | 21.95 |
| 64109 | A | G | A | G | 62     | 8      |       | levels        | 0.102  | 06     | 1204  | 97193 |
|       |   |   |   |   |        |        |       |               |        |        |       | 8     |
| rs191 |   |   |   |   | 0.4275 | 0.108  | 0.084 | Interleukin-4 |        | 3.22E- | 0.054 | 62.12 |
| 04136 | T | C | T | C | 78     | 7      | 3     | levels        | 0.1976 | 15     | 2459  | 93578 |
| 5     |   |   |   |   |        |        |       |               |        |        |       | 7     |
| rs239 |   |   |   |   | 0.1125 | 0.060  | 0.020 | Interleukin-4 |        | 1.17E- | 0.023 | 23.61 |
| 5184  | A | G | A | G | 27     | 9      | 6     | levels        | 0.0030 | 7603   | 06    | 1544  |
|       |   |   |   |   |        |        |       |               |        |        |       | 5     |
| rs309 |   |   |   |   | -0.088 | -0.002 | 0.016 | Interleukin-4 |        | 1.05E- | 0.018 | 23.83 |
| 8843  | G | A | G | A | 8568   | 3      | 6     | levels        | 0.889  | 06     | 1991  | 86422 |
|       |   |   |   |   |        |        |       |               |        |        |       |       |
| rs488 |   |   |   |   | 0.1883 | 0.012  | 0.025 | Interleukin-4 |        | 8.65E- | 0.030 | 37.60 |
|       | C | T | C | T |        |        |       |               | 0.6525 |        |       |       |

|       |   |   |   |   |        |        |       |                   |  |        |        |       |       |   |
|-------|---|---|---|---|--------|--------|-------|-------------------|--|--------|--------|-------|-------|---|
| 8362  |   |   |   |   | 76     | 9      | 7     | levels            |  | 01     | 10     | 7178  | 71935 | 1 |
| rs498 | A | G | A | G | 0.2041 | 0.024  | 0.026 | Interleukin-4     |  | 0.3584 | 5.81E- | 0.028 | 51.90 |   |
| 7704  |   |   |   |   | 51     | 1      | 2     | levels            |  |        | 13     | 3357  | 80998 | 6 |
| rs620 | A | G | A | G | -0.182 | 0.007  | 0.032 | Interleukin-4     |  | 0.8081 | 1.48E- | 0.037 | 23.17 |   |
| 63640 |   |   |   |   | 72     | 5      | 6     | levels            |  |        | 06     | 9523  | 90681 | 6 |
| rs737 | A | G | A | G | 0.0845 | 0.006  | 0.015 | Interleukin-4     |  | 0.6627 | 3.11E- | 0.018 | 21.74 |   |
| 67325 |   |   |   |   | 882    | 9      | 8     | levels            |  |        | 06     | 1378  | 95536 | 9 |
| rs762 | A | G | A | G | 0.0887 | 0.035  | 0.017 | Interleukin-4     |  | 0.0444 | 1.56E- | 0.018 | 23.07 |   |
| 4577  |   |   |   |   | 149    |        | 3     | levels            |  |        | 498    | 4702  | 01245 | 1 |
| rs793 | T | C | T | C | -0.675 | 0.051  | 0.093 | Interleukin-4     |  | 0.5858 | 6.06E- | 0.124 | 29.34 |   |
| 59283 |   |   |   |   | 281    | 1      | 2     | levels            |  |        | 08     | 656   | 55792 | 7 |
| rs963 | A | G | A | G | -0.091 | -0.009 | 0.015 | Interleukin-4     |  | 0.5533 | 7.83E- | 0.018 | 24.39 |   |
| 6516  |   |   |   |   | 094    | 5      | 9     | levels            |  |        | 07     | 4421  | 82569 | 1 |
| rs113 | T | C | T | C | -0.339 | 0.063  | 0.080 | Interleukin-2     |  | 0.4315 | 1.73E- | 0.064 | 27.31 |   |
| 60680 |   |   |   |   | 477    | 1      | 9     | receptor          |  |        | 07     | 9534  | 59892 | 2 |
| 1     |   |   |   |   |        |        |       | antagonist levels |  |        |        |       |       |   |
| rs115 | G | A | G | A | 0.3087 | 0.154  | 0.110 | Interleukin-2     |  | 0.1604 | 4.21E- | 0.061 | 25.59 |   |
| 34381 |   |   |   |   | 34     | 7      | 1     | receptor          |  |        | 07     | 0242  | 55655 | 5 |
| 0     |   |   |   |   |        |        |       | antagonist levels |  |        |        |       |       |   |

|       |   |   |   |   |        |        |       |                   |        |        |       |       |
|-------|---|---|---|---|--------|--------|-------|-------------------|--------|--------|-------|-------|
| rs116 |   |   |   |   | 0.3318 | 0.022  | 0.062 | Interleukin-2     | 0.7143 | 3.69E- | 0.042 | 61.85 |
| 74322 | C | T | C | T | 17     | 5      | 3     | receptor          | 01     | 15     | 1888  | 90035 |
| 8     |   |   |   |   |        |        |       | antagonist levels |        |        |       | 1     |
| rs147 |   |   |   |   | 0.2352 | -0.065 | 0.060 | Interleukin-2     | 0.2794 | 5.88E- | 0.040 | 33.87 |
| 83909 | G | A | G | A | 19     | 1      | 1     | receptor          |        | 09     | 4137  | 56449 |
| 9     |   |   |   |   |        |        |       | antagonist levels |        |        |       | 2     |
| rs150 |   |   |   |   | 0.2568 | 0.018  | 0.071 | Interleukin-2     | 0.7782 | 4.29E- | 0.050 | 25.55 |
| 45080 | T | C | T | C | 91     | 9      | 7     | receptor          |        | 07     | 8128  | 94512 |
| 9     |   |   |   |   |        |        |       | antagonist levels |        |        |       |       |
| rs178 |   |   |   |   | 0.3051 | 0.090  | 0.090 | Interleukin-2     | 0.26   | 2.78E- | 0.065 | 21.95 |
| 64109 | A | G | A | G | 62     | 1      | 7     | receptor          |        | 06     | 1204  | 97193 |
|       |   |   |   |   |        |        |       | antagonist levels |        |        |       | 8     |
| rs239 |   |   |   |   | 0.1125 | -0.037 | 0.030 | Interleukin-2     | 0.2274 | 1.17E- | 0.023 | 23.61 |
| 5184  | A | G | A | G | 27     | 1      | 7     | receptor          |        | 06     | 1544  | 81794 |
|       |   |   |   |   |        |        |       | antagonist levels |        |        |       | 5     |
| rs309 |   |   |   |   | -0.088 | -0.026 | 0.024 | Interleukin-2     | 0.2868 | 1.05E- | 0.018 | 23.83 |
| 8843  | G | A | G | A | 8568   | 2      | 5     | receptor          |        | 06     | 1991  | 86422 |
|       |   |   |   |   |        |        |       | antagonist levels |        |        |       |       |
| rs488 |   |   |   |   | 0.1883 | -0.044 | 0.037 | Interleukin-2     | 0.2344 | 8.65E- | 0.030 | 37.60 |
| 8362  | C | T | C | T | 76     | 3      | 3     | receptor          |        | 10     | 7178  | 71935 |
|       |   |   |   |   |        |        |       | antagonist levels |        |        |       | 1     |
| rs498 |   |   |   |   | 0.2041 | -0.021 | 0.038 | Interleukin-2     | 0.5754 | 5.81E- | 0.028 | 51.90 |
| 7704  | A | G | A | G | 51     | 6      | 9     | receptor          |        | 13     | 3357  | 80998 |
|       |   |   |   |   |        |        |       | antagonist levels |        |        |       | 6     |
| rs620 |   |   |   |   | -0.182 | 0.030  | 0.047 | Interleukin-2     | 0.5317 | 1.48E- | 0.037 | 23.17 |
| 63640 | A | G | A | G | 72     | 3      | 7     | receptor          |        | 06     | 9523  | 90681 |



|       |   |   |   |   |        |        |       |  |                   |        |        |       |       |
|-------|---|---|---|---|--------|--------|-------|--|-------------------|--------|--------|-------|-------|
|       |   |   |   |   |        |        |       |  | antagonist levels |        |        |       | 6     |
| rs737 | A | G | A | G | 0.0845 | 0.005  | 0.023 |  | Interleukin-2     |        |        |       | 21.74 |
| 67325 |   |   |   |   | 882    | 4      | 4     |  | receptor          | 0.8194 | 3.11E- | 0.018 | 95536 |
|       |   |   |   |   |        |        |       |  | antagonist levels |        | 06     | 1378  | 9     |
| rs762 | A | G | A | G | 0.0887 | -5.00E | 0.026 |  | Interleukin-2     |        |        |       | 23.07 |
| 4577  |   |   |   |   | 149    | -04    | 1     |  | receptor          | 0.9996 | 1.56E- | 0.018 | 01245 |
|       |   |   |   |   |        |        |       |  | antagonist levels |        | 06     | 4702  | 1     |
| rs793 | T | C | T | C | -0.675 | 0.067  | 0.139 |  | Interleukin-2     |        |        |       | 29.34 |
| 59283 |   |   |   |   | 281    | 9      | 7     |  | receptor          | 0.6398 | 6.06E- | 0.124 | 55792 |
|       |   |   |   |   |        |        |       |  | antagonist levels |        | 08     | 656   | 7     |
| rs949 | A | G | A | G | -0.236 | 0.003  | 0.050 |  | Interleukin-2     |        |        |       | 33.39 |
| 425   |   |   |   |   | 542    | 3      | 1     |  | receptor          | 0.9619 | 7.51E- | 0.040 | 88041 |
|       |   |   |   |   |        |        |       |  | antagonist levels |        | 09     | 9301  | 9     |
| rs963 | A | G | A | G | -0.091 | -0.009 | 0.024 |  | Interleukin-2     |        |        |       | 24.39 |
| 6516  |   |   |   |   | 094    | 1      |       |  | receptor          | 0.7146 | 7.83E- | 0.018 | 82569 |
|       |   |   |   |   |        |        |       |  | antagonist levels |        | 07     | 4421  | 1     |
| rs113 | T | C | T | C | -0.339 | -0.096 | 0.084 |  | Interleukin-2     |        |        |       | 27.31 |
| 60680 |   |   |   |   | 477    | 4      | 3     |  | levels            | 0.2674 | 1.73E- | 0.064 | 59892 |
| 1     |   |   |   |   |        |        |       |  |                   |        | 07     | 9534  | 2     |
| rs115 | G | A | G | A | 0.3087 | 0.072  | 0.114 |  | Interleukin-2     |        |        |       | 25.59 |
| 34381 |   |   |   |   | 34     |        | 9     |  | levels            | 0.5372 | 4.21E- | 0.061 | 55655 |
| 0     |   |   |   |   |        |        |       |  |                   |        | 07     | 0242  | 5     |
| rs116 | C | T | C | T | 0.3318 | 0.053  | 0.063 |  | Interleukin-2     |        |        |       | 61.85 |
| 74322 |   |   |   |   | 17     | 2      | 9     |  | levels            | 0.4175 | 3.69E- | 0.042 | 90035 |
| 8     |   |   |   |   |        |        |       |  |                   |        | 15     | 1888  | 1     |
| rs147 | G | A | G | A | 0.2352 | 0.128  | 0.062 |  | Interleukin-2     |        |        |       | 33.87 |
|       |   |   |   |   |        |        |       |  |                   | 0.0414 | 5.88E- | 0.040 |       |

|             |   |   |   |   |            |         |        |                      |           |          |           |             |        |
|-------------|---|---|---|---|------------|---------|--------|----------------------|-----------|----------|-----------|-------------|--------|
| 839099      |   |   |   |   | 19         | 1       |        | levels               |           | 105      | 09        | 4137        | 564492 |
| rs150450809 | T | C | T | C | 0.256891   | -0.0823 | 0.0741 | Interleukin-2 levels | 0.2268    | 4.29E-07 | 0.0508128 | 25.5594512  |        |
| rs17864109  | A | G | A | G | 0.305162   | 0.1778  | 0.0931 | Interleukin-2 levels | 0.0614894 | 2.78E-06 | 0.0651204 | 21.95971938 |        |
| rs2395184   | A | G | A | G | 0.112527   | -0.0373 | 0.0315 | Interleukin-2 levels | 0.24      | 1.17E-06 | 0.0231544 | 23.61817945 |        |
| rs3098843   | G | A | G | A | -0.0888568 | -0.0035 | 0.0251 | Interleukin-2 levels | 0.8832    | 1.05E-06 | 0.0181991 | 23.8386422  |        |
| rs4888362   | C | T | C | T | 0.188376   | 0.0289  | 0.0383 | Interleukin-2 levels | 0.4525    | 8.65E-10 | 0.0307178 | 37.60719351 |        |
| rs4987704   | A | G | A | G | 0.204151   | -0.0269 | 0.04   | Interleukin-2 levels | 0.5021    | 5.81E-13 | 0.0283357 | 51.90809986 |        |
| rs62063640  | A | G | A | G | -0.18272   | 0.0027  | 0.0488 | Interleukin-2 levels | 0.9655    | 1.48E-06 | 0.0379523 | 23.17906816 |        |
| rs73767325  | A | G | A | G | 0.0845882  | 0.002   | 0.0241 | Interleukin-2 levels | 0.9355    | 3.11E-06 | 0.0181378 | 21.74955369 |        |
| rs762       | A | G | A | G | 0.0887     | 0.022   | 0.026  | Interleukin-2        | 0.4042    | 1.56E-   | 0.018     | 23.07       |        |

|                     |   |   |   |   |               |             |            |                            |               |              |               |                |   |
|---------------------|---|---|---|---|---------------|-------------|------------|----------------------------|---------------|--------------|---------------|----------------|---|
| 4577                |   |   |   |   | 149           | 5           | 9          | levels                     |               | 06           | 4702          | 01245          | 1 |
| rs793<br>59283      | T | C | T | C | -0.675<br>281 | 0.134<br>4  | 0.142<br>7 | Interleukin-2<br>levels    | 0.3808        | 6.06E-<br>08 | 0.124<br>656  | 29.34<br>55792 | 7 |
| rs963<br>6516       | A | G | A | G | -0.091<br>094 | -0.037<br>2 | 0.024<br>7 | Interleukin-2<br>levels    | 0.1291        | 7.83E-<br>07 | 0.018<br>4421 | 24.39<br>82569 | 1 |
| rs113<br>60680<br>1 | T | C | T | C | -0.339<br>477 | -0.020<br>7 | 0.057<br>8 | Interferon gamma<br>levels | 0.7166        | 1.73E-<br>07 | 0.064<br>9534 | 27.31<br>59892 | 2 |
| rs115<br>34381<br>0 | G | A | G | A | 0.3087<br>34  | 0.096<br>3  | 0.078<br>1 | Interferon gamma<br>levels | 0.2125        | 4.21E-<br>07 | 0.061<br>0242 | 25.59<br>55655 | 5 |
| rs116<br>74322<br>8 | C | T | C | T | 0.3318<br>17  | 0.014       | 0.045      | Interferon gamma<br>levels | 0.7491        | 3.69E-<br>15 | 0.042<br>1888 | 61.85<br>90035 | 1 |
| rs147<br>83909<br>9 | G | A | G | A | 0.2352<br>19  | 0.080<br>9  | 0.043<br>3 | Interferon gamma<br>levels | 0.0655<br>104 | 5.88E-<br>09 | 0.040<br>4137 | 33.87<br>56449 | 2 |
| rs150<br>45080<br>9 | T | C | T | C | 0.2568<br>91  | -0.031<br>7 | 0.050<br>8 | Interferon gamma<br>levels | 0.5291        | 4.29E-<br>07 | 0.050<br>8128 | 25.55<br>94512 |   |
| rs178<br>64109      | A | G | A | G | 0.3051<br>62  | 0.044<br>1  | 0.066<br>9 | Interferon gamma<br>levels | 0.5921        | 2.78E-<br>06 | 0.065<br>1204 | 21.95<br>97193 | 8 |

|             |   |   |   |   |            |         |        |                         |          |          |           |             |
|-------------|---|---|---|---|------------|---------|--------|-------------------------|----------|----------|-----------|-------------|
| rs191041365 | T | C | T | C | 0.427578   | 0.0555  | 0.0856 | Interferon gamma levels | 0.5166   | 3.22E-15 | 0.0542459 | 62.12935787 |
| rs2395184   | A | G | A | G | 0.112527   | 0.019   | 0.0211 | Interferon gamma levels | 0.3605   | 1.17E-06 | 0.0231544 | 23.61817945 |
| rs3098843   | G | A | G | A | -0.0888568 | -0.0189 | 0.017  | Interferon gamma levels | 0.267    | 1.05E-06 | 0.0181991 | 23.8386422  |
| rs4888362   | C | T | C | T | 0.188376   | 0.0127  | 0.0264 | Interferon gamma levels | 0.663599 | 8.65E-10 | 0.0307178 | 37.60719351 |
| rs4987704   | A | G | A | G | 0.204151   | -0.0057 | 0.0267 | Interferon gamma levels | 0.8179   | 5.81E-13 | 0.0283357 | 51.90809986 |
| rs62063640  | A | G | A | G | -0.18272   | 0.0189  | 0.0333 | Interferon gamma levels | 0.5736   | 1.48E-06 | 0.0379523 | 23.17906816 |
| rs73767325  | A | G | A | G | 0.0845882  | -0.0088 | 0.0162 | Interferon gamma levels | 0.5916   | 3.11E-06 | 0.0181378 | 21.74955369 |
| rs7624577   | A | G | A | G | 0.0887149  | 0.0146  | 0.0178 | Interferon gamma levels | 0.4353   | 1.56E-06 | 0.0184702 | 23.07012451 |
| rs79359283  | T | C | T | C | -0.675281  | -0.0419 | 0.0953 | Interferon gamma levels | 0.676401 | 6.06E-08 | 0.124656  | 29.34557927 |

|                     |   |   |   |   |                |             |            |                                             |               |              |               |                     |
|---------------------|---|---|---|---|----------------|-------------|------------|---------------------------------------------|---------------|--------------|---------------|---------------------|
| rs963<br>6516       | A | G | A | G | -0.091<br>094  | -0.014<br>2 | 0.016<br>4 | Interferon gamma<br>levels                  | 0.3814        | 7.83E-<br>07 | 0.018<br>4421 | 24.39<br>82569<br>1 |
| rs113<br>60680<br>1 | T | C | T | C | -0.339<br>477  | -0.074<br>6 | 0.083      | Growth-regulated<br>protein alpha<br>levels | 0.3553        | 1.73E-<br>07 | 0.064<br>9534 | 27.31<br>59892<br>2 |
| rs115<br>34381<br>0 | G | A | G | A | 0.3087<br>34   | 0.087<br>6  | 0.117<br>2 | Growth-regulated<br>protein alpha<br>levels | 0.4553        | 4.21E-<br>07 | 0.061<br>0242 | 25.59<br>55655<br>5 |
| rs116<br>74322<br>8 | C | T | C | T | 0.3318<br>17   | 0.073<br>6  | 0.063<br>2 | Growth-regulated<br>protein alpha<br>levels | 0.2356        | 3.69E-<br>15 | 0.042<br>1888 | 61.85<br>90035<br>1 |
| rs147<br>83909<br>9 | G | A | G | A | 0.2352<br>19   | 0.008<br>5  | 0.062<br>9 | Growth-regulated<br>protein alpha<br>levels | 0.8863        | 5.88E-<br>09 | 0.040<br>4137 | 33.87<br>56449<br>2 |
| rs150<br>45080<br>9 | T | C | T | C | 0.2568<br>91   | -0.112      | 0.073<br>1 | Growth-regulated<br>protein alpha<br>levels | 0.1208        | 4.29E-<br>07 | 0.050<br>8128 | 25.55<br>94512      |
| rs178<br>64109      | A | G | A | G | 0.3051<br>62   | 0.149<br>2  | 0.091<br>8 | Growth-regulated<br>protein alpha<br>levels | 0.0893<br>902 | 2.78E-<br>06 | 0.065<br>1204 | 21.95<br>97193<br>8 |
| rs239<br>5184       | A | G | A | G | 0.1125<br>27   | -0.057<br>1 | 0.031<br>2 | Growth-regulated<br>protein alpha<br>levels | 0.0672<br>404 | 1.17E-<br>06 | 0.023<br>1544 | 23.61<br>81794<br>5 |
| rs309<br>8843       | G | A | G | A | -0.088<br>8568 | -0.013<br>9 | 0.025      | Growth-regulated<br>protein alpha           | 0.5775        | 1.05E-<br>06 | 0.018<br>1991 | 23.83<br>86422      |

|       |   |   |   |   |        |        |       |                                       |        |          |       |       |
|-------|---|---|---|---|--------|--------|-------|---------------------------------------|--------|----------|-------|-------|
| rs488 | C | T | C | T | 0.1883 | 0.022  | 0.038 | levels                                |        |          |       |       |
| 8362  |   |   |   |   | 76     | 6      | 1     | Growth-regulated protein alpha levels | 0.5517 | 8.65E-10 | 0.030 | 37.60 |
|       |   |   |   |   |        |        |       |                                       |        | 7178     |       | 71935 |
|       |   |   |   |   |        |        |       |                                       |        |          |       | 1     |
| rs498 | A | G | A | G | 0.2041 | -0.033 | 0.039 | Growth-regulated protein alpha levels |        |          |       |       |
| 7704  |   |   |   |   | 51     | 3      | 9     |                                       | 0.4067 | 5.81E-13 | 0.028 | 51.90 |
|       |   |   |   |   |        |        |       |                                       |        | 3357     |       | 80998 |
|       |   |   |   |   |        |        |       |                                       |        |          |       | 6     |
| rs620 | A | G | A | G | -0.182 | -0.034 | 0.048 | Growth-regulated protein alpha levels |        |          |       |       |
| 63640 |   |   |   |   | 72     |        | 9     |                                       | 0.494  | 1.48E-06 | 0.037 | 23.17 |
|       |   |   |   |   |        |        |       |                                       |        | 9523     |       | 90681 |
|       |   |   |   |   |        |        |       |                                       |        |          |       | 6     |
| rs737 | A | G | A | G | 0.0845 | 0.011  | 0.023 | Growth-regulated protein alpha levels |        |          |       |       |
| 67325 |   |   |   |   | 882    | 6      | 9     |                                       | 0.6325 | 3.11E-06 | 0.018 | 21.74 |
|       |   |   |   |   |        |        |       |                                       | 01     | 1378     |       | 95536 |
|       |   |   |   |   |        |        |       |                                       |        |          |       | 9     |
| rs762 | A | G | A | G | 0.0887 | -0.015 | 0.026 | Growth-regulated protein alpha levels |        |          |       |       |
| 4577  |   |   |   |   | 149    | 6      | 8     |                                       | 0.5605 | 1.56E-06 | 0.018 | 23.07 |
|       |   |   |   |   |        |        |       |                                       |        | 4702     |       | 01245 |
|       |   |   |   |   |        |        |       |                                       |        |          |       | 1     |
| rs793 | T | C | T | C | -0.675 | -0.081 | 0.142 | Growth-regulated protein alpha levels |        |          |       |       |
| 59283 |   |   |   |   | 281    | 9      | 9     |                                       | 0.5723 | 6.06E-08 | 0.124 | 29.34 |
|       |   |   |   |   |        |        |       |                                       |        | 656      |       | 55792 |
|       |   |   |   |   |        |        |       |                                       |        |          |       | 7     |
| rs949 | A | G | A | G | -0.236 | 0.030  | 0.050 | Growth-regulated protein alpha levels |        |          |       |       |
| 425   |   |   |   |   | 542    | 4      | 8     |                                       | 0.5465 | 7.51E-09 | 0.040 | 33.39 |
|       |   |   |   |   |        |        |       |                                       |        | 9301     |       | 88041 |
|       |   |   |   |   |        |        |       |                                       |        |          |       | 9     |
| rs963 | A | G | A | G | -0.091 | -0.025 | 0.024 | Growth-regulated protein alpha levels |        |          |       |       |
| 6516  |   |   |   |   | 094    | 4      | 7     |                                       | 0.3039 | 7.83E-07 | 0.018 | 24.39 |
|       |   |   |   |   |        |        |       |                                       |        | 4421     |       | 82569 |
|       |   |   |   |   |        |        |       |                                       |        |          |       | 1     |
| rs113 | T | C | T | C | -0.339 | -0.008 | 0.057 | Granulocyte-colon                     | 0.8799 | 1.73E-   | 0.064 | 27.31 |

|       |   |   |   |   |        |        |       |                   |        |        |       |       |
|-------|---|---|---|---|--------|--------|-------|-------------------|--------|--------|-------|-------|
| 60680 |   |   |   |   | 477    | 6      | 2     | y stimulating     |        | 07     | 9534  | 59892 |
| 1     |   |   |   |   |        |        |       | factor levels     |        |        |       | 2     |
| rs115 |   |   |   |   | 0.3087 | 0.144  | 0.076 | Granulocyte-colon | 0.0566 | 4.21E- | 0.061 | 25.59 |
| 34381 | G | A | G | A | 34     | 3      | 4     | y stimulating     | 996    | 07     | 0242  | 55655 |
| 0     |   |   |   |   |        |        |       | factor levels     |        |        |       | 5     |
| rs116 |   |   |   |   | 0.3318 | 0.039  | 0.044 | Granulocyte-colon |        | 3.69E- | 0.042 | 61.85 |
| 74322 | C | T | C | T | 17     | 4      | 7     | y stimulating     | 0.3734 | 15     | 1888  | 90035 |
| 8     |   |   |   |   |        |        |       | factor levels     |        |        |       | 1     |
| rs147 |   |   |   |   | 0.2352 | 0.081  | 0.042 | Granulocyte-colon | 0.0546 | 5.88E- | 0.040 | 33.87 |
| 83909 | G | A | G | A | 19     | 9      | 1     | y stimulating     | 903    | 09     | 4137  | 56449 |
| 9     |   |   |   |   |        |        |       | factor levels     |        |        |       | 2     |
| rs150 |   |   |   |   | 0.2568 | 0.035  | 0.049 | Granulocyte-colon |        | 4.29E- | 0.050 | 25.55 |
| 45080 | T | C | T | C | 91     | 5      | 9     | y stimulating     | 0.4876 | 07     | 8128  | 94512 |
| 9     |   |   |   |   |        |        |       | factor levels     |        |        |       |       |
| rs178 |   |   |   |   | 0.3051 | 0.085  | 0.065 | Granulocyte-colon |        | 2.78E- | 0.065 | 21.95 |
| 64109 | A | G | A | G | 62     |        | 8     | y stimulating     | 0.2195 | 06     | 1204  | 97193 |
|       |   |   |   |   |        |        |       | factor levels     |        |        |       | 8     |
| rs239 |   |   |   |   | 0.1125 | 0.031  | 0.020 | Granulocyte-colon |        | 1.17E- | 0.023 | 23.61 |
| 5184  | A | G | A | G | 27     |        | 9     | y stimulating     | 0.1346 | 06     | 1544  | 81794 |
|       |   |   |   |   |        |        |       | factor levels     |        |        |       | 5     |
| rs309 |   |   |   |   | -0.088 | -0.019 | 0.016 | Granulocyte-colon |        | 1.05E- | 0.018 | 23.83 |
| 8843  | G | A | G | A | 8568   | 5      | 7     | y stimulating     | 0.2463 | 06     | 1991  | 86422 |
|       |   |   |   |   |        |        |       | factor levels     |        |        |       |       |
| rs488 |   |   |   |   | 0.1883 | 0.006  | 0.025 | Granulocyte-colon |        | 8.65E- | 0.030 | 37.60 |
| 8362  | C | T | C | T | 76     | 5      | 9     | y stimulating     | 0.8017 | 10     | 7178  | 71935 |
|       |   |   |   |   |        |        |       | factor levels     |        |        |       | 1     |

|                     |   |   |   |   |               |              |            |                                                     |                |              |               |                     |
|---------------------|---|---|---|---|---------------|--------------|------------|-----------------------------------------------------|----------------|--------------|---------------|---------------------|
| rs498<br>7704       | A | G | A | G | 0.2041<br>51  | -0.010<br>4  | 0.026<br>4 | Granulocyte-colon<br>y stimulating<br>factor levels | 0.6903         | 5.81E-<br>13 | 0.028<br>3357 | 51.90<br>80998<br>6 |
| rs620<br>63640      | A | G | A | G | -0.182<br>72  | 0.05         | 0.032<br>7 | Granulocyte-colon<br>y stimulating<br>factor levels | 0.125          | 1.48E-<br>06 | 0.037<br>9523 | 23.17<br>90681<br>6 |
| rs737<br>67325      | A | G | A | G | 0.0845<br>882 | 1.00E-<br>04 | 0.016      | Granulocyte-colon<br>y stimulating<br>factor levels | 0.9993         | 3.11E-<br>06 | 0.018<br>1378 | 21.74<br>95536<br>9 |
| rs762<br>4577       | A | G | A | G | 0.0887<br>149 | 0.048<br>1   | 0.017<br>5 | Granulocyte-colon<br>y stimulating<br>factor levels | 0.0065<br>2905 | 1.56E-<br>06 | 0.018<br>4702 | 23.07<br>01245<br>1 |
| rs793<br>59283      | T | C | T | C | -0.675<br>281 | 0.220<br>8   | 0.092<br>9 | Granulocyte-colon<br>y stimulating<br>factor levels | 0.0192<br>101  | 6.06E-<br>08 | 0.124<br>656  | 29.34<br>55792<br>7 |
| rs963<br>6516       | A | G | A | G | -0.091<br>094 | 0.007<br>3   | 0.016<br>1 | Granulocyte-colon<br>y stimulating<br>factor levels | 0.6473<br>01   | 7.83E-<br>07 | 0.018<br>4421 | 24.39<br>82569<br>1 |
| rs113<br>60680<br>1 | T | C | T | C | -0.339<br>477 | -0.104       | 0.056<br>8 | Fibroblast growth<br>factor basic levels            | 0.0677<br>704  | 1.73E-<br>07 | 0.064<br>9534 | 27.31<br>59892<br>2 |
| rs115<br>34381<br>0 | G | A | G | A | 0.3087<br>34  | -0.005<br>2  | 0.077<br>1 | Fibroblast growth<br>factor basic levels            | 0.92           | 4.21E-<br>07 | 0.061<br>0242 | 25.59<br>55655<br>5 |
| rs116<br>74322      | C | T | C | T | 0.3318<br>17  | -0.031<br>3  | 0.045<br>2 | Fibroblast growth<br>factor basic levels            | 0.5023         | 3.69E-<br>15 | 0.042<br>1888 | 61.85<br>90035      |



|       |   |   |   |   |        |        |       |                     |        |        |       |       |       |
|-------|---|---|---|---|--------|--------|-------|---------------------|--------|--------|-------|-------|-------|
| 8     |   |   |   |   |        |        |       |                     |        |        |       |       | 1     |
| rs147 |   |   |   |   |        |        |       |                     |        |        |       |       | 33.87 |
| 83909 | G | A | G | A | 0.2352 | 0.053  | 0.042 | Fibroblast growth   | 0.2277 | 5.88E- | 0.040 | 56449 | 2     |
| 9     |   |   |   |   | 19     |        | 8     | factor basic levels |        | 09     | 4137  |       |       |
| rs150 |   |   |   |   |        |        |       |                     |        |        |       |       | 25.55 |
| 45080 | T | C | T | C | 0.2568 | -0.044 | 0.050 | Fibroblast growth   | 0.3597 | 4.29E- | 0.050 | 94512 |       |
| 9     |   |   |   |   | 91     | 1      | 5     | factor basic levels |        | 07     | 8128  |       |       |
| rs178 |   |   |   |   |        |        |       |                     |        |        |       |       | 21.95 |
| 64109 | A | G | A | G | 0.3051 | 0.108  | 0.068 | Fibroblast growth   | 0.1357 | 2.78E- | 0.065 | 97193 | 8     |
|       |   |   |   |   | 62     | 3      | 2     | factor basic levels |        | 06     | 1204  |       |       |
| rs239 |   |   |   |   |        |        |       |                     |        |        |       |       | 23.61 |
| 5184  | A | G | A | G | 0.1125 | 0.012  | 0.021 | Fibroblast growth   | 0.564  | 1.17E- | 0.023 | 81794 | 5     |
|       |   |   |   |   | 27     | 2      | 3     | factor basic levels |        | 06     | 1544  |       |       |
| rs309 |   |   |   |   |        |        |       |                     |        |        |       |       | 23.83 |
| 8843  | G | A | G | A | -0.088 | -0.013 | 0.017 | Fibroblast growth   | 0.4182 | 1.05E- | 0.018 | 86422 |       |
|       |   |   |   |   | 8568   | 9      | 1     | factor basic levels |        | 06     | 1991  |       |       |
| rs488 |   |   |   |   |        |        |       |                     |        |        |       |       | 37.60 |
| 8362  | C | T | C | T | 0.1883 | 0.017  | 0.026 | Fibroblast growth   | 0.5445 | 8.65E- | 0.030 | 71935 | 1     |
|       |   |   |   |   | 76     |        | 5     | factor basic levels |        | 10     | 7178  |       |       |
| rs498 |   |   |   |   |        |        |       |                     |        |        |       |       | 51.90 |
| 7704  | A | G | A | G | 0.2041 | 0.038  | 0.026 | Fibroblast growth   | 0.1542 | 5.81E- | 0.028 | 80998 | 6     |
|       |   |   |   |   | 51     | 4      | 8     | factor basic levels |        | 13     | 3357  |       |       |
| rs620 |   |   |   |   |        |        |       |                     |        |        |       |       | 23.17 |
| 63640 | A | G | A | G | -0.182 | 0.032  | 0.033 | Fibroblast growth   | 0.3328 | 1.48E- | 0.037 | 90681 | 6     |
|       |   |   |   |   | 72     | 6      | 5     | factor basic levels |        | 06     | 9523  |       |       |
| rs737 |   |   |   |   |        |        |       |                     |        |        |       |       | 21.74 |
| 67325 | A | G | A | G | 0.0845 | -0.003 | 0.016 | Fibroblast growth   | 0.8451 | 3.11E- | 0.018 | 95536 |       |
|       |   |   |   |   | 882    | 1      | 3     | factor basic levels |        | 06     | 1378  |       |       |



|             |   |   |   |   |            |         |        |                |          |          |           |             |
|-------------|---|---|---|---|------------|---------|--------|----------------|----------|----------|-----------|-------------|
| 450809      |   |   |   |   | 91         | 8       | 4      |                |          | 07       | 8128      | 94512       |
| rs17864109  | A | G | A | G | 0.305162   | 0.0123  | 0.0647 | Eotaxin levels | 0.8872   | 2.78E-06 | 0.0651204 | 21.95971938 |
| rs191041365 | T | C | T | C | 0.427578   | -0.0377 | 0.0843 | Eotaxin levels | 0.658901 | 3.22E-15 | 0.0542459 | 62.12935787 |
| rs2395184   | A | G | A | G | 0.112527   | 0.0144  | 0.0205 | Eotaxin levels | 0.4783   | 1.17E-06 | 0.0231544 | 23.61817945 |
| rs3098843   | G | A | G | A | -0.0888568 | 0.0106  | 0.0165 | Eotaxin levels | 0.513499 | 1.05E-06 | 0.0181991 | 23.8386422  |
| rs4888362   | C | T | C | T | 0.188376   | 0.016   | 0.0256 | Eotaxin levels | 0.5608   | 8.65E-10 | 0.0307178 | 37.60719351 |
| rs4987704   | A | G | A | G | 0.204151   | 0.0024  | 0.0262 | Eotaxin levels | 0.9267   | 5.81E-13 | 0.0283357 | 51.90809986 |
| rs62063640  | A | G | A | G | -0.18272   | -0.0343 | 0.0323 | Eotaxin levels | 0.282    | 1.48E-06 | 0.0379523 | 23.17906816 |
| rs73767325  | A | G | A | G | 0.0845882  | 0.0117  | 0.0158 | Eotaxin levels | 0.4612   | 3.11E-06 | 0.0181378 | 21.74955369 |
| rs762       | A | G | A | G | 0.0887     | -0.002  | 0.017  | Eotaxin levels | 0.8693   | 1.56E-   | 0.018     | 23.07       |

|                |   |   |   |   |               |            |            |                |        |              |               |                     |
|----------------|---|---|---|---|---------------|------------|------------|----------------|--------|--------------|---------------|---------------------|
| 4577           |   |   |   |   | 149           | 6          | 3          |                |        | 06           | 4702          | 01245               |
| rs793<br>59283 | T | C | T | C | -0.675<br>281 | 0.136<br>3 | 0.091<br>8 | Eotaxin levels | 0.1394 | 6.06E-<br>08 | 0.124<br>656  | 29.34<br>55792<br>7 |
| rs949<br>425   | A | G | A | G | -0.236<br>542 | 0.055<br>2 | 0.034<br>3 | Eotaxin levels | 0.1156 | 7.51E-<br>09 | 0.040<br>9301 | 33.39<br>88041<br>9 |
| rs963<br>6516  | A | G | A | G | -0.091<br>094 | -0.004     | 0.015<br>9 | Eotaxin levels | 0.7887 | 7.83E-<br>07 | 0.018<br>4421 | 24.39<br>82569<br>1 |

#### AAP\_Cytokine

| SNP                | effect_allele.exposure | other_allele.exposure | effect_allele.outcome | other_allele.outcome | beta.exposure | beta.outcome | se.outcome | pval.outcome | outcome.deprecated | pval.exposure | se.exposure | F      |
|--------------------|------------------------|-----------------------|-----------------------|----------------------|---------------|--------------|------------|--------------|--------------------|---------------|-------------|--------|
| rs100<br>3543<br>2 | A                      | G                     | A                     | G                    | 0.192         | 0.046        | 0.035      | 0.187        | CTACK levels       | 0.000         | 0.035       | 30.568 |
| rs107<br>5549<br>0 | G                      | A                     | G                     | A                    | 0.113         | 0.028        | 0.024      | 0.246        | CTACK levels       | 0.000         | 0.025       | 20.983 |
| rs108<br>4750<br>6 | T                      | C                     | T                     | C                    | 0.143         | -0.001       | 0.030      | 0.980        | CTACK levels       | 0.000         | 0.031       | 20.856 |

---

|                     |   |   |   |   |        |        |       |       |              |       |       |        |
|---------------------|---|---|---|---|--------|--------|-------|-------|--------------|-------|-------|--------|
| rs114<br>4348<br>04 | G | T | G | T | 0.320  | 0.016  | 0.070 | 0.800 | CTACK levels | 0.000 | 0.070 | 21.218 |
| rs115<br>3438<br>10 | G | A | G | A | 0.509  | 0.088  | 0.114 | 0.445 | CTACK levels | 0.000 | 0.077 | 43.169 |
| rs115<br>4284<br>18 | T | C | T | C | -0.341 | -0.003 | 0.069 | 0.972 | CTACK levels | 0.000 | 0.066 | 27.047 |
| rs116<br>1808<br>34 | A | G | A | G | 0.430  | 0.005  | 0.101 | 0.957 | CTACK levels | 0.000 | 0.081 | 28.240 |
| rs116<br>7432<br>28 | C | T | C | T | 0.472  | 0.119  | 0.063 | 0.059 | CTACK levels | 0.000 | 0.055 | 74.686 |
| rs125<br>3240<br>8  | A | G | A | G | 0.245  | -0.013 | 0.052 | 0.818 | CTACK levels | 0.000 | 0.049 | 24.910 |
| rs147<br>8390<br>99 | G | A | G | A | 0.327  | -0.066 | 0.062 | 0.286 | CTACK levels | 0.000 | 0.053 | 37.633 |
| rs180<br>8413<br>91 | T | G | T | G | 0.363  | 0.006  | 0.076 | 0.895 | CTACK levels | 0.000 | 0.076 | 22.971 |
| rs209<br>9700       | A | G | A | G | 0.180  | 0.045  | 0.041 | 0.273 | CTACK levels | 0.000 | 0.039 | 21.283 |

---

|                    |   |   |   |   |        |        |       |       |                                    |       |       |        |
|--------------------|---|---|---|---|--------|--------|-------|-------|------------------------------------|-------|-------|--------|
| rs472<br>6575      | G | T | G | T | 0.167  | 0.039  | 0.025 | 0.109 | CTACK levels                       | 0.000 | 0.026 | 42.174 |
| rs645<br>3912      | T | C | T | C | 0.123  | -0.052 | 0.026 | 0.046 | CTACK levels                       | 0.000 | 0.025 | 24.178 |
| rs650<br>1457      | T | C | T | C | -0.126 | 0.002  | 0.027 | 0.936 | CTACK levels                       | 0.000 | 0.027 | 21.665 |
| rs657<br>6081      | C | T | C | T | 0.130  | -0.043 | 0.026 | 0.097 | CTACK levels                       | 0.000 | 0.026 | 25.409 |
| rs728<br>1583<br>0 | A | G | A | G | 0.293  | 0.171  | 0.077 | 0.029 | CTACK levels                       | 0.000 | 0.060 | 23.542 |
| rs927<br>1367      | A | G | A | G | 0.126  | 0.027  | 0.024 | 0.258 | CTACK levels                       | 0.000 | 0.025 | 25.069 |
| rs963<br>5812      | A | G | A | G | -0.133 | 0.027  | 0.026 | 0.297 | CTACK levels                       | 0.000 | 0.028 | 22.732 |
| rs984<br>2794      | T | G | T | G | 0.116  | 0.014  | 0.024 | 0.549 | CTACK levels                       | 0.000 | 0.025 | 21.947 |
| rs100<br>3543<br>2 | A | G | A | G | 0.192  | 0.018  | 0.035 | 0.611 | beta-nerve growth<br>factor levels | 0.000 | 0.035 | 30.568 |
| rs107<br>5549<br>0 | G | A | G | A | 0.113  | 0.021  | 0.025 | 0.410 | beta-nerve growth<br>factor levels | 0.000 | 0.025 | 20.983 |
| rs108<br>4750<br>6 | T | C | T | C | 0.143  | -0.010 | 0.030 | 0.745 | beta-nerve growth<br>factor levels | 0.000 | 0.031 | 20.856 |

|                     |   |   |   |   |        |        |       |       |                                    |       |       |        |
|---------------------|---|---|---|---|--------|--------|-------|-------|------------------------------------|-------|-------|--------|
| rs114<br>4348<br>04 | G | T | G | T | 0.320  | -0.015 | 0.070 | 0.824 | beta-nerve growth<br>factor levels | 0.000 | 0.070 | 21.218 |
| rs115<br>3438<br>10 | G | A | G | A | 0.509  | 0.059  | 0.116 | 0.604 | beta-nerve growth<br>factor levels | 0.000 | 0.077 | 43.169 |
| rs115<br>4284<br>18 | T | C | T | C | -0.341 | 0.049  | 0.070 | 0.449 | beta-nerve growth<br>factor levels | 0.000 | 0.066 | 27.047 |
| rs116<br>1808<br>34 | A | G | A | G | 0.430  | 0.022  | 0.099 | 0.828 | beta-nerve growth<br>factor levels | 0.000 | 0.081 | 28.240 |
| rs116<br>7432<br>28 | C | T | C | T | 0.472  | 0.083  | 0.064 | 0.187 | beta-nerve growth<br>factor levels | 0.000 | 0.055 | 74.686 |
| rs125<br>3240<br>8  | A | G | A | G | 0.245  | -0.048 | 0.053 | 0.381 | beta-nerve growth<br>factor levels | 0.000 | 0.049 | 24.910 |
| rs147<br>8390<br>99 | G | A | G | A | 0.327  | 0.013  | 0.063 | 0.835 | beta-nerve growth<br>factor levels | 0.000 | 0.053 | 37.633 |
| rs180<br>8413<br>91 | T | G | T | G | 0.363  | 0.064  | 0.076 | 0.415 | beta-nerve growth<br>factor levels | 0.000 | 0.076 | 22.971 |
| rs209<br>9700       | A | G | A | G | 0.180  | -0.026 | 0.041 | 0.516 | beta-nerve growth<br>factor levels | 0.000 | 0.039 | 21.283 |

|                    |   |   |   |   |        |        |       |       |                                                 |       |       |        |
|--------------------|---|---|---|---|--------|--------|-------|-------|-------------------------------------------------|-------|-------|--------|
| rs472<br>6575      | G | T | G | T | 0.167  | 0.038  | 0.025 | 0.123 | beta-nerve growth<br>factor levels              | 0.000 | 0.026 | 42.174 |
| rs645<br>3912      | T | C | T | C | 0.123  | 0.000  | 0.026 | 0.993 | beta-nerve growth<br>factor levels              | 0.000 | 0.025 | 24.178 |
| rs650<br>1457      | T | C | T | C | -0.126 | -0.019 | 0.028 | 0.486 | beta-nerve growth<br>factor levels              | 0.000 | 0.027 | 21.665 |
| rs657<br>6081      | C | T | C | T | 0.130  | 0.011  | 0.026 | 0.676 | beta-nerve growth<br>factor levels              | 0.000 | 0.026 | 25.409 |
| rs728<br>1583<br>0 | A | G | A | G | 0.293  | 0.063  | 0.078 | 0.395 | beta-nerve growth<br>factor levels              | 0.000 | 0.060 | 23.542 |
| rs927<br>1367      | A | G | A | G | 0.126  | -0.006 | 0.024 | 0.798 | beta-nerve growth<br>factor levels              | 0.000 | 0.025 | 25.069 |
| rs963<br>5812      | A | G | A | G | -0.133 | -0.012 | 0.027 | 0.651 | beta-nerve growth<br>factor levels              | 0.000 | 0.028 | 22.732 |
| rs984<br>2794      | T | G | T | G | 0.116  | 0.015  | 0.024 | 0.516 | beta-nerve growth<br>factor levels              | 0.000 | 0.025 | 21.947 |
| rs100<br>3543<br>2 | A | G | A | G | 0.192  | 0.028  | 0.026 | 0.308 | Vascular<br>endothelial growth<br>factor levels | 0.000 | 0.035 | 30.568 |
| rs107<br>5549<br>0 | G | A | G | A | 0.113  | 0.018  | 0.017 | 0.299 | Vascular<br>endothelial growth<br>factor levels | 0.000 | 0.025 | 20.983 |
| rs108<br>4750<br>6 | T | C | T | C | 0.143  | -0.019 | 0.021 | 0.374 | Vascular<br>endothelial growth<br>factor levels | 0.000 | 0.031 | 20.856 |



|       |   |   |   |   |        |        |       |       |                    |          |       |        |  |
|-------|---|---|---|---|--------|--------|-------|-------|--------------------|----------|-------|--------|--|
| rs114 |   |   |   |   |        |        |       |       |                    | Vascular |       |        |  |
| 4348  | G | T | G | T | 0.320  | 0.042  | 0.049 | 0.386 | endothelial growth | 0.000    | 0.070 | 21.218 |  |
| 04    |   |   |   |   |        |        |       |       | factor levels      |          |       |        |  |
| rs115 |   |   |   |   |        |        |       |       | Vascular           |          |       |        |  |
| 3438  | G | A | G | A | 0.509  | 0.094  | 0.080 | 0.243 | endothelial growth | 0.000    | 0.077 | 43.169 |  |
| 10    |   |   |   |   |        |        |       |       | factor levels      |          |       |        |  |
| rs115 |   |   |   |   |        |        |       |       | Vascular           |          |       |        |  |
| 4284  | T | C | T | C | -0.341 | 0.028  | 0.049 | 0.598 | endothelial growth | 0.000    | 0.066 | 27.047 |  |
| 18    |   |   |   |   |        |        |       |       | factor levels      |          |       |        |  |
| rs116 |   |   |   |   |        |        |       |       | Vascular           |          |       |        |  |
| 1808  | A | G | A | G | 0.430  | -0.019 | 0.070 | 0.783 | endothelial growth | 0.000    | 0.081 | 28.240 |  |
| 34    |   |   |   |   |        |        |       |       | factor levels      |          |       |        |  |
| rs116 |   |   |   |   |        |        |       |       | Vascular           |          |       |        |  |
| 7432  | C | T | C | T | 0.472  | -0.006 | 0.047 | 0.931 | endothelial growth | 0.000    | 0.055 | 74.686 |  |
| 28    |   |   |   |   |        |        |       |       | factor levels      |          |       |        |  |
| rs125 |   |   |   |   |        |        |       |       | Vascular           |          |       |        |  |
| 3240  | A | G | A | G | 0.245  | 0.070  | 0.037 | 0.058 | endothelial growth | 0.000    | 0.049 | 24.910 |  |
| 8     |   |   |   |   |        |        |       |       | factor levels      |          |       |        |  |
| rs147 |   |   |   |   |        |        |       |       | Vascular           |          |       |        |  |
| 8390  | G | A | G | A | 0.327  | 0.104  | 0.044 | 0.020 | endothelial growth | 0.000    | 0.053 | 37.633 |  |
| 99    |   |   |   |   |        |        |       |       | factor levels      |          |       |        |  |
| rs180 |   |   |   |   |        |        |       |       | Vascular           |          |       |        |  |
| 8413  | T | G | T | G | 0.363  | -0.036 | 0.054 | 0.502 | endothelial growth | 0.000    | 0.076 | 22.971 |  |
| 91    |   |   |   |   |        |        |       |       | factor levels      |          |       |        |  |
| rs209 |   |   |   |   |        |        |       |       | Vascular           |          |       |        |  |
| 9700  | A | G | A | G | 0.180  | 0.025  | 0.029 | 0.398 | endothelial growth | 0.000    | 0.039 | 21.283 |  |

|       |   |   |   |   |        |        |       |       |                    |       |       |        |
|-------|---|---|---|---|--------|--------|-------|-------|--------------------|-------|-------|--------|
| rs472 | G | T | G | T | 0.167  | -0.002 | 0.017 | 0.937 | factor levels      | 0.000 | 0.026 | 42.174 |
| 6575  |   |   |   |   |        |        |       |       | Vascular           |       |       |        |
| rs645 | T | C | T | C | 0.123  | -0.040 | 0.018 | 0.029 | endothelial growth | 0.000 | 0.025 | 24.178 |
| 3912  |   |   |   |   |        |        |       |       | factor levels      |       |       |        |
| rs650 | T | C | T | C | -0.126 | 0.013  | 0.020 | 0.508 | Vascular           | 0.000 | 0.027 | 21.665 |
| 1457  |   |   |   |   |        |        |       |       | endothelial growth |       |       |        |
| rs657 | C | T | C | T | 0.130  | 0.034  | 0.019 | 0.063 | factor levels      | 0.000 | 0.026 | 25.409 |
| 6081  |   |   |   |   |        |        |       |       | Vascular           |       |       |        |
| rs728 | A | G | A | G | 0.293  | 0.048  | 0.053 | 0.297 | endothelial growth | 0.000 | 0.060 | 23.542 |
| 1583  |   |   |   |   |        |        |       |       | factor levels      |       |       |        |
| 0     |   |   |   |   |        |        |       |       | Vascular           |       |       |        |
| rs927 | A | G | A | G | 0.126  | -0.001 | 0.017 | 0.968 | endothelial growth | 0.000 | 0.025 | 25.069 |
| 1367  |   |   |   |   |        |        |       |       | factor levels      |       |       |        |
| rs963 | A | G | A | G | -0.133 | 0.003  | 0.019 | 0.860 | Vascular           | 0.000 | 0.028 | 22.732 |
| 5812  |   |   |   |   |        |        |       |       | endothelial growth |       |       |        |
| rs984 | T | G | T | G | 0.116  | 0.017  | 0.017 | 0.308 | factor levels      | 0.000 | 0.025 | 21.947 |
| 2794  |   |   |   |   |        |        |       |       | Vascular           |       |       |        |
| rs100 | A | G | A | G | 0.192  | 0.017  | 0.036 | 0.638 | endothelial growth | 0.000 | 0.035 | 30.568 |
|       |   |   |   |   |        |        |       |       | Macrophage         |       |       |        |

|       |   |   |   |   |        |        |       |       |  |                   |       |       |        |
|-------|---|---|---|---|--------|--------|-------|-------|--|-------------------|-------|-------|--------|
| 3543  |   |   |   |   |        |        |       |       |  | Migration         |       |       |        |
| 2     |   |   |   |   |        |        |       |       |  | Inhibitory Factor |       |       |        |
|       |   |   |   |   |        |        |       |       |  | levels            |       |       |        |
| rs107 |   |   |   |   |        |        |       |       |  | Macrophage        |       |       |        |
| 5549  | G | A | G | A | 0.113  | 0.006  | 0.025 | 0.822 |  | Migration         | 0.000 | 0.025 | 20.983 |
| 0     |   |   |   |   |        |        |       |       |  | Inhibitory Factor |       |       |        |
|       |   |   |   |   |        |        |       |       |  | levels            |       |       |        |
| rs108 |   |   |   |   |        |        |       |       |  | Macrophage        |       |       |        |
| 4750  | T | C | T | C | 0.143  | -0.017 | 0.030 | 0.570 |  | Migration         | 0.000 | 0.031 | 20.856 |
| 6     |   |   |   |   |        |        |       |       |  | Inhibitory Factor |       |       |        |
|       |   |   |   |   |        |        |       |       |  | levels            |       |       |        |
| rs114 |   |   |   |   |        |        |       |       |  | Macrophage        |       |       |        |
| 4348  | G | T | G | T | 0.320  | 0.026  | 0.070 | 0.706 |  | Migration         | 0.000 | 0.070 | 21.218 |
| 04    |   |   |   |   |        |        |       |       |  | Inhibitory Factor |       |       |        |
|       |   |   |   |   |        |        |       |       |  | levels            |       |       |        |
| rs115 |   |   |   |   |        |        |       |       |  | Macrophage        |       |       |        |
| 3438  | G | A | G | A | 0.509  | -0.083 | 0.112 | 0.496 |  | Migration         | 0.000 | 0.077 | 43.169 |
| 10    |   |   |   |   |        |        |       |       |  | Inhibitory Factor |       |       |        |
|       |   |   |   |   |        |        |       |       |  | levels            |       |       |        |
| rs115 |   |   |   |   |        |        |       |       |  | Macrophage        |       |       |        |
| 4284  | T | C | T | C | -0.341 | 0.070  | 0.071 | 0.325 |  | Migration         | 0.000 | 0.066 | 27.047 |
| 18    |   |   |   |   |        |        |       |       |  | Inhibitory Factor |       |       |        |
|       |   |   |   |   |        |        |       |       |  | levels            |       |       |        |
| rs116 |   |   |   |   |        |        |       |       |  | Macrophage        |       |       |        |
| 1808  | A | G | A | G | 0.430  | -0.056 | 0.103 | 0.583 |  | Migration         | 0.000 | 0.081 | 28.240 |
| 34    |   |   |   |   |        |        |       |       |  | Inhibitory Factor |       |       |        |

|       |   |   |   |   |       |        |       |       |  |                   |       |       |        |
|-------|---|---|---|---|-------|--------|-------|-------|--|-------------------|-------|-------|--------|
| rs116 |   |   |   |   |       |        |       |       |  | levels            |       |       |        |
| 7432  | C | T | C | T | 0.472 | -0.023 | 0.065 | 0.703 |  | Macrophage        |       |       |        |
| 28    |   |   |   |   |       |        |       |       |  | Migration         | 0.000 | 0.055 | 74.686 |
|       |   |   |   |   |       |        |       |       |  | Inhibitory Factor |       |       |        |
|       |   |   |   |   |       |        |       |       |  | levels            |       |       |        |
| rs125 |   |   |   |   |       |        |       |       |  | Macrophage        |       |       |        |
| 3240  | A | G | A | G | 0.245 | 0.012  | 0.053 | 0.818 |  | Migration         | 0.000 | 0.049 | 24.910 |
| 8     |   |   |   |   |       |        |       |       |  | Inhibitory Factor |       |       |        |
|       |   |   |   |   |       |        |       |       |  | levels            |       |       |        |
| rs147 |   |   |   |   |       |        |       |       |  | Macrophage        |       |       |        |
| 8390  | G | A | G | A | 0.327 | -0.050 | 0.063 | 0.428 |  | Migration         | 0.000 | 0.053 | 37.633 |
| 99    |   |   |   |   |       |        |       |       |  | Inhibitory Factor |       |       |        |
|       |   |   |   |   |       |        |       |       |  | levels            |       |       |        |
| rs180 |   |   |   |   |       |        |       |       |  | Macrophage        |       |       |        |
| 8413  | T | G | T | G | 0.363 | -0.012 | 0.077 | 0.893 |  | Migration         | 0.000 | 0.076 | 22.971 |
| 91    |   |   |   |   |       |        |       |       |  | Inhibitory Factor |       |       |        |
|       |   |   |   |   |       |        |       |       |  | levels            |       |       |        |
| rs209 |   |   |   |   |       |        |       |       |  | Macrophage        |       |       |        |
| 9700  | A | G | A | G | 0.180 | -0.067 | 0.042 | 0.110 |  | Migration         | 0.000 | 0.039 | 21.283 |
|       |   |   |   |   |       |        |       |       |  | Inhibitory Factor |       |       |        |
|       |   |   |   |   |       |        |       |       |  | levels            |       |       |        |
| rs472 |   |   |   |   |       |        |       |       |  | Macrophage        |       |       |        |
| 6575  | G | T | G | T | 0.167 | 0.022  | 0.025 | 0.393 |  | Migration         | 0.000 | 0.026 | 42.174 |
|       |   |   |   |   |       |        |       |       |  | Inhibitory Factor |       |       |        |
|       |   |   |   |   |       |        |       |       |  | levels            |       |       |        |
| rs645 | T | C | T | C | 0.123 | 0.006  | 0.026 | 0.798 |  | Macrophage        | 0.000 | 0.025 | 24.178 |

| 3912               |   |   |   |   |        |        |       |       | Migration<br>Inhibitory Factor<br>levels<br>Macrophage |       |       |        |
|--------------------|---|---|---|---|--------|--------|-------|-------|--------------------------------------------------------|-------|-------|--------|
| rs650<br>1457      | T | C | T | C | -0.126 | -0.010 | 0.028 | 0.725 | Migration<br>Inhibitory Factor<br>levels<br>Macrophage | 0.000 | 0.027 | 21.665 |
| rs657<br>6081      | C | T | C | T | 0.130  | 0.006  | 0.026 | 0.826 | Migration<br>Inhibitory Factor<br>levels<br>Macrophage | 0.000 | 0.026 | 25.409 |
| rs728<br>1583<br>0 | A | G | A | G | 0.293  | 0.015  | 0.079 | 0.869 | Migration<br>Inhibitory Factor<br>levels<br>Macrophage | 0.000 | 0.060 | 23.542 |
| rs927<br>1367      | A | G | A | G | 0.126  | 0.004  | 0.024 | 0.878 | Migration<br>Inhibitory Factor<br>levels<br>Macrophage | 0.000 | 0.025 | 25.069 |
| rs963<br>5812      | A | G | A | G | -0.133 | -0.006 | 0.027 | 0.835 | Migration<br>Inhibitory Factor<br>levels<br>Macrophage | 0.000 | 0.028 | 22.732 |
| rs984<br>2794      | T | G | T | G | 0.116  | 0.021  | 0.024 | 0.378 | Migration<br>Inhibitory Factor<br>levels<br>Macrophage | 0.000 | 0.025 | 21.947 |

|       |   |   |   |   |        |        |       |       |              | levels |       |        |  |
|-------|---|---|---|---|--------|--------|-------|-------|--------------|--------|-------|--------|--|
| rs100 |   |   |   |   |        |        |       |       |              |        |       |        |  |
| 3543  | A | G | A | G | 0.192  | 0.014  | 0.024 | 0.571 | TRAIL levels | 0.000  | 0.035 | 30.568 |  |
| 2     |   |   |   |   |        |        |       |       |              |        |       |        |  |
| rs107 |   |   |   |   |        |        |       |       |              |        |       |        |  |
| 5549  | G | A | G | A | 0.113  | -0.003 | 0.016 | 0.868 | TRAIL levels | 0.000  | 0.025 | 20.983 |  |
| 0     |   |   |   |   |        |        |       |       |              |        |       |        |  |
| rs108 |   |   |   |   |        |        |       |       |              |        |       |        |  |
| 4750  | T | C | T | C | 0.143  | 0.010  | 0.020 | 0.613 | TRAIL levels | 0.000  | 0.031 | 20.856 |  |
| 6     |   |   |   |   |        |        |       |       |              |        |       |        |  |
| rs114 |   |   |   |   |        |        |       |       |              |        |       |        |  |
| 4348  | G | T | G | T | 0.320  | 0.078  | 0.046 | 0.092 | TRAIL levels | 0.000  | 0.070 | 21.218 |  |
| 04    |   |   |   |   |        |        |       |       |              |        |       |        |  |
| rs115 |   |   |   |   |        |        |       |       |              |        |       |        |  |
| 3438  | G | A | G | A | 0.509  | 0.082  | 0.077 | 0.288 | TRAIL levels | 0.000  | 0.077 | 43.169 |  |
| 10    |   |   |   |   |        |        |       |       |              |        |       |        |  |
| rs115 |   |   |   |   |        |        |       |       |              |        |       |        |  |
| 4284  | T | C | T | C | -0.341 | -0.029 | 0.045 | 0.503 | TRAIL levels | 0.000  | 0.066 | 27.047 |  |
| 18    |   |   |   |   |        |        |       |       |              |        |       |        |  |
| rs116 |   |   |   |   |        |        |       |       |              |        |       |        |  |
| 1808  | A | G | A | G | 0.430  | 0.084  | 0.066 | 0.198 | TRAIL levels | 0.000  | 0.081 | 28.240 |  |
| 34    |   |   |   |   |        |        |       |       |              |        |       |        |  |
| rs116 |   |   |   |   |        |        |       |       |              |        |       |        |  |
| 7432  | C | T | C | T | 0.472  | 0.043  | 0.044 | 0.326 | TRAIL levels | 0.000  | 0.055 | 74.686 |  |
| 28    |   |   |   |   |        |        |       |       |              |        |       |        |  |
| rs125 | A | G | A | G | 0.245  | -0.014 | 0.035 | 0.714 | TRAIL levels | 0.000  | 0.049 | 24.910 |  |

---

|       |   |   |   |   |        |        |       |       |              |       |       |        |  |
|-------|---|---|---|---|--------|--------|-------|-------|--------------|-------|-------|--------|--|
| 3240  |   |   |   |   |        |        |       |       |              |       |       |        |  |
| 8     |   |   |   |   |        |        |       |       |              |       |       |        |  |
| rs147 |   |   |   |   |        |        |       |       |              |       |       |        |  |
| 8390  | G | A | G | A | 0.327  | -0.057 | 0.041 | 0.165 | TRAIL levels | 0.000 | 0.053 | 37.633 |  |
| 99    |   |   |   |   |        |        |       |       |              |       |       |        |  |
| rs180 |   |   |   |   |        |        |       |       |              |       |       |        |  |
| 8413  | T | G | T | G | 0.363  | -0.037 | 0.051 | 0.486 | TRAIL levels | 0.000 | 0.076 | 22.971 |  |
| 91    |   |   |   |   |        |        |       |       |              |       |       |        |  |
| rs191 |   |   |   |   |        |        |       |       |              |       |       |        |  |
| 0413  | T | C | T | C | 0.651  | 0.139  | 0.082 | 0.092 | TRAIL levels | 0.000 | 0.068 | 91.635 |  |
| 65    |   |   |   |   |        |        |       |       |              |       |       |        |  |
| rs209 |   |   |   |   |        |        |       |       |              |       |       |        |  |
| 9700  | A | G | A | G | 0.180  | 0.026  | 0.027 | 0.346 | TRAIL levels | 0.000 | 0.039 | 21.283 |  |
| rs472 |   |   |   |   |        |        |       |       |              |       |       |        |  |
| 6575  | G | T | G | T | 0.167  | 0.007  | 0.016 | 0.655 | TRAIL levels | 0.000 | 0.026 | 42.174 |  |
| rs645 |   |   |   |   |        |        |       |       |              |       |       |        |  |
| 3912  | T | C | T | C | 0.123  | 0.005  | 0.017 | 0.744 | TRAIL levels | 0.000 | 0.025 | 24.178 |  |
| rs650 |   |   |   |   |        |        |       |       |              |       |       |        |  |
| 1457  | T | C | T | C | -0.126 | 0.011  | 0.019 | 0.541 | TRAIL levels | 0.000 | 0.027 | 21.665 |  |
| rs657 |   |   |   |   |        |        |       |       |              |       |       |        |  |
| 6081  | C | T | C | T | 0.130  | -0.022 | 0.017 | 0.219 | TRAIL levels | 0.000 | 0.026 | 25.409 |  |
| rs728 |   |   |   |   |        |        |       |       |              |       |       |        |  |
| 1583  | A | G | A | G | 0.293  | 0.046  | 0.049 | 0.339 | TRAIL levels | 0.000 | 0.060 | 23.542 |  |
| 0     |   |   |   |   |        |        |       |       |              |       |       |        |  |
| rs927 |   |   |   |   |        |        |       |       |              |       |       |        |  |
| 1367  | A | G | A | G | 0.126  | -0.030 | 0.016 | 0.058 | TRAIL levels | 0.000 | 0.025 | 25.069 |  |

---

|                     |   |   |   |   |        |        |       |       |                                      |       |       |        |
|---------------------|---|---|---|---|--------|--------|-------|-------|--------------------------------------|-------|-------|--------|
| rs963<br>5812       | A | G | A | G | -0.133 | 0.013  | 0.017 | 0.465 | TRAIL levels                         | 0.000 | 0.028 | 22.732 |
| rs984<br>2794       | T | G | T | G | 0.116  | 0.003  | 0.016 | 0.864 | TRAIL levels                         | 0.000 | 0.025 | 21.947 |
| rs100<br>3543<br>2  | A | G | A | G | 0.192  | -0.089 | 0.052 | 0.084 | Tumor necrosis<br>factor beta levels | 0.000 | 0.035 | 30.568 |
| rs107<br>5549<br>0  | G | A | G | A | 0.113  | 0.027  | 0.037 | 0.470 | Tumor necrosis<br>factor beta levels | 0.000 | 0.025 | 20.983 |
| rs108<br>4750<br>6  | T | C | T | C | 0.143  | 0.047  | 0.046 | 0.323 | Tumor necrosis<br>factor beta levels | 0.000 | 0.031 | 20.856 |
| rs114<br>4348<br>04 | G | T | G | T | 0.320  | 0.141  | 0.103 | 0.171 | Tumor necrosis<br>factor beta levels | 0.000 | 0.070 | 21.218 |
| rs125<br>3240<br>8  | A | G | A | G | 0.245  | -0.102 | 0.083 | 0.241 | Tumor necrosis<br>factor beta levels | 0.000 | 0.049 | 24.910 |
| rs147<br>8390<br>99 | G | A | G | A | 0.327  | 0.032  | 0.096 | 0.728 | Tumor necrosis<br>factor beta levels | 0.000 | 0.053 | 37.633 |
| rs209<br>9700       | A | G | A | G | 0.180  | -0.038 | 0.064 | 0.553 | Tumor necrosis<br>factor beta levels | 0.000 | 0.039 | 21.283 |
| rs472<br>6575       | G | T | G | T | 0.167  | 0.051  | 0.037 | 0.151 | Tumor necrosis<br>factor beta levels | 0.000 | 0.026 | 42.174 |



|                     |   |   |   |   |        |        |       |       |                                       |       |       |        |
|---------------------|---|---|---|---|--------|--------|-------|-------|---------------------------------------|-------|-------|--------|
| rs645<br>3912       | T | C | T | C | 0.123  | -0.027 | 0.039 | 0.479 | Tumor necrosis<br>factor beta levels  | 0.000 | 0.025 | 24.178 |
| rs650<br>1457       | T | C | T | C | -0.126 | 0.054  | 0.042 | 0.177 | Tumor necrosis<br>factor beta levels  | 0.000 | 0.027 | 21.665 |
| rs657<br>6081       | C | T | C | T | 0.130  | 0.064  | 0.038 | 0.092 | Tumor necrosis<br>factor beta levels  | 0.000 | 0.026 | 25.409 |
| rs927<br>1367       | A | G | A | G | 0.126  | -0.059 | 0.036 | 0.099 | Tumor necrosis<br>factor beta levels  | 0.000 | 0.025 | 25.069 |
| rs963<br>5812       | A | G | A | G | -0.133 | 0.056  | 0.040 | 0.169 | Tumor necrosis<br>factor beta levels  | 0.000 | 0.028 | 22.732 |
| rs984<br>2794       | T | G | T | G | 0.116  | -0.063 | 0.036 | 0.079 | Tumor necrosis<br>factor beta levels  | 0.000 | 0.025 | 21.947 |
| rs100<br>3543<br>2  | A | G | A | G | 0.192  | -0.025 | 0.036 | 0.479 | Tumor necrosis<br>factor alpha levels | 0.000 | 0.035 | 30.568 |
| rs107<br>5549<br>0  | G | A | G | A | 0.113  | 0.001  | 0.025 | 0.972 | Tumor necrosis<br>factor alpha levels | 0.000 | 0.025 | 20.983 |
| rs108<br>4750<br>6  | T | C | T | C | 0.143  | -0.047 | 0.030 | 0.121 | Tumor necrosis<br>factor alpha levels | 0.000 | 0.031 | 20.856 |
| rs114<br>4348<br>04 | G | T | G | T | 0.320  | 0.079  | 0.072 | 0.273 | Tumor necrosis<br>factor alpha levels | 0.000 | 0.070 | 21.218 |
| rs115<br>3438       | G | A | G | A | 0.509  | 0.035  | 0.115 | 0.793 | Tumor necrosis<br>factor alpha levels | 0.000 | 0.077 | 43.169 |

|                           |   |   |   |   |        |        |       |       |                                       |       |       |        |
|---------------------------|---|---|---|---|--------|--------|-------|-------|---------------------------------------|-------|-------|--------|
| 10<br>rs115<br>4284<br>18 | T | C | T | C | -0.341 | 0.037  | 0.071 | 0.584 | Tumor necrosis<br>factor alpha levels | 0.000 | 0.066 | 27.047 |
| rs116<br>1808<br>34       | A | G | A | G | 0.430  | 0.103  | 0.101 | 0.301 | Tumor necrosis<br>factor alpha levels | 0.000 | 0.081 | 28.240 |
| rs116<br>7432<br>28       | C | T | C | T | 0.472  | -0.004 | 0.065 | 0.947 | Tumor necrosis<br>factor alpha levels | 0.000 | 0.055 | 74.686 |
| rs125<br>3240<br>8        | A | G | A | G | 0.245  | -0.044 | 0.054 | 0.430 | Tumor necrosis<br>factor alpha levels | 0.000 | 0.049 | 24.910 |
| rs147<br>8390<br>99       | G | A | G | A | 0.327  | 0.106  | 0.064 | 0.094 | Tumor necrosis<br>factor alpha levels | 0.000 | 0.053 | 37.633 |
| rs180<br>8413<br>91       | T | G | T | G | 0.363  | 0.071  | 0.077 | 0.383 | Tumor necrosis<br>factor alpha levels | 0.000 | 0.076 | 22.971 |
| rs209<br>9700             | A | G | A | G | 0.180  | 0.026  | 0.042 | 0.523 | Tumor necrosis<br>factor alpha levels | 0.000 | 0.039 | 21.283 |
| rs472<br>6575             | G | T | G | T | 0.167  | 0.004  | 0.025 | 0.882 | Tumor necrosis<br>factor alpha levels | 0.000 | 0.026 | 42.174 |
| rs645<br>3912             | T | C | T | C | 0.123  | -0.002 | 0.026 | 0.962 | Tumor necrosis<br>factor alpha levels | 0.000 | 0.025 | 24.178 |
| rs650                     | T | C | T | C | -0.126 | -0.022 | 0.028 | 0.440 | Tumor necrosis                        | 0.000 | 0.027 | 21.665 |

|       |   |   |   |   |        |        |       |       |  |                     |       |       |        |
|-------|---|---|---|---|--------|--------|-------|-------|--|---------------------|-------|-------|--------|
| 1457  |   |   |   |   |        |        |       |       |  | factor alpha levels |       |       |        |
| rs657 | C | T | C | T | 0.130  | -0.004 | 0.026 | 0.873 |  | Tumor necrosis      | 0.000 | 0.026 | 25.409 |
| 6081  |   |   |   |   |        |        |       |       |  | factor alpha levels |       |       |        |
| rs728 |   |   |   |   |        |        |       |       |  |                     |       |       |        |
| 1583  | A | G | A | G | 0.293  | 0.056  | 0.082 | 0.485 |  | Tumor necrosis      | 0.000 | 0.060 | 23.542 |
| 0     |   |   |   |   |        |        |       |       |  | factor alpha levels |       |       |        |
| rs927 | A | G | A | G | 0.126  | -0.015 | 0.024 | 0.526 |  | Tumor necrosis      | 0.000 | 0.025 | 25.069 |
| 1367  |   |   |   |   |        |        |       |       |  | factor alpha levels |       |       |        |
| rs963 | A | G | A | G | -0.133 | -0.010 | 0.027 | 0.712 |  | Tumor necrosis      | 0.000 | 0.028 | 22.732 |
| 5812  |   |   |   |   |        |        |       |       |  | factor alpha levels |       |       |        |
| rs984 | T | G | T | G | 0.116  | -0.008 | 0.024 | 0.738 |  | Tumor necrosis      | 0.000 | 0.025 | 21.947 |
| 2794  |   |   |   |   |        |        |       |       |  | factor alpha levels |       |       |        |
| rs100 |   |   |   |   |        |        |       |       |  |                     |       |       |        |
| 3543  | A | G | A | G | 0.192  | 0.005  | 0.025 | 0.862 |  | Stromal-cell-deriv  | 0.000 | 0.035 | 30.568 |
| 2     |   |   |   |   |        |        |       |       |  | ed factor 1 alpha   |       |       |        |
| rs107 |   |   |   |   |        |        |       |       |  | levels              |       |       |        |
| 5549  | G | A | G | A | 0.113  | 0.001  | 0.017 | 0.970 |  | Stromal-cell-deriv  | 0.000 | 0.025 | 20.983 |
| 0     |   |   |   |   |        |        |       |       |  | ed factor 1 alpha   |       |       |        |
| rs108 |   |   |   |   |        |        |       |       |  | levels              |       |       |        |
| 4750  | T | C | T | C | 0.143  | 0.032  | 0.020 | 0.023 |  | Stromal-cell-deriv  | 0.000 | 0.031 | 20.856 |
| 6     |   |   |   |   |        |        |       |       |  | ed factor 1 alpha   |       |       |        |
| rs114 |   |   |   |   |        |        |       |       |  | levels              |       |       |        |
| 4348  | G | T | G | T | 0.320  | -0.015 | 0.047 | 0.968 |  | Stromal-cell-deriv  | 0.000 | 0.070 | 21.218 |
| 04    |   |   |   |   |        |        |       |       |  | ed factor 1 alpha   |       |       |        |
| rs115 |   |   |   |   |        |        |       |       |  | levels              |       |       |        |
| 3438  | G | A | G | A | 0.509  | -0.003 | 0.089 | 0.564 |  | Stromal-cell-deriv  | 0.000 | 0.077 | 43.169 |
|       |   |   |   |   |        |        |       |       |  | ed factor 1 alpha   |       |       |        |

|       |   |   |   |   |        |        |       |       |  |                    |       |       |        |
|-------|---|---|---|---|--------|--------|-------|-------|--|--------------------|-------|-------|--------|
| 10    |   |   |   |   |        |        |       |       |  | levels             |       |       |        |
| rs115 |   |   |   |   |        |        |       |       |  | Stromal-cell-deriv |       |       |        |
| 4284  | T | C | T | C | -0.341 | 0.101  | 0.047 | 0.042 |  | ed factor 1 alpha  | 0.000 | 0.066 | 27.047 |
| 18    |   |   |   |   |        |        |       |       |  | levels             |       |       |        |
| rs116 |   |   |   |   |        |        |       |       |  | Stromal-cell-deriv |       |       |        |
| 1808  | A | G | A | G | 0.430  | 0.111  | 0.068 | 0.597 |  | ed factor 1 alpha  | 0.000 | 0.081 | 28.240 |
| 34    |   |   |   |   |        |        |       |       |  | levels             |       |       |        |
| rs116 |   |   |   |   |        |        |       |       |  | Stromal-cell-deriv |       |       |        |
| 7432  | C | T | C | T | 0.472  | 0.003  | 0.045 | 0.529 |  | ed factor 1 alpha  | 0.000 | 0.055 | 74.686 |
| 28    |   |   |   |   |        |        |       |       |  | levels             |       |       |        |
| rs125 |   |   |   |   |        |        |       |       |  | Stromal-cell-deriv |       |       |        |
| 3240  | A | G | A | G | 0.245  | -0.031 | 0.036 | 0.820 |  | ed factor 1 alpha  | 0.000 | 0.049 | 24.910 |
| 8     |   |   |   |   |        |        |       |       |  | levels             |       |       |        |
| rs147 |   |   |   |   |        |        |       |       |  | Stromal-cell-deriv |       |       |        |
| 8390  | G | A | G | A | 0.327  | 0.011  | 0.043 | 0.295 |  | ed factor 1 alpha  | 0.000 | 0.053 | 37.633 |
| 99    |   |   |   |   |        |        |       |       |  | levels             |       |       |        |
| rs180 |   |   |   |   |        |        |       |       |  | Stromal-cell-deriv |       |       |        |
| 8413  | T | G | T | G | 0.363  | -0.014 | 0.052 | 0.688 |  | ed factor 1 alpha  | 0.000 | 0.076 | 22.971 |
| 91    |   |   |   |   |        |        |       |       |  | levels             |       |       |        |
| rs191 |   |   |   |   |        |        |       |       |  | Stromal-cell-deriv |       |       |        |
| 0413  | T | C | T | C | 0.651  | -0.050 | 0.085 | 0.883 |  | ed factor 1 alpha  | 0.000 | 0.068 | 91.635 |
| 65    |   |   |   |   |        |        |       |       |  | levels             |       |       |        |
| rs209 |   |   |   |   |        |        |       |       |  | Stromal-cell-deriv |       |       |        |
| 9700  | A | G | A | G | 0.180  | 0.007  | 0.028 | 0.432 |  | ed factor 1 alpha  | 0.000 | 0.039 | 21.283 |
|       |   |   |   |   |        |        |       |       |  | levels             |       |       |        |
| rs472 | G | T | G | T | 0.167  | 0.009  | 0.017 | 0.847 |  | Stromal-cell-deriv | 0.000 | 0.026 | 42.174 |

|            |   |   |   |   |        |        |       |       |  |                                            |       |       |        |
|------------|---|---|---|---|--------|--------|-------|-------|--|--------------------------------------------|-------|-------|--------|
| 6575       |   |   |   |   |        |        |       |       |  | ed factor 1 alpha levels                   |       |       |        |
| rs6453912  | T | C | T | C | 0.123  | 0.015  | 0.017 | 0.609 |  | Stromal-cell-derived factor 1 alpha levels | 0.000 | 0.025 | 24.178 |
| rs6501457  | T | C | T | C | -0.126 | 0.045  | 0.019 | 0.065 |  | Stromal-cell-derived factor 1 alpha levels | 0.000 | 0.027 | 21.665 |
| rs6576081  | C | T | C | T | 0.130  | 0.034  | 0.018 | 0.019 |  | Stromal-cell-derived factor 1 alpha levels | 0.000 | 0.026 | 25.409 |
| rs72815830 | A | G | A | G | 0.293  | 0.140  | 0.051 | 0.036 |  | Stromal-cell-derived factor 1 alpha levels | 0.000 | 0.060 | 23.542 |
| rs9271367  | A | G | A | G | 0.126  | -0.010 | 0.016 | 0.594 |  | Stromal-cell-derived factor 1 alpha levels | 0.000 | 0.025 | 25.069 |
| rs9635812  | A | G | A | G | -0.133 | -0.004 | 0.018 | 0.616 |  | Stromal-cell-derived factor 1 alpha levels | 0.000 | 0.028 | 22.732 |
| rs9842794  | T | G | T | G | 0.116  | 0.004  | 0.016 | 0.974 |  | Stromal-cell-derived factor 1 alpha levels | 0.000 | 0.025 | 21.947 |
| rs10035432 | A | G | A | G | 0.192  | 0.043  | 0.035 | 0.208 |  | Stem cell growth factor beta levels        | 0.000 | 0.035 | 30.568 |

|                     |   |   |   |   |        |        |       |       |                                        |       |       |        |
|---------------------|---|---|---|---|--------|--------|-------|-------|----------------------------------------|-------|-------|--------|
| rs107<br>5549<br>0  | G | A | G | A | 0.113  | 0.031  | 0.024 | 0.197 | Stem cell growth<br>factor beta levels | 0.000 | 0.025 | 20.983 |
| rs108<br>4750<br>6  | T | C | T | C | 0.143  | -0.027 | 0.030 | 0.375 | Stem cell growth<br>factor beta levels | 0.000 | 0.031 | 20.856 |
| rs114<br>4348<br>04 | G | T | G | T | 0.320  | 0.115  | 0.069 | 0.091 | Stem cell growth<br>factor beta levels | 0.000 | 0.070 | 21.218 |
| rs115<br>3438<br>10 | G | A | G | A | 0.509  | -0.140 | 0.111 | 0.204 | Stem cell growth<br>factor beta levels | 0.000 | 0.077 | 43.169 |
| rs115<br>4284<br>18 | T | C | T | C | -0.341 | -0.055 | 0.069 | 0.468 | Stem cell growth<br>factor beta levels | 0.000 | 0.066 | 27.047 |
| rs116<br>1808<br>34 | A | G | A | G | 0.430  | 0.006  | 0.098 | 0.932 | Stem cell growth<br>factor beta levels | 0.000 | 0.081 | 28.240 |
| rs116<br>7432<br>28 | C | T | C | T | 0.472  | 0.017  | 0.063 | 0.762 | Stem cell growth<br>factor beta levels | 0.000 | 0.055 | 74.686 |
| rs125<br>3240<br>8  | A | G | A | G | 0.245  | 0.063  | 0.052 | 0.221 | Stem cell growth<br>factor beta levels | 0.000 | 0.049 | 24.910 |
| rs147<br>8390       | G | A | G | A | 0.327  | 0.009  | 0.061 | 0.894 | Stem cell growth<br>factor beta levels | 0.000 | 0.053 | 37.633 |



|                     |   |   |   |   |        |        |       |       |                            |       |       |        |
|---------------------|---|---|---|---|--------|--------|-------|-------|----------------------------|-------|-------|--------|
| rs107<br>5549<br>0  | G | A | G | A | 0.113  | 0.015  | 0.016 | 0.366 | Stem cell factor<br>levels | 0.000 | 0.025 | 20.983 |
| rs108<br>4750<br>6  | T | C | T | C | 0.143  | 0.017  | 0.020 | 0.394 | Stem cell factor<br>levels | 0.000 | 0.031 | 20.856 |
| rs114<br>4348<br>04 | G | T | G | T | 0.320  | 0.002  | 0.046 | 0.960 | Stem cell factor<br>levels | 0.000 | 0.070 | 21.218 |
| rs115<br>3438<br>10 | G | A | G | A | 0.509  | 0.073  | 0.076 | 0.337 | Stem cell factor<br>levels | 0.000 | 0.077 | 43.169 |
| rs115<br>4284<br>18 | T | C | T | C | -0.341 | 0.009  | 0.045 | 0.826 | Stem cell factor<br>levels | 0.000 | 0.066 | 27.047 |
| rs116<br>1808<br>34 | A | G | A | G | 0.430  | 0.002  | 0.065 | 0.973 | Stem cell factor<br>levels | 0.000 | 0.081 | 28.240 |
| rs116<br>7432<br>28 | C | T | C | T | 0.472  | 0.034  | 0.043 | 0.441 | Stem cell factor<br>levels | 0.000 | 0.055 | 74.686 |
| rs125<br>3240<br>8  | A | G | A | G | 0.245  | -0.004 | 0.035 | 0.905 | Stem cell factor<br>levels | 0.000 | 0.049 | 24.910 |
| rs147<br>8390       | G | A | G | A | 0.327  | 0.059  | 0.041 | 0.148 | Stem cell factor<br>levels | 0.000 | 0.053 | 37.633 |



|       |   |   |   |   |        |        |       |       |                         |       |       |        |  |
|-------|---|---|---|---|--------|--------|-------|-------|-------------------------|-------|-------|--------|--|
| 99    |   |   |   |   |        |        |       |       |                         |       |       |        |  |
| rs180 |   |   |   |   |        |        |       |       |                         |       |       |        |  |
| 8413  | T | G | T | G | 0.363  | -0.051 | 0.050 | 0.316 | Stem cell factor levels | 0.000 | 0.076 | 22.971 |  |
| 91    |   |   |   |   |        |        |       |       |                         |       |       |        |  |
| rs191 |   |   |   |   |        |        |       |       |                         |       |       |        |  |
| 0413  | T | C | T | C | 0.651  | -0.040 | 0.082 | 0.630 | Stem cell factor levels | 0.000 | 0.068 | 91.635 |  |
| 65    |   |   |   |   |        |        |       |       |                         |       |       |        |  |
| rs209 |   |   |   |   |        |        |       |       |                         |       |       |        |  |
| 9700  | A | G | A | G | 0.180  | 0.051  | 0.027 | 0.059 | Stem cell factor levels | 0.000 | 0.039 | 21.283 |  |
| rs472 |   |   |   |   |        |        |       |       |                         |       |       |        |  |
| 6575  | G | T | G | T | 0.167  | 0.006  | 0.016 | 0.706 | Stem cell factor levels | 0.000 | 0.026 | 42.174 |  |
| rs645 |   |   |   |   |        |        |       |       |                         |       |       |        |  |
| 3912  | T | C | T | C | 0.123  | -0.026 | 0.017 | 0.129 | Stem cell factor levels | 0.000 | 0.025 | 24.178 |  |
| rs650 |   |   |   |   |        |        |       |       |                         |       |       |        |  |
| 1457  | T | C | T | C | -0.126 | 0.029  | 0.018 | 0.116 | Stem cell factor levels | 0.000 | 0.027 | 21.665 |  |
| rs657 |   |   |   |   |        |        |       |       |                         |       |       |        |  |
| 6081  | C | T | C | T | 0.130  | -0.033 | 0.017 | 0.054 | Stem cell factor levels | 0.000 | 0.026 | 25.409 |  |
| rs728 |   |   |   |   |        |        |       |       |                         |       |       |        |  |
| 1583  | A | G | A | G | 0.293  | 0.125  | 0.049 | 0.011 | Stem cell factor levels | 0.000 | 0.060 | 23.542 |  |
| 0     |   |   |   |   |        |        |       |       |                         |       |       |        |  |
| rs927 |   |   |   |   |        |        |       |       |                         |       |       |        |  |
| 1367  | A | G | A | G | 0.126  | 0.035  | 0.016 | 0.026 | Stem cell factor levels | 0.000 | 0.025 | 25.069 |  |
| rs963 |   |   |   |   |        |        |       |       |                         |       |       |        |  |
| 5812  | A | G | A | G | -0.133 | 0.023  | 0.017 | 0.175 | Stem cell factor levels | 0.000 | 0.028 | 22.732 |  |
| rs984 |   |   |   |   |        |        |       |       |                         |       |       |        |  |
| 2794  | T | G | T | G | 0.116  | 0.005  | 0.016 | 0.730 | Stem cell factor levels | 0.000 | 0.025 | 21.947 |  |

|                     |   |   |   |   |        |        |       |       |                          |       |       |        |
|---------------------|---|---|---|---|--------|--------|-------|-------|--------------------------|-------|-------|--------|
| rs100<br>3543<br>2  | A | G | A | G | 0.192  | 0.123  | 0.036 | 0.001 | Interleukin-16<br>levels | 0.000 | 0.035 | 30.568 |
| rs107<br>5549<br>0  | G | A | G | A | 0.113  | -0.018 | 0.025 | 0.447 | Interleukin-16<br>levels | 0.000 | 0.025 | 20.983 |
| rs108<br>4750<br>6  | T | C | T | C | 0.143  | -0.012 | 0.030 | 0.702 | Interleukin-16<br>levels | 0.000 | 0.031 | 20.856 |
| rs114<br>4348<br>04 | G | T | G | T | 0.320  | -0.032 | 0.071 | 0.654 | Interleukin-16<br>levels | 0.000 | 0.070 | 21.218 |
| rs115<br>3438<br>10 | G | A | G | A | 0.509  | 0.082  | 0.117 | 0.480 | Interleukin-16<br>levels | 0.000 | 0.077 | 43.169 |
| rs115<br>4284<br>18 | T | C | T | C | -0.341 | -0.003 | 0.070 | 0.954 | Interleukin-16<br>levels | 0.000 | 0.066 | 27.047 |
| rs116<br>1808<br>34 | A | G | A | G | 0.430  | 0.012  | 0.098 | 0.902 | Interleukin-16<br>levels | 0.000 | 0.081 | 28.240 |
| rs116<br>7432<br>28 | C | T | C | T | 0.472  | -0.085 | 0.065 | 0.215 | Interleukin-16<br>levels | 0.000 | 0.055 | 74.686 |
| rs125<br>3240       | A | G | A | G | 0.245  | -0.051 | 0.054 | 0.338 | Interleukin-16<br>levels | 0.000 | 0.049 | 24.910 |

|       |   |   |   |   |        |        |       |       |                       |       |       |        |  |
|-------|---|---|---|---|--------|--------|-------|-------|-----------------------|-------|-------|--------|--|
| 8     |   |   |   |   |        |        |       |       |                       |       |       |        |  |
| rs147 |   |   |   |   |        |        |       |       |                       |       |       |        |  |
| 8390  | G | A | G | A | 0.327  | -0.028 | 0.063 | 0.672 | Interleukin-16 levels | 0.000 | 0.053 | 37.633 |  |
| 99    |   |   |   |   |        |        |       |       |                       |       |       |        |  |
| rs180 |   |   |   |   |        |        |       |       |                       |       |       |        |  |
| 8413  | T | G | T | G | 0.363  | -0.031 | 0.076 | 0.684 | Interleukin-16 levels | 0.000 | 0.076 | 22.971 |  |
| 91    |   |   |   |   |        |        |       |       |                       |       |       |        |  |
| rs209 |   |   |   |   |        |        |       |       |                       |       |       |        |  |
| 9700  | A | G | A | G | 0.180  | -0.045 | 0.042 | 0.278 | Interleukin-16 levels | 0.000 | 0.039 | 21.283 |  |
| rs472 |   |   |   |   |        |        |       |       |                       |       |       |        |  |
| 6575  | G | T | G | T | 0.167  | -0.002 | 0.025 | 0.952 | Interleukin-16 levels | 0.000 | 0.026 | 42.174 |  |
| rs645 |   |   |   |   |        |        |       |       |                       |       |       |        |  |
| 3912  | T | C | T | C | 0.123  | 0.017  | 0.026 | 0.518 | Interleukin-16 levels | 0.000 | 0.025 | 24.178 |  |
| rs650 |   |   |   |   |        |        |       |       |                       |       |       |        |  |
| 1457  | T | C | T | C | -0.126 | 0.022  | 0.028 | 0.435 | Interleukin-16 levels | 0.000 | 0.027 | 21.665 |  |
| rs657 |   |   |   |   |        |        |       |       |                       |       |       |        |  |
| 6081  | C | T | C | T | 0.130  | 0.012  | 0.026 | 0.663 | Interleukin-16 levels | 0.000 | 0.026 | 25.409 |  |
| rs728 |   |   |   |   |        |        |       |       |                       |       |       |        |  |
| 1583  | A | G | A | G | 0.293  | 0.139  | 0.078 | 0.075 | Interleukin-16 levels | 0.000 | 0.060 | 23.542 |  |
| 0     |   |   |   |   |        |        |       |       |                       |       |       |        |  |
| rs927 |   |   |   |   |        |        |       |       |                       |       |       |        |  |
| 1367  | A | G | A | G | 0.126  | 0.004  | 0.024 | 0.861 | Interleukin-16 levels | 0.000 | 0.025 | 25.069 |  |
| rs963 |   |   |   |   |        |        |       |       |                       |       |       |        |  |
| 5812  | A | G | A | G | -0.133 | -0.038 | 0.026 | 0.147 | Interleukin-16 levels | 0.000 | 0.028 | 22.732 |  |
| rs984 |   |   |   |   |        |        |       |       |                       |       |       |        |  |
| 2794  | T | G | T | G | 0.116  | 0.011  | 0.024 | 0.643 | Interleukin-16 levels | 0.000 | 0.025 | 21.947 |  |

|                     |   |   |   |   |        |        |       |       |               |       |       |        |
|---------------------|---|---|---|---|--------|--------|-------|-------|---------------|-------|-------|--------|
| rs100<br>3543<br>2  | A | G | A | G | 0.192  | 0.001  | 0.036 | 0.986 | RANTES levels | 0.000 | 0.035 | 30.568 |
| rs107<br>5549<br>0  | G | A | G | A | 0.113  | -0.003 | 0.025 | 0.916 | RANTES levels | 0.000 | 0.025 | 20.983 |
| rs108<br>4750<br>6  | T | C | T | C | 0.143  | -0.037 | 0.031 | 0.227 | RANTES levels | 0.000 | 0.031 | 20.856 |
| rs114<br>4348<br>04 | G | T | G | T | 0.320  | 0.083  | 0.071 | 0.245 | RANTES levels | 0.000 | 0.070 | 21.218 |
| rs115<br>3438<br>10 | G | A | G | A | 0.509  | -0.184 | 0.114 | 0.110 | RANTES levels | 0.000 | 0.077 | 43.169 |
| rs115<br>4284<br>18 | T | C | T | C | -0.341 | 0.015  | 0.072 | 0.848 | RANTES levels | 0.000 | 0.066 | 27.047 |
| rs116<br>1808<br>34 | A | G | A | G | 0.430  | 0.087  | 0.099 | 0.381 | RANTES levels | 0.000 | 0.081 | 28.240 |
| rs116<br>7432<br>28 | C | T | C | T | 0.472  | 0.034  | 0.064 | 0.545 | RANTES levels | 0.000 | 0.055 | 74.686 |
| rs125<br>3240       | A | G | A | G | 0.245  | -0.038 | 0.054 | 0.462 | RANTES levels | 0.000 | 0.049 | 24.910 |

---

|       |   |   |   |   |        |        |       |       |               |       |       |        |  |
|-------|---|---|---|---|--------|--------|-------|-------|---------------|-------|-------|--------|--|
| 8     |   |   |   |   |        |        |       |       |               |       |       |        |  |
| rs147 |   |   |   |   |        |        |       |       |               |       |       |        |  |
| 8390  | G | A | G | A | 0.327  | 0.023  | 0.062 | 0.701 | RANTES levels | 0.000 | 0.053 | 37.633 |  |
| 99    |   |   |   |   |        |        |       |       |               |       |       |        |  |
| rs180 |   |   |   |   |        |        |       |       |               |       |       |        |  |
| 8413  | T | G | T | G | 0.363  | 0.120  | 0.079 | 0.140 | RANTES levels | 0.000 | 0.076 | 22.971 |  |
| 91    |   |   |   |   |        |        |       |       |               |       |       |        |  |
| rs209 |   |   |   |   |        |        |       |       |               |       |       |        |  |
| 9700  | A | G | A | G | 0.180  | 0.024  | 0.043 | 0.574 | RANTES levels | 0.000 | 0.039 | 21.283 |  |
| rs472 |   |   |   |   |        |        |       |       |               |       |       |        |  |
| 6575  | G | T | G | T | 0.167  | 0.019  | 0.025 | 0.446 | RANTES levels | 0.000 | 0.026 | 42.174 |  |
| rs645 |   |   |   |   |        |        |       |       |               |       |       |        |  |
| 3912  | T | C | T | C | 0.123  | -0.051 | 0.026 | 0.051 | RANTES levels | 0.000 | 0.025 | 24.178 |  |
| rs650 |   |   |   |   |        |        |       |       |               |       |       |        |  |
| 1457  | T | C | T | C | -0.126 | -0.032 | 0.028 | 0.262 | RANTES levels | 0.000 | 0.027 | 21.665 |  |
| rs657 |   |   |   |   |        |        |       |       |               |       |       |        |  |
| 6081  | C | T | C | T | 0.130  | 0.016  | 0.026 | 0.573 | RANTES levels | 0.000 | 0.026 | 25.409 |  |
| rs728 |   |   |   |   |        |        |       |       |               |       |       |        |  |
| 1583  | A | G | A | G | 0.293  | 0.069  | 0.081 | 0.397 | RANTES levels | 0.000 | 0.060 | 23.542 |  |
| 0     |   |   |   |   |        |        |       |       |               |       |       |        |  |
| rs927 |   |   |   |   |        |        |       |       |               |       |       |        |  |
| 1367  | A | G | A | G | 0.126  | -0.021 | 0.025 | 0.382 | RANTES levels | 0.000 | 0.025 | 25.069 |  |
| rs963 |   |   |   |   |        |        |       |       |               |       |       |        |  |
| 5812  | A | G | A | G | -0.133 | 0.037  | 0.027 | 0.174 | RANTES levels | 0.000 | 0.028 | 22.732 |  |
| rs984 |   |   |   |   |        |        |       |       |               |       |       |        |  |
| 2794  | T | G | T | G | 0.116  | -0.022 | 0.024 | 0.378 | RANTES levels | 0.000 | 0.025 | 21.947 |  |

---

|       |   |   |   |   |        |        |       |       |  |                  |       |       |        |
|-------|---|---|---|---|--------|--------|-------|-------|--|------------------|-------|-------|--------|
| rs100 |   |   |   |   |        |        |       |       |  | Platelet-derived |       |       |        |
| 3543  | A | G | A | G | 0.192  | 0.031  | 0.024 | 0.217 |  | growth factor BB | 0.000 | 0.035 | 30.568 |
| 2     |   |   |   |   |        |        |       |       |  | levels           |       |       |        |
| rs107 |   |   |   |   |        |        |       |       |  | Platelet-derived |       |       |        |
| 5549  | G | A | G | A | 0.113  | 0.017  | 0.016 | 0.305 |  | growth factor BB | 0.000 | 0.025 | 20.983 |
| 0     |   |   |   |   |        |        |       |       |  | levels           |       |       |        |
| rs108 |   |   |   |   |        |        |       |       |  | Platelet-derived |       |       |        |
| 4750  | T | C | T | C | 0.143  | -0.003 | 0.020 | 0.882 |  | growth factor BB | 0.000 | 0.031 | 20.856 |
| 6     |   |   |   |   |        |        |       |       |  | levels           |       |       |        |
| rs114 |   |   |   |   |        |        |       |       |  | Platelet-derived |       |       |        |
| 4348  | G | T | G | T | 0.320  | 0.110  | 0.046 | 0.016 |  | growth factor BB | 0.000 | 0.070 | 21.218 |
| 04    |   |   |   |   |        |        |       |       |  | levels           |       |       |        |
| rs115 |   |   |   |   |        |        |       |       |  | Platelet-derived |       |       |        |
| 3438  | G | A | G | A | 0.509  | 0.007  | 0.077 | 0.921 |  | growth factor BB | 0.000 | 0.077 | 43.169 |
| 10    |   |   |   |   |        |        |       |       |  | levels           |       |       |        |
| rs115 |   |   |   |   |        |        |       |       |  | Platelet-derived |       |       |        |
| 4284  | T | C | T | C | -0.341 | 0.170  | 0.046 | 0.000 |  | growth factor BB | 0.000 | 0.066 | 27.047 |
| 18    |   |   |   |   |        |        |       |       |  | levels           |       |       |        |
| rs116 |   |   |   |   |        |        |       |       |  | Platelet-derived |       |       |        |
| 1808  | A | G | A | G | 0.430  | -0.066 | 0.065 | 0.314 |  | growth factor BB | 0.000 | 0.081 | 28.240 |
| 34    |   |   |   |   |        |        |       |       |  | levels           |       |       |        |
| rs116 |   |   |   |   |        |        |       |       |  | Platelet-derived |       |       |        |
| 7432  | C | T | C | T | 0.472  | 0.029  | 0.044 | 0.537 |  | growth factor BB | 0.000 | 0.055 | 74.686 |
| 28    |   |   |   |   |        |        |       |       |  | levels           |       |       |        |
| rs125 |   |   |   |   |        |        |       |       |  | Platelet-derived |       |       |        |
| 3240  | A | G | A | G | 0.245  | 0.056  | 0.035 | 0.105 |  | growth factor BB | 0.000 | 0.049 | 24.910 |

|       |   |   |   |   |        |        |       |       |  |                  |       |       |        |
|-------|---|---|---|---|--------|--------|-------|-------|--|------------------|-------|-------|--------|
| 8     |   |   |   |   |        |        |       |       |  | levels           |       |       |        |
| rs147 |   |   |   |   |        |        |       |       |  | Platelet-derived |       |       |        |
| 8390  | G | A | G | A | 0.327  | 0.054  | 0.042 | 0.207 |  | growth factor BB | 0.000 | 0.053 | 37.633 |
| 99    |   |   |   |   |        |        |       |       |  | levels           |       |       |        |
| rs180 |   |   |   |   |        |        |       |       |  | Platelet-derived |       |       |        |
| 8413  | T | G | T | G | 0.363  | -0.023 | 0.050 | 0.617 |  | growth factor BB | 0.000 | 0.076 | 22.971 |
| 91    |   |   |   |   |        |        |       |       |  | levels           |       |       |        |
| rs191 |   |   |   |   |        |        |       |       |  | Platelet-derived |       |       |        |
| 0413  | T | C | T | C | 0.651  | 0.053  | 0.084 | 0.543 |  | growth factor BB | 0.000 | 0.068 | 91.635 |
| 65    |   |   |   |   |        |        |       |       |  | levels           |       |       |        |
| rs209 |   |   |   |   |        |        |       |       |  | Platelet-derived |       |       |        |
| 9700  | A | G | A | G | 0.180  | 0.013  | 0.027 | 0.638 |  | growth factor BB | 0.000 | 0.039 | 21.283 |
|       |   |   |   |   |        |        |       |       |  | levels           |       |       |        |
| rs472 |   |   |   |   |        |        |       |       |  | Platelet-derived |       |       |        |
| 6575  | G | T | G | T | 0.167  | -0.001 | 0.016 | 0.972 |  | growth factor BB | 0.000 | 0.026 | 42.174 |
|       |   |   |   |   |        |        |       |       |  | levels           |       |       |        |
| rs645 |   |   |   |   |        |        |       |       |  | Platelet-derived |       |       |        |
| 3912  | T | C | T | C | 0.123  | 0.006  | 0.017 | 0.705 |  | growth factor BB | 0.000 | 0.025 | 24.178 |
|       |   |   |   |   |        |        |       |       |  | levels           |       |       |        |
| rs650 |   |   |   |   |        |        |       |       |  | Platelet-derived |       |       |        |
| 1457  | T | C | T | C | -0.126 | 0.012  | 0.018 | 0.525 |  | growth factor BB | 0.000 | 0.027 | 21.665 |
|       |   |   |   |   |        |        |       |       |  | levels           |       |       |        |
| rs657 |   |   |   |   |        |        |       |       |  | Platelet-derived |       |       |        |
| 6081  | C | T | C | T | 0.130  | 0.053  | 0.017 | 0.002 |  | growth factor BB | 0.000 | 0.026 | 25.409 |
|       |   |   |   |   |        |        |       |       |  | levels           |       |       |        |
| rs728 | A | G | A | G | 0.293  | 0.002  | 0.049 | 0.947 |  | Platelet-derived | 0.000 | 0.060 | 23.542 |

|             |   |   |   |   |        |        |       |       |  |                                           |       |       |        |
|-------------|---|---|---|---|--------|--------|-------|-------|--|-------------------------------------------|-------|-------|--------|
| 15830       |   |   |   |   |        |        |       |       |  | growth factor BB levels                   |       |       |        |
| rs9271367   | A | G | A | G | 0.126  | -0.017 | 0.016 | 0.281 |  | Platelet-derived growth factor BB levels  | 0.000 | 0.025 | 25.069 |
| rs9635812   | A | G | A | G | -0.133 | -0.014 | 0.017 | 0.425 |  | Platelet-derived growth factor BB levels  | 0.000 | 0.028 | 22.732 |
| rs9842794   | T | G | T | G | 0.116  | 0.003  | 0.016 | 0.844 |  | Platelet-derived growth factor BB levels  | 0.000 | 0.025 | 21.947 |
| rs10035432  | A | G | A | G | 0.192  | 0.014  | 0.024 | 0.595 |  | Macrophage inflammatory protein 1b levels | 0.000 | 0.035 | 30.568 |
| rs10755490  | G | A | G | A | 0.113  | 0.026  | 0.016 | 0.107 |  | Macrophage inflammatory protein 1b levels | 0.000 | 0.025 | 20.983 |
| rs10847506  | T | C | T | C | 0.143  | -0.002 | 0.020 | 0.907 |  | Macrophage inflammatory protein 1b levels | 0.000 | 0.031 | 20.856 |
| rs114434804 | G | T | G | T | 0.320  | 0.024  | 0.046 | 0.586 |  | Macrophage inflammatory protein 1b levels | 0.000 | 0.070 | 21.218 |
| rs115343810 | G | A | G | A | 0.509  | 0.021  | 0.076 | 0.777 |  | Macrophage inflammatory protein 1b levels | 0.000 | 0.077 | 43.169 |



|       |   |   |   |   |        |        |       |       |  |                   |       |       |        |
|-------|---|---|---|---|--------|--------|-------|-------|--|-------------------|-------|-------|--------|
| rs115 |   |   |   |   |        |        |       |       |  | Macrophage        |       |       |        |
| 4284  | T | C | T | C | -0.341 | 0.063  | 0.046 | 0.185 |  | inflammatory      | 0.000 | 0.066 | 27.047 |
| 18    |   |   |   |   |        |        |       |       |  | protein 1b levels |       |       |        |
| rs116 |   |   |   |   |        |        |       |       |  | Macrophage        |       |       |        |
| 1808  | A | G | A | G | 0.430  | 0.008  | 0.066 | 0.877 |  | inflammatory      | 0.000 | 0.081 | 28.240 |
| 34    |   |   |   |   |        |        |       |       |  | protein 1b levels |       |       |        |
| rs116 |   |   |   |   |        |        |       |       |  | Macrophage        |       |       |        |
| 7432  | C | T | C | T | 0.472  | 0.040  | 0.043 | 0.323 |  | inflammatory      | 0.000 | 0.055 | 74.686 |
| 28    |   |   |   |   |        |        |       |       |  | protein 1b levels |       |       |        |
| rs125 |   |   |   |   |        |        |       |       |  | Macrophage        |       |       |        |
| 3240  | A | G | A | G | 0.245  | 0.072  | 0.035 | 0.038 |  | inflammatory      | 0.000 | 0.049 | 24.910 |
| 8     |   |   |   |   |        |        |       |       |  | protein 1b levels |       |       |        |
| rs147 |   |   |   |   |        |        |       |       |  | Macrophage        |       |       |        |
| 8390  | G | A | G | A | 0.327  | 0.058  | 0.041 | 0.163 |  | inflammatory      | 0.000 | 0.053 | 37.633 |
| 99    |   |   |   |   |        |        |       |       |  | protein 1b levels |       |       |        |
| rs191 |   |   |   |   |        |        |       |       |  | Macrophage        |       |       |        |
| 0413  | T | C | T | C | 0.651  | 0.090  | 0.083 | 0.276 |  | inflammatory      | 0.000 | 0.068 | 91.635 |
| 65    |   |   |   |   |        |        |       |       |  | protein 1b levels |       |       |        |
| rs209 |   |   |   |   |        |        |       |       |  | Macrophage        |       |       |        |
| 9700  | A | G | A | G | 0.180  | -0.004 | 0.027 | 0.888 |  | inflammatory      | 0.000 | 0.039 | 21.283 |
|       |   |   |   |   |        |        |       |       |  | protein 1b levels |       |       |        |
| rs472 |   |   |   |   |        |        |       |       |  | Macrophage        |       |       |        |
| 6575  | G | T | G | T | 0.167  | 0.004  | 0.016 | 0.796 |  | inflammatory      | 0.000 | 0.026 | 42.174 |
|       |   |   |   |   |        |        |       |       |  | protein 1b levels |       |       |        |
| rs645 |   |   |   |   |        |        |       |       |  | Macrophage        |       |       |        |
| 3912  | T | C | T | C | 0.123  | -0.001 | 0.017 | 0.926 |  | inflammatory      | 0.000 | 0.025 | 24.178 |

|                    |   |   |   |   |        |        |       |       |                                                 |       |       |        |
|--------------------|---|---|---|---|--------|--------|-------|-------|-------------------------------------------------|-------|-------|--------|
| rs650<br>1457      | T | C | T | C | -0.126 | -0.007 | 0.018 | 0.716 | protein 1b levels<br>Macrophage<br>inflammatory | 0.000 | 0.027 | 21.665 |
| rs657<br>6081      | C | T | C | T | 0.130  | 0.012  | 0.017 | 0.463 | protein 1b levels<br>Macrophage<br>inflammatory | 0.000 | 0.026 | 25.409 |
| rs728<br>1583<br>0 | A | G | A | G | 0.293  | 0.089  | 0.049 | 0.061 | protein 1b levels<br>Macrophage<br>inflammatory | 0.000 | 0.060 | 23.542 |
| rs927<br>1367      | A | G | A | G | 0.126  | -0.008 | 0.016 | 0.597 | protein 1b levels<br>Macrophage<br>inflammatory | 0.000 | 0.025 | 25.069 |
| rs963<br>5812      | A | G | A | G | -0.133 | 0.011  | 0.017 | 0.536 | protein 1b levels<br>Macrophage<br>inflammatory | 0.000 | 0.028 | 22.732 |
| rs984<br>2794      | T | G | T | G | 0.116  | 0.000  | 0.016 | 0.977 | protein 1b levels<br>Macrophage<br>inflammatory | 0.000 | 0.025 | 21.947 |
| rs100<br>3543<br>2 | A | G | A | G | 0.192  | 0.065  | 0.036 | 0.068 | protein 1b levels<br>Macrophage<br>inflammatory | 0.000 | 0.035 | 30.568 |
| rs107<br>5549<br>0 | G | A | G | A | 0.113  | 0.056  | 0.025 | 0.022 | protein 1a levels<br>Macrophage<br>inflammatory | 0.000 | 0.025 | 20.983 |
| rs108              | T | C | T | C | 0.143  | -0.047 | 0.030 | 0.115 | protein 1a levels<br>Macrophage                 | 0.000 | 0.031 | 20.856 |

|       |   |   |   |   |        |        |       |       |  |                   |       |       |        |
|-------|---|---|---|---|--------|--------|-------|-------|--|-------------------|-------|-------|--------|
| 4750  |   |   |   |   |        |        |       |       |  | inflammatory      |       |       |        |
| 6     |   |   |   |   |        |        |       |       |  | protein 1a levels |       |       |        |
| rs114 |   |   |   |   |        |        |       |       |  | Macrophage        |       |       |        |
| 4348  | G | T | G | T | 0.320  | 0.003  | 0.071 | 0.969 |  | inflammatory      | 0.000 | 0.070 | 21.218 |
| 04    |   |   |   |   |        |        |       |       |  | protein 1a levels |       |       |        |
| rs115 |   |   |   |   |        |        |       |       |  | Macrophage        |       |       |        |
| 3438  | G | A | G | A | 0.509  | 0.071  | 0.113 | 0.525 |  | inflammatory      | 0.000 | 0.077 | 43.169 |
| 10    |   |   |   |   |        |        |       |       |  | protein 1a levels |       |       |        |
| rs115 |   |   |   |   |        |        |       |       |  | Macrophage        |       |       |        |
| 4284  | T | C | T | C | -0.341 | -0.133 | 0.070 | 0.055 |  | inflammatory      | 0.000 | 0.066 | 27.047 |
| 18    |   |   |   |   |        |        |       |       |  | protein 1a levels |       |       |        |
| rs116 |   |   |   |   |        |        |       |       |  | Macrophage        |       |       |        |
| 1808  | A | G | A | G | 0.430  | -0.003 | 0.098 | 0.994 |  | inflammatory      | 0.000 | 0.081 | 28.240 |
| 34    |   |   |   |   |        |        |       |       |  | protein 1a levels |       |       |        |
| rs116 |   |   |   |   |        |        |       |       |  | Macrophage        |       |       |        |
| 7432  | C | T | C | T | 0.472  | 0.007  | 0.063 | 0.929 |  | inflammatory      | 0.000 | 0.055 | 74.686 |
| 28    |   |   |   |   |        |        |       |       |  | protein 1a levels |       |       |        |
| rs125 |   |   |   |   |        |        |       |       |  | Macrophage        |       |       |        |
| 3240  | A | G | A | G | 0.245  | 0.000  | 0.054 | 0.990 |  | inflammatory      | 0.000 | 0.049 | 24.910 |
| 8     |   |   |   |   |        |        |       |       |  | protein 1a levels |       |       |        |
| rs147 |   |   |   |   |        |        |       |       |  | Macrophage        |       |       |        |
| 8390  | G | A | G | A | 0.327  | 0.088  | 0.061 | 0.153 |  | inflammatory      | 0.000 | 0.053 | 37.633 |
| 99    |   |   |   |   |        |        |       |       |  | protein 1a levels |       |       |        |
| rs180 |   |   |   |   |        |        |       |       |  | Macrophage        |       |       |        |
| 8413  | T | G | T | G | 0.363  | -0.023 | 0.077 | 0.693 |  | inflammatory      | 0.000 | 0.076 | 22.971 |
| 91    |   |   |   |   |        |        |       |       |  | protein 1a levels |       |       |        |

|                    |   |   |   |   |        |        |       |       |                                                 |       |       |        |
|--------------------|---|---|---|---|--------|--------|-------|-------|-------------------------------------------------|-------|-------|--------|
| rs209<br>9700      | A | G | A | G | 0.180  | 0.014  | 0.041 | 0.728 | Macrophage<br>inflammatory<br>protein 1a levels | 0.000 | 0.039 | 21.283 |
| rs472<br>6575      | G | T | G | T | 0.167  | 0.015  | 0.025 | 0.544 | Macrophage<br>inflammatory<br>protein 1a levels | 0.000 | 0.026 | 42.174 |
| rs645<br>3912      | T | C | T | C | 0.123  | -0.020 | 0.026 | 0.448 | Macrophage<br>inflammatory<br>protein 1a levels | 0.000 | 0.025 | 24.178 |
| rs650<br>1457      | T | C | T | C | -0.126 | -0.003 | 0.028 | 0.919 | Macrophage<br>inflammatory<br>protein 1a levels | 0.000 | 0.027 | 21.665 |
| rs657<br>6081      | C | T | C | T | 0.130  | 0.000  | 0.026 | 0.999 | Macrophage<br>inflammatory<br>protein 1a levels | 0.000 | 0.026 | 25.409 |
| rs728<br>1583<br>0 | A | G | A | G | 0.293  | 0.101  | 0.080 | 0.208 | Macrophage<br>inflammatory<br>protein 1a levels | 0.000 | 0.060 | 23.542 |
| rs927<br>1367      | A | G | A | G | 0.126  | -0.026 | 0.024 | 0.285 | Macrophage<br>inflammatory<br>protein 1a levels | 0.000 | 0.025 | 25.069 |
| rs963<br>5812      | A | G | A | G | -0.133 | -0.019 | 0.026 | 0.470 | Macrophage<br>inflammatory<br>protein 1a levels | 0.000 | 0.028 | 22.732 |
| rs984<br>2794      | T | G | T | G | 0.116  | 0.009  | 0.024 | 0.713 | Macrophage<br>inflammatory                      | 0.000 | 0.025 | 21.947 |

|       |   |   |   |   |        |        |       |       |  |                   |       |       |        |
|-------|---|---|---|---|--------|--------|-------|-------|--|-------------------|-------|-------|--------|
| rs100 |   |   |   |   |        |        |       |       |  | protein 1a levels |       |       |        |
| 3543  | A | G | A | G | 0.192  | 0.021  | 0.035 | 0.548 |  | Monokine induced  |       |       |        |
| 2     |   |   |   |   |        |        |       |       |  | by gamma          | 0.000 | 0.035 | 30.568 |
| rs107 |   |   |   |   |        |        |       |       |  | interferon levels |       |       |        |
| 5549  | G | A | G | A | 0.113  | 0.020  | 0.024 | 0.396 |  | Monokine induced  |       |       |        |
| 0     |   |   |   |   |        |        |       |       |  | by gamma          | 0.000 | 0.025 | 20.983 |
| rs108 |   |   |   |   |        |        |       |       |  | interferon levels |       |       |        |
| 4750  | T | C | T | C | 0.143  | -0.022 | 0.029 | 0.451 |  | Monokine induced  |       |       |        |
| 6     |   |   |   |   |        |        |       |       |  | by gamma          | 0.000 | 0.031 | 20.856 |
| rs114 |   |   |   |   |        |        |       |       |  | interferon levels |       |       |        |
| 4348  | G | T | G | T | 0.320  | 0.086  | 0.069 | 0.213 |  | Monokine induced  |       |       |        |
| 04    |   |   |   |   |        |        |       |       |  | by gamma          | 0.000 | 0.070 | 21.218 |
| rs115 |   |   |   |   |        |        |       |       |  | interferon levels |       |       |        |
| 3438  | G | A | G | A | 0.509  | 0.324  | 0.113 | 0.004 |  | Monokine induced  |       |       |        |
| 10    |   |   |   |   |        |        |       |       |  | by gamma          | 0.000 | 0.077 | 43.169 |
| rs115 |   |   |   |   |        |        |       |       |  | interferon levels |       |       |        |
| 4284  | T | C | T | C | -0.341 | -0.060 | 0.069 | 0.399 |  | Monokine induced  |       |       |        |
| 18    |   |   |   |   |        |        |       |       |  | by gamma          | 0.000 | 0.066 | 27.047 |
| rs116 |   |   |   |   |        |        |       |       |  | interferon levels |       |       |        |
| 1808  | A | G | A | G | 0.430  | -0.004 | 0.098 | 0.985 |  | Monokine induced  |       |       |        |
| 34    |   |   |   |   |        |        |       |       |  | by gamma          | 0.000 | 0.081 | 28.240 |
| rs116 |   |   |   |   |        |        |       |       |  | interferon levels |       |       |        |
| 7432  | C | T | C | T | 0.472  | 0.014  | 0.063 | 0.849 |  | Monokine induced  |       |       |        |
| 28    |   |   |   |   |        |        |       |       |  | by gamma          | 0.000 | 0.055 | 74.686 |
| rs125 | A | G | A | G | 0.245  | 0.002  | 0.051 | 0.955 |  | interferon levels |       |       |        |
|       |   |   |   |   |        |        |       |       |  | Monokine induced  | 0.000 | 0.049 | 24.910 |

|       |   |   |   |   |        |        |       |       |  |                   |       |       |        |
|-------|---|---|---|---|--------|--------|-------|-------|--|-------------------|-------|-------|--------|
| 3240  |   |   |   |   |        |        |       |       |  | by gamma          |       |       |        |
| 8     |   |   |   |   |        |        |       |       |  | interferon levels |       |       |        |
| rs147 |   |   |   |   |        |        |       |       |  | Monokine induced  |       |       |        |
| 8390  | G | A | G | A | 0.327  | 0.004  | 0.062 | 0.952 |  | by gamma          | 0.000 | 0.053 | 37.633 |
| 99    |   |   |   |   |        |        |       |       |  | interferon levels |       |       |        |
| rs180 |   |   |   |   |        |        |       |       |  | Monokine induced  |       |       |        |
| 8413  | T | G | T | G | 0.363  | 0.008  | 0.075 | 0.939 |  | by gamma          | 0.000 | 0.076 | 22.971 |
| 91    |   |   |   |   |        |        |       |       |  | interferon levels |       |       |        |
| rs209 |   |   |   |   |        |        |       |       |  | Monokine induced  |       |       |        |
| 9700  | A | G | A | G | 0.180  | 0.070  | 0.040 | 0.083 |  | by gamma          | 0.000 | 0.039 | 21.283 |
|       |   |   |   |   |        |        |       |       |  | interferon levels |       |       |        |
| rs472 |   |   |   |   |        |        |       |       |  | Monokine induced  |       |       |        |
| 6575  | G | T | G | T | 0.167  | 0.020  | 0.024 | 0.400 |  | by gamma          | 0.000 | 0.026 | 42.174 |
|       |   |   |   |   |        |        |       |       |  | interferon levels |       |       |        |
| rs645 |   |   |   |   |        |        |       |       |  | Monokine induced  |       |       |        |
| 3912  | T | C | T | C | 0.123  | -0.012 | 0.026 | 0.637 |  | by gamma          | 0.000 | 0.025 | 24.178 |
|       |   |   |   |   |        |        |       |       |  | interferon levels |       |       |        |
| rs650 |   |   |   |   |        |        |       |       |  | Monokine induced  |       |       |        |
| 1457  | T | C | T | C | -0.126 | -0.008 | 0.027 | 0.763 |  | by gamma          | 0.000 | 0.027 | 21.665 |
|       |   |   |   |   |        |        |       |       |  | interferon levels |       |       |        |
| rs657 |   |   |   |   |        |        |       |       |  | Monokine induced  |       |       |        |
| 6081  | C | T | C | T | 0.130  | -0.036 | 0.025 | 0.153 |  | by gamma          | 0.000 | 0.026 | 25.409 |
|       |   |   |   |   |        |        |       |       |  | interferon levels |       |       |        |
| rs728 |   |   |   |   |        |        |       |       |  | Monokine induced  |       |       |        |
| 1583  | A | G | A | G | 0.293  | 0.113  | 0.078 | 0.147 |  | by gamma          | 0.000 | 0.060 | 23.542 |
| 0     |   |   |   |   |        |        |       |       |  | interferon levels |       |       |        |

|                     |   |   |   |   |        |        |       |       |                                                   |       |       |        |
|---------------------|---|---|---|---|--------|--------|-------|-------|---------------------------------------------------|-------|-------|--------|
| rs927<br>1367       | A | G | A | G | 0.126  | 0.019  | 0.024 | 0.425 | Monokine induced<br>by gamma<br>interferon levels | 0.000 | 0.025 | 25.069 |
| rs963<br>5812       | A | G | A | G | -0.133 | -0.013 | 0.026 | 0.619 | Monokine induced<br>by gamma<br>interferon levels | 0.000 | 0.028 | 22.732 |
| rs984<br>2794       | T | G | T | G | 0.116  | 0.030  | 0.023 | 0.196 | Monokine induced<br>by gamma<br>interferon levels | 0.000 | 0.025 | 21.947 |
| rs100<br>3543<br>2  | A | G | A | G | 0.192  | 0.038  | 0.042 | 0.367 | Macrophage<br>colony stimulating<br>factor levels | 0.000 | 0.035 | 30.568 |
| rs107<br>5549<br>0  | G | A | G | A | 0.113  | 0.018  | 0.029 | 0.529 | Macrophage<br>colony stimulating<br>factor levels | 0.000 | 0.025 | 20.983 |
| rs108<br>4750<br>6  | T | C | T | C | 0.143  | 0.070  | 0.036 | 0.054 | Macrophage<br>colony stimulating<br>factor levels | 0.000 | 0.031 | 20.856 |
| rs114<br>4348<br>04 | G | T | G | T | 0.320  | 0.102  | 0.084 | 0.229 | Macrophage<br>colony stimulating<br>factor levels | 0.000 | 0.070 | 21.218 |
| rs115<br>3438<br>10 | G | A | G | A | 0.509  | 0.157  | 0.133 | 0.236 | Macrophage<br>colony stimulating<br>factor levels | 0.000 | 0.077 | 43.169 |
| rs115<br>4284       | T | C | T | C | -0.341 | -0.067 | 0.088 | 0.448 | Macrophage<br>colony stimulating                  | 0.000 | 0.066 | 27.047 |

|       |   |   |   |   |        |        |       |       |                    |               |       |        |  |
|-------|---|---|---|---|--------|--------|-------|-------|--------------------|---------------|-------|--------|--|
| 18    |   |   |   |   |        |        |       |       |                    | factor levels |       |        |  |
| rs116 |   |   |   |   |        |        |       |       |                    | Macrophage    |       |        |  |
| 1808  | A | G | A | G | 0.430  | 0.060  | 0.112 | 0.577 | colony stimulating | 0.000         | 0.081 | 28.240 |  |
| 34    |   |   |   |   |        |        |       |       |                    | factor levels |       |        |  |
| rs116 |   |   |   |   |        |        |       |       |                    | Macrophage    |       |        |  |
| 7432  | C | T | C | T | 0.472  | 0.075  | 0.077 | 0.340 | colony stimulating | 0.000         | 0.055 | 74.686 |  |
| 28    |   |   |   |   |        |        |       |       |                    | factor levels |       |        |  |
| rs125 |   |   |   |   |        |        |       |       |                    | Macrophage    |       |        |  |
| 3240  | A | G | A | G | 0.245  | -0.003 | 0.064 | 0.963 | colony stimulating | 0.000         | 0.049 | 24.910 |  |
| 8     |   |   |   |   |        |        |       |       |                    | factor levels |       |        |  |
| rs147 |   |   |   |   |        |        |       |       |                    | Macrophage    |       |        |  |
| 8390  | G | A | G | A | 0.327  | 0.060  | 0.074 | 0.422 | colony stimulating | 0.000         | 0.053 | 37.633 |  |
| 99    |   |   |   |   |        |        |       |       |                    | factor levels |       |        |  |
| rs180 |   |   |   |   |        |        |       |       |                    | Macrophage    |       |        |  |
| 8413  | T | G | T | G | 0.363  | -0.128 | 0.093 | 0.166 | colony stimulating | 0.000         | 0.076 | 22.971 |  |
| 91    |   |   |   |   |        |        |       |       |                    | factor levels |       |        |  |
| rs209 |   |   |   |   |        |        |       |       |                    | Macrophage    |       |        |  |
| 9700  | A | G | A | G | 0.180  | -0.033 | 0.049 | 0.494 | colony stimulating | 0.000         | 0.039 | 21.283 |  |
|       |   |   |   |   |        |        |       |       |                    | factor levels |       |        |  |
| rs472 |   |   |   |   |        |        |       |       |                    | Macrophage    |       |        |  |
| 6575  | G | T | G | T | 0.167  | 0.020  | 0.030 | 0.501 | colony stimulating | 0.000         | 0.026 | 42.174 |  |
|       |   |   |   |   |        |        |       |       |                    | factor levels |       |        |  |
| rs645 |   |   |   |   |        |        |       |       |                    | Macrophage    |       |        |  |
| 3912  | T | C | T | C | 0.123  | -0.031 | 0.031 | 0.331 | colony stimulating | 0.000         | 0.025 | 24.178 |  |
|       |   |   |   |   |        |        |       |       |                    | factor levels |       |        |  |
| rs650 | T | C | T | C | -0.126 | 0.043  | 0.033 | 0.196 | Macrophage         | 0.000         | 0.027 | 21.665 |  |



|            |   |   |   |   |        |        |       |       |  |                                             |       |       |        |
|------------|---|---|---|---|--------|--------|-------|-------|--|---------------------------------------------|-------|-------|--------|
| 1457       |   |   |   |   |        |        |       |       |  | colony stimulating factor levels            |       |       |        |
| rs6576081  | C | T | C | T | 0.130  | 0.036  | 0.031 | 0.240 |  | Macrophage colony stimulating factor levels | 0.000 | 0.026 | 25.409 |
| rs72815830 | A | G | A | G | 0.293  | -0.028 | 0.093 | 0.753 |  | Macrophage colony stimulating factor levels | 0.000 | 0.060 | 23.542 |
| rs9271367  | A | G | A | G | 0.126  | 0.009  | 0.029 | 0.748 |  | Macrophage colony stimulating factor levels | 0.000 | 0.025 | 25.069 |
| rs9635812  | A | G | A | G | -0.133 | 0.016  | 0.032 | 0.610 |  | Macrophage colony stimulating factor levels | 0.000 | 0.028 | 22.732 |
| rs9842794  | T | G | T | G | 0.116  | -0.006 | 0.029 | 0.849 |  | Macrophage colony stimulating factor levels | 0.000 | 0.025 | 21.947 |
| rs10035432 | A | G | A | G | 0.192  | 0.023  | 0.064 | 0.727 |  | Monocyte chemoattractant protein-3 levels   | 0.000 | 0.035 | 30.568 |
| rs10755490 | G | A | G | A | 0.113  | -0.016 | 0.044 | 0.719 |  | Monocyte chemoattractant protein-3 levels   | 0.000 | 0.025 | 20.983 |
| rs10847506 | T | C | T | C | 0.143  | -0.048 | 0.054 | 0.414 |  | Monocyte chemoattractant protein-3 levels   | 0.000 | 0.031 | 20.856 |

|       |   |   |   |   |        |        |       |       |       |                  |       |       |        |
|-------|---|---|---|---|--------|--------|-------|-------|-------|------------------|-------|-------|--------|
| rs114 |   |   |   |   |        |        |       |       |       | Monocyte         |       |       |        |
| 4348  | G | T | G | T | 0.320  | 0.061  | 0.126 | 0.619 | 0.000 | chemoattractant  | 0.000 | 0.070 | 21.218 |
| 04    |   |   |   |   |        |        |       |       |       | protein-3 levels |       |       |        |
| rs115 |   |   |   |   |        |        |       |       |       | Monocyte         |       |       |        |
| 4284  | T | C | T | C | -0.341 | 0.256  | 0.128 | 0.048 | 0.000 | chemoattractant  | 0.000 | 0.066 | 27.047 |
| 18    |   |   |   |   |        |        |       |       |       | protein-3 levels |       |       |        |
| rs116 |   |   |   |   |        |        |       |       |       | Monocyte         |       |       |        |
| 7432  | C | T | C | T | 0.472  | 0.022  | 0.119 | 0.869 | 0.000 | chemoattractant  | 0.000 | 0.055 | 74.686 |
| 28    |   |   |   |   |        |        |       |       |       | protein-3 levels |       |       |        |
| rs125 |   |   |   |   |        |        |       |       |       | Monocyte         |       |       |        |
| 3240  | A | G | A | G | 0.245  | -0.056 | 0.095 | 0.553 | 0.000 | chemoattractant  | 0.000 | 0.049 | 24.910 |
| 8     |   |   |   |   |        |        |       |       |       | protein-3 levels |       |       |        |
| rs147 |   |   |   |   |        |        |       |       |       | Monocyte         |       |       |        |
| 8390  | G | A | G | A | 0.327  | 0.131  | 0.113 | 0.235 | 0.000 | chemoattractant  | 0.000 | 0.053 | 37.633 |
| 99    |   |   |   |   |        |        |       |       |       | protein-3 levels |       |       |        |
| rs180 |   |   |   |   |        |        |       |       |       | Monocyte         |       |       |        |
| 8413  | T | G | T | G | 0.363  | -0.147 | 0.136 | 0.288 | 0.000 | chemoattractant  | 0.000 | 0.076 | 22.971 |
| 91    |   |   |   |   |        |        |       |       |       | protein-3 levels |       |       |        |
| rs209 |   |   |   |   |        |        |       |       |       | Monocyte         |       |       |        |
| 9700  | A | G | A | G | 0.180  | 0.041  | 0.076 | 0.594 | 0.000 | chemoattractant  | 0.000 | 0.039 | 21.283 |
|       |   |   |   |   |        |        |       |       |       | protein-3 levels |       |       |        |
| rs472 |   |   |   |   |        |        |       |       |       | Monocyte         |       |       |        |
| 6575  | G | T | G | T | 0.167  | -0.060 | 0.045 | 0.183 | 0.000 | chemoattractant  | 0.000 | 0.026 | 42.174 |
|       |   |   |   |   |        |        |       |       |       | protein-3 levels |       |       |        |
| rs645 |   |   |   |   |        |        |       |       |       | Monocyte         |       |       |        |
| 3912  | T | C | T | C | 0.123  | -0.054 | 0.048 | 0.252 | 0.000 | chemoattractant  | 0.000 | 0.025 | 24.178 |

|       |   |   |   |   |        |        |       |       |  |                  |       |       |        |
|-------|---|---|---|---|--------|--------|-------|-------|--|------------------|-------|-------|--------|
| rs650 |   |   |   |   |        |        |       |       |  | protein-3 levels |       |       |        |
| 1457  | T | C | T | C | -0.126 | -0.018 | 0.049 | 0.726 |  | Monocyte         |       |       |        |
|       |   |   |   |   |        |        |       |       |  | chemoattractant  | 0.000 | 0.027 | 21.665 |
|       |   |   |   |   |        |        |       |       |  | protein-3 levels |       |       |        |
| rs657 |   |   |   |   |        |        |       |       |  | Monocyte         |       |       |        |
| 6081  | C | T | C | T | 0.130  | 0.013  | 0.047 | 0.780 |  | chemoattractant  | 0.000 | 0.026 | 25.409 |
|       |   |   |   |   |        |        |       |       |  | protein-3 levels |       |       |        |
| rs728 |   |   |   |   |        |        |       |       |  | Monocyte         |       |       |        |
| 1583  | A | G | A | G | 0.293  | 0.173  | 0.133 | 0.199 |  | chemoattractant  | 0.000 | 0.060 | 23.542 |
| 0     |   |   |   |   |        |        |       |       |  | protein-3 levels |       |       |        |
|       |   |   |   |   |        |        |       |       |  | Monocyte         |       |       |        |
| rs927 |   |   |   |   |        |        |       |       |  | chemoattractant  | 0.000 | 0.025 | 25.069 |
| 1367  | A | G | A | G | 0.126  | 0.039  | 0.043 | 0.376 |  | protein-3 levels |       |       |        |
|       |   |   |   |   |        |        |       |       |  | Monocyte         |       |       |        |
| rs963 |   |   |   |   |        |        |       |       |  | chemoattractant  | 0.000 | 0.028 | 22.732 |
| 5812  | A | G | A | G | -0.133 | 0.044  | 0.048 | 0.372 |  | protein-3 levels |       |       |        |
|       |   |   |   |   |        |        |       |       |  | Monocyte         |       |       |        |
| rs984 |   |   |   |   |        |        |       |       |  | chemoattractant  | 0.000 | 0.025 | 21.947 |
| 2794  | T | G | T | G | 0.116  | 0.011  | 0.044 | 0.811 |  | protein-3 levels |       |       |        |
|       |   |   |   |   |        |        |       |       |  | Monocyte         |       |       |        |
| rs100 |   |   |   |   |        |        |       |       |  | chemoattractant  | 0.000 | 0.035 | 30.568 |
| 3543  | A | G | A | G | 0.192  | -0.037 | 0.024 | 0.114 |  | protein-1 levels |       |       |        |
| 2     |   |   |   |   |        |        |       |       |  | Monocyte         |       |       |        |
| rs107 |   |   |   |   |        |        |       |       |  | chemoattractant  | 0.000 | 0.025 | 20.983 |
| 5549  | G | A | G | A | 0.113  | -0.003 | 0.016 | 0.828 |  | protein-1 levels |       |       |        |
| 0     |   |   |   |   |        |        |       |       |  | Monocyte         |       |       |        |
| rs108 |   |   |   |   |        |        |       |       |  | chemoattractant  | 0.000 | 0.031 | 20.856 |
|       | T | C | T | C | 0.143  | 0.037  | 0.020 | 0.060 |  | protein-1 levels |       |       |        |
|       |   |   |   |   |        |        |       |       |  | Monocyte         |       |       |        |

|       |   |   |   |   |        |        |       |       |  |                  |       |       |        |
|-------|---|---|---|---|--------|--------|-------|-------|--|------------------|-------|-------|--------|
| 4750  |   |   |   |   |        |        |       |       |  | chemoattractant  |       |       |        |
| 6     |   |   |   |   |        |        |       |       |  | protein-1 levels |       |       |        |
| rs114 |   |   |   |   |        |        |       |       |  | Monocyte         |       |       |        |
| 4348  | G | T | G | T | 0.320  | -0.029 | 0.046 | 0.533 |  | chemoattractant  | 0.000 | 0.070 | 21.218 |
| 04    |   |   |   |   |        |        |       |       |  | protein-1 levels |       |       |        |
| rs115 |   |   |   |   |        |        |       |       |  | Monocyte         |       |       |        |
| 3438  | G | A | G | A | 0.509  | 0.110  | 0.076 | 0.156 |  | chemoattractant  | 0.000 | 0.077 | 43.169 |
| 10    |   |   |   |   |        |        |       |       |  | protein-1 levels |       |       |        |
| rs115 |   |   |   |   |        |        |       |       |  | Monocyte         |       |       |        |
| 4284  | T | C | T | C | -0.341 | 0.053  | 0.046 | 0.215 |  | chemoattractant  | 0.000 | 0.066 | 27.047 |
| 18    |   |   |   |   |        |        |       |       |  | protein-1 levels |       |       |        |
| rs116 |   |   |   |   |        |        |       |       |  | Monocyte         |       |       |        |
| 1808  | A | G | A | G | 0.430  | 0.105  | 0.065 | 0.107 |  | chemoattractant  | 0.000 | 0.081 | 28.240 |
| 34    |   |   |   |   |        |        |       |       |  | protein-1 levels |       |       |        |
| rs116 |   |   |   |   |        |        |       |       |  | Monocyte         |       |       |        |
| 7432  | C | T | C | T | 0.472  | 0.011  | 0.044 | 0.784 |  | chemoattractant  | 0.000 | 0.055 | 74.686 |
| 28    |   |   |   |   |        |        |       |       |  | protein-1 levels |       |       |        |
| rs125 |   |   |   |   |        |        |       |       |  | Monocyte         |       |       |        |
| 3240  | A | G | A | G | 0.245  | -0.039 | 0.035 | 0.257 |  | chemoattractant  | 0.000 | 0.049 | 24.910 |
| 8     |   |   |   |   |        |        |       |       |  | protein-1 levels |       |       |        |
| rs147 |   |   |   |   |        |        |       |       |  | Monocyte         |       |       |        |
| 8390  | G | A | G | A | 0.327  | 0.022  | 0.041 | 0.588 |  | chemoattractant  | 0.000 | 0.053 | 37.633 |
| 99    |   |   |   |   |        |        |       |       |  | protein-1 levels |       |       |        |
| rs180 |   |   |   |   |        |        |       |       |  | Monocyte         |       |       |        |
| 8413  | T | G | T | G | 0.363  | -0.026 | 0.051 | 0.603 |  | chemoattractant  | 0.000 | 0.076 | 22.971 |
| 91    |   |   |   |   |        |        |       |       |  | protein-1 levels |       |       |        |

|             |   |   |   |   |        |        |       |       |                                           |       |       |        |
|-------------|---|---|---|---|--------|--------|-------|-------|-------------------------------------------|-------|-------|--------|
| rs191041365 | T | C | T | C | 0.651  | 0.038  | 0.082 | 0.647 | Monocyte chemoattractant protein-1 levels | 0.000 | 0.068 | 91.635 |
| rs2099700   | A | G | A | G | 0.180  | 0.027  | 0.027 | 0.327 | Monocyte chemoattractant protein-1 levels | 0.000 | 0.039 | 21.283 |
| rs4726575   | G | T | G | T | 0.167  | 0.010  | 0.016 | 0.552 | Monocyte chemoattractant protein-1 levels | 0.000 | 0.026 | 42.174 |
| rs6453912   | T | C | T | C | 0.123  | -0.020 | 0.017 | 0.233 | Monocyte chemoattractant protein-1 levels | 0.000 | 0.025 | 24.178 |
| rs6501457   | T | C | T | C | -0.126 | 0.004  | 0.019 | 0.831 | Monocyte chemoattractant protein-1 levels | 0.000 | 0.027 | 21.665 |
| rs6576081   | C | T | C | T | 0.130  | 0.026  | 0.017 | 0.118 | Monocyte chemoattractant protein-1 levels | 0.000 | 0.026 | 25.409 |
| rs72815830  | A | G | A | G | 0.293  | 0.105  | 0.050 | 0.032 | Monocyte chemoattractant protein-1 levels | 0.000 | 0.060 | 23.542 |
| rs9271367   | A | G | A | G | 0.126  | 0.020  | 0.016 | 0.195 | Monocyte chemoattractant protein-1 levels | 0.000 | 0.025 | 25.069 |
| rs9635812   | A | G | A | G | -0.133 | 0.023  | 0.017 | 0.187 | Monocyte chemoattractant                  | 0.000 | 0.028 | 22.732 |

|       |   |   |   |   |        |        |       |       |                                                                     |       |       |        |
|-------|---|---|---|---|--------|--------|-------|-------|---------------------------------------------------------------------|-------|-------|--------|
| rs984 | T | G | T | G | 0.116  | -0.014 | 0.016 | 0.387 | protein-1 levels<br>Monocyte<br>chemoattractant<br>protein-1 levels | 0.000 | 0.025 | 21.947 |
| 2794  |   |   |   |   |        |        |       |       |                                                                     |       |       |        |
| rs100 | A | G | A | G | 0.192  | 0.032  | 0.024 | 0.186 | Interleukin-12p70<br>levels                                         | 0.000 | 0.035 | 30.568 |
| 3543  |   |   |   |   |        |        |       |       |                                                                     |       |       |        |
| 2     |   |   |   |   |        |        |       |       |                                                                     |       |       |        |
| rs107 | G | A | G | A | 0.113  | 0.011  | 0.016 | 0.487 | Interleukin-12p70<br>levels                                         | 0.000 | 0.025 | 20.983 |
| 5549  |   |   |   |   |        |        |       |       |                                                                     |       |       |        |
| 0     |   |   |   |   |        |        |       |       |                                                                     |       |       |        |
| rs114 | G | T | G | T | 0.320  | 0.071  | 0.046 | 0.118 | Interleukin-12p70<br>levels                                         | 0.000 | 0.070 | 21.218 |
| 4348  |   |   |   |   |        |        |       |       |                                                                     |       |       |        |
| 04    |   |   |   |   |        |        |       |       |                                                                     |       |       |        |
| rs115 | G | A | G | A | 0.509  | 0.111  | 0.076 | 0.141 | Interleukin-12p70<br>levels                                         | 0.000 | 0.077 | 43.169 |
| 3438  |   |   |   |   |        |        |       |       |                                                                     |       |       |        |
| 10    |   |   |   |   |        |        |       |       |                                                                     |       |       |        |
| rs115 | T | C | T | C | -0.341 | 0.025  | 0.046 | 0.604 | Interleukin-12p70<br>levels                                         | 0.000 | 0.066 | 27.047 |
| 4284  |   |   |   |   |        |        |       |       |                                                                     |       |       |        |
| 18    |   |   |   |   |        |        |       |       |                                                                     |       |       |        |
| rs116 | A | G | A | G | 0.430  | -0.058 | 0.065 | 0.368 | Interleukin-12p70<br>levels                                         | 0.000 | 0.081 | 28.240 |
| 1808  |   |   |   |   |        |        |       |       |                                                                     |       |       |        |
| 34    |   |   |   |   |        |        |       |       |                                                                     |       |       |        |
| rs116 | C | T | C | T | 0.472  | 0.001  | 0.044 | 0.978 | Interleukin-12p70<br>levels                                         | 0.000 | 0.055 | 74.686 |
| 7432  |   |   |   |   |        |        |       |       |                                                                     |       |       |        |
| 28    |   |   |   |   |        |        |       |       |                                                                     |       |       |        |
| rs125 | A | G | A | G | 0.245  | 0.065  | 0.035 | 0.059 | Interleukin-12p70                                                   | 0.000 | 0.049 | 24.910 |

|       |   |   |   |   |        |        |       |       |                   |        |       |        |  |
|-------|---|---|---|---|--------|--------|-------|-------|-------------------|--------|-------|--------|--|
| 3240  |   |   |   |   |        |        |       |       |                   | levels |       |        |  |
| 8     |   |   |   |   |        |        |       |       |                   |        |       |        |  |
| rs147 |   |   |   |   |        |        |       |       |                   |        |       |        |  |
| 8390  | G | A | G | A | 0.327  | 0.065  | 0.041 | 0.115 | Interleukin-12p70 | 0.000  | 0.053 | 37.633 |  |
| 99    |   |   |   |   |        |        |       |       | levels            |        |       |        |  |
| rs180 |   |   |   |   |        |        |       |       |                   |        |       |        |  |
| 8413  | T | G | T | G | 0.363  | 0.018  | 0.051 | 0.732 | Interleukin-12p70 | 0.000  | 0.076 | 22.971 |  |
| 91    |   |   |   |   |        |        |       |       | levels            |        |       |        |  |
| rs191 |   |   |   |   |        |        |       |       |                   |        |       |        |  |
| 0413  | T | C | T | C | 0.651  | 0.129  | 0.083 | 0.122 | Interleukin-12p70 | 0.000  | 0.068 | 91.635 |  |
| 65    |   |   |   |   |        |        |       |       | levels            |        |       |        |  |
| rs209 |   |   |   |   |        |        |       |       |                   |        |       |        |  |
| 9700  | A | G | A | G | 0.180  | 0.031  | 0.027 | 0.252 | Interleukin-12p70 | 0.000  | 0.039 | 21.283 |  |
|       |   |   |   |   |        |        |       |       | levels            |        |       |        |  |
| rs472 |   |   |   |   |        |        |       |       |                   |        |       |        |  |
| 6575  | G | T | G | T | 0.167  | 0.001  | 0.016 | 0.959 | Interleukin-12p70 | 0.000  | 0.026 | 42.174 |  |
|       |   |   |   |   |        |        |       |       | levels            |        |       |        |  |
| rs645 |   |   |   |   |        |        |       |       |                   |        |       |        |  |
| 3912  | T | C | T | C | 0.123  | -0.016 | 0.017 | 0.352 | Interleukin-12p70 | 0.000  | 0.025 | 24.178 |  |
|       |   |   |   |   |        |        |       |       | levels            |        |       |        |  |
| rs650 |   |   |   |   |        |        |       |       |                   |        |       |        |  |
| 1457  | T | C | T | C | -0.126 | 0.015  | 0.019 | 0.412 | Interleukin-12p70 | 0.000  | 0.027 | 21.665 |  |
|       |   |   |   |   |        |        |       |       | levels            |        |       |        |  |
| rs657 |   |   |   |   |        |        |       |       |                   |        |       |        |  |
| 6081  | C | T | C | T | 0.130  | 0.042  | 0.017 | 0.015 | Interleukin-12p70 | 0.000  | 0.026 | 25.409 |  |
|       |   |   |   |   |        |        |       |       | levels            |        |       |        |  |
| rs728 |   |   |   |   |        |        |       |       |                   |        |       |        |  |
| 1583  | A | G | A | G | 0.293  | 0.053  | 0.049 | 0.251 | Interleukin-12p70 | 0.000  | 0.060 | 23.542 |  |
| 0     |   |   |   |   |        |        |       |       | levels            |        |       |        |  |
| rs927 |   |   |   |   |        |        |       |       |                   |        |       |        |  |
| 1367  | A | G | A | G | 0.126  | 0.004  | 0.016 | 0.804 | Interleukin-12p70 | 0.000  | 0.025 | 25.069 |  |
|       |   |   |   |   |        |        |       |       | levels            |        |       |        |  |

|                     |   |   |   |   |        |        |       |       |                                                  |       |       |        |
|---------------------|---|---|---|---|--------|--------|-------|-------|--------------------------------------------------|-------|-------|--------|
| rs963<br>5812       | A | G | A | G | -0.133 | 0.009  | 0.017 | 0.596 | Interleukin-12p70<br>levels                      | 0.000 | 0.028 | 22.732 |
| rs984<br>2794       | T | G | T | G | 0.116  | 0.012  | 0.016 | 0.450 | Interleukin-12p70<br>levels                      | 0.000 | 0.025 | 21.947 |
| rs100<br>3543<br>2  | A | G | A | G | 0.192  | 0.030  | 0.035 | 0.384 | Interferon<br>gamma-induced<br>protein 10 levels | 0.000 | 0.035 | 30.568 |
| rs107<br>5549<br>0  | G | A | G | A | 0.113  | 0.039  | 0.024 | 0.105 | Interferon<br>gamma-induced<br>protein 10 levels | 0.000 | 0.025 | 20.983 |
| rs108<br>4750<br>6  | T | C | T | C | 0.143  | -0.036 | 0.029 | 0.221 | Interferon<br>gamma-induced<br>protein 10 levels | 0.000 | 0.031 | 20.856 |
| rs114<br>4348<br>04 | G | T | G | T | 0.320  | 0.024  | 0.069 | 0.725 | Interferon<br>gamma-induced<br>protein 10 levels | 0.000 | 0.070 | 21.218 |
| rs115<br>3438<br>10 | G | A | G | A | 0.509  | 0.266  | 0.113 | 0.017 | Interferon<br>gamma-induced<br>protein 10 levels | 0.000 | 0.077 | 43.169 |
| rs115<br>4284<br>18 | T | C | T | C | -0.341 | 0.004  | 0.069 | 0.900 | Interferon<br>gamma-induced<br>protein 10 levels | 0.000 | 0.066 | 27.047 |
| rs116<br>1808<br>34 | A | G | A | G | 0.430  | -0.062 | 0.101 | 0.540 | Interferon<br>gamma-induced<br>protein 10 levels | 0.000 | 0.081 | 28.240 |
| rs116               | C | T | C | T | 0.472  | -0.043 | 0.063 | 0.514 | Interferon                                       | 0.000 | 0.055 | 74.686 |



|       |   |   |   |   |        |        |       |       |  |                   |       |       |        |
|-------|---|---|---|---|--------|--------|-------|-------|--|-------------------|-------|-------|--------|
| 7432  |   |   |   |   |        |        |       |       |  | gamma-induced     |       |       |        |
| 28    |   |   |   |   |        |        |       |       |  | protein 10 levels |       |       |        |
| rs125 |   |   |   |   |        |        |       |       |  | Interferon        |       |       |        |
| 3240  | A | G | A | G | 0.245  | 0.075  | 0.052 | 0.146 |  | gamma-induced     | 0.000 | 0.049 | 24.910 |
| 8     |   |   |   |   |        |        |       |       |  | protein 10 levels |       |       |        |
| rs147 |   |   |   |   |        |        |       |       |  | Interferon        |       |       |        |
| 8390  | G | A | G | A | 0.327  | 0.005  | 0.061 | 0.944 |  | gamma-induced     | 0.000 | 0.053 | 37.633 |
| 99    |   |   |   |   |        |        |       |       |  | protein 10 levels |       |       |        |
| rs180 |   |   |   |   |        |        |       |       |  | Interferon        |       |       |        |
| 8413  | T | G | T | G | 0.363  | 0.012  | 0.074 | 0.867 |  | gamma-induced     | 0.000 | 0.076 | 22.971 |
| 91    |   |   |   |   |        |        |       |       |  | protein 10 levels |       |       |        |
| rs209 |   |   |   |   |        |        |       |       |  | Interferon        |       |       |        |
| 9700  | A | G | A | G | 0.180  | 0.105  | 0.041 | 0.010 |  | gamma-induced     | 0.000 | 0.039 | 21.283 |
|       |   |   |   |   |        |        |       |       |  | protein 10 levels |       |       |        |
| rs472 |   |   |   |   |        |        |       |       |  | Interferon        |       |       |        |
| 6575  | G | T | G | T | 0.167  | -0.004 | 0.024 | 0.880 |  | gamma-induced     | 0.000 | 0.026 | 42.174 |
|       |   |   |   |   |        |        |       |       |  | protein 10 levels |       |       |        |
| rs645 |   |   |   |   |        |        |       |       |  | Interferon        |       |       |        |
| 3912  | T | C | T | C | 0.123  | 0.020  | 0.025 | 0.429 |  | gamma-induced     | 0.000 | 0.025 | 24.178 |
|       |   |   |   |   |        |        |       |       |  | protein 10 levels |       |       |        |
| rs650 |   |   |   |   |        |        |       |       |  | Interferon        |       |       |        |
| 1457  | T | C | T | C | -0.126 | -0.032 | 0.027 | 0.249 |  | gamma-induced     | 0.000 | 0.027 | 21.665 |
|       |   |   |   |   |        |        |       |       |  | protein 10 levels |       |       |        |
| rs657 |   |   |   |   |        |        |       |       |  | Interferon        |       |       |        |
| 6081  | C | T | C | T | 0.130  | -0.073 | 0.025 | 0.004 |  | gamma-induced     | 0.000 | 0.026 | 25.409 |
|       |   |   |   |   |        |        |       |       |  | protein 10 levels |       |       |        |

|        |   |   |   |   |        |        |       |       |       |                |        |  |  |
|--------|---|---|---|---|--------|--------|-------|-------|-------|----------------|--------|--|--|
| rs728  |   |   |   |   |        |        |       |       |       | Interferon     |        |  |  |
| 15830  | A | G | A | G | 0.293  | 0.051  | 0.078 | 0.513 | 0.000 | 0.060          | 23.542 |  |  |
| rs927  |   |   |   |   |        |        |       |       |       | Interferon     |        |  |  |
| 1367   | A | G | A | G | 0.126  | -0.034 | 0.024 | 0.150 | 0.000 | 0.025          | 25.069 |  |  |
| rs963  |   |   |   |   |        |        |       |       |       | Interferon     |        |  |  |
| 5812   | A | G | A | G | -0.133 | -0.015 | 0.026 | 0.578 | 0.000 | 0.028          | 22.732 |  |  |
| rs984  |   |   |   |   |        |        |       |       |       | Interferon     |        |  |  |
| 2794   | T | G | T | G | 0.116  | 0.028  | 0.023 | 0.241 | 0.000 | 0.025          | 21.947 |  |  |
| rs100  |   |   |   |   |        |        |       |       |       | Interleukin-18 |        |  |  |
| 35432  | A | G | A | G | 0.192  | 0.026  | 0.035 | 0.452 | 0.000 | 0.035          | 30.568 |  |  |
| rs107  |   |   |   |   |        |        |       |       |       | Interleukin-18 |        |  |  |
| 55490  | G | A | G | A | 0.113  | 0.065  | 0.024 | 0.007 | 0.000 | 0.025          | 20.983 |  |  |
| rs108  |   |   |   |   |        |        |       |       |       | Interleukin-18 |        |  |  |
| 47506  | T | C | T | C | 0.143  | -0.017 | 0.030 | 0.555 | 0.000 | 0.031          | 20.856 |  |  |
| rs114  |   |   |   |   |        |        |       |       |       | Interleukin-18 |        |  |  |
| 434804 | G | T | G | T | 0.320  | -0.023 | 0.069 | 0.740 | 0.000 | 0.070          | 21.218 |  |  |
| rs115  |   |   |   |   |        |        |       |       |       | Interleukin-18 |        |  |  |
| 3438   | G | A | G | A | 0.509  | 0.088  | 0.112 | 0.418 | 0.000 | 0.077          | 43.169 |  |  |

|       |   |   |   |   |        |        |       |       |                       |       |       |        |  |
|-------|---|---|---|---|--------|--------|-------|-------|-----------------------|-------|-------|--------|--|
| 10    |   |   |   |   |        |        |       |       |                       |       |       |        |  |
| rs115 |   |   |   |   |        |        |       |       |                       |       |       |        |  |
| 4284  | T | C | T | C | -0.341 | 0.048  | 0.069 | 0.491 | Interleukin-18 levels | 0.000 | 0.066 | 27.047 |  |
| 18    |   |   |   |   |        |        |       |       |                       |       |       |        |  |
| rs116 |   |   |   |   |        |        |       |       |                       |       |       |        |  |
| 1808  | A | G | A | G | 0.430  | 0.008  | 0.098 | 0.938 | Interleukin-18 levels | 0.000 | 0.081 | 28.240 |  |
| 34    |   |   |   |   |        |        |       |       |                       |       |       |        |  |
| rs116 |   |   |   |   |        |        |       |       |                       |       |       |        |  |
| 7432  | C | T | C | T | 0.472  | 0.077  | 0.063 | 0.229 | Interleukin-18 levels | 0.000 | 0.055 | 74.686 |  |
| 28    |   |   |   |   |        |        |       |       |                       |       |       |        |  |
| rs125 |   |   |   |   |        |        |       |       |                       |       |       |        |  |
| 3240  | A | G | A | G | 0.245  | 0.019  | 0.052 | 0.707 | Interleukin-18 levels | 0.000 | 0.049 | 24.910 |  |
| 8     |   |   |   |   |        |        |       |       |                       |       |       |        |  |
| rs147 |   |   |   |   |        |        |       |       |                       |       |       |        |  |
| 8390  | G | A | G | A | 0.327  | 0.026  | 0.062 | 0.685 | Interleukin-18 levels | 0.000 | 0.053 | 37.633 |  |
| 99    |   |   |   |   |        |        |       |       |                       |       |       |        |  |
| rs180 |   |   |   |   |        |        |       |       |                       |       |       |        |  |
| 8413  | T | G | T | G | 0.363  | 0.054  | 0.075 | 0.481 | Interleukin-18 levels | 0.000 | 0.076 | 22.971 |  |
| 91    |   |   |   |   |        |        |       |       |                       |       |       |        |  |
| rs209 |   |   |   |   |        |        |       |       |                       |       |       |        |  |
| 9700  | A | G | A | G | 0.180  | -0.046 | 0.041 | 0.257 | Interleukin-18 levels | 0.000 | 0.039 | 21.283 |  |
| rs472 |   |   |   |   |        |        |       |       |                       |       |       |        |  |
| 6575  | G | T | G | T | 0.167  | 0.016  | 0.025 | 0.522 | Interleukin-18 levels | 0.000 | 0.026 | 42.174 |  |
| rs645 |   |   |   |   |        |        |       |       |                       |       |       |        |  |
| 3912  | T | C | T | C | 0.123  | -0.011 | 0.026 | 0.680 | Interleukin-18 levels | 0.000 | 0.025 | 24.178 |  |
| rs650 |   |   |   |   |        |        |       |       |                       |       |       |        |  |
|       | T | C | T | C | -0.126 | -0.016 | 0.027 | 0.568 | Interleukin-18        | 0.000 | 0.027 | 21.665 |  |

|       |   |   |   |   |        |        |       |       |  |                |       |       |        |
|-------|---|---|---|---|--------|--------|-------|-------|--|----------------|-------|-------|--------|
| 1457  |   |   |   |   |        |        |       |       |  | levels         |       |       |        |
| rs657 | C | T | C | T | 0.130  | -0.011 | 0.025 | 0.642 |  | Interleukin-18 | 0.000 | 0.026 | 25.409 |
| 6081  |   |   |   |   |        |        |       |       |  | levels         |       |       |        |
| rs728 | A | G | A | G | 0.293  | 0.149  | 0.077 | 0.051 |  | Interleukin-18 | 0.000 | 0.060 | 23.542 |
| 1583  |   |   |   |   |        |        |       |       |  | levels         |       |       |        |
| 0     |   |   |   |   |        |        |       |       |  |                |       |       |        |
| rs927 | A | G | A | G | 0.126  | 0.016  | 0.024 | 0.509 |  | Interleukin-18 | 0.000 | 0.025 | 25.069 |
| 1367  |   |   |   |   |        |        |       |       |  | levels         |       |       |        |
| rs963 | A | G | A | G | -0.133 | 0.020  | 0.026 | 0.431 |  | Interleukin-18 | 0.000 | 0.028 | 22.732 |
| 5812  |   |   |   |   |        |        |       |       |  | levels         |       |       |        |
| rs984 | T | G | T | G | 0.116  | -0.021 | 0.024 | 0.377 |  | Interleukin-18 | 0.000 | 0.025 | 21.947 |
| 2794  |   |   |   |   |        |        |       |       |  | levels         |       |       |        |
| rs100 | A | G | A | G | 0.192  | 0.014  | 0.025 | 0.601 |  | Interleukin-17 | 0.000 | 0.035 | 30.568 |
| 3543  |   |   |   |   |        |        |       |       |  | levels         |       |       |        |
| 2     |   |   |   |   |        |        |       |       |  |                |       |       |        |
| rs107 | G | A | G | A | 0.113  | 0.020  | 0.017 | 0.236 |  | Interleukin-17 | 0.000 | 0.025 | 20.983 |
| 5549  |   |   |   |   |        |        |       |       |  | levels         |       |       |        |
| 0     |   |   |   |   |        |        |       |       |  |                |       |       |        |
| rs108 | T | C | T | C | 0.143  | 0.006  | 0.020 | 0.779 |  | Interleukin-17 | 0.000 | 0.031 | 20.856 |
| 4750  |   |   |   |   |        |        |       |       |  | levels         |       |       |        |
| 6     |   |   |   |   |        |        |       |       |  |                |       |       |        |
| rs114 | G | T | G | T | 0.320  | 0.001  | 0.047 | 0.969 |  | Interleukin-17 | 0.000 | 0.070 | 21.218 |
| 4348  |   |   |   |   |        |        |       |       |  | levels         |       |       |        |
| 04    |   |   |   |   |        |        |       |       |  |                |       |       |        |
| rs115 | G | A | G | A | 0.509  | 0.118  | 0.079 | 0.129 |  | Interleukin-17 | 0.000 | 0.077 | 43.169 |
| 3438  |   |   |   |   |        |        |       |       |  | levels         |       |       |        |

|                           |   |   |   |   |        |        |       |       |                          |       |       |        |
|---------------------------|---|---|---|---|--------|--------|-------|-------|--------------------------|-------|-------|--------|
| 10<br>rs115<br>4284<br>18 | T | C | T | C | -0.341 | 0.045  | 0.047 | 0.371 | Interleukin-17<br>levels | 0.000 | 0.066 | 27.047 |
| rs116<br>1808<br>34       | A | G | A | G | 0.430  | 0.048  | 0.067 | 0.471 | Interleukin-17<br>levels | 0.000 | 0.081 | 28.240 |
| rs116<br>7432<br>28       | C | T | C | T | 0.472  | -0.001 | 0.045 | 0.978 | Interleukin-17<br>levels | 0.000 | 0.055 | 74.686 |
| rs125<br>3240<br>8        | A | G | A | G | 0.245  | 0.006  | 0.036 | 0.873 | Interleukin-17<br>levels | 0.000 | 0.049 | 24.910 |
| rs147<br>8390<br>99       | G | A | G | A | 0.327  | 0.041  | 0.042 | 0.344 | Interleukin-17<br>levels | 0.000 | 0.053 | 37.633 |
| rs180<br>8413<br>91       | T | G | T | G | 0.363  | -0.022 | 0.052 | 0.633 | Interleukin-17<br>levels | 0.000 | 0.076 | 22.971 |
| rs191<br>0413<br>65       | T | C | T | C | 0.651  | 0.017  | 0.085 | 0.840 | Interleukin-17<br>levels | 0.000 | 0.068 | 91.635 |
| rs209<br>9700             | A | G | A | G | 0.180  | -0.006 | 0.028 | 0.821 | Interleukin-17<br>levels | 0.000 | 0.039 | 21.283 |
| rs472<br>6575             | G | T | G | T | 0.167  | 0.001  | 0.017 | 0.948 | Interleukin-17<br>levels | 0.000 | 0.026 | 42.174 |

|                    |   |   |   |   |        |        |       |       |                          |       |       |        |
|--------------------|---|---|---|---|--------|--------|-------|-------|--------------------------|-------|-------|--------|
| rs645<br>3912      | T | C | T | C | 0.123  | -0.024 | 0.017 | 0.169 | Interleukin-17<br>levels | 0.000 | 0.025 | 24.178 |
| rs650<br>1457      | T | C | T | C | -0.126 | 0.005  | 0.019 | 0.803 | Interleukin-17<br>levels | 0.000 | 0.027 | 21.665 |
| rs657<br>6081      | C | T | C | T | 0.130  | 0.036  | 0.018 | 0.041 | Interleukin-17<br>levels | 0.000 | 0.026 | 25.409 |
| rs728<br>1583<br>0 | A | G | A | G | 0.293  | 0.061  | 0.051 | 0.238 | Interleukin-17<br>levels | 0.000 | 0.060 | 23.542 |
| rs927<br>1367      | A | G | A | G | 0.126  | -0.005 | 0.016 | 0.764 | Interleukin-17<br>levels | 0.000 | 0.025 | 25.069 |
| rs963<br>5812      | A | G | A | G | -0.133 | -0.008 | 0.018 | 0.677 | Interleukin-17<br>levels | 0.000 | 0.028 | 22.732 |
| rs984<br>2794      | T | G | T | G | 0.116  | 0.009  | 0.016 | 0.576 | Interleukin-17<br>levels | 0.000 | 0.025 | 21.947 |
| rs100<br>3543<br>2 | A | G | A | G | 0.192  | 0.085  | 0.035 | 0.017 | Interleukin-13<br>levels | 0.000 | 0.035 | 30.568 |
| rs107<br>5549<br>0 | G | A | G | A | 0.113  | 0.045  | 0.024 | 0.065 | Interleukin-13<br>levels | 0.000 | 0.025 | 20.983 |
| rs108<br>4750<br>6 | T | C | T | C | 0.143  | -0.045 | 0.030 | 0.139 | Interleukin-13<br>levels | 0.000 | 0.031 | 20.856 |
| rs114<br>4348      | G | T | G | T | 0.320  | 0.112  | 0.071 | 0.116 | Interleukin-13<br>levels | 0.000 | 0.070 | 21.218 |

|       |   |   |   |   |        |        |       |       |                       |       |       |        |  |
|-------|---|---|---|---|--------|--------|-------|-------|-----------------------|-------|-------|--------|--|
| 04    |   |   |   |   |        |        |       |       |                       |       |       |        |  |
| rs115 |   |   |   |   |        |        |       |       |                       |       |       |        |  |
| 3438  | G | A | G | A | 0.509  | 0.092  | 0.112 | 0.403 | Interleukin-13 levels | 0.000 | 0.077 | 43.169 |  |
| 10    |   |   |   |   |        |        |       |       |                       |       |       |        |  |
| rs115 |   |   |   |   |        |        |       |       |                       |       |       |        |  |
| 4284  | T | C | T | C | -0.341 | -0.062 | 0.070 | 0.382 | Interleukin-13 levels | 0.000 | 0.066 | 27.047 |  |
| 18    |   |   |   |   |        |        |       |       |                       |       |       |        |  |
| rs116 |   |   |   |   |        |        |       |       |                       |       |       |        |  |
| 1808  | A | G | A | G | 0.430  | 0.036  | 0.097 | 0.696 | Interleukin-13 levels | 0.000 | 0.081 | 28.240 |  |
| 34    |   |   |   |   |        |        |       |       |                       |       |       |        |  |
| rs116 |   |   |   |   |        |        |       |       |                       |       |       |        |  |
| 7432  | C | T | C | T | 0.472  | -0.026 | 0.064 | 0.686 | Interleukin-13 levels | 0.000 | 0.055 | 74.686 |  |
| 28    |   |   |   |   |        |        |       |       |                       |       |       |        |  |
| rs125 |   |   |   |   |        |        |       |       |                       |       |       |        |  |
| 3240  | A | G | A | G | 0.245  | 0.037  | 0.053 | 0.472 | Interleukin-13 levels | 0.000 | 0.049 | 24.910 |  |
| 8     |   |   |   |   |        |        |       |       |                       |       |       |        |  |
| rs147 |   |   |   |   |        |        |       |       |                       |       |       |        |  |
| 8390  | G | A | G | A | 0.327  | 0.125  | 0.062 | 0.044 | Interleukin-13 levels | 0.000 | 0.053 | 37.633 |  |
| 99    |   |   |   |   |        |        |       |       |                       |       |       |        |  |
| rs180 |   |   |   |   |        |        |       |       |                       |       |       |        |  |
| 8413  | T | G | T | G | 0.363  | -0.016 | 0.076 | 0.800 | Interleukin-13 levels | 0.000 | 0.076 | 22.971 |  |
| 91    |   |   |   |   |        |        |       |       |                       |       |       |        |  |
| rs209 |   |   |   |   |        |        |       |       |                       |       |       |        |  |
| 9700  | A | G | A | G | 0.180  | 0.015  | 0.041 | 0.710 | Interleukin-13 levels | 0.000 | 0.039 | 21.283 |  |
| rs472 |   |   |   |   |        |        |       |       |                       |       |       |        |  |
| 6575  | G | T | G | T | 0.167  | -0.001 | 0.025 | 0.985 | Interleukin-13 levels | 0.000 | 0.026 | 42.174 |  |

|                    |   |   |   |   |        |        |       |       |                          |       |       |        |
|--------------------|---|---|---|---|--------|--------|-------|-------|--------------------------|-------|-------|--------|
| rs645<br>3912      | T | C | T | C | 0.123  | -0.007 | 0.026 | 0.797 | Interleukin-13<br>levels | 0.000 | 0.025 | 24.178 |
| rs650<br>1457      | T | C | T | C | -0.126 | 0.015  | 0.028 | 0.591 | Interleukin-13<br>levels | 0.000 | 0.027 | 21.665 |
| rs657<br>6081      | C | T | C | T | 0.130  | 0.028  | 0.026 | 0.274 | Interleukin-13<br>levels | 0.000 | 0.026 | 25.409 |
| rs728<br>1583<br>0 | A | G | A | G | 0.293  | 0.088  | 0.080 | 0.264 | Interleukin-13<br>levels | 0.000 | 0.060 | 23.542 |
| rs927<br>1367      | A | G | A | G | 0.126  | -0.010 | 0.024 | 0.674 | Interleukin-13<br>levels | 0.000 | 0.025 | 25.069 |
| rs963<br>5812      | A | G | A | G | -0.133 | 0.005  | 0.026 | 0.840 | Interleukin-13<br>levels | 0.000 | 0.028 | 22.732 |
| rs984<br>2794      | T | G | T | G | 0.116  | 0.014  | 0.024 | 0.556 | Interleukin-13<br>levels | 0.000 | 0.025 | 21.947 |
| rs100<br>3543<br>2 | A | G | A | G | 0.192  | 0.039  | 0.025 | 0.126 | Interleukin-10<br>levels | 0.000 | 0.035 | 30.568 |
| rs107<br>5549<br>0 | G | A | G | A | 0.113  | 0.006  | 0.017 | 0.736 | Interleukin-10<br>levels | 0.000 | 0.025 | 20.983 |
| rs108<br>4750<br>6 | T | C | T | C | 0.143  | -0.004 | 0.020 | 0.842 | Interleukin-10<br>levels | 0.000 | 0.031 | 20.856 |
| rs114<br>4348      | G | T | G | T | 0.320  | 0.056  | 0.047 | 0.238 | Interleukin-10<br>levels | 0.000 | 0.070 | 21.218 |



|       |   |   |   |   |        |        |       |       |                       |       |       |        |  |
|-------|---|---|---|---|--------|--------|-------|-------|-----------------------|-------|-------|--------|--|
| 04    |   |   |   |   |        |        |       |       |                       |       |       |        |  |
| rs115 |   |   |   |   |        |        |       |       |                       |       |       |        |  |
| 3438  | G | A | G | A | 0.509  | 0.158  | 0.077 | 0.039 | Interleukin-10 levels | 0.000 | 0.077 | 43.169 |  |
| 10    |   |   |   |   |        |        |       |       |                       |       |       |        |  |
| rs115 |   |   |   |   |        |        |       |       |                       |       |       |        |  |
| 4284  | T | C | T | C | -0.341 | 0.036  | 0.047 | 0.460 | Interleukin-10 levels | 0.000 | 0.066 | 27.047 |  |
| 18    |   |   |   |   |        |        |       |       |                       |       |       |        |  |
| rs116 |   |   |   |   |        |        |       |       |                       |       |       |        |  |
| 1808  | A | G | A | G | 0.430  | -0.006 | 0.068 | 0.917 | Interleukin-10 levels | 0.000 | 0.081 | 28.240 |  |
| 34    |   |   |   |   |        |        |       |       |                       |       |       |        |  |
| rs116 |   |   |   |   |        |        |       |       |                       |       |       |        |  |
| 7432  | C | T | C | T | 0.472  | 0.021  | 0.045 | 0.654 | Interleukin-10 levels | 0.000 | 0.055 | 74.686 |  |
| 28    |   |   |   |   |        |        |       |       |                       |       |       |        |  |
| rs125 |   |   |   |   |        |        |       |       |                       |       |       |        |  |
| 3240  | A | G | A | G | 0.245  | 0.047  | 0.036 | 0.190 | Interleukin-10 levels | 0.000 | 0.049 | 24.910 |  |
| 8     |   |   |   |   |        |        |       |       |                       |       |       |        |  |
| rs147 |   |   |   |   |        |        |       |       |                       |       |       |        |  |
| 8390  | G | A | G | A | 0.327  | 0.035  | 0.042 | 0.407 | Interleukin-10 levels | 0.000 | 0.053 | 37.633 |  |
| 99    |   |   |   |   |        |        |       |       |                       |       |       |        |  |
| rs180 |   |   |   |   |        |        |       |       |                       |       |       |        |  |
| 8413  | T | G | T | G | 0.363  | 0.012  | 0.052 | 0.826 | Interleukin-10 levels | 0.000 | 0.076 | 22.971 |  |
| 91    |   |   |   |   |        |        |       |       |                       |       |       |        |  |
| rs191 |   |   |   |   |        |        |       |       |                       |       |       |        |  |
| 0413  | T | C | T | C | 0.651  | 0.072  | 0.086 | 0.401 | Interleukin-10 levels | 0.000 | 0.068 | 91.635 |  |
| 65    |   |   |   |   |        |        |       |       |                       |       |       |        |  |
| rs209 | A | G | A | G | 0.180  | 0.059  | 0.028 | 0.039 | Interleukin-10        | 0.000 | 0.039 | 21.283 |  |

|           |   |   |   |   |        |        |       |       |  |                       |       |       |        |
|-----------|---|---|---|---|--------|--------|-------|-------|--|-----------------------|-------|-------|--------|
| 9700      |   |   |   |   |        |        |       |       |  | levels                |       |       |        |
| rs4726575 | G | T | G | T | 0.167  | -0.006 | 0.017 | 0.730 |  | Interleukin-10 levels | 0.000 | 0.026 | 42.174 |
| rs6453912 | T | C | T | C | 0.123  | 0.005  | 0.018 | 0.767 |  | Interleukin-10 levels | 0.000 | 0.025 | 24.178 |
| rs6501457 | T | C | T | C | -0.126 | 0.007  | 0.019 | 0.704 |  | Interleukin-10 levels | 0.000 | 0.027 | 21.665 |
| rs6576081 | C | T | C | T | 0.130  | 0.020  | 0.018 | 0.258 |  | Interleukin-10 levels | 0.000 | 0.026 | 25.409 |
| rs7281583 | A | G | A | G | 0.293  | 0.026  | 0.051 | 0.540 |  | Interleukin-10 levels | 0.000 | 0.060 | 23.542 |
| rs9271367 | A | G | A | G | 0.126  | -0.015 | 0.016 | 0.356 |  | Interleukin-10 levels | 0.000 | 0.025 | 25.069 |
| rs9635812 | A | G | A | G | -0.133 | -0.002 | 0.018 | 0.906 |  | Interleukin-10 levels | 0.000 | 0.028 | 22.732 |
| rs9842794 | T | G | T | G | 0.116  | 0.014  | 0.016 | 0.370 |  | Interleukin-10 levels | 0.000 | 0.025 | 21.947 |
| rs1003543 | A | G | A | G | 0.192  | 0.021  | 0.036 | 0.556 |  | Interleukin-8 levels  | 0.000 | 0.035 | 30.568 |
| rs1075549 | G | A | G | A | 0.113  | 0.020  | 0.024 | 0.403 |  | Interleukin-8 levels  | 0.000 | 0.025 | 20.983 |
| rs1084750 | T | C | T | C | 0.143  | -0.031 | 0.030 | 0.297 |  | Interleukin-8 levels  | 0.000 | 0.031 | 20.856 |

|       |   |   |   |   |        |        |       |       |               |       |       |        |  |
|-------|---|---|---|---|--------|--------|-------|-------|---------------|-------|-------|--------|--|
| 6     |   |   |   |   |        |        |       |       |               |       |       |        |  |
| rs114 |   |   |   |   |        |        |       |       |               |       |       |        |  |
| 4348  | G | T | G | T | 0.320  | 0.119  | 0.071 | 0.096 | Interleukin-8 | 0.000 | 0.070 | 21.218 |  |
| 04    |   |   |   |   |        |        |       |       |               |       |       |        |  |
| rs115 |   |   |   |   |        |        |       |       |               |       |       |        |  |
| 3438  | G | A | G | A | 0.509  | 0.183  | 0.115 | 0.111 | Interleukin-8 | 0.000 | 0.077 | 43.169 |  |
| 10    |   |   |   |   |        |        |       |       |               |       |       |        |  |
| rs115 |   |   |   |   |        |        |       |       |               |       |       |        |  |
| 4284  | T | C | T | C | -0.341 | 0.031  | 0.069 | 0.659 | Interleukin-8 | 0.000 | 0.066 | 27.047 |  |
| 18    |   |   |   |   |        |        |       |       |               |       |       |        |  |
| rs116 |   |   |   |   |        |        |       |       |               |       |       |        |  |
| 1808  | A | G | A | G | 0.430  | 0.013  | 0.098 | 0.886 | Interleukin-8 | 0.000 | 0.081 | 28.240 |  |
| 34    |   |   |   |   |        |        |       |       |               |       |       |        |  |
| rs116 |   |   |   |   |        |        |       |       |               |       |       |        |  |
| 7432  | C | T | C | T | 0.472  | 0.062  | 0.064 | 0.338 | Interleukin-8 | 0.000 | 0.055 | 74.686 |  |
| 28    |   |   |   |   |        |        |       |       |               |       |       |        |  |
| rs125 |   |   |   |   |        |        |       |       |               |       |       |        |  |
| 3240  | A | G | A | G | 0.245  | -0.028 | 0.053 | 0.609 | Interleukin-8 | 0.000 | 0.049 | 24.910 |  |
| 8     |   |   |   |   |        |        |       |       |               |       |       |        |  |
| rs147 |   |   |   |   |        |        |       |       |               |       |       |        |  |
| 8390  | G | A | G | A | 0.327  | 0.198  | 0.063 | 0.002 | Interleukin-8 | 0.000 | 0.053 | 37.633 |  |
| 99    |   |   |   |   |        |        |       |       |               |       |       |        |  |
| rs180 |   |   |   |   |        |        |       |       |               |       |       |        |  |
| 8413  | T | G | T | G | 0.363  | -0.007 | 0.077 | 0.897 | Interleukin-8 | 0.000 | 0.076 | 22.971 |  |
| 91    |   |   |   |   |        |        |       |       |               |       |       |        |  |
| rs209 | A | G | A | G | 0.180  | 0.037  | 0.042 | 0.375 | Interleukin-8 | 0.000 | 0.039 | 21.283 |  |

|            |   |   |   |   |        |        |       |       |  |                      |       |       |        |
|------------|---|---|---|---|--------|--------|-------|-------|--|----------------------|-------|-------|--------|
| 9700       |   |   |   |   |        |        |       |       |  | levels               |       |       |        |
| rs4726575  | G | T | G | T | 0.167  | 0.029  | 0.025 | 0.243 |  | Interleukin-8 levels | 0.000 | 0.026 | 42.174 |
| rs6453912  | T | C | T | C | 0.123  | -0.028 | 0.026 | 0.284 |  | Interleukin-8 levels | 0.000 | 0.025 | 24.178 |
| rs6501457  | T | C | T | C | -0.126 | -0.049 | 0.028 | 0.082 |  | Interleukin-8 levels | 0.000 | 0.027 | 21.665 |
| rs6576081  | C | T | C | T | 0.130  | 0.013  | 0.026 | 0.617 |  | Interleukin-8 levels | 0.000 | 0.026 | 25.409 |
| rs72815830 | A | G | A | G | 0.293  | 0.113  | 0.080 | 0.164 |  | Interleukin-8 levels | 0.000 | 0.060 | 23.542 |
| rs9271367  | A | G | A | G | 0.126  | -0.021 | 0.024 | 0.381 |  | Interleukin-8 levels | 0.000 | 0.025 | 25.069 |
| rs9635812  | A | G | A | G | -0.133 | -0.014 | 0.026 | 0.599 |  | Interleukin-8 levels | 0.000 | 0.028 | 22.732 |
| rs9842794  | T | G | T | G | 0.116  | -0.002 | 0.024 | 0.941 |  | Interleukin-8 levels | 0.000 | 0.025 | 21.947 |
| rs10035432 | A | G | A | G | 0.192  | -0.023 | 0.024 | 0.324 |  | Interleukin-6 levels | 0.000 | 0.035 | 30.568 |
| rs10755490 | G | A | G | A | 0.113  | 0.008  | 0.016 | 0.644 |  | Interleukin-6 levels | 0.000 | 0.025 | 20.983 |
| rs1084750  | T | C | T | C | 0.143  | -0.020 | 0.020 | 0.336 |  | Interleukin-6 levels | 0.000 | 0.031 | 20.856 |

|       |   |   |   |   |        |       |       |       |                      |       |       |        |  |
|-------|---|---|---|---|--------|-------|-------|-------|----------------------|-------|-------|--------|--|
| 6     |   |   |   |   |        |       |       |       |                      |       |       |        |  |
| rs114 |   |   |   |   |        |       |       |       |                      |       |       |        |  |
| 4348  | G | T | G | T | 0.320  | 0.070 | 0.046 | 0.129 | Interleukin-6 levels | 0.000 | 0.070 | 21.218 |  |
| 04    |   |   |   |   |        |       |       |       |                      |       |       |        |  |
| rs115 |   |   |   |   |        |       |       |       |                      |       |       |        |  |
| 3438  | G | A | G | A | 0.509  | 0.134 | 0.076 | 0.079 | Interleukin-6 levels | 0.000 | 0.077 | 43.169 |  |
| 10    |   |   |   |   |        |       |       |       |                      |       |       |        |  |
| rs115 |   |   |   |   |        |       |       |       |                      |       |       |        |  |
| 4284  | T | C | T | C | -0.341 | 0.026 | 0.046 | 0.584 | Interleukin-6 levels | 0.000 | 0.066 | 27.047 |  |
| 18    |   |   |   |   |        |       |       |       |                      |       |       |        |  |
| rs116 |   |   |   |   |        |       |       |       |                      |       |       |        |  |
| 1808  | A | G | A | G | 0.430  | 0.022 | 0.065 | 0.721 | Interleukin-6 levels | 0.000 | 0.081 | 28.240 |  |
| 34    |   |   |   |   |        |       |       |       |                      |       |       |        |  |
| rs116 |   |   |   |   |        |       |       |       |                      |       |       |        |  |
| 7432  | C | T | C | T | 0.472  | 0.009 | 0.044 | 0.808 | Interleukin-6 levels | 0.000 | 0.055 | 74.686 |  |
| 28    |   |   |   |   |        |       |       |       |                      |       |       |        |  |
| rs125 |   |   |   |   |        |       |       |       |                      |       |       |        |  |
| 3240  | A | G | A | G | 0.245  | 0.040 | 0.035 | 0.249 | Interleukin-6 levels | 0.000 | 0.049 | 24.910 |  |
| 8     |   |   |   |   |        |       |       |       |                      |       |       |        |  |
| rs147 |   |   |   |   |        |       |       |       |                      |       |       |        |  |
| 8390  | G | A | G | A | 0.327  | 0.022 | 0.042 | 0.630 | Interleukin-6 levels | 0.000 | 0.053 | 37.633 |  |
| 99    |   |   |   |   |        |       |       |       |                      |       |       |        |  |
| rs180 |   |   |   |   |        |       |       |       |                      |       |       |        |  |
| 8413  | T | G | T | G | 0.363  | 0.052 | 0.051 | 0.320 | Interleukin-6 levels | 0.000 | 0.076 | 22.971 |  |
| 91    |   |   |   |   |        |       |       |       |                      |       |       |        |  |
| rs209 | A | G | A | G | 0.180  | 0.010 | 0.027 | 0.712 | Interleukin-6        | 0.000 | 0.039 | 21.283 |  |

|           |   |   |   |   |        |        |       |       |  |                                          |       |       |        |
|-----------|---|---|---|---|--------|--------|-------|-------|--|------------------------------------------|-------|-------|--------|
| 9700      |   |   |   |   |        |        |       |       |  | levels                                   |       |       |        |
| rs4726575 | G | T | G | T | 0.167  | 0.001  | 0.016 | 0.933 |  | Interleukin-6 levels                     | 0.000 | 0.026 | 42.174 |
| rs6453912 | T | C | T | C | 0.123  | -0.019 | 0.017 | 0.266 |  | Interleukin-6 levels                     | 0.000 | 0.025 | 24.178 |
| rs6501457 | T | C | T | C | -0.126 | 0.005  | 0.019 | 0.770 |  | Interleukin-6 levels                     | 0.000 | 0.027 | 21.665 |
| rs6576081 | C | T | C | T | 0.130  | 0.012  | 0.017 | 0.476 |  | Interleukin-6 levels                     | 0.000 | 0.026 | 25.409 |
| rs7281583 | A | G | A | G | 0.293  | 0.094  | 0.050 | 0.052 |  | Interleukin-6 levels                     | 0.000 | 0.060 | 23.542 |
| 0         |   |   |   |   |        |        |       |       |  |                                          |       |       |        |
| rs9271367 | A | G | A | G | 0.126  | -0.001 | 0.016 | 0.927 |  | Interleukin-6 levels                     | 0.000 | 0.025 | 25.069 |
| rs9635812 | A | G | A | G | -0.133 | -0.010 | 0.017 | 0.575 |  | Interleukin-6 levels                     | 0.000 | 0.028 | 22.732 |
| rs9842794 | T | G | T | G | 0.116  | 0.006  | 0.016 | 0.683 |  | Interleukin-6 levels                     | 0.000 | 0.025 | 21.947 |
| rs1003543 | A | G | A | G | 0.192  | -0.003 | 0.035 | 0.940 |  | Interleukin-1-receptor antagonist levels | 0.000 | 0.035 | 30.568 |
| 2         |   |   |   |   |        |        |       |       |  |                                          |       |       |        |
| rs1075549 | G | A | G | A | 0.113  | -0.008 | 0.024 | 0.743 |  | Interleukin-1-receptor antagonist levels | 0.000 | 0.025 | 20.983 |
| 0         |   |   |   |   |        |        |       |       |  |                                          |       |       |        |
| rs1084750 | T | C | T | C | 0.143  | -0.064 | 0.030 | 0.031 |  | Interleukin-1-receptor antagonist        | 0.000 | 0.031 | 20.856 |

|       |   |   |   |   |        |        |       |       |  |                    |       |       |        |
|-------|---|---|---|---|--------|--------|-------|-------|--|--------------------|-------|-------|--------|
| 6     |   |   |   |   |        |        |       |       |  | levels             |       |       |        |
| rs114 |   |   |   |   |        |        |       |       |  | Interleukin-1-rece |       |       |        |
| 4348  | G | T | G | T | 0.320  | 0.055  | 0.070 | 0.443 |  | ptor antagonist    | 0.000 | 0.070 | 21.218 |
| 04    |   |   |   |   |        |        |       |       |  | levels             |       |       |        |
| rs115 |   |   |   |   |        |        |       |       |  | Interleukin-1-rece |       |       |        |
| 3438  | G | A | G | A | 0.509  | 0.136  | 0.112 | 0.223 |  | ptor antagonist    | 0.000 | 0.077 | 43.169 |
| 10    |   |   |   |   |        |        |       |       |  | levels             |       |       |        |
| rs115 |   |   |   |   |        |        |       |       |  | Interleukin-1-rece |       |       |        |
| 4284  | T | C | T | C | -0.341 | 0.008  | 0.070 | 0.916 |  | ptor antagonist    | 0.000 | 0.066 | 27.047 |
| 18    |   |   |   |   |        |        |       |       |  | levels             |       |       |        |
| rs116 |   |   |   |   |        |        |       |       |  | Interleukin-1-rece |       |       |        |
| 1808  | A | G | A | G | 0.430  | 0.028  | 0.098 | 0.787 |  | ptor antagonist    | 0.000 | 0.081 | 28.240 |
| 34    |   |   |   |   |        |        |       |       |  | levels             |       |       |        |
| rs116 |   |   |   |   |        |        |       |       |  | Interleukin-1-rece |       |       |        |
| 7432  | C | T | C | T | 0.472  | -0.032 | 0.063 | 0.596 |  | ptor antagonist    | 0.000 | 0.055 | 74.686 |
| 28    |   |   |   |   |        |        |       |       |  | levels             |       |       |        |
| rs125 |   |   |   |   |        |        |       |       |  | Interleukin-1-rece |       |       |        |
| 3240  | A | G | A | G | 0.245  | -0.001 | 0.052 | 0.999 |  | ptor antagonist    | 0.000 | 0.049 | 24.910 |
| 8     |   |   |   |   |        |        |       |       |  | levels             |       |       |        |
| rs147 |   |   |   |   |        |        |       |       |  | Interleukin-1-rece |       |       |        |
| 8390  | G | A | G | A | 0.327  | 0.086  | 0.062 | 0.165 |  | ptor antagonist    | 0.000 | 0.053 | 37.633 |
| 99    |   |   |   |   |        |        |       |       |  | levels             |       |       |        |
| rs180 |   |   |   |   |        |        |       |       |  | Interleukin-1-rece |       |       |        |
| 8413  | T | G | T | G | 0.363  | -0.037 | 0.075 | 0.588 |  | ptor antagonist    | 0.000 | 0.076 | 22.971 |
| 91    |   |   |   |   |        |        |       |       |  | levels             |       |       |        |
| rs209 | A | G | A | G | 0.180  | 0.010  | 0.041 | 0.803 |  | Interleukin-1-rece | 0.000 | 0.039 | 21.283 |

|            |   |   |   |   |        |        |       |       |  |                                          |       |       |        |
|------------|---|---|---|---|--------|--------|-------|-------|--|------------------------------------------|-------|-------|--------|
| 9700       |   |   |   |   |        |        |       |       |  | ptor antagonist levels                   |       |       |        |
| rs4726575  | G | T | G | T | 0.167  | 0.017  | 0.025 | 0.482 |  | Interleukin-1-receptor antagonist levels | 0.000 | 0.026 | 42.174 |
| rs6453912  | T | C | T | C | 0.123  | -0.016 | 0.026 | 0.536 |  | Interleukin-1-receptor antagonist levels | 0.000 | 0.025 | 24.178 |
| rs6501457  | T | C | T | C | -0.126 | -0.038 | 0.027 | 0.170 |  | Interleukin-1-receptor antagonist levels | 0.000 | 0.027 | 21.665 |
| rs6576081  | C | T | C | T | 0.130  | 0.002  | 0.025 | 0.942 |  | Interleukin-1-receptor antagonist levels | 0.000 | 0.026 | 25.409 |
| rs72815830 | A | G | A | G | 0.293  | 0.061  | 0.078 | 0.405 |  | Interleukin-1-receptor antagonist levels | 0.000 | 0.060 | 23.542 |
| rs9271367  | A | G | A | G | 0.126  | -0.021 | 0.024 | 0.388 |  | Interleukin-1-receptor antagonist levels | 0.000 | 0.025 | 25.069 |
| rs9635812  | A | G | A | G | -0.133 | 0.017  | 0.026 | 0.500 |  | Interleukin-1-receptor antagonist levels | 0.000 | 0.028 | 22.732 |
| rs9842794  | T | G | T | G | 0.116  | -0.006 | 0.024 | 0.796 |  | Interleukin-1-receptor antagonist levels | 0.000 | 0.025 | 21.947 |



|             |   |   |   |   |        |        |       |       |                           |       |       |        |
|-------------|---|---|---|---|--------|--------|-------|-------|---------------------------|-------|-------|--------|
| rs10035432  | A | G | A | G | 0.192  | 0.015  | 0.028 | 0.946 | Interleukin-1-beta levels | 0.000 | 0.035 | 30.568 |
| rs10750     | G | A | G | A | 0.113  | 0.021  | 0.019 | 0.373 | Interleukin-1-beta levels | 0.000 | 0.025 | 20.983 |
| rs1086      | T | C | T | C | 0.143  | -0.005 | 0.023 | 0.047 | Interleukin-1-beta levels | 0.000 | 0.031 | 20.856 |
| rs11404     | G | T | G | T | 0.320  | 0.041  | 0.055 | 0.889 | Interleukin-1-beta levels | 0.000 | 0.070 | 21.218 |
| rs115343810 | G | A | G | A | 0.509  | 0.073  | 0.089 | 0.960 | Interleukin-1-beta levels | 0.000 | 0.077 | 43.169 |
| rs115428418 | T | C | T | C | -0.341 | -0.030 | 0.055 | 0.903 | Interleukin-1-beta levels | 0.000 | 0.066 | 27.047 |
| rs116180834 | A | G | A | G | 0.430  | 0.043  | 0.075 | 0.707 | Interleukin-1-beta levels | 0.000 | 0.081 | 28.240 |
| rs116743228 | C | T | C | T | 0.472  | 0.048  | 0.050 | 0.711 | Interleukin-1-beta levels | 0.000 | 0.055 | 74.686 |
| rs1253240   | A | G | A | G | 0.245  | -0.033 | 0.042 | 0.340 | Interleukin-1-beta levels | 0.000 | 0.049 | 24.910 |

|       |   |   |   |   |        |        |       |       |                           |       |       |        |  |
|-------|---|---|---|---|--------|--------|-------|-------|---------------------------|-------|-------|--------|--|
| 8     |   |   |   |   |        |        |       |       |                           |       |       |        |  |
| rs147 |   |   |   |   |        |        |       |       |                           |       |       |        |  |
| 8390  | G | A | G | A | 0.327  | 0.092  | 0.049 | 0.078 | Interleukin-1-beta levels | 0.000 | 0.053 | 37.633 |  |
| 99    |   |   |   |   |        |        |       |       |                           |       |       |        |  |
| rs180 |   |   |   |   |        |        |       |       |                           |       |       |        |  |
| 8413  | T | G | T | G | 0.363  | -0.026 | 0.060 | 0.581 | Interleukin-1-beta levels | 0.000 | 0.076 | 22.971 |  |
| 91    |   |   |   |   |        |        |       |       |                           |       |       |        |  |
| rs191 |   |   |   |   |        |        |       |       |                           |       |       |        |  |
| 0413  | T | C | T | C | 0.651  | 0.208  | 0.126 | 0.108 | Interleukin-1-beta levels | 0.000 | 0.068 | 91.635 |  |
| 65    |   |   |   |   |        |        |       |       |                           |       |       |        |  |
| rs209 |   |   |   |   |        |        |       |       |                           |       |       |        |  |
| 9700  | A | G | A | G | 0.180  | -0.011 | 0.032 | 0.908 | Interleukin-1-beta levels | 0.000 | 0.039 | 21.283 |  |
| rs472 |   |   |   |   |        |        |       |       |                           |       |       |        |  |
| 6575  | G | T | G | T | 0.167  | 0.019  | 0.019 | 0.461 | Interleukin-1-beta levels | 0.000 | 0.026 | 42.174 |  |
| rs645 |   |   |   |   |        |        |       |       |                           |       |       |        |  |
| 3912  | T | C | T | C | 0.123  | -0.027 | 0.020 | 0.384 | Interleukin-1-beta levels | 0.000 | 0.025 | 24.178 |  |
| rs650 |   |   |   |   |        |        |       |       |                           |       |       |        |  |
| 1457  | T | C | T | C | -0.126 | 0.002  | 0.022 | 0.336 | Interleukin-1-beta levels | 0.000 | 0.027 | 21.665 |  |
| rs657 |   |   |   |   |        |        |       |       |                           |       |       |        |  |
| 6081  | C | T | C | T | 0.130  | 0.029  | 0.020 | 0.378 | Interleukin-1-beta levels | 0.000 | 0.026 | 25.409 |  |
| rs728 |   |   |   |   |        |        |       |       |                           |       |       |        |  |
| 1583  | A | G | A | G | 0.293  | 0.051  | 0.062 | 0.161 | Interleukin-1-beta levels | 0.000 | 0.060 | 23.542 |  |
| 0     |   |   |   |   |        |        |       |       |                           |       |       |        |  |
| rs927 |   |   |   |   |        |        |       |       |                           |       |       |        |  |
| 1367  | A | G | A | G | 0.126  | -0.005 | 0.019 | 0.528 | Interleukin-1-beta levels | 0.000 | 0.025 | 25.069 |  |
| rs963 |   |   |   |   |        |        |       |       |                           |       |       |        |  |
|       | A | G | A | G | -0.133 | 0.002  | 0.021 | 0.746 | Interleukin-1-beta        | 0.000 | 0.028 | 22.732 |  |

|       |   |   |   |   |       |        |       |       |  |                    |       |       |        |
|-------|---|---|---|---|-------|--------|-------|-------|--|--------------------|-------|-------|--------|
| 5812  |   |   |   |   |       |        |       |       |  | levels             |       |       |        |
| rs984 | T | G | T | G | 0.116 | 0.015  | 0.019 | 0.219 |  | Interleukin-1-beta | 0.000 | 0.025 | 21.947 |
| 2794  |   |   |   |   |       |        |       |       |  | levels             |       |       |        |
| rs100 |   |   |   |   |       |        |       |       |  | Hepatocyte         |       |       |        |
| 3543  | A | G | A | G | 0.192 | -0.001 | 0.024 | 0.915 |  | growth factor      | 0.000 | 0.035 | 30.568 |
| 2     |   |   |   |   |       |        |       |       |  | levels             |       |       |        |
| rs107 |   |   |   |   |       |        |       |       |  | Hepatocyte         |       |       |        |
| 5549  | G | A | G | A | 0.113 | -0.001 | 0.016 | 0.940 |  | growth factor      | 0.000 | 0.025 | 20.983 |
| 0     |   |   |   |   |       |        |       |       |  | levels             |       |       |        |
| rs108 |   |   |   |   |       |        |       |       |  | Hepatocyte         |       |       |        |
| 4750  | T | C | T | C | 0.143 | 0.008  | 0.020 | 0.681 |  | growth factor      | 0.000 | 0.031 | 20.856 |
| 6     |   |   |   |   |       |        |       |       |  | levels             |       |       |        |
| rs114 |   |   |   |   |       |        |       |       |  | Hepatocyte         |       |       |        |
| 4348  | G | T | G | T | 0.320 | 0.037  | 0.046 | 0.419 |  | growth factor      | 0.000 | 0.070 | 21.218 |
| 04    |   |   |   |   |       |        |       |       |  | levels             |       |       |        |
| rs115 |   |   |   |   |       |        |       |       |  | Hepatocyte         |       |       |        |
| 3438  | G | A | G | A | 0.509 | 0.009  | 0.076 | 0.908 |  | growth factor      | 0.000 | 0.077 | 43.169 |
| 10    |   |   |   |   |       |        |       |       |  | levels             |       |       |        |
| rs116 |   |   |   |   |       |        |       |       |  | Hepatocyte         |       |       |        |
| 1808  | A | G | A | G | 0.430 | 0.010  | 0.066 | 0.867 |  | growth factor      | 0.000 | 0.081 | 28.240 |
| 34    |   |   |   |   |       |        |       |       |  | levels             |       |       |        |
| rs116 |   |   |   |   |       |        |       |       |  | Hepatocyte         |       |       |        |
| 7432  | C | T | C | T | 0.472 | -0.014 | 0.044 | 0.747 |  | growth factor      | 0.000 | 0.055 | 74.686 |
| 28    |   |   |   |   |       |        |       |       |  | levels             |       |       |        |
| rs125 |   |   |   |   |       |        |       |       |  | Hepatocyte         |       |       |        |
| 3240  | A | G | A | G | 0.245 | 0.016  | 0.035 | 0.667 |  | growth factor      | 0.000 | 0.049 | 24.910 |

|       |   |   |   |   |        |        |       |       |  |               |       |       |        |
|-------|---|---|---|---|--------|--------|-------|-------|--|---------------|-------|-------|--------|
| 8     |   |   |   |   |        |        |       |       |  | levels        |       |       |        |
| rs147 |   |   |   |   |        |        |       |       |  | Hepatocyte    |       |       |        |
| 8390  | G | A | G | A | 0.327  | 0.004  | 0.042 | 0.932 |  | growth factor | 0.000 | 0.053 | 37.633 |
| 99    |   |   |   |   |        |        |       |       |  | levels        |       |       |        |
| rs180 |   |   |   |   |        |        |       |       |  | Hepatocyte    |       |       |        |
| 8413  | T | G | T | G | 0.363  | -0.026 | 0.050 | 0.593 |  | growth factor | 0.000 | 0.076 | 22.971 |
| 91    |   |   |   |   |        |        |       |       |  | levels        |       |       |        |
| rs191 |   |   |   |   |        |        |       |       |  | Hepatocyte    |       |       |        |
| 0413  | T | C | T | C | 0.651  | -0.050 | 0.084 | 0.547 |  | growth factor | 0.000 | 0.068 | 91.635 |
| 65    |   |   |   |   |        |        |       |       |  | levels        |       |       |        |
| rs209 |   |   |   |   |        |        |       |       |  | Hepatocyte    |       |       |        |
| 9700  | A | G | A | G | 0.180  | 0.042  | 0.027 | 0.116 |  | growth factor | 0.000 | 0.039 | 21.283 |
|       |   |   |   |   |        |        |       |       |  | levels        |       |       |        |
| rs472 |   |   |   |   |        |        |       |       |  | Hepatocyte    |       |       |        |
| 6575  | G | T | G | T | 0.167  | 0.002  | 0.016 | 0.923 |  | growth factor | 0.000 | 0.026 | 42.174 |
|       |   |   |   |   |        |        |       |       |  | levels        |       |       |        |
| rs645 |   |   |   |   |        |        |       |       |  | Hepatocyte    |       |       |        |
| 3912  | T | C | T | C | 0.123  | 0.000  | 0.017 | 0.988 |  | growth factor | 0.000 | 0.025 | 24.178 |
|       |   |   |   |   |        |        |       |       |  | levels        |       |       |        |
| rs650 |   |   |   |   |        |        |       |       |  | Hepatocyte    |       |       |        |
| 1457  | T | C | T | C | -0.126 | 0.018  | 0.019 | 0.332 |  | growth factor | 0.000 | 0.027 | 21.665 |
|       |   |   |   |   |        |        |       |       |  | levels        |       |       |        |
| rs657 |   |   |   |   |        |        |       |       |  | Hepatocyte    |       |       |        |
| 6081  | C | T | C | T | 0.130  | -0.017 | 0.017 | 0.330 |  | growth factor | 0.000 | 0.026 | 25.409 |
|       |   |   |   |   |        |        |       |       |  | levels        |       |       |        |
| rs728 | A | G | A | G | 0.293  | 0.088  | 0.050 | 0.075 |  | Hepatocyte    | 0.000 | 0.060 | 23.542 |

|             |   |   |   |   |        |        |       |       |  |                                 |       |       |        |
|-------------|---|---|---|---|--------|--------|-------|-------|--|---------------------------------|-------|-------|--------|
| 15830       |   |   |   |   |        |        |       |       |  | growth factor levels            |       |       |        |
| rs9271367   | A | G | A | G | 0.126  | 0.015  | 0.016 | 0.351 |  | Hepatocyte growth factor levels | 0.000 | 0.025 | 25.069 |
| rs9635812   | A | G | A | G | -0.133 | 0.007  | 0.017 | 0.681 |  | Hepatocyte growth factor levels | 0.000 | 0.028 | 22.732 |
| rs9842794   | T | G | T | G | 0.116  | -0.019 | 0.016 | 0.230 |  | Hepatocyte growth factor levels | 0.000 | 0.025 | 21.947 |
| rs10035432  | A | G | A | G | 0.192  | 0.057  | 0.035 | 0.108 |  | Interleukin-9 levels            | 0.000 | 0.035 | 30.568 |
| rs10755490  | G | A | G | A | 0.113  | 0.031  | 0.024 | 0.203 |  | Interleukin-9 levels            | 0.000 | 0.025 | 20.983 |
| rs10847506  | T | C | T | C | 0.143  | -0.069 | 0.030 | 0.020 |  | Interleukin-9 levels            | 0.000 | 0.031 | 20.856 |
| rs114434804 | G | T | G | T | 0.320  | 0.051  | 0.070 | 0.480 |  | Interleukin-9 levels            | 0.000 | 0.070 | 21.218 |
| rs115343810 | G | A | G | A | 0.509  | 0.107  | 0.112 | 0.344 |  | Interleukin-9 levels            | 0.000 | 0.077 | 43.169 |

|                     |   |   |   |   |        |        |       |       |                         |       |       |        |
|---------------------|---|---|---|---|--------|--------|-------|-------|-------------------------|-------|-------|--------|
| rs115<br>4284<br>18 | T | C | T | C | -0.341 | -0.033 | 0.070 | 0.643 | Interleukin-9<br>levels | 0.000 | 0.066 | 27.047 |
| rs116<br>1808<br>34 | A | G | A | G | 0.430  | -0.046 | 0.098 | 0.635 | Interleukin-9<br>levels | 0.000 | 0.081 | 28.240 |
| rs116<br>7432<br>28 | C | T | C | T | 0.472  | -0.010 | 0.063 | 0.870 | Interleukin-9<br>levels | 0.000 | 0.055 | 74.686 |
| rs125<br>3240<br>8  | A | G | A | G | 0.245  | -0.054 | 0.052 | 0.312 | Interleukin-9<br>levels | 0.000 | 0.049 | 24.910 |
| rs147<br>8390<br>99 | G | A | G | A | 0.327  | 0.065  | 0.060 | 0.272 | Interleukin-9<br>levels | 0.000 | 0.053 | 37.633 |
| rs180<br>8413<br>91 | T | G | T | G | 0.363  | 0.071  | 0.075 | 0.359 | Interleukin-9<br>levels | 0.000 | 0.076 | 22.971 |
| rs209<br>9700       | A | G | A | G | 0.180  | 0.045  | 0.041 | 0.265 | Interleukin-9<br>levels | 0.000 | 0.039 | 21.283 |
| rs472<br>6575       | G | T | G | T | 0.167  | -0.019 | 0.025 | 0.443 | Interleukin-9<br>levels | 0.000 | 0.026 | 42.174 |
| rs645<br>3912       | T | C | T | C | 0.123  | -0.039 | 0.026 | 0.129 | Interleukin-9<br>levels | 0.000 | 0.025 | 24.178 |
| rs650<br>1457       | T | C | T | C | -0.126 | -0.002 | 0.027 | 0.940 | Interleukin-9<br>levels | 0.000 | 0.027 | 21.665 |

|                     |   |   |   |   |        |        |       |       |                         |       |       |        |
|---------------------|---|---|---|---|--------|--------|-------|-------|-------------------------|-------|-------|--------|
| rs657<br>6081       | C | T | C | T | 0.130  | 0.026  | 0.025 | 0.294 | Interleukin-9<br>levels | 0.000 | 0.026 | 25.409 |
| rs728<br>1583<br>0  | A | G | A | G | 0.293  | -0.033 | 0.078 | 0.708 | Interleukin-9<br>levels | 0.000 | 0.060 | 23.542 |
| rs927<br>1367       | A | G | A | G | 0.126  | 0.005  | 0.024 | 0.824 | Interleukin-9<br>levels | 0.000 | 0.025 | 25.069 |
| rs963<br>5812       | A | G | A | G | -0.133 | 0.001  | 0.026 | 0.981 | Interleukin-9<br>levels | 0.000 | 0.028 | 22.732 |
| rs984<br>2794       | T | G | T | G | 0.116  | 0.022  | 0.024 | 0.354 | Interleukin-9<br>levels | 0.000 | 0.025 | 21.947 |
| rs100<br>3543<br>2  | A | G | A | G | 0.192  | 0.055  | 0.036 | 0.125 | Interleukin-7<br>levels | 0.000 | 0.035 | 30.568 |
| rs107<br>5549<br>0  | G | A | G | A | 0.113  | 0.036  | 0.025 | 0.147 | Interleukin-7<br>levels | 0.000 | 0.025 | 20.983 |
| rs108<br>4750<br>6  | T | C | T | C | 0.143  | -0.014 | 0.030 | 0.658 | Interleukin-7<br>levels | 0.000 | 0.031 | 20.856 |
| rs114<br>4348<br>04 | G | T | G | T | 0.320  | 0.102  | 0.073 | 0.166 | Interleukin-7<br>levels | 0.000 | 0.070 | 21.218 |
| rs115<br>3438<br>10 | G | A | G | A | 0.509  | 0.047  | 0.113 | 0.678 | Interleukin-7<br>levels | 0.000 | 0.077 | 43.169 |

|                     |   |   |   |   |        |        |       |       |                         |       |       |        |
|---------------------|---|---|---|---|--------|--------|-------|-------|-------------------------|-------|-------|--------|
| rs115<br>4284<br>18 | T | C | T | C | -0.341 | -0.020 | 0.071 | 0.777 | Interleukin-7<br>levels | 0.000 | 0.066 | 27.047 |
| rs116<br>1808<br>34 | A | G | A | G | 0.430  | 0.073  | 0.098 | 0.452 | Interleukin-7<br>levels | 0.000 | 0.081 | 28.240 |
| rs116<br>7432<br>28 | C | T | C | T | 0.472  | -0.029 | 0.065 | 0.640 | Interleukin-7<br>levels | 0.000 | 0.055 | 74.686 |
| rs125<br>3240<br>8  | A | G | A | G | 0.245  | 0.011  | 0.054 | 0.824 | Interleukin-7<br>levels | 0.000 | 0.049 | 24.910 |
| rs147<br>8390<br>99 | G | A | G | A | 0.327  | 0.082  | 0.064 | 0.204 | Interleukin-7<br>levels | 0.000 | 0.053 | 37.633 |
| rs180<br>8413<br>91 | T | G | T | G | 0.363  | 0.031  | 0.077 | 0.712 | Interleukin-7<br>levels | 0.000 | 0.076 | 22.971 |
| rs209<br>9700       | A | G | A | G | 0.180  | 0.013  | 0.042 | 0.746 | Interleukin-7<br>levels | 0.000 | 0.039 | 21.283 |
| rs472<br>6575       | G | T | G | T | 0.167  | -0.026 | 0.025 | 0.318 | Interleukin-7<br>levels | 0.000 | 0.026 | 42.174 |
| rs645<br>3912       | T | C | T | C | 0.123  | 0.013  | 0.026 | 0.607 | Interleukin-7<br>levels | 0.000 | 0.025 | 24.178 |
| rs650<br>1457       | T | C | T | C | -0.126 | -0.018 | 0.028 | 0.530 | Interleukin-7<br>levels | 0.000 | 0.027 | 21.665 |



|                     |   |   |   |   |        |        |       |       |                         |       |       |        |
|---------------------|---|---|---|---|--------|--------|-------|-------|-------------------------|-------|-------|--------|
| rs657<br>6081       | C | T | C | T | 0.130  | 0.022  | 0.026 | 0.403 | Interleukin-7<br>levels | 0.000 | 0.026 | 25.409 |
| rs728<br>1583<br>0  | A | G | A | G | 0.293  | 0.113  | 0.081 | 0.163 | Interleukin-7<br>levels | 0.000 | 0.060 | 23.542 |
| rs927<br>1367       | A | G | A | G | 0.126  | -0.008 | 0.024 | 0.741 | Interleukin-7<br>levels | 0.000 | 0.025 | 25.069 |
| rs963<br>5812       | A | G | A | G | -0.133 | 0.010  | 0.027 | 0.701 | Interleukin-7<br>levels | 0.000 | 0.028 | 22.732 |
| rs984<br>2794       | T | G | T | G | 0.116  | 0.028  | 0.024 | 0.250 | Interleukin-7<br>levels | 0.000 | 0.025 | 21.947 |
| rs100<br>3543<br>2  | A | G | A | G | 0.192  | -0.030 | 0.036 | 0.407 | Interleukin-5<br>levels | 0.000 | 0.035 | 30.568 |
| rs107<br>5549<br>0  | G | A | G | A | 0.113  | 0.046  | 0.025 | 0.067 | Interleukin-5<br>levels | 0.000 | 0.025 | 20.983 |
| rs108<br>4750<br>6  | T | C | T | C | 0.143  | -0.022 | 0.031 | 0.482 | Interleukin-5<br>levels | 0.000 | 0.031 | 20.856 |
| rs114<br>4348<br>04 | G | T | G | T | 0.320  | -0.021 | 0.073 | 0.752 | Interleukin-5<br>levels | 0.000 | 0.070 | 21.218 |
| rs115<br>3438<br>10 | G | A | G | A | 0.509  | 0.139  | 0.120 | 0.246 | Interleukin-5<br>levels | 0.000 | 0.077 | 43.169 |

|                     |   |   |   |   |        |        |       |       |                         |       |       |        |
|---------------------|---|---|---|---|--------|--------|-------|-------|-------------------------|-------|-------|--------|
| rs115<br>4284<br>18 | T | C | T | C | -0.341 | -0.004 | 0.071 | 0.977 | Interleukin-5<br>levels | 0.000 | 0.066 | 27.047 |
| rs116<br>1808<br>34 | A | G | A | G | 0.430  | 0.023  | 0.099 | 0.807 | Interleukin-5<br>levels | 0.000 | 0.081 | 28.240 |
| rs116<br>7432<br>28 | C | T | C | T | 0.472  | 0.059  | 0.066 | 0.369 | Interleukin-5<br>levels | 0.000 | 0.055 | 74.686 |
| rs125<br>3240<br>8  | A | G | A | G | 0.245  | -0.008 | 0.054 | 0.898 | Interleukin-5<br>levels | 0.000 | 0.049 | 24.910 |
| rs147<br>8390<br>99 | G | A | G | A | 0.327  | 0.070  | 0.065 | 0.303 | Interleukin-5<br>levels | 0.000 | 0.053 | 37.633 |
| rs180<br>8413<br>91 | T | G | T | G | 0.363  | 0.041  | 0.078 | 0.627 | Interleukin-5<br>levels | 0.000 | 0.076 | 22.971 |
| rs191<br>0413<br>65 | T | C | T | C | 0.651  | 0.112  | 0.115 | 0.340 | Interleukin-5<br>levels | 0.000 | 0.068 | 91.635 |
| rs209<br>9700       | A | G | A | G | 0.180  | 0.008  | 0.042 | 0.849 | Interleukin-5<br>levels | 0.000 | 0.039 | 21.283 |
| rs472<br>6575       | G | T | G | T | 0.167  | -0.015 | 0.025 | 0.559 | Interleukin-5<br>levels | 0.000 | 0.026 | 42.174 |
| rs645               | T | C | T | C | 0.123  | 0.019  | 0.027 | 0.479 | Interleukin-5           | 0.000 | 0.025 | 24.178 |



|                     |   |   |   |   |        |        |       |       |                         |       |       |        |
|---------------------|---|---|---|---|--------|--------|-------|-------|-------------------------|-------|-------|--------|
| rs115<br>3438<br>10 | G | A | G | A | 0.509  | 0.097  | 0.076 | 0.204 | Interleukin-4<br>levels | 0.000 | 0.077 | 43.169 |
| rs115<br>4284<br>18 | T | C | T | C | -0.341 | 0.081  | 0.046 | 0.081 | Interleukin-4<br>levels | 0.000 | 0.066 | 27.047 |
| rs116<br>1808<br>34 | A | G | A | G | 0.430  | -0.051 | 0.065 | 0.442 | Interleukin-4<br>levels | 0.000 | 0.081 | 28.240 |
| rs116<br>7432<br>28 | C | T | C | T | 0.472  | 0.052  | 0.044 | 0.253 | Interleukin-4<br>levels | 0.000 | 0.055 | 74.686 |
| rs125<br>3240<br>8  | A | G | A | G | 0.245  | 0.025  | 0.035 | 0.465 | Interleukin-4<br>levels | 0.000 | 0.049 | 24.910 |
| rs147<br>8390<br>99 | G | A | G | A | 0.327  | 0.021  | 0.042 | 0.654 | Interleukin-4<br>levels | 0.000 | 0.053 | 37.633 |
| rs180<br>8413<br>91 | T | G | T | G | 0.363  | 0.009  | 0.051 | 0.901 | Interleukin-4<br>levels | 0.000 | 0.076 | 22.971 |
| rs191<br>0413<br>65 | T | C | T | C | 0.651  | 0.109  | 0.084 | 0.198 | Interleukin-4<br>levels | 0.000 | 0.068 | 91.635 |
| rs209<br>9700       | A | G | A | G | 0.180  | -0.004 | 0.027 | 0.891 | Interleukin-4<br>levels | 0.000 | 0.039 | 21.283 |

|            |   |   |   |   |        |        |       |       |                                          |       |       |        |
|------------|---|---|---|---|--------|--------|-------|-------|------------------------------------------|-------|-------|--------|
| rs4726575  | G | T | G | T | 0.167  | -0.002 | 0.016 | 0.925 | Interleukin-4 levels                     | 0.000 | 0.026 | 42.174 |
| rs6453912  | T | C | T | C | 0.123  | 0.003  | 0.017 | 0.850 | Interleukin-4 levels                     | 0.000 | 0.025 | 24.178 |
| rs6501457  | T | C | T | C | -0.126 | 0.006  | 0.019 | 0.740 | Interleukin-4 levels                     | 0.000 | 0.027 | 21.665 |
| rs6576081  | C | T | C | T | 0.130  | 0.045  | 0.017 | 0.011 | Interleukin-4 levels                     | 0.000 | 0.026 | 25.409 |
| rs72815830 | A | G | A | G | 0.293  | 0.060  | 0.050 | 0.222 | Interleukin-4 levels                     | 0.000 | 0.060 | 23.542 |
| rs9271367  | A | G | A | G | 0.126  | -0.011 | 0.016 | 0.486 | Interleukin-4 levels                     | 0.000 | 0.025 | 25.069 |
| rs9635812  | A | G | A | G | -0.133 | -0.002 | 0.018 | 0.926 | Interleukin-4 levels                     | 0.000 | 0.028 | 22.732 |
| rs9842794  | T | G | T | G | 0.116  | -0.008 | 0.016 | 0.633 | Interleukin-4 levels                     | 0.000 | 0.025 | 21.947 |
| rs10035432 | A | G | A | G | 0.192  | 0.039  | 0.035 | 0.260 | Interleukin-2 receptor antagonist levels | 0.000 | 0.035 | 30.568 |
| rs10755490 | G | A | G | A | 0.113  | -0.007 | 0.024 | 0.786 | Interleukin-2 receptor antagonist levels | 0.000 | 0.025 | 20.983 |
| rs10847506 | T | C | T | C | 0.143  | 0.013  | 0.030 | 0.645 | Interleukin-2 receptor antagonist levels | 0.000 | 0.031 | 20.856 |

|       |   |   |   |   |        |        |       |       |  |                   |       |       |        |
|-------|---|---|---|---|--------|--------|-------|-------|--|-------------------|-------|-------|--------|
| rs114 |   |   |   |   |        |        |       |       |  | Interleukin-2     |       |       |        |
| 4348  | G | T | G | T | 0.320  | 0.067  | 0.069 | 0.326 |  | receptor          | 0.000 | 0.070 | 21.218 |
| 04    |   |   |   |   |        |        |       |       |  | antagonist levels |       |       |        |
| rs115 |   |   |   |   |        |        |       |       |  | Interleukin-2     |       |       |        |
| 3438  | G | A | G | A | 0.509  | 0.155  | 0.110 | 0.160 |  | receptor          | 0.000 | 0.077 | 43.169 |
| 10    |   |   |   |   |        |        |       |       |  | antagonist levels |       |       |        |
| rs115 |   |   |   |   |        |        |       |       |  | Interleukin-2     |       |       |        |
| 4284  | T | C | T | C | -0.341 | -0.036 | 0.070 | 0.609 |  | receptor          | 0.000 | 0.066 | 27.047 |
| 18    |   |   |   |   |        |        |       |       |  | antagonist levels |       |       |        |
| rs116 |   |   |   |   |        |        |       |       |  | Interleukin-2     |       |       |        |
| 1808  | A | G | A | G | 0.430  | 0.124  | 0.097 | 0.202 |  | receptor          | 0.000 | 0.081 | 28.240 |
| 34    |   |   |   |   |        |        |       |       |  | antagonist levels |       |       |        |
| rs116 |   |   |   |   |        |        |       |       |  | Interleukin-2     |       |       |        |
| 7432  | C | T | C | T | 0.472  | 0.023  | 0.062 | 0.714 |  | receptor          | 0.000 | 0.055 | 74.686 |
| 28    |   |   |   |   |        |        |       |       |  | antagonist levels |       |       |        |
| rs125 |   |   |   |   |        |        |       |       |  | Interleukin-2     |       |       |        |
| 3240  | A | G | A | G | 0.245  | -0.013 | 0.052 | 0.798 |  | receptor          | 0.000 | 0.049 | 24.910 |
| 8     |   |   |   |   |        |        |       |       |  | antagonist levels |       |       |        |
| rs147 |   |   |   |   |        |        |       |       |  | Interleukin-2     |       |       |        |
| 8390  | G | A | G | A | 0.327  | -0.065 | 0.060 | 0.279 |  | receptor          | 0.000 | 0.053 | 37.633 |
| 99    |   |   |   |   |        |        |       |       |  | antagonist levels |       |       |        |
| rs180 |   |   |   |   |        |        |       |       |  | Interleukin-2     |       |       |        |
| 8413  | T | G | T | G | 0.363  | 0.050  | 0.075 | 0.503 |  | receptor          | 0.000 | 0.076 | 22.971 |
| 91    |   |   |   |   |        |        |       |       |  | antagonist levels |       |       |        |
| rs209 |   |   |   |   |        |        |       |       |  | Interleukin-2     |       |       |        |
| 9700  | A | G | A | G | 0.180  | 0.007  | 0.041 | 0.874 |  | receptor          | 0.000 | 0.039 | 21.283 |

|       |   |   |   |   |        |        |       |       |                                                |       |       |        |
|-------|---|---|---|---|--------|--------|-------|-------|------------------------------------------------|-------|-------|--------|
| rs472 | G | T | G | T | 0.167  | -0.005 | 0.024 | 0.836 | antagonist levels<br>Interleukin-2<br>receptor | 0.000 | 0.026 | 42.174 |
| 6575  |   |   |   |   |        |        |       |       |                                                |       |       |        |
| rs645 | T | C | T | C | 0.123  | -0.005 | 0.025 | 0.854 | antagonist levels<br>Interleukin-2<br>receptor | 0.000 | 0.025 | 24.178 |
| 3912  |   |   |   |   |        |        |       |       |                                                |       |       |        |
| rs650 | T | C | T | C | -0.126 | 0.060  | 0.027 | 0.027 | antagonist levels<br>Interleukin-2<br>receptor | 0.000 | 0.027 | 21.665 |
| 1457  |   |   |   |   |        |        |       |       |                                                |       |       |        |
| rs657 | C | T | C | T | 0.130  | -0.015 | 0.025 | 0.542 | antagonist levels<br>Interleukin-2<br>receptor | 0.000 | 0.026 | 25.409 |
| 6081  |   |   |   |   |        |        |       |       |                                                |       |       |        |
| rs728 | A | G | A | G | 0.293  | 0.120  | 0.078 | 0.115 | antagonist levels<br>Interleukin-2<br>receptor | 0.000 | 0.060 | 23.542 |
| 1583  |   |   |   |   |        |        |       |       |                                                |       |       |        |
| 0     |   |   |   |   |        |        |       |       |                                                |       |       |        |
| rs927 | A | G | A | G | 0.126  | -0.006 | 0.024 | 0.808 | antagonist levels<br>Interleukin-2<br>receptor | 0.000 | 0.025 | 25.069 |
| 1367  |   |   |   |   |        |        |       |       |                                                |       |       |        |
| rs963 | A | G | A | G | -0.133 | -0.004 | 0.026 | 0.894 | antagonist levels<br>Interleukin-2<br>receptor | 0.000 | 0.028 | 22.732 |
| 5812  |   |   |   |   |        |        |       |       |                                                |       |       |        |
| rs984 | T | G | T | G | 0.116  | -0.012 | 0.023 | 0.601 | antagonist levels<br>Interleukin-2<br>receptor | 0.000 | 0.025 | 21.947 |
| 2794  |   |   |   |   |        |        |       |       |                                                |       |       |        |
| rs100 | A | G | A | G | 0.192  | -0.003 | 0.036 | 0.935 | antagonist levels<br>Interleukin-2             | 0.000 | 0.035 | 30.568 |

|       |   |   |   |   |        |        |       |       |               |        |       |        |  |
|-------|---|---|---|---|--------|--------|-------|-------|---------------|--------|-------|--------|--|
| 3543  |   |   |   |   |        |        |       |       |               | levels |       |        |  |
| 2     |   |   |   |   |        |        |       |       |               |        |       |        |  |
| rs107 |   |   |   |   |        |        |       |       |               |        |       |        |  |
| 5549  | G | A | G | A | 0.113  | -0.003 | 0.025 | 0.912 | Interleukin-2 | 0.000  | 0.025 | 20.983 |  |
| 0     |   |   |   |   |        |        |       |       | levels        |        |       |        |  |
| rs108 |   |   |   |   |        |        |       |       |               |        |       |        |  |
| 4750  | T | C | T | C | 0.143  | -0.059 | 0.030 | 0.052 | Interleukin-2 | 0.000  | 0.031 | 20.856 |  |
| 6     |   |   |   |   |        |        |       |       | levels        |        |       |        |  |
| rs114 |   |   |   |   |        |        |       |       |               |        |       |        |  |
| 4348  | G | T | G | T | 0.320  | 0.164  | 0.072 | 0.024 | Interleukin-2 | 0.000  | 0.070 | 21.218 |  |
| 04    |   |   |   |   |        |        |       |       | levels        |        |       |        |  |
| rs115 |   |   |   |   |        |        |       |       |               |        |       |        |  |
| 3438  | G | A | G | A | 0.509  | 0.072  | 0.115 | 0.537 | Interleukin-2 | 0.000  | 0.077 | 43.169 |  |
| 10    |   |   |   |   |        |        |       |       | levels        |        |       |        |  |
| rs115 |   |   |   |   |        |        |       |       |               |        |       |        |  |
| 4284  | T | C | T | C | -0.341 | 0.064  | 0.070 | 0.365 | Interleukin-2 | 0.000  | 0.066 | 27.047 |  |
| 18    |   |   |   |   |        |        |       |       | levels        |        |       |        |  |
| rs116 |   |   |   |   |        |        |       |       |               |        |       |        |  |
| 1808  | A | G | A | G | 0.430  | 0.053  | 0.098 | 0.579 | Interleukin-2 | 0.000  | 0.081 | 28.240 |  |
| 34    |   |   |   |   |        |        |       |       | levels        |        |       |        |  |
| rs116 |   |   |   |   |        |        |       |       |               |        |       |        |  |
| 7432  | C | T | C | T | 0.472  | 0.053  | 0.064 | 0.418 | Interleukin-2 | 0.000  | 0.055 | 74.686 |  |
| 28    |   |   |   |   |        |        |       |       | levels        |        |       |        |  |
| rs125 |   |   |   |   |        |        |       |       |               |        |       |        |  |
| 3240  | A | G | A | G | 0.245  | -0.052 | 0.053 | 0.332 | Interleukin-2 | 0.000  | 0.049 | 24.910 |  |
| 8     |   |   |   |   |        |        |       |       | levels        |        |       |        |  |



|                     |   |   |   |   |        |        |       |       |                         |       |       |        |
|---------------------|---|---|---|---|--------|--------|-------|-------|-------------------------|-------|-------|--------|
| rs147<br>8390<br>99 | G | A | G | A | 0.327  | 0.128  | 0.062 | 0.041 | Interleukin-2<br>levels | 0.000 | 0.053 | 37.633 |
| rs180<br>8413<br>91 | T | G | T | G | 0.363  | -0.061 | 0.077 | 0.380 | Interleukin-2<br>levels | 0.000 | 0.076 | 22.971 |
| rs209<br>9700       | A | G | A | G | 0.180  | 0.059  | 0.042 | 0.156 | Interleukin-2<br>levels | 0.000 | 0.039 | 21.283 |
| rs472<br>6575       | G | T | G | T | 0.167  | 0.006  | 0.025 | 0.810 | Interleukin-2<br>levels | 0.000 | 0.026 | 42.174 |
| rs645<br>3912       | T | C | T | C | 0.123  | 0.015  | 0.026 | 0.553 | Interleukin-2<br>levels | 0.000 | 0.025 | 24.178 |
| rs650<br>1457       | T | C | T | C | -0.126 | -0.060 | 0.028 | 0.031 | Interleukin-2<br>levels | 0.000 | 0.027 | 21.665 |
| rs657<br>6081       | C | T | C | T | 0.130  | 0.003  | 0.026 | 0.907 | Interleukin-2<br>levels | 0.000 | 0.026 | 25.409 |
| rs728<br>1583<br>0  | A | G | A | G | 0.293  | 0.054  | 0.081 | 0.484 | Interleukin-2<br>levels | 0.000 | 0.060 | 23.542 |
| rs927<br>1367       | A | G | A | G | 0.126  | -0.024 | 0.024 | 0.327 | Interleukin-2<br>levels | 0.000 | 0.025 | 25.069 |
| rs963<br>5812       | A | G | A | G | -0.133 | 0.056  | 0.027 | 0.035 | Interleukin-2<br>levels | 0.000 | 0.028 | 22.732 |
| rs984<br>2794       | T | G | T | G | 0.116  | 0.000  | 0.024 | 1.000 | Interleukin-2<br>levels | 0.000 | 0.025 | 21.947 |
| rs100               | A | G | A | G | 0.192  | 0.002  | 0.025 | 0.970 | Interferon gamma        | 0.000 | 0.035 | 30.568 |



|             |   |   |   |   |        |        |       |       |                         |       |       |        |
|-------------|---|---|---|---|--------|--------|-------|-------|-------------------------|-------|-------|--------|
| rs147839099 | G | A | G | A | 0.327  | 0.081  | 0.043 | 0.066 | Interferon gamma levels | 0.000 | 0.053 | 37.633 |
| rs18091     | T | G | T | G | 0.363  | -0.054 | 0.052 | 0.291 | Interferon gamma levels | 0.000 | 0.076 | 22.971 |
| rs191041365 | T | C | T | C | 0.651  | 0.056  | 0.086 | 0.517 | Interferon gamma levels | 0.000 | 0.068 | 91.635 |
| rs2099700   | A | G | A | G | 0.180  | 0.011  | 0.028 | 0.682 | Interferon gamma levels | 0.000 | 0.039 | 21.283 |
| rs4726575   | G | T | G | T | 0.167  | -0.017 | 0.017 | 0.306 | Interferon gamma levels | 0.000 | 0.026 | 42.174 |
| rs6453912   | T | C | T | C | 0.123  | 0.026  | 0.018 | 0.129 | Interferon gamma levels | 0.000 | 0.025 | 24.178 |
| rs6501457   | T | C | T | C | -0.126 | -0.013 | 0.019 | 0.513 | Interferon gamma levels | 0.000 | 0.027 | 21.665 |
| rs6576081   | C | T | C | T | 0.130  | 0.013  | 0.018 | 0.472 | Interferon gamma levels | 0.000 | 0.026 | 25.409 |
| rs7280      | A | G | A | G | 0.293  | 0.129  | 0.052 | 0.012 | Interferon gamma levels | 0.000 | 0.060 | 23.542 |
| rs9271367   | A | G | A | G | 0.126  | -0.019 | 0.016 | 0.254 | Interferon gamma levels | 0.000 | 0.025 | 25.069 |
| rs9635812   | A | G | A | G | -0.133 | 0.005  | 0.018 | 0.775 | Interferon gamma levels | 0.000 | 0.028 | 22.732 |

|                     |   |   |   |   |        |        |       |       |                                             |       |       |        |
|---------------------|---|---|---|---|--------|--------|-------|-------|---------------------------------------------|-------|-------|--------|
| rs984<br>2794       | T | G | T | G | 0.116  | 0.022  | 0.016 | 0.163 | Interferon gamma<br>levels                  | 0.000 | 0.025 | 21.947 |
| rs100<br>3543<br>2  | A | G | A | G | 0.192  | 0.017  | 0.036 | 0.637 | Growth-regulated<br>protein alpha<br>levels | 0.000 | 0.035 | 30.568 |
| rs107<br>5549<br>0  | G | A | G | A | 0.113  | 0.029  | 0.025 | 0.235 | Growth-regulated<br>protein alpha<br>levels | 0.000 | 0.025 | 20.983 |
| rs108<br>4750<br>6  | T | C | T | C | 0.143  | 0.014  | 0.030 | 0.643 | Growth-regulated<br>protein alpha<br>levels | 0.000 | 0.031 | 20.856 |
| rs114<br>4348<br>04 | G | T | G | T | 0.320  | 0.147  | 0.071 | 0.038 | Growth-regulated<br>protein alpha<br>levels | 0.000 | 0.070 | 21.218 |
| rs115<br>3438<br>10 | G | A | G | A | 0.509  | 0.088  | 0.117 | 0.455 | Growth-regulated<br>protein alpha<br>levels | 0.000 | 0.077 | 43.169 |
| rs115<br>4284<br>18 | T | C | T | C | -0.341 | -0.060 | 0.071 | 0.424 | Growth-regulated<br>protein alpha<br>levels | 0.000 | 0.066 | 27.047 |
| rs116<br>1808<br>34 | A | G | A | G | 0.430  | 0.059  | 0.098 | 0.546 | Growth-regulated<br>protein alpha<br>levels | 0.000 | 0.081 | 28.240 |
| rs116<br>7432<br>28 | C | T | C | T | 0.472  | 0.074  | 0.063 | 0.236 | Growth-regulated<br>protein alpha<br>levels | 0.000 | 0.055 | 74.686 |

|                     |   |   |   |   |        |        |       |       |                                             |       |       |        |
|---------------------|---|---|---|---|--------|--------|-------|-------|---------------------------------------------|-------|-------|--------|
| rs125<br>3240<br>8  | A | G | A | G | 0.245  | -0.015 | 0.053 | 0.793 | Growth-regulated<br>protein alpha<br>levels | 0.000 | 0.049 | 24.910 |
| rs147<br>8390<br>99 | G | A | G | A | 0.327  | 0.009  | 0.063 | 0.886 | Growth-regulated<br>protein alpha<br>levels | 0.000 | 0.053 | 37.633 |
| rs180<br>8413<br>91 | T | G | T | G | 0.363  | -0.060 | 0.076 | 0.408 | Growth-regulated<br>protein alpha<br>levels | 0.000 | 0.076 | 22.971 |
| rs209<br>9700       | A | G | A | G | 0.180  | -0.074 | 0.042 | 0.076 | Growth-regulated<br>protein alpha<br>levels | 0.000 | 0.039 | 21.283 |
| rs472<br>6575       | G | T | G | T | 0.167  | 0.014  | 0.025 | 0.585 | Growth-regulated<br>protein alpha<br>levels | 0.000 | 0.026 | 42.174 |
| rs645<br>3912       | T | C | T | C | 0.123  | -0.015 | 0.026 | 0.571 | Growth-regulated<br>protein alpha<br>levels | 0.000 | 0.025 | 24.178 |
| rs650<br>1457       | T | C | T | C | -0.126 | 0.007  | 0.028 | 0.803 | Growth-regulated<br>protein alpha<br>levels | 0.000 | 0.027 | 21.665 |
| rs657<br>6081       | C | T | C | T | 0.130  | 0.022  | 0.026 | 0.393 | Growth-regulated<br>protein alpha<br>levels | 0.000 | 0.026 | 25.409 |
| rs728<br>1583       | A | G | A | G | 0.293  | 0.065  | 0.080 | 0.407 | Growth-regulated<br>protein alpha           | 0.000 | 0.060 | 23.542 |

|                     |   |   |   |   |        |        |       |       |  |                                                     |       |       |        |
|---------------------|---|---|---|---|--------|--------|-------|-------|--|-----------------------------------------------------|-------|-------|--------|
| 0                   |   |   |   |   |        |        |       |       |  | levels                                              |       |       |        |
| rs927<br>1367       | A | G | A | G | 0.126  | -0.051 | 0.024 | 0.033 |  | Growth-regulated<br>protein alpha<br>levels         | 0.000 | 0.025 | 25.069 |
| rs963<br>5812       | A | G | A | G | -0.133 | 0.002  | 0.026 | 0.933 |  | Growth-regulated<br>protein alpha<br>levels         | 0.000 | 0.028 | 22.732 |
| rs984<br>2794       | T | G | T | G | 0.116  | 0.000  | 0.024 | 0.993 |  | Growth-regulated<br>protein alpha<br>levels         | 0.000 | 0.025 | 21.947 |
| rs100<br>3543<br>2  | A | G | A | G | 0.192  | 0.021  | 0.024 | 0.408 |  | Granulocyte-colon<br>y stimulating factor<br>levels | 0.000 | 0.035 | 30.568 |
| rs107<br>5549<br>0  | G | A | G | A | 0.113  | 0.021  | 0.016 | 0.215 |  | Granulocyte-colon<br>y stimulating factor<br>levels | 0.000 | 0.025 | 20.983 |
| rs108<br>4750<br>6  | T | C | T | C | 0.143  | -0.020 | 0.020 | 0.317 |  | Granulocyte-colon<br>y stimulating factor<br>levels | 0.000 | 0.031 | 20.856 |
| rs114<br>4348<br>04 | G | T | G | T | 0.320  | 0.029  | 0.047 | 0.519 |  | Granulocyte-colon<br>y stimulating factor<br>levels | 0.000 | 0.070 | 21.218 |
| rs115<br>3438<br>10 | G | A | G | A | 0.509  | 0.144  | 0.076 | 0.057 |  | Granulocyte-colon<br>y stimulating factor<br>levels | 0.000 | 0.077 | 43.169 |
| rs115               | T | C | T | C | -0.341 | 0.039  | 0.047 | 0.400 |  | Granulocyte-colon                                   | 0.000 | 0.066 | 27.047 |

|           |   |   |   |   |       |        |       |       |  |                                              |       |       |        |
|-----------|---|---|---|---|-------|--------|-------|-------|--|----------------------------------------------|-------|-------|--------|
| 4284      |   |   |   |   |       |        |       |       |  | y stimulating factor levels                  |       |       |        |
| 18        |   |   |   |   |       |        |       |       |  | Granulocyte-colony stimulating factor levels |       |       |        |
| rs1161808 | A | G | A | G | 0.430 | 0.031  | 0.067 | 0.644 |  | y stimulating factor levels                  | 0.000 | 0.081 | 28.240 |
| 34        |   |   |   |   |       |        |       |       |  | Granulocyte-colony stimulating factor levels |       |       |        |
| rs1167432 | C | T | C | T | 0.472 | 0.039  | 0.045 | 0.373 |  | y stimulating factor levels                  | 0.000 | 0.055 | 74.686 |
| 28        |   |   |   |   |       |        |       |       |  | Granulocyte-colony stimulating factor levels |       |       |        |
| rs1253240 | A | G | A | G | 0.245 | -0.002 | 0.035 | 0.960 |  | y stimulating factor levels                  | 0.000 | 0.049 | 24.910 |
| 8         |   |   |   |   |       |        |       |       |  | Granulocyte-colony stimulating factor levels |       |       |        |
| rs1478390 | G | A | G | A | 0.327 | 0.082  | 0.042 | 0.055 |  | y stimulating factor levels                  | 0.000 | 0.053 | 37.633 |
| 99        |   |   |   |   |       |        |       |       |  | Granulocyte-colony stimulating factor levels |       |       |        |
| rs1808413 | T | G | T | G | 0.363 | 0.016  | 0.051 | 0.764 |  | y stimulating factor levels                  | 0.000 | 0.076 | 22.971 |
| 91        |   |   |   |   |       |        |       |       |  | Granulocyte-colony stimulating factor levels |       |       |        |
| rs2099700 | A | G | A | G | 0.180 | -0.026 | 0.028 | 0.357 |  | y stimulating factor levels                  | 0.000 | 0.039 | 21.283 |
|           |   |   |   |   |       |        |       |       |  | Granulocyte-colony stimulating factor levels |       |       |        |
| rs4726575 | G | T | G | T | 0.167 | -0.018 | 0.016 | 0.275 |  | y stimulating factor levels                  | 0.000 | 0.026 | 42.174 |
|           |   |   |   |   |       |        |       |       |  | Granulocyte-colony stimulating factor levels |       |       |        |
| rs6453912 | T | C | T | C | 0.123 | -0.019 | 0.017 | 0.264 |  | y stimulating factor levels                  | 0.000 | 0.025 | 24.178 |

|                    |   |   |   |   |        |        |       |       |                                              |       |       |        |
|--------------------|---|---|---|---|--------|--------|-------|-------|----------------------------------------------|-------|-------|--------|
| rs650<br>1457      | T | C | T | C | -0.126 | 0.025  | 0.019 | 0.189 | Granulocyte-colony stimulating factor levels | 0.000 | 0.027 | 21.665 |
| rs657<br>6081      | C | T | C | T | 0.130  | 0.045  | 0.018 | 0.010 | Granulocyte-colony stimulating factor levels | 0.000 | 0.026 | 25.409 |
| rs728<br>1583<br>0 | A | G | A | G | 0.293  | 0.116  | 0.050 | 0.018 | Granulocyte-colony stimulating factor levels | 0.000 | 0.060 | 23.542 |
| rs927<br>1367      | A | G | A | G | 0.126  | 0.006  | 0.016 | 0.704 | Granulocyte-colony stimulating factor levels | 0.000 | 0.025 | 25.069 |
| rs963<br>5812      | A | G | A | G | -0.133 | -0.005 | 0.018 | 0.790 | Granulocyte-colony stimulating factor levels | 0.000 | 0.028 | 22.732 |
| rs984<br>2794      | T | G | T | G | 0.116  | -0.014 | 0.016 | 0.377 | Granulocyte-colony stimulating factor levels | 0.000 | 0.025 | 21.947 |
| rs100<br>3543<br>2 | A | G | A | G | 0.192  | 0.021  | 0.025 | 0.424 | Fibroblast growth factor basic levels        | 0.000 | 0.035 | 30.568 |
| rs107<br>5549<br>0 | G | A | G | A | 0.113  | 0.033  | 0.017 | 0.049 | Fibroblast growth factor basic levels        | 0.000 | 0.025 | 20.983 |
| rs108<br>4750      | T | C | T | C | 0.143  | 0.006  | 0.021 | 0.752 | Fibroblast growth factor basic levels        | 0.000 | 0.031 | 20.856 |



|       |   |   |   |   |        |        |       |       |                                       |       |       |        |  |
|-------|---|---|---|---|--------|--------|-------|-------|---------------------------------------|-------|-------|--------|--|
| 6     |   |   |   |   |        |        |       |       |                                       |       |       |        |  |
| rs114 |   |   |   |   |        |        |       |       |                                       |       |       |        |  |
| 4348  | G | T | G | T | 0.320  | -0.002 | 0.047 | 0.969 | Fibroblast growth factor basic levels | 0.000 | 0.070 | 21.218 |  |
| 04    |   |   |   |   |        |        |       |       |                                       |       |       |        |  |
| rs115 |   |   |   |   |        |        |       |       |                                       |       |       |        |  |
| 3438  | G | A | G | A | 0.509  | -0.005 | 0.077 | 0.920 | Fibroblast growth factor basic levels | 0.000 | 0.077 | 43.169 |  |
| 10    |   |   |   |   |        |        |       |       |                                       |       |       |        |  |
| rs115 |   |   |   |   |        |        |       |       |                                       |       |       |        |  |
| 4284  | T | C | T | C | -0.341 | 0.023  | 0.047 | 0.600 | Fibroblast growth factor basic levels | 0.000 | 0.066 | 27.047 |  |
| 18    |   |   |   |   |        |        |       |       |                                       |       |       |        |  |
| rs116 |   |   |   |   |        |        |       |       |                                       |       |       |        |  |
| 1808  | A | G | A | G | 0.430  | -0.020 | 0.068 | 0.777 | Fibroblast growth factor basic levels | 0.000 | 0.081 | 28.240 |  |
| 34    |   |   |   |   |        |        |       |       |                                       |       |       |        |  |
| rs116 |   |   |   |   |        |        |       |       |                                       |       |       |        |  |
| 7432  | C | T | C | T | 0.472  | -0.031 | 0.045 | 0.502 | Fibroblast growth factor basic levels | 0.000 | 0.055 | 74.686 |  |
| 28    |   |   |   |   |        |        |       |       |                                       |       |       |        |  |
| rs125 |   |   |   |   |        |        |       |       |                                       |       |       |        |  |
| 3240  | A | G | A | G | 0.245  | 0.003  | 0.036 | 0.934 | Fibroblast growth factor basic levels | 0.000 | 0.049 | 24.910 |  |
| 8     |   |   |   |   |        |        |       |       |                                       |       |       |        |  |
| rs147 |   |   |   |   |        |        |       |       |                                       |       |       |        |  |
| 8390  | G | A | G | A | 0.327  | 0.053  | 0.043 | 0.228 | Fibroblast growth factor basic levels | 0.000 | 0.053 | 37.633 |  |
| 99    |   |   |   |   |        |        |       |       |                                       |       |       |        |  |
| rs180 |   |   |   |   |        |        |       |       |                                       |       |       |        |  |
| 8413  | T | G | T | G | 0.363  | -0.048 | 0.052 | 0.340 | Fibroblast growth factor basic levels | 0.000 | 0.076 | 22.971 |  |
| 91    |   |   |   |   |        |        |       |       |                                       |       |       |        |  |
| rs209 | A | G | A | G | 0.180  | -0.005 | 0.028 | 0.860 | Fibroblast growth                     | 0.000 | 0.039 | 21.283 |  |

|           |   |   |   |   |        |        |       |       |  |                                       |       |       |        |
|-----------|---|---|---|---|--------|--------|-------|-------|--|---------------------------------------|-------|-------|--------|
| 9700      |   |   |   |   |        |        |       |       |  | factor basic levels                   |       |       |        |
| rs4726575 | G | T | G | T | 0.167  | 0.012  | 0.017 | 0.487 |  | Fibroblast growth factor basic levels | 0.000 | 0.026 | 42.174 |
| rs6453912 | T | C | T | C | 0.123  | -0.015 | 0.018 | 0.396 |  | Fibroblast growth factor basic levels | 0.000 | 0.025 | 24.178 |
| rs6501457 | T | C | T | C | -0.126 | -0.006 | 0.019 | 0.766 |  | Fibroblast growth factor basic levels | 0.000 | 0.027 | 21.665 |
| rs6576081 | C | T | C | T | 0.130  | 0.046  | 0.018 | 0.011 |  | Fibroblast growth factor basic levels | 0.000 | 0.026 | 25.409 |
| rs7281583 | A | G | A | G | 0.293  | 0.077  | 0.051 | 0.110 |  | Fibroblast growth factor basic levels | 0.000 | 0.060 | 23.542 |
| 0         |   |   |   |   |        |        |       |       |  |                                       |       |       |        |
| rs9271367 | A | G | A | G | 0.126  | -0.008 | 0.016 | 0.621 |  | Fibroblast growth factor basic levels | 0.000 | 0.025 | 25.069 |
| rs9635812 | A | G | A | G | -0.133 | 0.002  | 0.018 | 0.910 |  | Fibroblast growth factor basic levels | 0.000 | 0.028 | 22.732 |
| rs9842794 | T | G | T | G | 0.116  | 0.018  | 0.016 | 0.267 |  | Fibroblast growth factor basic levels | 0.000 | 0.025 | 21.947 |
| rs1003543 | A | G | A | G | 0.192  | -0.004 | 0.024 | 0.878 |  | Eotaxin levels                        | 0.000 | 0.035 | 30.568 |
| 2         |   |   |   |   |        |        |       |       |  |                                       |       |       |        |
| rs1075549 | G | A | G | A | 0.113  | -0.009 | 0.016 | 0.595 |  | Eotaxin levels                        | 0.000 | 0.025 | 20.983 |
| 0         |   |   |   |   |        |        |       |       |  |                                       |       |       |        |
| rs1084750 | T | C | T | C | 0.143  | 0.011  | 0.020 | 0.563 |  | Eotaxin levels                        | 0.000 | 0.031 | 20.856 |

---

|                          |   |   |   |   |        |        |       |       |                |       |       |        |
|--------------------------|---|---|---|---|--------|--------|-------|-------|----------------|-------|-------|--------|
| 6<br>rs114<br>4348<br>04 | G | T | G | T | 0.320  | 0.009  | 0.046 | 0.849 | Eotaxin levels | 0.000 | 0.070 | 21.218 |
| rs115<br>3438<br>10      | G | A | G | A | 0.509  | -0.038 | 0.077 | 0.618 | Eotaxin levels | 0.000 | 0.077 | 43.169 |
| rs115<br>4284<br>18      | T | C | T | C | -0.341 | -0.023 | 0.046 | 0.624 | Eotaxin levels | 0.000 | 0.066 | 27.047 |
| rs116<br>1808<br>34      | A | G | A | G | 0.430  | 0.034  | 0.066 | 0.627 | Eotaxin levels | 0.000 | 0.081 | 28.240 |
| rs116<br>7432<br>28      | C | T | C | T | 0.472  | -0.034 | 0.044 | 0.445 | Eotaxin levels | 0.000 | 0.055 | 74.686 |
| rs125<br>3240<br>8       | A | G | A | G | 0.245  | -0.038 | 0.035 | 0.292 | Eotaxin levels | 0.000 | 0.049 | 24.910 |
| rs147<br>8390<br>99      | G | A | G | A | 0.327  | 0.030  | 0.042 | 0.491 | Eotaxin levels | 0.000 | 0.053 | 37.633 |
| rs180<br>8413<br>91      | T | G | T | G | 0.363  | -0.011 | 0.051 | 0.786 | Eotaxin levels | 0.000 | 0.076 | 22.971 |
| rs191                    | T | C | T | C | 0.651  | -0.038 | 0.084 | 0.659 | Eotaxin levels | 0.000 | 0.068 | 91.635 |

---

---

|                             |   |   |   |   |        |        |       |       |                |       |       |        |
|-----------------------------|---|---|---|---|--------|--------|-------|-------|----------------|-------|-------|--------|
| 0413<br>65<br>rs209<br>9700 | A | G | A | G | 0.180  | 0.009  | 0.027 | 0.736 | Eotaxin levels | 0.000 | 0.039 | 21.283 |
| rs472<br>6575               | G | T | G | T | 0.167  | -0.004 | 0.016 | 0.817 | Eotaxin levels | 0.000 | 0.026 | 42.174 |
| rs645<br>3912               | T | C | T | C | 0.123  | -0.026 | 0.017 | 0.129 | Eotaxin levels | 0.000 | 0.025 | 24.178 |
| rs650<br>1457               | T | C | T | C | -0.126 | -0.004 | 0.019 | 0.841 | Eotaxin levels | 0.000 | 0.027 | 21.665 |
| rs657<br>6081               | C | T | C | T | 0.130  | 0.008  | 0.017 | 0.616 | Eotaxin levels | 0.000 | 0.026 | 25.409 |
| rs728<br>1583<br>0          | A | G | A | G | 0.293  | 0.011  | 0.050 | 0.806 | Eotaxin levels | 0.000 | 0.060 | 23.542 |
| rs927<br>1367               | A | G | A | G | 0.126  | -0.001 | 0.016 | 0.953 | Eotaxin levels | 0.000 | 0.025 | 25.069 |
| rs963<br>5812               | A | G | A | G | -0.133 | 0.029  | 0.017 | 0.097 | Eotaxin levels | 0.000 | 0.028 | 22.732 |
| rs984<br>2794               | T | G | T | G | 0.116  | -0.028 | 0.016 | 0.079 | Eotaxin levels | 0.000 | 0.025 | 21.947 |

---

**Supplementary Table S2.** Sensitivity analysis of Mendelian randomization of AP and ARDS.

| Exposure | Outcome          | Cochran's Q test |         | Horizontal pleiotropy |         | MR-PRESSO |         |
|----------|------------------|------------------|---------|-----------------------|---------|-----------|---------|
|          |                  | I <sup>2</sup>   | P-value | Egger intercept       | P-value | P-value   | Outlier |
| AAP      | ARDS             | 0                | 0.918   | 0.061                 | 0.232   | 0.948     | 0       |
|          | Pleural effusion | 0                | 0.583   | -0.001                | 0.922   | 0.604     | 0       |
|          | Pulmonary edema  | 0                | 0.875   | -0.022                | 0.610   | 9.941     | 0       |
| AP       | ARDS             | 0                | 0.842   | 0.048                 | 0.392   | 0.893     | 0       |
|          | Pleural effusion | 27.01%           | 0.140   | 0.037                 | 0.035   | 0.257     | 0       |
|          | Pulmonary edema  | 30.61%           | 0.101   | -0.035                | 0.538   | 0.200     | 0       |

Note: In the Egger intercept test for AP and Pleural effusion causal analysis, the P-value is less than 0.05, suggesting that the above single analysis is not credible. Given that the analysis was negative, we highlighted this in the supplement without describing the result in the main text.

**Supplementary Table S3.** Sensitivity analysis of Mendelian randomization of AP and cytokine.

| Exposure | Outcome                                     | Cochran's Q test |         | Horizontal pleiotropy |         | MR-PRESSO |         |
|----------|---------------------------------------------|------------------|---------|-----------------------|---------|-----------|---------|
|          |                                             | I <sup>2</sup>   | P-value | Egger intercept       | P-value | P-value   | Outlier |
| AP       | Platelet-derived growth factor BB levels    | 0                | 0.615   | 0.001                 | 0.963   | 0.72      | 0       |
|          | Interleukin-12p70 levels                    | 0                | 0.802   | 0.004                 | 0.775   | 0.502     | 0       |
|          | Interleukin-10 levels                       | 0                | 0.983   | -0.001                | 0.935   | 0.747     | 0       |
|          | Interleukin-1-beta levels                   | 25.69%           | 0.165   | -0.008                | 0.683   | 0.626     | 0       |
|          | Interleukin-5 levels                        | 0                | 0.638   | 0.005                 | 0.809   | 0.252     | 0       |
|          | Interleukin-4 levels                        | 0                | 0.529   | 0.009                 | 0.484   | 0.138     | 0       |
|          | Fibroblast growth factor basic levels       | 0                | 0.593   | 0.010                 | 0.442   | 0.523     | 0       |
|          | Stem cell growth factor beta levels         | 0                | 0.533   | 0.005                 | 0.806   | 0.656     | 0       |
|          | Monokine induced by gamma interferon levels | 0                | 0.538   | -0.016                | 0.383   | 0.529     | 0       |
|          | Interleukin-12p70 levels                    | 6.42%            | 0.376   | -0.009                | 0.467   | 0.502     | 0       |
| AAP      | Interleukin-10 levels                       | 0                | 0.782   | -0.011                | 0.383   | 0.762     | 0       |
|          | Interleukin-8 levels                        | 15.27%           | 0.264   | -0.028                | 0.170   | 0.267     | 0       |
|          | Interleukin-1-beta levels                   | 0                | 0.862   | -0.016                | 0.269   | 0.894     | 0       |
|          |                                             |                  |         |                       |         |           |         |

After excluding 10 patients, this study included 321 eligible subjects aged 19-98 years old, with an average age of  $54.44 \pm 17.51$  years old, 222 were male (69.16%), and 99 were women (30.84%). Among them, 133 patients were in the CON group (41.43%), 145 patients were in the QYKL group (45.17%), and 43 patients were in the Q&D group (13.40%). The other general demographic characteristics of the patients are described in **Supplementary Tables S4**. Among them, idiopathic etiology refers to the fact that many patients with AP cannot be diagnosed with a cause after clinical, imaging, and biochemical examinations. Therefore, it is called "idiopathic AP." With in-depth research, the popularization of endoscopic ultrasonography, and other technologies, the idiopathic cause can be identified as nothing more than micro calculi, pancreatic division, and Oddi sphincter disorder. This etiology still occupies a large proportion of the population.

**Supplementary Tables S4.** Description of general demographic characteristics.

| <b>Variation</b>               | <b><i>N (%) / <math>\bar{x} \pm s</math></i></b> |
|--------------------------------|--------------------------------------------------|
| <b>Age</b>                     | 54.44 ± 17.51                                    |
| <b>Gender</b>                  |                                                  |
| Male                           | 222 (69.16%)                                     |
| Female                         | 99 (30.84%)                                      |
| <b>Nationality</b>             |                                                  |
| Han Nationality                | 303 (94.4%)                                      |
| Manchu                         | 12 (3.7%)                                        |
| Mongolian                      | 3 (0.9%)                                         |
| Korean                         | 2 (0.6%)                                         |
| Ewenki                         | 1 (0.3%)                                         |
| <b>Respiratory</b>             | 17.99 ± 2.53                                     |
| <b>Rate-Admission</b>          |                                                  |
| <b>Temperature-Admission</b>   | 36.44 ± 0.67                                     |
| <b>Pulse-Admission</b>         | 83.33 ± 15.71                                    |
| <b>Surgery History</b>         | 27 (8.4%)                                        |
| <b>Etiology</b>                |                                                  |
| Biliary                        | 98 (30.5%)                                       |
| Alcoholic                      | 29 (9.0%)                                        |
| Hyperlipidemia                 | 65 (20.2%)                                       |
| Idiopathic                     | 129 (40.2%)                                      |
| <b>Severity Classification</b> |                                                  |
| Severe AP                      | 15 (4.7%)                                        |

The average age of the three groups was 59.68 ± 17.82 years old, 50.07 ± 16.65 years old, and 52.98 ± 15.22 years old, respectively,  $P < 0.05$ . Male patients accounted for 62.4%, 71.7%, and 81.4%, respectively,  $P = 0.043$ . The etiology classification is relatively scattered. In the CON group, 65 patients (48.9%) had a cholestatic origin, 14 patients (10.5%) had alcoholic liver disease, and 10 patients (7.5%) had hyperlipidemia. In the QYKL group, there were 24 patients (16.6%) with a cholestatic origin, 14 patients (9.7%) with alcohol-induced liver disease, and 41 patients (28.3%) with hyperlipidemia. In the Q&D group, 9 patients (20.9%) had cholestatic origin, 1 patient (2.3%) had alcohol-induced liver disease, and 14 patients (32.6%) had hyperlipidemia,  $P < 0.001$ . The ethnic distribution was associated with a  $P > 0.05$ , or no difference. There were 6 (4.5%), 7 (4.8%), and 2 (4.7%) patients of severe AP in each of the three groups in terms of severity classification,  $P > 0.05$ . The normal patients' respiratory rates ranged from 12~20 beats/min. Considering these two values did not cause significant bias in the outcome, only age, sex, and etiology were included in the GPSW; see **Supplementary Tables S5**.

**Supplementary Tables S5.** Comparison of the general demographic characteristics of the three groups of patients.

| Variation          | CON group (N = 133) | QYKL group (N = 145) | Q&D group (N = 43) | $F/x^2$ | $P$ Value |
|--------------------|---------------------|----------------------|--------------------|---------|-----------|
| <b>Age</b>         | 59.68 ± 17.82       | 50.07 ± 16.65        | 52.98 ± 15.22      | 11.3036 | <0.001    |
| <b>Gender</b>      | 83 (62.4%)          | 104 (71.7%)          | 35 (81.4%)         | 6.3094  | 0.043     |
| <b>Nationality</b> |                     |                      |                    | -       | 0.582     |
| Han Nationality    | 125 (94.0%)         | 139 (95.9%)          | 39 (90.7%)         |         |           |
| Manchu             | 6 (4.5%)            | 3 (2.1%)             | 3 (7.0%)           |         |           |
| Mongolian          | 1 (0.8%)            | 1 (0.7%)             | 1 (2.3%)           |         |           |



|                                   |               |               |               |         |        |
|-----------------------------------|---------------|---------------|---------------|---------|--------|
| Korean                            | 1 (0.8 %)     | 1 (0.7 %)     | 0 (0.0 %)     |         |        |
| Ewenki                            | 0 (0.0 %)     | 1 (0.7 %)     | 0 (0.0 %)     |         |        |
| <b>Respiratory Rate-Admission</b> | 18.72 ± 3.13  | 17.45 ± 1.88  | 17.52 ± 1.66  | 10.0453 | 0.001  |
| <b>Temperature-Admission</b>      | 36.53 ± 0.74  | 36.35 ± 0.56  | 36.49 ± 0.75  | 2.637   | 0.73   |
| <b>Pulse-Admission</b>            | 84.77 ± 17.41 | 81.61 ± 14.02 | 84.63 ± 15.16 | 1.55938 | 0.212  |
| <b>Surgery History</b>            | 16 (12.4 %)   | 7 (4.8 %)     | 4 (9.3 %)     | 5.0673  | 0.079  |
| <b>Etiology</b>                   |               |               |               | 49.108  | <0.001 |
| Biliary                           | 65 (48.9 %)   | 24 (16.6 %)   | 9 (20.9 %)    |         |        |
| Alcoholic                         | 14 (10.5 %)   | 14 (9.7 %)    | 1 (2.3 %)     |         |        |
| Hyperlipidemia                    | 10 (7.5 %)    | 41 (28.3 %)   | 14 (32.6 %)   |         |        |
| Idiopathic                        | 44 (33.1 %)   | 66 (45.5 %)   | 19 (44.2 %)   |         |        |
| <b>Severity Classification</b>    |               |               |               |         |        |
| Severe AP                         | 6 (4.5 %)     | 7 (4.8 %)     | 2 (4.7 %)     | 0.01563 | 0.99   |

In the comparison of the symptoms on admission, the number of patients who had nausea and vomiting was 97 patients (72.9%) in the CON group, 100 patients (69.0%) in the QYKL group, and 29 patients (67.4%) in the Q&D group,  $P > 0.05$ ; see **Supplementary Tables S6** below.

**Supplementary Tables S6.** Comparison of the physical signs of the three groups of patients on admission.

| Variation                        | CON group<br>( <i>N</i> = 133) | QYKL group<br>( <i>N</i> = 145) | Q&D group<br>( <i>N</i> = 43) | $\chi^2$ | <i>P</i> Value |
|----------------------------------|--------------------------------|---------------------------------|-------------------------------|----------|----------------|
| Nausea and vomiting on admission | 97 (72.9)                      | 100 (69.0)                      | 29 (67.4)                     | 0.73311  | 0.693          |

Since this study is a retrospective study and no uniform baseline information was obtained in the statistical data, after combining the comparison of the above three groups of baseline characteristics and related clinical background, the variables that had differences in the baselines between groups or that had an impact on patient prognosis based on clinical considerations were included in the generalized propensity score weighted model. Individuals with poorly balanced covariate distribution between the groups are given relatively less weight. Individuals with a higher covariate balance between the groups are given a relatively larger weight. This way, a pseudo population with a better balance of covariates between the groups is constructed based on the original population, and the influence of the uneven distribution of internal confounding factors between the groups on the effect value is eliminated. Therefore, the differences in related efficacy and safety indicators between the groups based on the pseudo population are further estimated. Before and after the generalized propensity score is weighted, the maximum standardized mean difference between the groups is less than 0.1, reaching a balanced state. See **Supplementary Tables S7**.

**Supplementary Tables S7.** The largest standardized mean difference between the weighted pre- and postgroups of the generalized propensity score.

| <b>Variables</b> | <b>Type</b> | <b>Max Difference Unadjusted</b> | <b>Max Difference Adjusted</b> | <b>Balance d</b> | <b>Threshold</b> |
|------------------|-------------|----------------------------------|--------------------------------|------------------|------------------|
| Age              | continuous  | 0.539                            | 0.047                          | Yes              | <0.1             |
| Gender           | Binary      | 0.190                            | 0.135                          | Note             | >0.1             |
| Etiology 1       | Binary      | 0.323                            | 0.042                          | Yes              | <0.1             |
| Etiology 2       | Binary      | 0.082                            | 0.011                          | Yes              | <0.1             |
| Etiology 3       | Binary      | 0.250                            | 0.029                          | Yes              | <0.1             |
| Etiology 4       | Binary      | 0.124                            | 0.009                          | Yes              | <0.1             |

Note: Max Difference Unadjusted: max standardized mean difference (SMD) before weighting; Max Difference Adjusted: max SMD after weighting; SMD between pre-defined covariates and treatments were calculated before and after the generalized propensity

score weighting (GPSW). An average SMD less than 0.1 indicated balanced covariates (Austin, 2019). The adjusted max SMD for gender is 0.135; although this value is above 0.1, the average max SMD of all the covariates is still less than 0.1.

**Supplementary Table S8.** Comparison of main efficacy indicators.

| Pre-calibration                              |            | After calibration |       |         |         | OR               |
|----------------------------------------------|------------|-------------------|-------|---------|---------|------------------|
| Group                                        | case (%)   | Estimate          | Error | Z value | P value |                  |
| <b><i>Occurrence of ALI/ARDS</i></b>         |            |                   |       |         |         |                  |
| CON group                                    | 10 (7.5%)  |                   |       |         |         | <b>reference</b> |
| QYKL group                                   | 3 (2.1%)   | -1.403            | 0.709 | -1.979  | 0.048   | 0.25             |
| Q&D group                                    | 1 (2.3%)   | -1.659            | 0.813 | -2.040  | 0.041   | 0.19             |
| <b><i>Occurrence of pleural effusion</i></b> |            |                   |       |         |         |                  |
| CON group                                    | 55 (41.4%) |                   |       |         |         | <b>reference</b> |
| QYKL group                                   | 24 (16.6%) | -0.564            | 0.261 | -2.162  | 0.031   | 0.57             |
| Q&D group                                    | 7 (16.3%)  | -0.851            | 0.279 | -3.054  | 0.002   | 0.43             |

**Supplementary Table S9.** Comparison of the values of change in the duration of abdominal pain and bloating after admission in three groups of patients.

| Group                                          | Pre-calibration                              | After calibration |           |                |                |
|------------------------------------------------|----------------------------------------------|-------------------|-----------|----------------|----------------|
|                                                | Average length of time ( $\bar{x} \pm s$ ) d | Beta              | Error     | <i>T</i> value | <i>P</i> value |
| <b><i>Duration of abdominal pain</i></b>       |                                              |                   |           |                |                |
| CON group                                      | 8.25±6.42                                    |                   | reference |                |                |
| QYKL group                                     | 5.94±3.62                                    | -2.421            | 0.683     | -3.545         | <0.001         |
| Q&D group                                      | 6.69±5.08                                    | -1.849            | 0.707     | -2.616         | 0.009          |
| <b><i>Duration of abdominal distension</i></b> |                                              |                   |           |                |                |
| CON group                                      | 4.64±6.15                                    |                   | reference |                |                |
| QYKL group                                     | 1.93±3.21                                    | -2.808            | 0.576     | -4.875         | <0.001         |
| Q&D group                                      | 1.62±2.87                                    | -3.461            | 0.587     | -5.891         | <0.001         |

**Supplementary Table S10.** Comparison of the occurrence of abnormal bowel sounds in the three groups of patients.

| Pre-calibration |            | After calibration |       |           |         |       |
|-----------------|------------|-------------------|-------|-----------|---------|-------|
| Group           | case (%)   | Estimate          | Error | Z value   | P value | OR    |
| CON 组           | 40 (30.1%) |                   |       | reference |         |       |
| QYKL 组          | 5 (3.4%)   | -2.709            | 0.562 | -4.821    | <0.001  | 0.067 |
| Q&D 组           | 1 (2.3%)   | -2.257            | 0.487 | -4.635    | <0.001  | 0.105 |

**Supplementary Table S11.** Differences in the laboratory indexes of the three groups of patients.

| Group                             | Pre-calibration                   | After calibration |           |         | P value |
|-----------------------------------|-----------------------------------|-------------------|-----------|---------|---------|
|                                   | Reduced value ( $\bar{x} \pm s$ ) | Beta              | Error     | Z value |         |
| <b><i>Amy reduced value</i></b>   |                                   |                   |           |         |         |
| CON group                         | 396. 28±637. 79 U/L               |                   | reference |         |         |
| QYKL group                        | 234. 71±575. 77 U/L               | 87. 80            | 103. 84   | 0. 846  | 0. 399  |
| Q&D group                         | 328. 82±650. 33 U/L               | -76. 89           | 102. 32   | -0. 751 | 0. 453  |
| <b><i>Lps reduced value</i></b>   |                                   |                   |           |         |         |
| CON group                         | 1, 121. 32±2, 174. 47 U/L         |                   | reference |         |         |
| QYKL group                        | 788. 02±1, 903. 02 U/L            | 162. 7            | 303. 9    | 0. 535  | 0. 593  |
| Q&D group                         | 939. 39±1, 601. 26 U/L            | -136. 7           | 291. 7    | -0. 469 | 0. 640  |
| <b><i>Neut# reduced value</i></b> |                                   |                   |           |         |         |
| CON group                         | (3. 55±4. 54) ×10 <sup>9</sup> /L |                   | reference |         |         |
| QYKL group                        | (3. 43±3. 35) ×10 <sup>9</sup> /L | 0. 3574           | 0. 5933   | 0. 602  | 0. 5475 |
| Q&D group                         | (4. 67±4. 53) ×10 <sup>9</sup> /L | -0. 9970          | 0. 5763   | -1. 730 | 0. 0848 |
| <b><i>WBC# reduced value</i></b>  |                                   |                   |           |         |         |
| CON group                         | (3. 28±4. 58) ×10 <sup>9</sup> /L |                   | reference |         |         |
| QYKL group                        | (3. 19±3. 47) ×10 <sup>9</sup> /L | 0. 3409           | 0. 5973   | 0. 571  | 0. 569  |
| Q&D group                         | (4. 15±4. 52) ×10 <sup>9</sup> /L | -0. 7297          | 0. 5803   | -1. 258 | 0. 210  |



**Supplementary Table S12.** Comparison of the three groups of patients admitted to the ICU and the use of mechanical ventilation.

| Group                              | Pre-calibration | After calibration |       |           |         | OR    |
|------------------------------------|-----------------|-------------------|-------|-----------|---------|-------|
|                                    | case (%)        | Estimate          | Error | Z value   | P value |       |
| <b>ICU occupancy rate</b>          |                 |                   |       |           |         |       |
| CON group                          | 25 (18.8%)      |                   |       | reference |         |       |
| QYKL group                         | 5 (3.4%)        | -1.773            | 0.507 | -3.495    | <0.001  | 0.170 |
| Q&D group                          | 2 (4.7%)        | -2.002            | 0.576 | -3.477    | <0.001  | 0.135 |
| <b>Ventilator utilization rate</b> |                 |                   |       |           |         |       |
| CON group                          | 11 (8.3%)       |                   |       | reference |         |       |
| QYKL group                         | 2 (1.4%)        | -2.069            | 0.883 | -2.343    | 0.019   | 0.126 |
| Q&D group                          | 1 (2.3%)        | -1.762            | 0.808 | -2.182    | 0.029   | 0.172 |

**Supplementary Table S13.** Comparison of economic indicators among the three groups of patients.

| Group                                   | Pre-calibration | After calibration |           |         |         |
|-----------------------------------------|-----------------|-------------------|-----------|---------|---------|
|                                         | $\bar{x} \pm s$ | Beta              | Error     | Z value | P value |
| <b><i>Length of hospitalization</i></b> |                 |                   |           |         |         |
| CON group                               | 13.23±7.53 d    |                   | reference |         |         |
| QYKL group                              | 9.28±4.29 d     | -3.7867           | 0.8305    | -4.560  | <0.001  |
| Q&D group                               | 10.77±6.69 d    | -2.4058           | 0.8495    | -2.832  | 0.005   |
| <b><i>ICU admission time</i></b>        |                 |                   |           |         |         |
| CON group                               | 1.48±4.58 d     |                   | reference |         |         |
| QYKL group                              | 0.21±1.21 d     | -1.2809           | 0.3821    | -3.352  | <0.001  |
| Q&D group                               | 0.30±1.39 d     | -1.2787           | 0.3909    | -3.272  | 0.001   |

Supplementary Table S14. 126 chemical constituents of QYKL extract.

| NameEN               | HerbSet | Class                         | CompositeScore | Formula   | mzmed       | rtmed    | ppm               | ms2Adduct | MS2                                     |
|----------------------|---------|-------------------------------|----------------|-----------|-------------|----------|-------------------|-----------|-----------------------------------------|
| Emodin               | ⑤       | Quinones                      | 1              | C15H10O5  | 269.0460831 | 440.101  | 0.308828052925866 | [M-H]     | 269.044;270.047;241.05;197.06;169.065   |
| Genistein            | ②       | Flavonoids                    | 1              | C15H10O5  | 269.0458396 | 289.218  | 0.596354321044295 | [M-H]-    | 269.044;270.047;241.051;223.039;197.06  |
| Chrysin              | ①②⑤     | Flavonoids                    | 1              | C15H10O4  | 253.0509071 | 359.371  | 0.366968670569439 | [M-H]     | 253.05;254.053;63.024;209.062;65.003    |
| Hederagenin          | ②⑥      | Terpenoids                    | 1              | C30H48O4  | 471.3481934 | 552.726  | 1.71118966874442  | [M-H]-    | 471.351;472.352;92.692;160.843;52.374   |
| Linoelaidic acid     | ①②③④⑦⑥  | Fatty Acyls                   | 1              | C18H32O2  | 279.2329319 | 749.7245 | 0.243930479711214 | [M-H]-    | 279.235;280.238;92.928;70.782;74.294    |
| Costunolide          | ⑦       | Sesquiterpenoids              | 1              | C15H20O2  | 231.1389574 | 507.768  | 0.184348317906747 | [M-H]-    | 231.141;232.144;213.128;50.39;95.435    |
| Methyl hexadecanoate | ①②⑥     | Fatty Acyls                   | 1              | C17H34O2  | 315.2545485 | 506.222  | 1.73978948952968  | [M+HCOO]  | 315.252;316.258;297.245;313.24;56.078   |
| Apigenin             | ①       | Flavonoids                    | 1              | C15H10O5  | 269.0455754 | 186.676  | 1.5780341241408   | [M-H]     | 269.044;270.047;241.05;251.035;169.065  |
| Baicalein            | ①⑥      | Flavonoids                    | 0.999999538    | C15H10O5  | 269.0460603 | 268.094  | 0.224258976125105 | [M-H]-    | 269.044;197.06;270.047;225.055;171.044  |
| Baicalin             | ①       | Flavonoids                    | 0.999998538    | C21H18O11 | 445.0775415 | 354.5725 | 3.27704034274214  | [M-H]     | 269.044;113.025;445.283;162.838;59.014  |
| Wogonin              | ①④      | Flavonoids                    | 0.999870077    | C16H12O5  | 285.0756393 | 399.2095 | 1.26543615920436  | [M+H]+    | 285.076;270.053;269.046;55.171;267.209  |
| Fumaric acid         | ③⑤      | Organic acids and derivatives | 0.999812308    | C4H4O4    | 115.00378   | 55.0071  | 1.91255463876598  | [M-H]     | 71.014;114.935;116.05;59.014;51.858     |
| Acacetin             | ①       | Flavonoids                    | 0.999804846    | C16H12O5  | 283.0616056 | 226.502  | 1.39318114546415  | [M-H]-    | 268.038;283.062;284.031;269.04;239.035  |
| Glycitein            | ⑦       | Flavonoids                    | 0.999734231    | C16H12O5  | 283.0616392 | 157.929  | 1.27472648737502  | [M-H]-    | 268.038;283.062;284.031;110.001;165.991 |
| Laxapur              | ⑤       | Quinones                      | 0.999724077    | C14H8O4   | 239.0352764 | 350.2295 | 1.15651043696881  | [M-H]-    | 183.046;239.036;257.044;211.04;229.052  |
| Choline              | ②       | Organonitrogen compounds      | 0.999580923    | C5H14NO   | 104.1068044 | 87.0121  | 1.87902189638406  | [M]+      | 104.106;60.081;105.069;79.054;58.065    |
| Kaempferol           | ②④⑥     | Flavonoids                    | 0.998835769    | C15H10O6  | 285.041064  | 167.92   | 0.224508420268003 | [M-H]-    | 285.041;241.05;117.035;286.044;240.044  |
| Maleic acid          | ③⑤      | Organic acids and derivatives | 0.997159769    | C4H4O4    | 115.0037621 | 31.1671  | 2.06864441356267  | [M-H]-    | 71.014;115.003;72.017;116.072;59.014    |

|                       |    |                               |             |            |             |          |                    |         |                                         |
|-----------------------|----|-------------------------------|-------------|------------|-------------|----------|--------------------|---------|-----------------------------------------|
|                       |    | derivatives                   |             |            |             |          |                    |         |                                         |
| Saikosaponin BK1      | ④  | Terpenoids                    | 0.994008615 | C48H78O17  | 925.5162989 | 327.376  | 0.757491276895966  | [M-H]-  | 925.512;925.485;71.014;89.024;101.025   |
| (+)-Costunolide       | ⑦  | Sesquiterpenoids              | 0.991842154 | C15H20O2   | 233.1536307 | 324.0795 | 2.70526624006001   | [M+H]+  | 187.147;233.154;81.069;215.141;145.101  |
| Pinocembrin           | ④  | Flavonoids                    | 0.990391462 | C15H12O4   | 255.0667621 | 368.77   | 0.932884191158441  | [M-H]-  | 255.066;151.004;213.057;256.07;83.014   |
| trans-4-Coumaric acid | ①  | Phenylpropanoids              | 0.989558923 | C9H8O3     | 163.0401547 | 82.30185 | 0.948859195427202  | [M-H]-  | 119.05;163.04;120.054;93.034;164.043    |
| Gallic acid           | ⑤⑥ | Phenols                       | 0.989457692 | C7H6O5     | 169.0143746 | 36.11095 | 2.2160963763764    | [M-H]-  | 125.025;169.015;69.035;97.03;126.027    |
| Isoalantolactone      | ⑦  | Terpenoids                    | 0.988944538 | C15H20O2   | 233.1536015 | 455.283  | 2.57993798542526   | [M+H]   | 233.154;187.147;215.142;81.069;95.085   |
| Saikosaponin A        | ④  | Terpenoids                    | 0.988435308 | C42H68O13  | 779.4569282 | 417.942  | 2.65805266981214   | [M-H]-  | 779.457;59.014;71.014;617.409;89.025    |
| Hydroprotopine        | ③  | Alkaloids                     | 0.988317923 | C20H20NO5+ | 354.1333947 | 138.1735 | 1.70933649622544   | [M+]    | 354.134;189.078;188.071;149.06;275.071  |
| Magnolol              | ⑤  | Lignans                       | 0.988189846 | C18H18O2   | 265.1233298 | 512.942  | 2.5277338114985    | [M-H]-  | 265.124;247.113;96.96;266.126;245.096   |
| Pyrogallol            | ⑥⑤ | Phenols                       | 0.988152077 | C6H6O3     | 125.0245502 | 54.4652  | 3.59808629152895   | [M-H]   | 125.025;69.035;97.03;95.034;81.036      |
| Malic acid            | ⑤  | Hydroxy acids and derivatives | 0.985465    | C4H6O5     | 133.0143447 | 101.4855 | 2.59117897285675   | [M-H]-  | 71.014;115.003;133.014;72.993;89.024    |
| Isoliquiritigenin     | ④  | Flavonoids                    | 0.985249154 | C15H12O4   | 255.066078  | 116.239  | 3.61487931035843   | [M-H]-  | 255.066;213.057;167.108;256.07;211.077  |
| Isorhamnetin          | ④  | Flavonoids                    | 0.983723462 | C16H12O7   | 315.0517766 | 165.4715 | 0.709013671968228  | [M-H]   | 315.051;300.029;151.004;148.017;241.05  |
| Rutin                 | ④  | Flavonoids                    | 0.983321692 | C27H30O16  | 609.1460276 | 80.3798  | 3.23789903497675   | [M-H]-  | 300.029;609.143;301.037;271.027;255.032 |
| Palmatine             | ①③ | Alkaloids                     | 0.982981154 | C21H22NO4  | 352.1539537 | 204.648  | 0.131499207953043  | [M]+    | 352.152;336.123;337.131;308.13;322.106  |
| Dehydrocostus lactone | ③⑦ | Terpenoids                    | 0.982516077 | C15H18O2   | 231.137788  | 218.48   | 0.917054172792167  | [M+H]   | 231.138;185.133;143.085;213.126;145.101 |
| Paeoniflorin          | ⑥  | Terpenoids                    | 0.977329385 | C23H28O11  | 498.1959797 | 82.1582  | 4.05531363252217   | [M+NH4] | 179.069;151.074;133.064;161.059;85.029  |
| Quercetin             | ④  | Flavonoids                    | 0.976100154 | C15H10O7   | 303.0496177 | 136.773  | 1.26166469372531   | [M+H]   | 303.049;257.043;153.019;229.048;285.04  |
| Tetrahydrocoptisine   | ③  | Alkaloids                     | 0.973892923 | C19H17NO4  | 324.1230354 | 161.2965 | 0.109314683439627  | [M+H]   | 324.122;176.069;149.06;119.049;91.055   |
| Luteolin              | ①  | Flavonoids                    | 0.972734308 | C15H10O6   | 285.0410232 | 252.625  | 0.0812690493426552 | [M-H]   | 285.041;151.004;125.025;133.03;83.014   |

|                                   |     |                          |             |           |             |          |                     |            |                                         |
|-----------------------------------|-----|--------------------------|-------------|-----------|-------------|----------|---------------------|------------|-----------------------------------------|
| Chrysoeriol                       | ①   | Flavonoids               | 0.969534231 | C16H12O6  | 299.056693  | 256.844  | 1.02647144234446    | [M-H]-     | 284.031;299.056;136.988;285.036;65.003  |
| Adonitol                          | ④   | Organic oxygen compounds | 0.969115077 | C5H12O5   | 151.0610882 | 33.1823  | 0.583580437977266   | [M-H]-     | 71.014;89.025;59.014;101.025;83.014     |
| Benzoic acid + 2O, O-Hex          | ⑤   | Miscellaneous            | 0.968295385 | C13H16O9  | 315.0730021 | 36.7768  | 0.00671510417482915 | [M-H]-     | 315.072;153.02;152.012;108.022;109.029  |
| Crocetin                          | ②   | Miscellaneous            | 0.966831385 | C20H24O4  | 329.1749615 | 539.6425 | 0.116963549895731   | [M+H]      | 329.173;92.67;293.155;311.164;197.097   |
| alpha-Cyperone                    | ⑦   | Terpenoids               | 0.960875385 | C15H22O   | 219.1741198 | 398.4185 | 0.546524348395279   | [M+H]+     | 219.175;201.163;161.132;145.101;159.117 |
| Shanzhiside                       | ②   | Iridoids                 | 0.960291077 | C16H24O11 | 391.1244913 | 36.7889  | 1.30050667558877    | [M-H]      | 391.124;59.014;89.025;71.014;96.96      |
| Geniposide                        | ②   | Iridoids                 | 0.959023154 | C17H24O10 | 389.1440846 | 59.6455  | 0.217482573521042   | [M+H]+     | 149.06;209.08;121.064;177.055;93.069    |
| Germacrone                        | ②   | Sesquiterpenoids         | 0.958608231 | C15H22O   | 219.1744601 | 420.919  | 2.09913556462673    | [M+H]      | 219.174;201.163;145.101;93.069;119.085  |
| Phenylacetaldehyde                | ①④  | Phenols                  | 0.957775462 | C8H8O     | 121.0647255 | 650.932  | 2.26753992055816    | [M+H]+     | 121.064;93.069;95.049;53.039;91.055     |
| 6,7-Dihydroxycoumarin             | ④   | Phenylpropanoids         | 0.957015769 | C9H6O4    | 177.0194889 | 73.7864  | 2.88700452176873    | [M-H]-     | 177.02;149.025;133.03;78.959;121.029    |
| p-Coumaric acid                   | ①   | Phenylpropanoids         | 0.9555      | C9H8O3    | 165.0545376 | 157.809  | 2.80136131171557    | [M+H]      | 147.043;119.049;91.054;165.055;123.044  |
| Oroxylin A                        | ①   | Flavonoids               | 0.954564846 | C16H12O5  | 283.0616367 | 269.4215 | 1.2833384847647     | [M-H]      | 268.038;283.062;163.003;269.04;239.034  |
| Apigenin 7-O-glucuronide          | ①   | Flavonoids               | 0.954527923 | C21H18O11 | 445.0774251 | 514.8865 | 3.53851708539347    | [M-H]      | 269.044;113.025;85.03;175.024;92.687    |
| Chlorogenic acid                  | ①②⑦ | Phenylpropanoids         | 0.951515923 | C16H18O9  | 355.1024824 | 47.4013  | 1.45765214741951    | [M+H]+     | 163.038;355.197;235.06;70.065;205.051   |
| Scutellarin                       | ①   | Flavonoids               | 0.951125231 | C21H18O12 | 461.0723468 | 91.2641  | 3.58561029215659    | [M-H]      | 285.041;113.025;59.014;89.025;71.014    |
| Chrysophanol 8-O-beta-D-glucoside | ⑤   | Flavonoids               | 0.947126231 | C21H20O9  | 415.1034336 | 246.29   | 1.36455120617734    | [M-H]      | 253.05;277.048;92.688;239.071;249.055   |
| Coumaric acid                     | ①   | Phenylpropanoids         | 0.946985385 | C9H8O3    | 147.0440795 | 261.2385 | 0.540905204927948   | [M+H-H2O]+ | 119.049;147.044;91.054;65.038;105.069   |
| Apigenin-7-O-glucoside            | ①   | Flavonoids               | 0.944903462 | C21H20O10 | 431.0983926 | 165.341  | 1.40898612343717    | [M-H]-     | 431.097;269.044;240.045;432.098;270.051 |
| Paracetamol                       | ①   | Phenol ethers            | 0.936826923 | C8H9NO2   | 152.0707237 | 104.207  | 1.8167368065099     | [M+H]+     | 152.07;134.06;106.065;79.054;96.044     |
| Luteolin-4'-O-glucoside           | ①   | Flavonoids               | 0.931069231 | C21H20O11 | 447.0940381 | 59.82405 | 0.0853134166992399  | [M-H]-     | 285.041;447.097;105.019;59.014;89.024   |
| Saikosaponin D                    | ④   | Terpenoids               | 0.926704077 | C42H68O13 | 803.4538668 | 398.909  | 2.65499563086132    | [M+Na]     | 803.46;803.503;331.101;89.272;92.668    |

|                               |        |                           |             |                |             |          |                   |           |                                         |
|-------------------------------|--------|---------------------------|-------------|----------------|-------------|----------|-------------------|-----------|-----------------------------------------|
| Caffeic acid                  | ②      | Phenylpropanoids          | 0.925192846 | C9H8O4         | 179.0351026 | 53.1675  | 0.573027258387574 | [M-H]-    | 135.046;59.014;179.036;71.014;89.024    |
| Benzoic acid                  | ⑥      | Phenols                   | 0.924726    | C7H6O2         | 123.0440939 | 96.6419  | 0.762960675651365 | [M+H]     | 123.044;67.054;79.054;81.069;95.086     |
| Sucrose                       | ⑥      | Organooxygen<br>compounds | 0.923942846 | C12H22O11      | 341.1088162 | 73.9608  | 0.53883781722736  | [M-H]     | 89.025;59.014;71.014;341.106;119.035    |
| Flavone base + 3O, O-HexA     | ①④⑥    | Flavonoids                | 0.922872308 | C21H18O11      | 447.0922283 | 210.1625 | 0.510606775441837 | [M+H]+    | 271.061;447.091;285.077;92.668;270.053  |
| Crocin I                      | ②      | Diterpenoids              | 0.915937462 | C44H64O24      | 975.3695034 | 293.355  | 4.6101434885367   | [M-H]-    | 651.273;327.162;283.17;239.179;89.024   |
| Thymol                        | ④      | Phenols                   | 0.914757    | C10H14O        | 151.1117243 | 406.8805 | 1.8247824869746   | [M+H]+    | 81.069;151.112;123.116;105.07;95.085    |
| Jatrorrhizine hydrochloride   | ③      | Alkaloids                 | 0.914114077 | C20H20NO4+.Cl- | 337.1290812 | 199.763  | 2.72531784164748  | [M-H]     | 337.13;336.123;308.125;322.106;53.157   |
| Wogonoside                    | ①④     | Flavonoids                | 0.910963    | C22H20O11      | 461.1070598 | 227.447  | 2.03901277375839  | [M+H]     | 285.076;270.052;461.105;92.672;68.89    |
| Quercetin-3-O-galactoside     | ②③④    | Flavonoids                | 0.902667385 | C21H20O12      | 463.0883664 | 47.2167  | 3.52766853922936  | [M-H]-    | 463.096;300.998;299.989;96.96;195.03    |
| 6,7,8-trimethoxychromen-2-one | ④      | Phenylpropanoids          | 0.898316385 | C12H12O5       | 237.0754791 | 210.773  | 2.19739531084057  | [M+H]+    | 237.076;222.053;176.047;207.028;191.034 |
| Octyl gallate                 | ⑥      | Aliphatics                | 0.897150462 | C15H22O5       | 281.1395474 | 128.149  | 1.60997558763484  | [M-H]     | 281.139;219.139;237.15;151.076;282.143  |
| Saikosaponin b2               | ④      | Terpenoids                | 0.890840385 | C42H68O13      | 825.4653865 | 456.08   | 0.743253307895115 | [M+FA-H]- | 779.459;779.5;59.014;617.41;92.688      |
| 5-OXO-D-PROLINE               | ⑤      | Amino acid<br>derivatives | 0.882669385 | C5H7NO3        | 128.0354182 | 34.7661  | 3.26652316832878  | [M-H]-    | 128.036;85.029;129.039;82.03;75.009     |
| Mifepristone                  | ①      | Terpenoids                | 0.882517615 | C29H35NO2      | 430.2642295 | 375.741  | 15.7356031393908  | [M+H]+    | 430.268;70.065;92.67;158.117;68.806     |
| Linoleic acid                 | ①②③④⑦⑥ | Fatty Acyls               | 0.876766231 | C18H32O2       | 281.2471803 | 523.3    | 2.91456138024922  | [M+H]+    | 57.07;83.085;71.086;81.069;69.069       |
| Albiflorin                    | ⑥      | Terpenoids                | 0.871868538 | C23H28O11      | 519.1269904 | 70.5572  | 0.018455135559556 | [M+K]+    | 519.131;57.68;92.67;70.066;72.103       |
| Camphor                       | ①④     | Terpenoids                | 0.871797846 | C10H16O        | 153.127379  | 685.986  | 2.47538514894765  | [M+H]     | 153.128;97.065;69.069;107.086;57.034    |
| (-)-Epicatechin gallate       | ⑤      | Flavonoids                | 0.867091923 | C22H18O10      | 443.097836  | 96.6102  | 0.370205757572125 | [M+H]     | 123.044;139.038;153.019;70.066;151.04   |
| Salicylic acid                | ⑥      | Phenols                   | 0.861693846 | C7H6O3         | 137.0244864 | 948.557  | 3.74796541379447  | [M-H]-    | 92.92;137.024;94.029;124.892;108.9      |
| Syringaresinol                | ①②     | Phenylpropanoids          | 0.854999308 | C22H26O8       | 417.1554669 | 148.978  | 1.27802761881465  | [M-H]-    | 417.109;297.069;181.052;166.027;269.073 |

|                                    |     |                                     |             |           |             |          |                   |                        |                                         |
|------------------------------------|-----|-------------------------------------|-------------|-----------|-------------|----------|-------------------|------------------------|-----------------------------------------|
| Isophorone                         | ②   | Organooxygen compounds              | 0.853709769 | C9H14O    | 139.1173866 | 106.677  | 38.719898182516   | [M+H] <sup>+</sup>     | 139.111;93.069;121.101;95.085;111.044   |
| Oleamide                           | ⑥   | Lipids                              | 0.850066692 | C18H35NO  | 282.2787225 | 525.384  | 0.983205721569698 | [M+H] <sup>+</sup>     | 282.279;57.07;69.069;83.086;92.67       |
| Baicalin methyl ester              | ①   | Flavonoids                          | 0.833012692 | C22H20O11 | 461.1070704 | 210.269  | 0.152740798167267 | [M+H]                  | 271.061;461.11;285.077;92.672;85.027    |
| Diethyl-phthalate                  | ④   | Benzoic acids and derivatives       | 0.830078385 | C12H14O4  | 221.0818784 | 198.714  | 0.550223681428255 | [M-H] <sup>-</sup>     | 59.014;221.083;149.061;161.062;177.092  |
| Daidzein-8-C-glucoside             | ④   | Flavonoids                          | 0.827015231 | C21H20O9  | 415.1043659 | 145.268  | 0.881455874904935 | [M-H] <sup>-</sup>     | 295.06;415.105;267.067;296.067;416.11   |
| Gardenin B                         | ②   | Flavonoids                          | 0.819920077 | C19H18O7  | 359.1122275 | 302.688  | 0.633434852895579 | [M+H]                  | 359.11;329.065;344.088;92.67;58.803     |
| Rhein                              | ⑤   | Quinones                            | 0.819040462 | C15H8O6   | 283.0249361 | 350.2295 | 0.22594044848151  | [M-H]                  | 257.044;239.036;283.026;183.046;268.038 |
| Ligustilide                        | ④   | Dihydrofurans                       | 0.814579846 | C12H14O2  | 191.1064478 | 458.479  | 2.88974642928563  | [M+H]                  | 191.106;173.096;145.101;91.054;117.07   |
| Ursolic acid                       | ②⑥  | Terpenoids                          | 0.812291923 | C30H48O3  | 439.3575588 | 710.568  | 1.00417102914801  | [M+H-H2O] <sup>-</sup> | 203.181;439.358;191.178;189.164;119.085 |
| Cinnamaldehyde                     | ⑦   | Phenylpropanoids                    | 0.812286385 | C9H8O     | 133.064848  | 411.73   | 1.14226853505306  | [M+H]                  | 105.07;133.065;91.055;79.054;103.055    |
| Flavonol base + 3O, O-Hex          | ⑥   | Flavonoids                          | 0.811826308 | C21H20O11 | 447.0947323 | 297.549  | 2.83536421113543  | [M-H] <sup>-</sup>     | 285.041;447.096;241.05;240.041;284.031  |
| Cinnamic acid                      | ⑤   | Phenylpropanoids                    | 0.805996769 | C9H8O2    | 149.0597689 | 59.6624  | 1.55060934792742  | [M+H]                  | 121.064;91.055;93.069;149.06;81.069     |
| Vicenin 2                          | ④   | Flavonoids                          | 0.803093385 | C27H30O15 | 595.1643373 | 116.639  | 4.47389374190923  | [M+H] <sup>+</sup>     | 287.054;271.061;85.028;71.049;70.065    |
| Crocin II                          | ②   | Diterpenoids                        | 0.802479154 | C38H54O19 | 813.3204059 | 340.447  | 1.96004694526145  | [M-H]                  | 89.025;92.686;59.014;71.014;101.025     |
| Acetophenone                       | ①④  | Phenols                             | 0.790254615 | C8H8O     | 121.0647825 | 269.861  | 1.7964498881404   | [M+H]                  | 121.064;91.055;93.069;95.049;53.039     |
| Quercetin-3-O-beta-glucopyranoside | ②③④ | Flavonoids                          | 0.779157923 | C21H20O12 | 465.1031587 | 86.9273  | 1.80889525961696  | [M+H] <sup>+</sup>     | 303.049;85.028;289.072;169.012;97.028   |
| 4-Phenyl-3-buten-2-one             | ⑤   | Benzene and substituted derivatives | 0.765770769 | C10H10O   | 147.0804647 | 491.187  | 3.15950689248914  | [M+H] <sup>+</sup>     | 147.081;119.085;105.07;91.054;117.07    |
| Oxypaeoniflorin                    | ⑥   | Terpenoids                          | 0.764679231 | C23H28O12 | 495.1508212 | 41.5155  | 2.38059107327979  | [M-H]                  | 137.025;121.029;93.034;495.144;89.025   |
| Kaempferol-3-O-glucoside           | ⑥   | Flavonoids                          | 0.758566923 | C21H20O11 | 447.0940649 | 138.312  | 0.145112264068918 | [M-H] <sup>-</sup>     | 284.031;447.097;255.031;285.037;240.045 |

|                                  |     |                               |             |            |             |          |                    |            |                                         |
|----------------------------------|-----|-------------------------------|-------------|------------|-------------|----------|--------------------|------------|-----------------------------------------|
| Agarotetrol                      | ⑦   | Phenols                       | 0.758400769 | C17H18O6   | 317.1033868 | 247.459  | 1.21987874014049   | [M-H]      | 317.102;125.025;169.015;96.96;124.017   |
| Carveol                          | ④   | Prenol lipids                 | 0.756679077 | C10H16O    | 135.116689  | 358.83   | 2.30177645946651   | [M+H-H2O]- | 93.069;79.054;135.116;107.086;67.055    |
| Shanzhiside methyl ester         | ②   | Terpenoids                    | 0.750240615 | C17H26O11  | 405.1401146 | 38.4706  | 2.18550115429578   | [M-H]-     | 61.988;225.077;149.061;71.014;405.101   |
| Epiberberine                     | ①   | Alkaloids                     | 0.745879    | C20H18NO4+ | 336.1227359 | 162.2225 | 3.76097238647605   | [M+]       | 336.123;320.092;292.097;321.1;308.125   |
| Skullcapflavone II               | ①   | Flavonoids                    | 0.734323615 | C19H18O8   | 375.1070103 | 253.052  | 0.0275197201630398 | [M+H]+     | 375.109;345.059;360.086;327.049;197.007 |
| Sorbitol                         | ②   | Organic oxygen compounds      | 0.716964923 | C6H14O6    | 181.0720111 | 906.786  | 0.0610575755368815 | [M-H]-     | 112.986;59.014;101.023;71.013;89.023    |
| Dibutylphthalate                 | ①④⑥ | Organic acids and derivatives | 0.710760769 | C16H22O4   | 279.1587977 | 604.4385 | 0.724592445738971  | [M+H]+     | 149.023;57.07;81.069;51.049;54.514      |
| Afzelin                          | ①   | Flavonoids                    | 0.710584077 | C21H20O10  | 431.0984233 | 205.5685 | 1.33769401319269   | [M-H]-     | 311.058;269.044;431.096;267.068;239.071 |
| Corydaline                       | ③   | Alkaloids                     | 0.702200538 | C22H27NO4  | 370.2014083 | 194.9745 | 1.10284079923063   | [M+H]      | 370.203;192.102;165.091;150.067;179.106 |
| Lysionotin                       | ②   | Flavonoids                    | 0.694353538 | C18H16O7   | 345.0962391 | 365.829  | 2.20485148420229   | [M+H]      | 345.095;315.047;312.061;330.075;159.118 |
| Progesterone                     | ⑤   | Terpenoids                    | 0.693585    | C21H30O2   | 315.2317886 | 737.609  | 0.670762187461146  | [M+H]+     | 71.085;315.233;55.018;245.153;175.074   |
| Phenylacetic acid                | ④   | Aromaticity                   | 0.680484385 | C8H8O2     | 135.0452602 | 89.3459  | 1.92645385496143   | [M-H]-     | 135.046;75.009;93.033;108.021;72.993    |
| Daidzin                          | ①   | Flavonoids                    | 0.679841615 | C21H20O9   | 417.1185742 | 224.979  | 1.37647224934729   | [M+H]+     | 255.066;85.028;417.164;167.07;191.07    |
| Methyl gallate                   | ⑥   | Phenols                       | 0.670348538 | C8H8O5     | 183.0299744 | 51.0732  | 0.139778864495029  | [M-H]      | 168.007;124.017;183.029;139.041;155.072 |
| Demethyleneberberine             | ③   | Alkaloids                     | 0.670251308 | C19H18NO4+ | 324.1230228 | 120.751  | 0.07036374901387   | [M+]       | 324.122;309.097;294.076;70.064;115.039  |
| Norglaucine                      | ③   | Alkaloids                     | 0.669897615 | C20H23NO4  | 342.1695862 | 163.192  | 1.20947197467706   | [M+H]+     | 294.124;325.142;310.119;342.171;279.1   |
| Epicatechin                      | ①⑤  | Flavonoids                    | 0.666067769 | C15H14O6   | 291.0866994 | 47.9385  | 2.40276323999479   | [M+H]      | 139.039;123.044;147.045;165.054;291.176 |
| Rhaponticin                      | ⑤   | Phenols                       | 0.665524    | C21H24O9   | 421.1491907 | 131.0025 | 1.92175651756043   | [M+H]      | 105.069;91.055;325.104;301.107;151.038  |
| Genipin 1-O-beta-D-gentiobioside | ②   | Iridoid glucoside             | 0.663358462 | C23H34O15  | 549.1834946 | 52.5372  | 0.920274420082507  | [M-H]      | 101.025;123.045;225.077;68.998;207.067  |
| Pyroglutamic acid                | ⑤   | Amino acid                    | 0.659669231 | C5H7NO3    | 130.0499874 | 38.9508  | 0.0966768722680678 | [M+H]+     | 70.066;84.081;71.049;60.056;130.086     |



|                              |   |                           |             |                        |             |          |                   |                      |                                         |
|------------------------------|---|---------------------------|-------------|------------------------|-------------|----------|-------------------|----------------------|-----------------------------------------|
|                              |   | derivatives               |             |                        |             |          |                   |                      |                                         |
| Glaucine                     | ③ | Alkaloids                 | 0.650949538 | C21H25NO4              | 356.1854417 | 218.009  | 1.56737447858658  | [M+H] <sup>+</sup>   | 294.124;325.143;356.184;310.12;279.1    |
| beta-penta-O-galloyl-glucose | ⑥ | Phenols                   | 0.647886385 | C41H32O26              | 939.1103969 | 177.4195 | 3.83669330339616  | [M-H] <sup>-</sup>   | 169.013;939.119;92.692;769.099;125.025  |
| Hesperidin                   | ⑤ | Flavonoids                | 0.635708154 | C28H34O15              | 609.1821086 | 152.384  | 1.46321858668474  | [M-H] <sup>-</sup>   | 301.072;609.186;164.011;286.048;137.024 |
| Benzoylpaeoniflorin          | ⑥ | Terpenoids                | 0.621015538 | C30H32O12              | 602.2222436 | 263.309  | 7.89805254019096  | [M+NH4] <sup>+</sup> | 105.033;179.07;267.085;249.076;151.075  |
| 5-Hydroxymethylfurfural      | ④ | Organooxygen<br>compounds | 0.620116615 | C6H6O3                 | 127.0389331 | 4.17116  | 0.526482215762994 | [M+H] <sup>+</sup>   | 127.039;109.029;81.033;53.039;55.018    |
| Dehydrocorydaline            | ③ | Alkaloids                 | 0.618868538 | C22H24NO4 <sup>+</sup> | 366.1695723 | 228.4665 | 1.16800338787648  | [M] <sup>+</sup>     | 366.17;350.136;351.145;322.144;336.123  |
| Sennoside B                  | ⑤ | Anthraquinones            | 0.610872154 | C42H38O20              | 861.1875001 | 194.85   | 1.74168253471177  | [M-H] <sup>-</sup>   | 269.044;445.077;415.105;295.06;113.025  |
| Oxoglucine                   | ③ | Alkaloids                 | 0.608245692 | C20H17NO5              | 352.1178853 | 381.222  | 0.32580059058852  | [M+H] <sup>+</sup>   | 352.12;337.096;322.073;92.67;308.089    |

Note: ①: Scutellaria baicalensis. ②: Fructus Gardeniae. ③: Rhizoma corydalis. ④: Radix bupleuri. ⑤: Rheum officinale. ⑥: Radix paeoniae alba. ⑦: Costustoot.

**Supplementary Table S15.** Ligand-receptor pair binding energies.

| Compound<br>Target | corydaline | rhein  | tetrahydro<br>optisine | pulmatin | trans-4-cou<br>maricacid | chrysoeriol | isoliquiriti<br>genin | kaempferol-3-O-<br>glucoside | laxapur | wogonoside |
|--------------------|------------|--------|------------------------|----------|--------------------------|-------------|-----------------------|------------------------------|---------|------------|
| ESR1               | -8.71      | -5.14  | -6.13                  | -5.39    | -7.93                    | -7          | -3.65                 | -6.87                        | -8.61   | -8.57      |
| MMP9               | -7.35      | -7.01  | -8.35                  | -7.83    | -8.08                    | -8.68       | -7.73                 | -8.85                        | -7.89   | -7.64      |
| KDR                | -9.06      | -8.7   | -7.54                  | -7.01    | -6.5                     | -7.09       | -6.51                 | -6.64                        | -5.69   | -5.72      |
| XDH                | -5         | -11.36 | -10.98                 | -7.75    | -6.73                    | -9.55       | -7.61                 | -9.22                        | -10.2   | -6.49      |
| SLC29A1            | -7.11      | -5.78  | -6.62                  | -9.96    | -8.81                    | -5.27       | -8.9                  | -9.75                        | -6.67   | -5.01      |
| PIM1               | -9.03      | -7.74  | -7.75                  | -8.35    | -8.84                    | -4.35       | -7.34                 | -7.17                        | -7.1    | -6.73      |
| PTPN1              | -6.85      | -7.69  | -7.92                  | -8.32    | -7.05                    | -8.27       | -10.67                | -8.4                         | -5.88   | -9.79      |
| MAOB               | -6.43      | -6.08  | -10.12                 | -7.76    | -6.38                    | -9.4        | -5.21                 | -7.66                        | -8.17   | -8.62      |
| NQO2               | -6.7       | -6.29  | -8.46                  | -5.82    | -7.85                    | -6.71       | -7.4                  | -7.54                        | -7.04   | -9.71      |
| DPP4               | -8.17      | -6.67  | -6.96                  | -6.39    | -6.19                    | -7.89       | -4.03                 | -8.64                        | -7.21   | -8.45      |

Unit: kcal/mol.
